# Supplementary material
Source: Copernicus journal article supplement (doi:10.5194/acp-26-6579-2026)
Supplement: Supplementary file 1 [file acp-26-6579-2026-supplement.pdf]

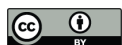

*Supplement of*

**Evaluated kinetic and photochemical data for atmospheric chemistry: Volume IX – gas-phase reactions of halogenated alkanes, alkenes, and oxygenated compounds**

**Timothy J. Wallington et al.**

*Correspondence to:* Timothy J. Wallington ([twalling@umich.edu](mailto:twalling@umich.edu)) and John N. Crowley ([john.crowley@mpic.de](mailto:john.crowley@mpic.de))

The copyright of individual parts of the supplement might differ from the article licence.

51 Detailed data sheets for the gas phase and photochemical reactions of halogenated alkanes, alkenes,  
 52 and oxygenated organic compounds implemented on the IUPAC website since 2008, IUPAC Task  
 53 Group on Atmospheric Chemical Kinetic Data Evaluation, (<https://iupac.aeris-data.fr/>), access date:  
 54 December 31<sup>st</sup> 2025.  
 55

## 56 Contents

| Datasheet <sup>b</sup><br>ID | Reaction                                                                                                                                                                | Page |
|------------------------------|-------------------------------------------------------------------------------------------------------------------------------------------------------------------------|------|
| <b>Halogenated alkanes</b>   |                                                                                                                                                                         |      |
| oFOx72                       | HO + CF <sub>3</sub> CH <sub>2</sub> CH <sub>3</sub> (HFC-263fb) → products                                                                                             | 5    |
| oFOx73                       | HO + CF <sub>3</sub> CHFCH <sub>2</sub> F (HFC-245eb) → products                                                                                                        | 7    |
| oFOx74                       | HO + CHF <sub>2</sub> CHFCHF <sub>2</sub> (HFC-245ea) → products                                                                                                        | 9    |
| oFOx75                       | HO + CF <sub>3</sub> CH <sub>2</sub> CHF <sub>2</sub> (HFC-245fa) → products                                                                                            | 11   |
| oFOx76                       | HO + CF <sub>3</sub> CH <sub>2</sub> CF <sub>2</sub> CH <sub>3</sub> (HFC-365mfc) → products                                                                            | 13   |
| oFOx77                       | HO + CF <sub>3</sub> CH <sub>2</sub> CH <sub>2</sub> CF <sub>3</sub> (HFC-356mff) → products                                                                            | 15   |
| oFOx78                       | HO + CF <sub>3</sub> CF <sub>2</sub> CH <sub>2</sub> CH <sub>2</sub> F (HFC-356mcf) → products                                                                          | 17   |
| oFOx79                       | HO + CHF <sub>2</sub> CF <sub>2</sub> CF <sub>2</sub> CHF <sub>2</sub> (HFC-338pcc) → products                                                                          | 19   |
| oFOx80                       | HO + CF <sub>3</sub> CH <sub>2</sub> CF <sub>2</sub> CH <sub>2</sub> CF <sub>3</sub> (HFC-458mfcf) → products                                                           | 21   |
| oFOx81                       | HO + CF <sub>3</sub> CHFCHF <sub>2</sub> CF <sub>3</sub> (HFC-44-10mee) → products                                                                                      | 23   |
| oFOx82                       | HO + CF <sub>3</sub> CF <sub>2</sub> CH <sub>2</sub> CH <sub>2</sub> CF <sub>2</sub> CF <sub>3</sub> (HFC-55-10mceff) → products                                        | 25   |
| oFOx83                       | HO + CHF <sub>2</sub> (CF <sub>2</sub> ) <sub>4</sub> CF <sub>3</sub> (HFC-52-13p) → CHF <sub>2</sub> (CF <sub>2</sub> ) <sub>4</sub> CF <sub>3</sub> +H <sub>2</sub> O | 26   |
| oClOx86                      | HO + C <sub>2</sub> H <sub>5</sub> Cl → products                                                                                                                        | 28   |
| oClOx87                      | HO + CH <sub>2</sub> ClCH <sub>2</sub> Cl → products                                                                                                                    | 30   |
| oClOx88                      | HO + CH <sub>3</sub> CHCl <sub>2</sub> → products                                                                                                                       | 32   |
| oBrOx16                      | HO + CHBr <sub>3</sub> → products                                                                                                                                       | 34   |
| oBrOx17                      | HO + C <sub>2</sub> H <sub>5</sub> Br → products                                                                                                                        | 36   |
| oBrOx18                      | HO + CH <sub>2</sub> BrCH <sub>2</sub> Br → products                                                                                                                    | 38   |
| oBrOx19                      | HO + <i>n</i> -C <sub>3</sub> H <sub>7</sub> Br → products                                                                                                              | 40   |
| oBrOx20                      | HO + CH <sub>3</sub> CHBrCH <sub>3</sub> → products                                                                                                                     | 43   |
| oBrOx21                      | HO + <i>n</i> -C <sub>4</sub> H <sub>9</sub> Br → products                                                                                                              | 45   |
| oBrOx22                      | HO + <i>n</i> -C <sub>5</sub> H <sub>11</sub> Br → products                                                                                                             | 46   |
| oBrOx23                      | HO + <i>n</i> -C <sub>6</sub> H <sub>13</sub> Br → products                                                                                                             | 47   |
| oIOx4                        | HO + CH <sub>3</sub> CH <sub>2</sub> I → products                                                                                                                       | 48   |
| oIOx5                        | HO + CH <sub>3</sub> CH <sub>2</sub> CH <sub>2</sub> I → products                                                                                                       | 50   |
| oIOx6                        | HO + CH <sub>3</sub> CHICH <sub>3</sub> → products                                                                                                                      | 52   |
| oFOx108                      | Cl + CHF <sub>2</sub> CH <sub>2</sub> CF <sub>3</sub> (HFC-245fa) → products                                                                                            | 54   |
| oFOx110                      | Cl + CF <sub>3</sub> CHF <sub>2</sub> CF <sub>3</sub> (HFC-227ea)                                                                                                       | 55   |
| oFOx111                      | Cl + CHF <sub>3</sub> (HFC-23) → products                                                                                                                               | 56   |
| oBrOx24                      | Cl + CH <sub>3</sub> Br → products                                                                                                                                      | 58   |
| <b>Halogenated alkenes</b>   |                                                                                                                                                                         |      |
| oFOx112                      | HO + CF <sub>2</sub> =CF <sub>2</sub> (HFO-1114) → products                                                                                                             | 61   |
| oFOx114                      | HO + CF <sub>3</sub> CF=CH <sub>2</sub> (HFO-1234yf) → products                                                                                                         | 63   |
| oFOx115                      | HO + <i>E</i> -CF <sub>3</sub> CH=CHF (HFO-1234ze(E)) → products                                                                                                        | 66   |
| oFOx117                      | HO + <i>Z</i> -CF <sub>3</sub> CH=CHF (HFO-1234ze(Z)) → products                                                                                                        | 69   |
| oFOx118                      | HO + <i>E</i> -CF <sub>3</sub> CF=CHF (HFO-1225ze(E)) → products                                                                                                        | 72   |
| oFOx119                      | HO + <i>Z</i> -CF <sub>3</sub> CF=CHF (HFO-1225ze(Z)) → products                                                                                                        | 74   |
| oFOx116                      | HO + CF <sub>3</sub> CF <sub>2</sub> =CF <sub>2</sub> (FO-1216) → products                                                                                              | 76   |
| oFOx135                      | HO + <i>E</i> -CF <sub>3</sub> CH=CHCF <sub>3</sub> (HFO-1336mzz(E)) → products                                                                                         | 79   |
| oFOx136                      | HO + <i>Z</i> -CF <sub>3</sub> CH=CHCF <sub>3</sub> (HFO-1336mzz(Z)) → products                                                                                         | 82   |
| oClOx95                      | HO + CH <sub>2</sub> =CHCl (vinyl chloride) → products                                                                                                                  | 84   |
| oFOx120                      | HO + <i>E</i> -CF <sub>3</sub> CH=CHCl (HCFO-1233zd(E)) → products                                                                                                      | 86   |
| oFOx121                      | HO + <i>Z</i> -CF <sub>3</sub> CH=CHCl (HCFO-1233zd(Z)) → products                                                                                                      | 88   |
| oFOx165                      | HO + <i>E</i> -CF <sub>3</sub> CF=CHCl (HCFO-1224yd(E)) → products                                                                                                      | 90   |
| oFOx166                      | HO + <i>Z</i> -CF <sub>3</sub> CF=CHCl (HCFO-1224yd(Z)) → products                                                                                                      | 92   |
| oFOx164                      | HO + <i>E</i> -CF <sub>3</sub> CBr=CH <sub>2</sub> (HBFO-1233xfB) → products                                                                                            | 94   |
| oFOx154                      | NO <sub>3</sub> + CF <sub>2</sub> =CF <sub>2</sub> (HFO-1114) → products                                                                                                | 96   |
| oFOx153                      | NO <sub>3</sub> + CF <sub>3</sub> CF <sub>2</sub> =CH <sub>2</sub> (HFO-1234yf) → products                                                                              | 97   |
| oFOx122                      | NO <sub>3</sub> + <i>Z</i> -CF <sub>3</sub> CF=CHF (HFO-1225ye(Z)) → products                                                                                           | 98   |
| oFOx123                      | NO <sub>3</sub> + CF <sub>3</sub> CF <sub>2</sub> =CF <sub>2</sub> (FO-1216) → products                                                                                 | 99   |
| oFOx155                      | NO <sub>3</sub> + CF <sub>2</sub> =CF <sub>2</sub> CF=CF <sub>2</sub> → products                                                                                        | 100  |

|                              |                                                                                                     |     |
|------------------------------|-----------------------------------------------------------------------------------------------------|-----|
| oClOx96                      | $\text{NO}_3 + \text{CH}_2=\text{CHCl}$ (vinyl chloride) $\rightarrow$ products                     | 101 |
| oFOx126                      | $\text{O}_3 + \text{CF}_2=\text{CF}_2$ (HFO-1114) $\rightarrow$ products                            | 104 |
| oFOx113                      | $\text{O}_3 + \text{CF}_3\text{CH}=\text{CH}_2$ (HFO-1243zf) $\rightarrow$ products                 | 106 |
| oFOx128                      | $\text{O}_3 + \text{CF}_3\text{CF}=\text{CH}_2$ (HFO-1234yf) $\rightarrow$ products                 | 109 |
| oFOx129                      | $\text{O}_3 + E\text{-CF}_3\text{CH}=\text{CHF}$ (HFO-1234ze(E)) $\rightarrow$ products             | 111 |
| oFOx156                      | $\text{O}_3 + Z\text{-CF}_3\text{CH}=\text{CHF}$ (HFO-1234ze(Z)) $\rightarrow$ products             | 112 |
| oFOx130                      | $\text{O}_3 + \text{CF}_3\text{CF}_2=\text{CF}_2$ (FO-1216) $\rightarrow$ products                  | 113 |
| oFOx157                      | $\text{O}_3 + \text{CF}_2=\text{CFCF}=\text{CF}_2$ $\rightarrow$ products                           | 115 |
| oFOx127                      | $\text{O}_3 + E\text{-CF}_3\text{CH}=\text{CHCF}_3$ (HFO-1336mzz(E)) $\rightarrow$ products         | 117 |
| oFOx124                      | $\text{O}_3 + Z\text{-CF}_3\text{CH}=\text{CHCF}_3$ (HFO-1336mzz(Z)) $\rightarrow$ products         | 118 |
| oClOx97                      | $\text{O}_3 + \text{CH}_2=\text{CHCl}$ (vinyl chloride) $\rightarrow$ products                      | 120 |
| oFOx132                      | $\text{O}_3 + E\text{-CF}_3\text{CH}=\text{CHCl}$ (HCFO-1233zd(E)) $\rightarrow$ products           | 121 |
| oFOx131                      | $\text{O}_3 + Z\text{-CF}_3\text{CH}=\text{CHCl}$ (HCFO-1233zd(Z)) $\rightarrow$ products           | 122 |
| oFOx125                      | $\text{O}_3 + \text{CF}_3\text{CCl}=\text{CH}_2$ (HCFO-1233xf) $\rightarrow$ products               | 123 |
| <b>Halogenated alcohols</b>  |                                                                                                     |     |
| oFOx84                       | $\text{HO} + \text{CH}_2\text{FCH}_2\text{OH}$ $\rightarrow$ products                               | 125 |
| oFOx85                       | $\text{HO} + \text{CHF}_2\text{CH}_2\text{OH}$ $\rightarrow$ products                               | 127 |
| oFOx86                       | $\text{HO} + \text{CF}_3\text{CH}_2\text{OH}$ $\rightarrow$ products                                | 129 |
| oFOx87                       | $\text{HO} + \text{CF}_3\text{CH}_2\text{CH}_2\text{OH}$ $\rightarrow$ products                     | 132 |
| oFOx88                       | $\text{HO} + \text{C}_2\text{F}_5\text{CH}_2\text{OH}$ $\rightarrow$ products                       | 135 |
| oFOx89                       | $\text{HO} + \text{CF}_3\text{CH}(\text{OH})\text{CF}_3$ $\rightarrow$ products                     | 138 |
| oFOx158                      | $\text{HO} + (\text{CF}_3)_2\text{C}(\text{OH})\text{CH}_3$ $\rightarrow$ products                  | 140 |
| oFOx159                      | $\text{HO} + (\text{CF}_3)_3\text{COH}$ $\rightarrow$ products                                      | 142 |
| oFOx90                       | $\text{HO} + \text{CF}_3\text{CHF}_2\text{CH}_2\text{OH}$ $\rightarrow$ products                    | 144 |
| oFOx91                       | $\text{HO} + n\text{-C}_3\text{F}_7\text{CH}_2\text{OH}$ $\rightarrow$ products                     | 146 |
| oFOx92                       | $\text{HO} + n\text{-C}_4\text{F}_9\text{CH}_2\text{OH}$ $\rightarrow$ products                     | 148 |
| oFOx93                       | $\text{HO} + n\text{-C}_4\text{F}_9\text{CH}_2\text{CH}_2\text{OH}$ $\rightarrow$ products          | 149 |
| oFOx94                       | $\text{HO} + n\text{-C}_6\text{F}_{13}\text{CH}_2\text{CH}_2\text{OH}$ $\rightarrow$ products       | 151 |
| oFOx95                       | $\text{HO} + n\text{-C}_8\text{F}_{17}\text{CH}_2\text{CH}_2\text{OH}$ $\rightarrow$ products       | 153 |
| oFOx96                       | $\text{HO} + \text{CF}_3\text{CH}(\text{OH})_2$ $\rightarrow$ products                              | 155 |
| oClOx90                      | $\text{HO} + \text{CH}_2\text{ClCH}_2\text{OH}$ $\rightarrow$ products                              | 156 |
| oClOx91                      | $\text{HO} + \text{CCl}_3\text{CH}_2\text{OH}$ $\rightarrow$ products                               | 157 |
| <b>Halogenated aldehydes</b> |                                                                                                     |     |
| oFOx97                       | $\text{HO} + \text{CHF}_2\text{CHO}$ $\rightarrow$ products                                         | 158 |
| oFOx98                       | $\text{HO} + \text{C}_2\text{F}_5\text{CHO}$ $\rightarrow$ products                                 | 160 |
| oFOx99                       | $\text{HO} + n\text{-C}_3\text{F}_7\text{CHO}$ $\rightarrow$ products                               | 162 |
| oFOx100                      | $\text{HO} + n\text{-C}_4\text{F}_9\text{CHO}$ $\rightarrow$ products                               | 164 |
| oFOx101                      | $\text{HO} + \text{CF}_3\text{CH}_2\text{CHO}$ $\rightarrow$ products                               | 166 |
| oFOx102                      | $\text{HO} + n\text{-C}_6\text{F}_{13}\text{CH}_2\text{CHO}$ $\rightarrow$ products                 | 169 |
| oFOx103                      | $\text{HO} + n\text{-C}_8\text{F}_{17}\text{CH}_2\text{CHO}$ $\rightarrow$ products                 | 170 |
| <b>Halogenated ketones</b>   |                                                                                                     |     |
| oFOx104                      | $\text{HO} + \text{C}_2\text{F}_5\text{C}(\text{O})\text{CF}(\text{CF}_3)_2$ $\rightarrow$ products | 171 |
| oClOx92                      | $\text{HO} + \text{CH}_2\text{ClC}(\text{O})\text{CH}_3$ $\rightarrow$ products                     | 172 |
| oClOx93                      | $\text{HO} + \text{CHCl}_2\text{C}(\text{O})\text{CH}_3$ $\rightarrow$ products                     | 173 |
| oClOx94                      | $\text{HO} + \text{CCl}_3\text{C}(\text{O})\text{CH}_3$ $\rightarrow$ products                      | 174 |
| <b>Halogenated acids</b>     |                                                                                                     |     |
| oFOx105                      | $\text{HO} + \text{C}_2\text{F}_5\text{C}(\text{O})\text{OH}$ $\rightarrow$ products                | 175 |
| oFOx106                      | $\text{HO} + n\text{-C}_3\text{F}_7\text{C}(\text{O})\text{OH}$ $\rightarrow$ products              | 176 |
| oFOx107                      | $\text{HO} + n\text{-C}_4\text{F}_9\text{C}(\text{O})\text{OH}$ $\rightarrow$ products              | 177 |
| <b>Halogenated ethers</b>    |                                                                                                     |     |
| oFOx137                      | $\text{HO} + \text{CH}_3\text{OCHF}_2$ $\rightarrow$ products                                       | 178 |
| oFOx138                      | $\text{HO} + \text{CH}_3\text{OCF}_3$ $\rightarrow$ products                                        | 180 |
| oFOx139                      | $\text{HO} + \text{CHF}_2\text{OCHF}_2$ $\rightarrow$ products                                      | 182 |
| oFOx140                      | $\text{HO} + \text{CHF}_2\text{OCF}_3$ $\rightarrow$ products                                       | 185 |
| oFOx141                      | $\text{HO} + \text{CH}_3\text{OCHF}_2\text{CF}_3$ $\rightarrow$ products                            | 187 |
| oFOx142                      | $\text{HO} + \text{CH}_3\text{OCF}_2\text{CHF}_2$ $\rightarrow$ products                            | 189 |
| oFOx143                      | $\text{HO} + \text{CH}_3\text{OCH}_2\text{CF}_3$ $\rightarrow$ products                             | 191 |
| oFOx144                      | $\text{HO} + \text{CH}_3\text{OC}_2\text{F}_5$ $\rightarrow$ products                               | 194 |
| oFOx145                      | $\text{HO} + n\text{-C}_3\text{F}_7\text{OCH}_3$ $\rightarrow$ products                             | 196 |
| oFOx146                      | $\text{HO} + i\text{-C}_3\text{F}_7\text{OCH}_3$ $\rightarrow$ products                             | 199 |
| oFOx147                      | $\text{HO} + \text{C}_4\text{F}_9\text{OCH}_3$ $\rightarrow$ products                               | 201 |
| oFOx148                      | $\text{HO} + \text{CH}_3\text{OCH}(\text{CF}_3)_2$ $\rightarrow$ products                           | 205 |
| oFOx149                      | $\text{HO} + \text{CH}_2\text{FOCH}(\text{CF}_3)_2$ (Sevoflurane) $\rightarrow$ products            | 207 |
| oFOx150                      | $\text{HO} + \text{CHF}_2\text{OCHF}_2\text{CF}_3$ (Desflurane) $\rightarrow$ products              | 210 |

**Halogenated vinyl ethers**

|         |                                                                   |     |
|---------|-------------------------------------------------------------------|-----|
| oFOx133 | HO + CF <sub>3</sub> OCF=CF <sub>2</sub> → products               | 212 |
| oFOx134 | HO + C <sub>2</sub> F <sub>5</sub> OCF=CF <sub>2</sub> → products | 214 |

**Peroxy radicals**

|         |                                                                                                                   |     |
|---------|-------------------------------------------------------------------------------------------------------------------|-----|
| oFOx160 | CF <sub>3</sub> C(O)O <sub>2</sub> + HO <sub>2</sub> → CF <sub>3</sub> C(O)OOH + O <sub>2</sub> (1)               | 216 |
|         | → CF <sub>3</sub> C(O)OH + O <sub>3</sub> (2)                                                                     |     |
|         | → CF <sub>3</sub> C(O)O + HO (3)                                                                                  |     |
| <hr/>   |                                                                                                                   |     |
|         | Overall                                                                                                           |     |
| oFOx161 | CF <sub>3</sub> C(O)O <sub>2</sub> + NO → CF <sub>3</sub> C(O)O + NO <sub>2</sub>                                 | 218 |
| oFOx162 | CF <sub>3</sub> C(O)O <sub>2</sub> + NO <sub>2</sub> + M → CF <sub>3</sub> C(O)O <sub>2</sub> NO <sub>2</sub> + M | 220 |
| oFOx163 | CF <sub>3</sub> C(O)O <sub>2</sub> NO <sub>2</sub> + M → CF <sub>3</sub> C(O)O <sub>2</sub> + NO <sub>2</sub> + M | 221 |

|      |                                                                              |     |
|------|------------------------------------------------------------------------------|-----|
| PF5  | CHF <sub>2</sub> CHO + hν → products                                         | 224 |
| PF6  | C <sub>2</sub> F <sub>5</sub> CHO + hν → products                            | 227 |
| PF7  | <i>n</i> -C <sub>3</sub> F <sub>7</sub> CHO + hν → products                  | 231 |
| PF8  | <i>n</i> -C <sub>4</sub> F <sub>9</sub> CHO + hν → products                  | 234 |
| PF9  | CF <sub>3</sub> CH <sub>2</sub> CHO + hν → products                          | 237 |
| PF10 | <i>n</i> -C <sub>6</sub> F <sub>13</sub> CH <sub>2</sub> CHO + hν → products | 241 |

---

58

59

60

61 **oFOx72: HO + CF<sub>3</sub>CH<sub>2</sub>CH<sub>3</sub> (HFC-263fb)**  
 62 Last evaluated: June 2025; Last change in preferred values: June 2009.

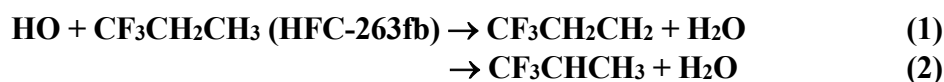

66  
 67 **Rate coefficient data ( $k = k_1 + k_2$ )**  
 68

| $k/\text{cm}^3 \text{ molecule}^{-1} \text{ s}^{-1}$ | $T/\text{K}$ | Reference               | Technique/<br>Comments |
|------------------------------------------------------|--------------|-------------------------|------------------------|
| <i>Absolute Rate Coefficients</i>                    |              |                         |                        |
| $(4.00 \pm 0.13) \times 10^{-14}$                    | 295          | Nelson et al. (1995)    | DF-LIF (a)             |
| $4.36 \times 10^{-12} \exp[-(1290 \pm 40)/T]$        | 238-373      | Rajakumar et al. (2006) | PLP-LIF (b)            |
| $5.50 \times 10^{-14}$                               | 297          |                         |                        |

69  
 70 **Comments**

- 71  
 72 (a) HO radicals produced via the H + NO<sub>2</sub> reaction. Experiments were performed in 1.1-2.0 Torr (1.5-  
 73 2.7 mbar) of helium diluent.  
 74 (b) HO radicals produced by 248 nm photolysis of H<sub>2</sub>O<sub>2</sub>. Experiments were performed in 50-210 Torr  
 75 (67-280 mbar) of helium diluent. The value given at 297 K is the average of the four determinations  
 76 reported.

77  
 78 **Preferred Values**  
 79

| Parameter                                            | Value                               | $T/\text{K}$ |
|------------------------------------------------------|-------------------------------------|--------------|
| $k/\text{cm}^3 \text{ molecule}^{-1} \text{ s}^{-1}$ | $4.9 \times 10^{-14}$               | 298          |
| $k/\text{cm}^3 \text{ molecule}^{-1} \text{ s}^{-1}$ | $3.7 \times 10^{-12} \exp(-1290/T)$ | 240-370      |
| <i>Reliability</i>                                   |                                     |              |
| $\Delta \log k$                                      | 0.15                                | 298          |
| $\Delta E/R$                                         | $\pm 300$                           | 240-370      |

80  
 81  
 82 **Comments on Preferred Values**

83  
 84  
 85 The result from Nelson et al. (1995) lies approximately 25% below that from Rajakumar et al.  
 86 (2006). Such a difference is within the combined uncertainties from the two studies. Adjusting the rate  
 87 coefficients reported at 295 K by Nelson et al. (1995) and at 297 K by Rajakumar et al. (2006) using the  
 88 temperature dependence reported by Rajakumar et al. (2006) and taking an average gives the preferred  
 89 value of  $k = 4.9 \times 10^{-14} \text{ cm}^3 \text{ molecule}^{-1} \text{ s}^{-1}$  at 298 K. The temperature dependence is taken from  
 90 Rajakumar et al. (2006) with the pre-exponential factor adjusted to be consistent with the preferred rate  
 91 coefficient at 298 K.

92  
 93 **References**

- 94  
 95 Nelson Jr., D. D., Zahniser, M. S., Kolb, C. E., and Magid, H.: J. Phys. Chem., 99, 16301, 1995.  
 96 Rajakumar, B., Portmann, R.W., Burkholder, J. B., and Ravishankara, A. R.: J. Phys. Chem. A, 110,  
 97 6724, 2006.  
 98

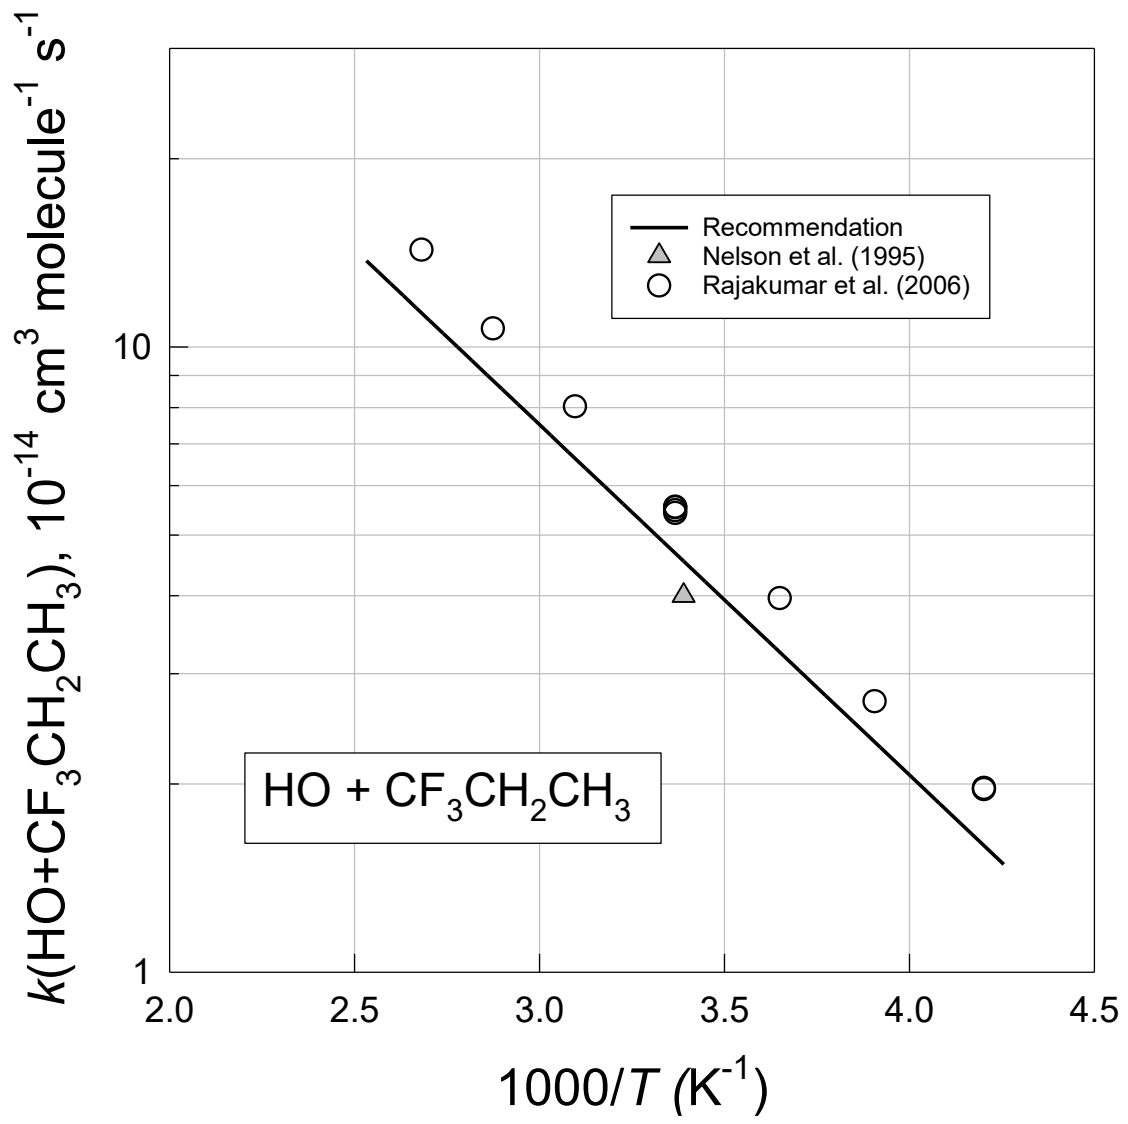

99  
100  
101

102 **oFOx73: HO + CF<sub>3</sub>CHFCH<sub>2</sub>F (HFC-245eb)**  
 103 Last evaluated: June 2025; Last change in preferred values: June 2009.

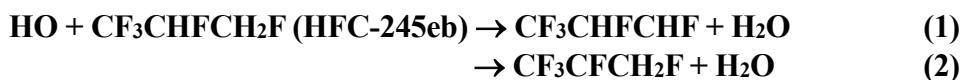

107  
 108 **Rate coefficient data ( $k = k_1 + k_2$ )**  
 109

| $k/\text{cm}^3 \text{ molecule}^{-1} \text{ s}^{-1}$ | $T/\text{K}$ | Reference               | Technique/<br>Comments |
|------------------------------------------------------|--------------|-------------------------|------------------------|
| <i>Absolute Rate Coefficients</i>                    |              |                         |                        |
| $(1.37 \pm 0.03) \times 10^{-14}$                    | 294          | Nelson et al. (1995)    | DF-LIF (a)             |
| $1.23 \times 10^{-12} \exp[-(1250 \pm 40)/T]$        | 238-374      | Rajakumar et al. (2006) | PLP-LIF (b)            |
| $1.80 \times 10^{-14}$                               | 297          |                         |                        |

110  
 111 **Comments**  
 112

- 113 (a) HO radicals produced via the H + NO<sub>2</sub> reaction. Experiments were performed in 1.4-2.9 Torr (1.9-  
 114 3.9 mbar) of helium diluent.  
 115 (b) HO radicals produced by 248 nm photolysis of H<sub>2</sub>O<sub>2</sub>. Experiments were performed in 49-210 Torr  
 116 (65-280 mbar) of helium diluent. The value given at 297 K is the average of the four determinations  
 117 reported.  
 118

119 **Preferred Values**  
 120

| Parameter                                              | Value                               | $T/\text{K}$ |
|--------------------------------------------------------|-------------------------------------|--------------|
| $k / \text{cm}^3 \text{ molecule}^{-1} \text{ s}^{-1}$ | $1.6 \times 10^{-14}$               | 298          |
| $k / \text{cm}^3 \text{ molecule}^{-1} \text{ s}^{-1}$ | $1.1 \times 10^{-12} \exp(-1250/T)$ | 240-380      |
| <i>Reliability</i>                                     |                                     |              |
| $\Delta \log k$                                        | 0.15                                | 298          |
| $\Delta E/R$                                           | $\pm 300$                           | 240-380      |

121  
 122  
 123 **Comments on Preferred Values**

124 The rate coefficient reported by Nelson et al. (1995) at 294 K is approximately 25% below that  
 125 reported by Rajakumar et al. (2006) at 297 K. Adjusting both rate coefficients to values expected at 298  
 126 K using the temperature dependence reported by Rajakumar et al. (2006) reduces the difference between  
 127 the studies to approximately 20%. Such a difference is just within the combined uncertainties from the  
 128 two studies. The preferred value at 298 K is the average of the values derived from Nelson et al. (1995)  
 129 and Rajakumar et al. (2006). The temperature dependence is taken from Rajakumar et al. (2006) with the  
 130 pre-exponential factor adjusted to be consistent with the  $k(298 \text{ K})$  value.  
 131

132  
 133 **References**  
 134

- 135 Nelson Jr., D. D., Zahniser, M. S., Kolb, C. E. and Magid, H.: J. Phys. Chem., 99, 16301, 1995.  
 136 Rajakumar, B., Portmann, R.W., Burkholder, J. B. and Ravishankara, A. R.: J. Phys. Chem. A, 110, 6724,  
 137 2006.  
 138

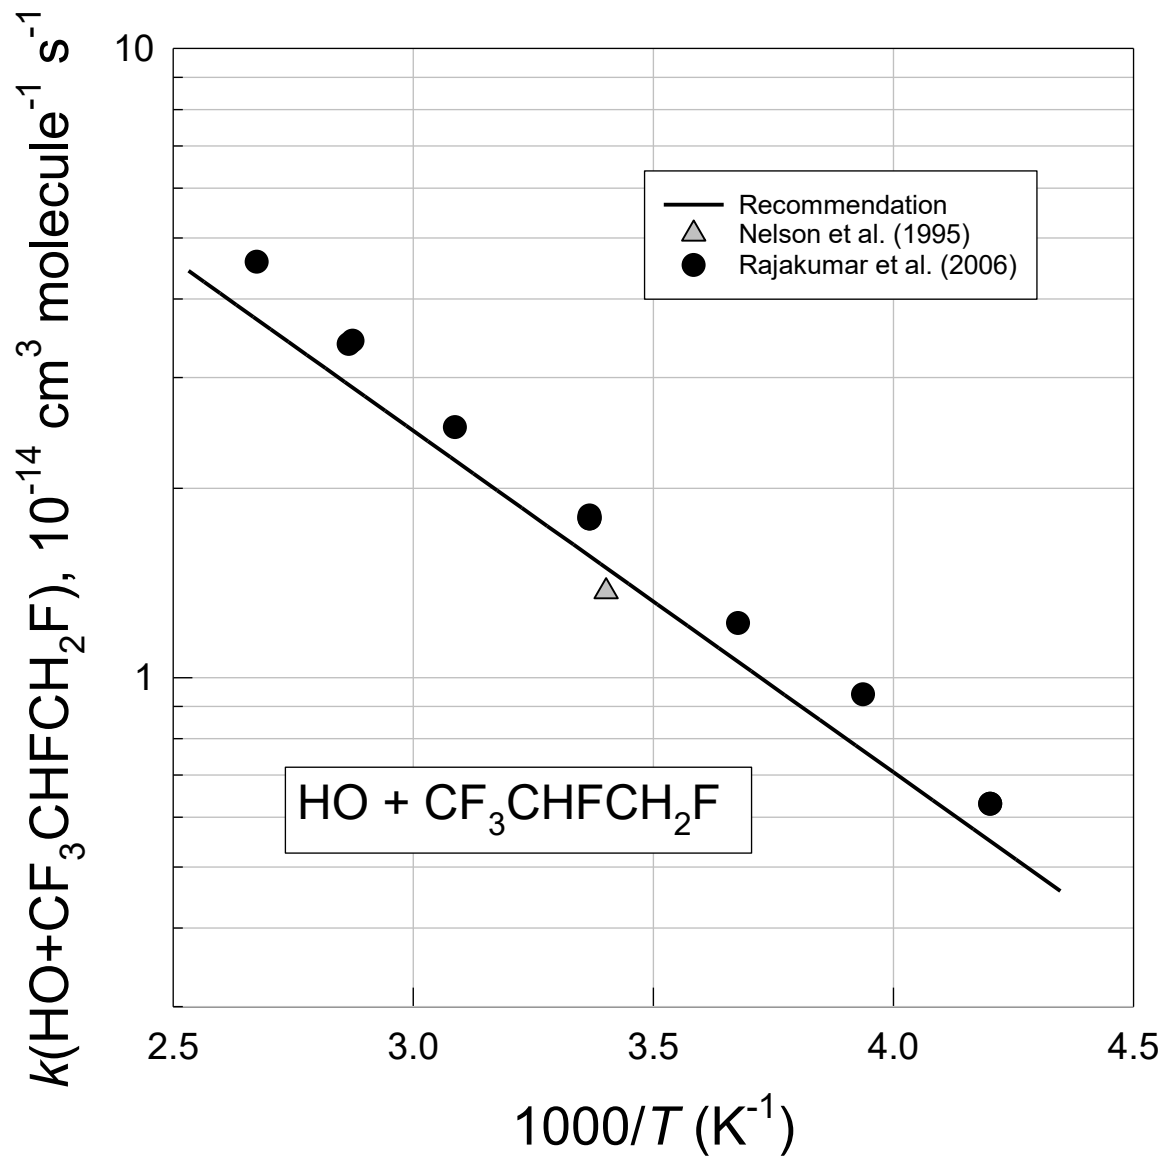

139  
140  
141

142 **oFOx74: HO + CHF<sub>2</sub>CHFCHF<sub>2</sub> (HFC-245ea)**  
 143 Last evaluated: June 2025; Last change in preferred values: June 2009.

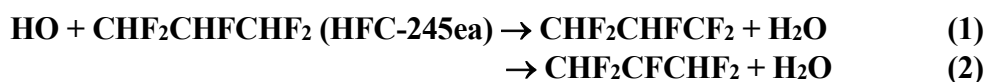

147  
 148 **Rate coefficient data ( $k = k_1 + k_2$ )**  
 149

| $k/\text{cm}^3 \text{ molecule}^{-1} \text{ s}^{-1}$ | $T/\text{K}$ | Reference               | Technique/<br>Comments |
|------------------------------------------------------|--------------|-------------------------|------------------------|
| <i>Absolute Rate Coefficients</i>                    |              |                         |                        |
| $(1.52 \pm 0.15) \times 10^{-14}$                    | 294          | Nelson et al. (1995)    | DF-LIF (a)             |
| $1.91 \times 10^{-12} \exp[-(1375 \pm 100)/T]$       | 238-374      | Rajakumar et al. (2006) | PLP-LIF (b)            |
| $1.93 \times 10^{-14}$                               | 297          |                         |                        |

150  
 151 **Comments**  
 152

- 153 (a) HO radicals were produced via the H + NO<sub>2</sub> reaction. Experiments were performed in 1.2-2.1 Torr  
 154 (1.6-2.9 mbar) of helium diluent.  
 155 (b) HO radicals were produced by 248 nm photolysis of H<sub>2</sub>O<sub>2</sub>. Experiments were performed in 51-205  
 156 Torr (68-270 mbar) of helium diluent. The value given at 297 K is the average of the four  
 157 determinations reported.  
 158

159 **Preferred Values**  
 160

| Parameter                                            | Value                               | $T/\text{K}$ |
|------------------------------------------------------|-------------------------------------|--------------|
| $k/\text{cm}^3 \text{ molecule}^{-1} \text{ s}^{-1}$ | $1.8 \times 10^{-14}$               | 298          |
| $k/\text{cm}^3 \text{ molecule}^{-1} \text{ s}^{-1}$ | $1.8 \times 10^{-12} \exp(-1375/T)$ | 240-380      |
| <i>Reliability</i>                                   |                                     |              |
| $\Delta \log k$                                      | 0.15                                | 298          |
| $\Delta E/R$                                         | $\pm 300$                           | 240-380      |

161  
 162  
 163 **Comments on Preferred Values**

164 The rate coefficient reported by Nelson et al. (1995) at 294 K is approximately 20% below that  
 165 reported by Rajakumar et al. (2006) at 297 K. Adjusting both rate coefficients to values expected at 298  
 166 K using the temperature dependence reported by Rajakumar et al. (2006) reduces the difference between  
 167 the studies to approximately 15%. Such a difference is within the likely combined uncertainties from the  
 168 two studies. The preferred value at 298 K is the average of the values derived from Nelson et al. (1995)  
 169 and Rajakumar et al. (2006). The temperature dependence is taken from Rajakumar et al. (2006) with the  
 170 pre-exponential factor adjusted to be consistent with the  $k(298 \text{ K})$  value.  
 171  
 172

173 **References**  
 174

- 175 Nelson Jr., D. D., Zahniser, M. S., Kolb, C. E., and Magid, H.: J. Phys. Chem., 99, 16301, 1995.  
 176 Rajakumar, B., Portmann, R.W., Burkholder, J. B., and Ravishankara, A. R.: J. Phys. Chem. A, 110,  
 177 6724, 2006.  
 178

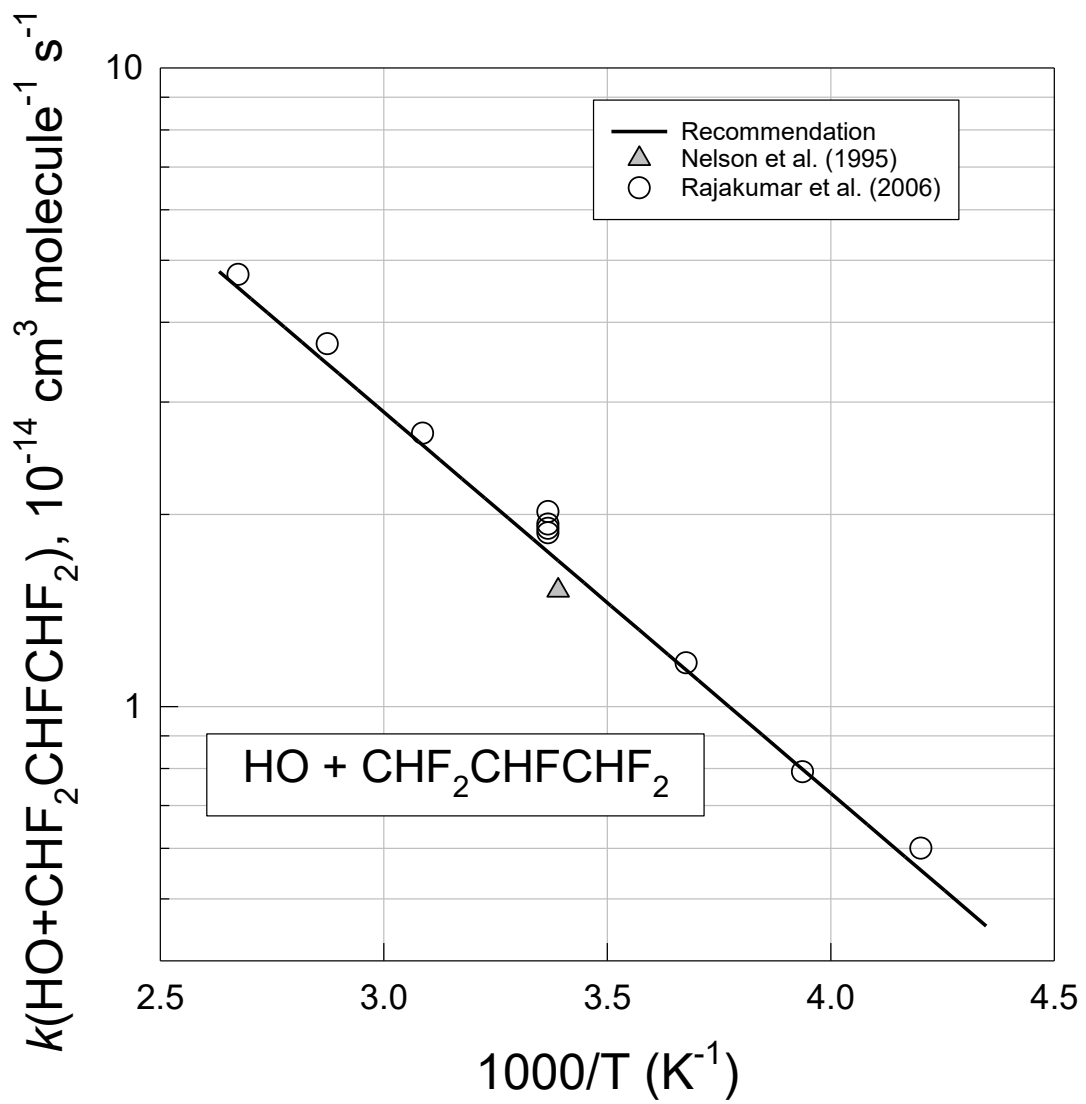

179  
 180  
 181  
 182  
 183

184 **oFOx75: HO + CF<sub>3</sub>CH<sub>2</sub>CHF<sub>2</sub> (HFC-245fa)**  
 185 Last evaluated: June 2025; Last change in preferred values: June 2009.

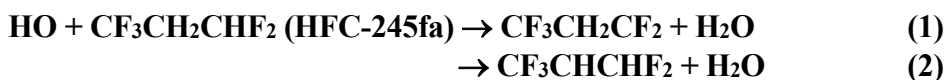

189 **Rate coefficient data ( $k = k_1 + k_2$ )**  
 190  
 191

| $k/\text{cm}^3 \text{ molecule}^{-1} \text{ s}^{-1}$ | $T/\text{K}$ | Reference            | Technique/<br>Comments |
|------------------------------------------------------|--------------|----------------------|------------------------|
| <i>Absolute Rate Coefficients</i>                    |              |                      |                        |
| $(6.12 \pm 0.22) \times 10^{-15}$                    | 294          | Nelson et al. (1995) | DF-LIF (a)             |
| $6.32 \times 10^{-12} \exp[-(1331 \pm 43)/T]$        | 273-370      | Orkin et al. (1996)  | FP-RF (b)              |
| $(7.24 \pm 0.02) \times 10^{-15}$                    | 298          |                      |                        |

192 **Comments**

- 193  
 194 (a) HO radicals produced via the H + NO<sub>2</sub> reaction. Experiments were performed in 2.2-3.1 Torr (0.3-  
 195 0.4 kPa) of helium diluent.  
 196 (b) HO radicals were produced from the photolysis of H<sub>2</sub>O vapor using a xenon flash lamp. HO radicals  
 197 were monitored by their resonance fluorescence near 308 nm using microwave discharge resonance  
 198 lamp. Experiments were performed in 100 Torr (13.33 kPa) of argon diluent.  
 199

200 **Preferred Values**  
 201

| Parameter                                            | Value                               | $T/\text{K}$ |
|------------------------------------------------------|-------------------------------------|--------------|
| $k/\text{cm}^3 \text{ molecule}^{-1} \text{ s}^{-1}$ | $6.9 \times 10^{-15}$               | 298          |
| $k/\text{cm}^3 \text{ molecule}^{-1} \text{ s}^{-1}$ | $6.0 \times 10^{-13} \exp(-1331/T)$ | 270-370      |
| <i>Reliability</i>                                   |                                     |              |
| $\Delta \log k$                                      | $\pm 0.12$                          | 298          |
| $\Delta E/R$                                         | $\pm 300$                           | 270-370      |

202  
 203 *Comments on Preferred Values*

204  
 205 Adjusting the rate coefficient at 294 K reported by Nelson et al. (1995) to the value expected at 298  
 206 K using the temperature dependence reported by Orkin et al. (1996) gives  $k(298\text{K}) = 6.50 \times 10^{-15} \text{ cm}^3$   
 207  $\text{molecule}^{-1} \text{ s}^{-1}$  which is 10% below the  $k(298\text{K})$  value reported by Orkin et al. (1996). Such a difference is  
 208 well within the combined uncertainties from the two studies. The preferred value at 298 K is the average  
 209 of the values from Nelson et al. (1995) and Orkin et al. (1996). The temperature dependence is taken  
 210 from Orkin et al. (1996) with the pre-exponential factor adjusted to be consistent with the  $k(298\text{K})$  value.  
 211  
 212

213 **References**

- 214  
 215  
 216 Nelson Jr., D. D., Zahniser, M. S., Kolb, C. E., and Magid, H.: J. Phys. Chem., 99, 16301, 1995.  
 217 Orkin, V. L., Huie, R. E., and Kurylo, M. J.: J. Phys. Chem., 100, 8907, 1996.  
 218  
 219

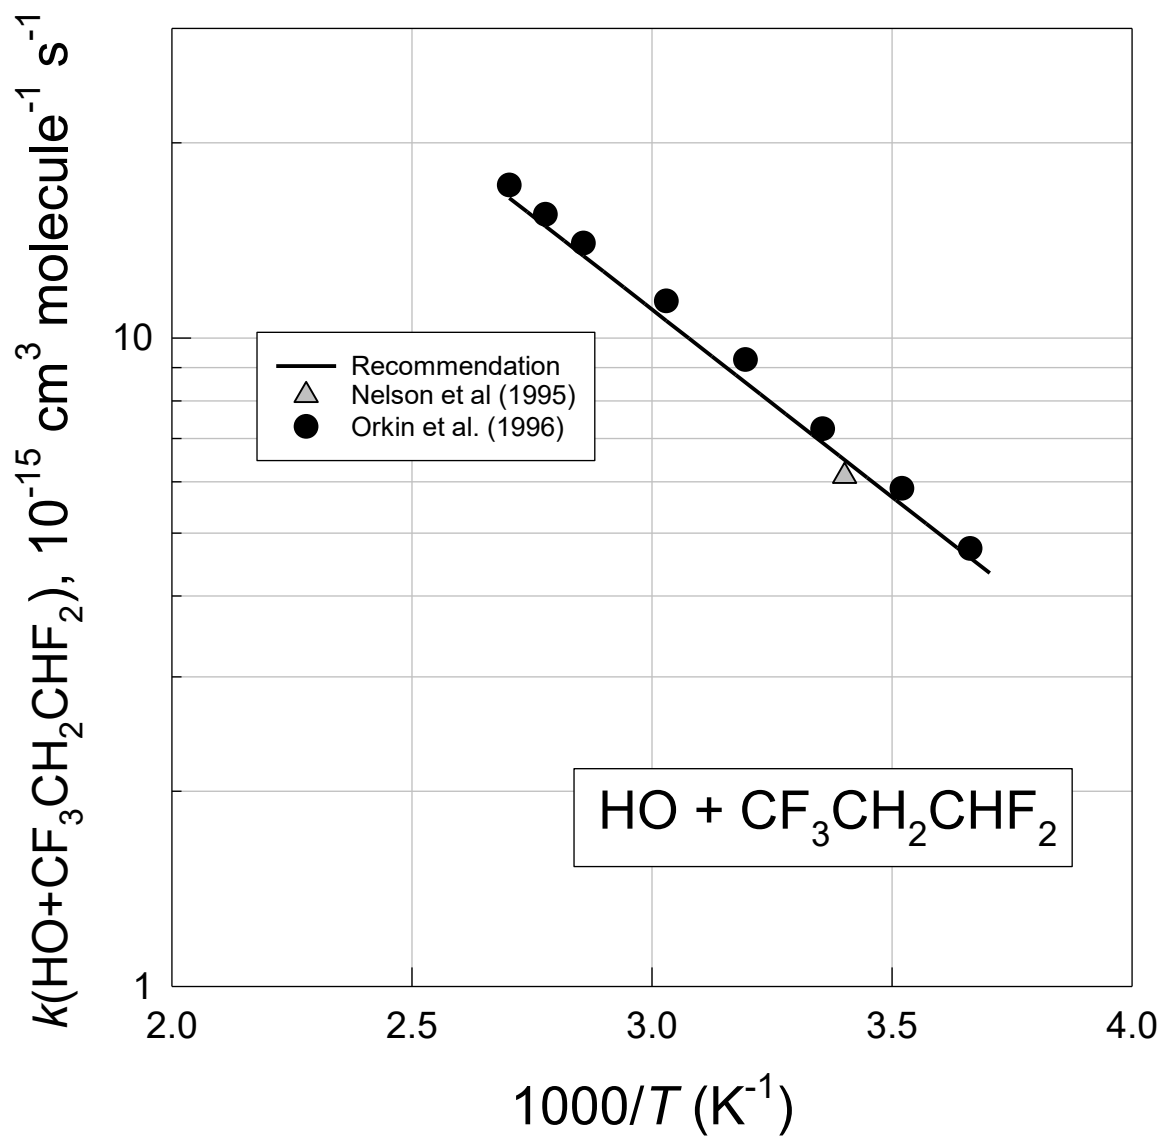

220  
 221  
 222  
 223

224 **oFOx76: HO + CF<sub>3</sub>CH<sub>2</sub>CF<sub>2</sub>CH<sub>3</sub> (HFC-365mfc)**  
 225 Last evaluated: June 2025; Last change in preferred values: June 2009.

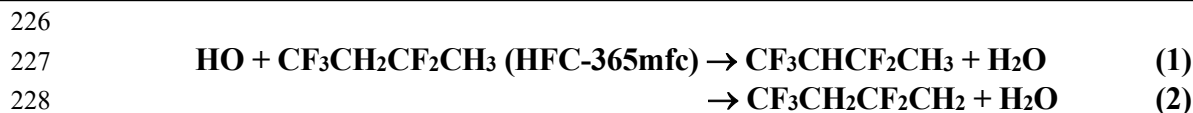

229  
 230 **Rate coefficient data ( $k = k_1 + k_2$ )**  
 231

| $k/\text{cm}^3 \text{ molecule}^{-1} \text{ s}^{-1}$ | $T/\text{K}$ | Reference              | Technique/<br>Comments |
|------------------------------------------------------|--------------|------------------------|------------------------|
| <i>Absolute Rate Coefficients</i>                    |              |                        |                        |
| $1.68 \times 10^{-12} \exp[-(1585 \pm 80)/T]$        | 269-370      | Mellouki et al. (1995) | PLP-LIF (a)            |
| $8.69 \times 10^{-15}$                               | 298          |                        |                        |
| <i>Relative Rate Coefficients</i>                    |              |                        |                        |
| $1.39 \times 10^{-12} \exp[-1651/T]$                 | 278-323      | Barry et al. (1997)    | RR (b)                 |
| $5.46 \times 10^{-15}$                               | 298          |                        |                        |

232  
 233 **Comments**

- 234  
 235 (a) HO radicals were produced by the 248 nm photolysis of H<sub>2</sub>O<sub>2</sub>. Experiments were performed in 100  
 236 Torr (133 mbar) of helium diluent.  
 237 (b) HO radicals were produced by the 254 nm photolysis of O<sub>3</sub> in the presence of H<sub>2</sub>O. Experiments  
 238 were performed in 1 bar of air diluent. Rate coefficient ratios were placed on an absolute basis using  
 239  $k(\text{OH}+\text{CH}_3\text{CCl}_3) = 1.2 \times 10^{-12} \exp(-1440/T) \text{ cm}^3 \text{ molecule}^{-1} \text{ s}^{-1}$  (Atkinson et al., 2008).  
 240

241 **Preferred Values**  
 242

| Parameter                                            | Value                               | $T/\text{K}$ |
|------------------------------------------------------|-------------------------------------|--------------|
| $k/\text{cm}^3 \text{ molecule}^{-1} \text{ s}^{-1}$ | $7.1 \times 10^{-15}$               | 298          |
| $k/\text{cm}^3 \text{ molecule}^{-1} \text{ s}^{-1}$ | $1.6 \times 10^{-12} \exp(-1620/T)$ | 270-380      |
| <i>Reliability</i>                                   |                                     |              |
| $\Delta \log k$                                      | 0.2                                 | 298          |
| $\Delta E/R$                                         | $\pm 200$                           | 270-380      |

243  
 244  
 245 *Comments on Preferred Values*

246  
 247  
 248 The rate coefficient at 298 K reported in the absolute rate study by Mellouki et al. (1995) is  
 249 approximately 60% greater than that measured in the relative rate study by Barry et al. (1997). A possible  
 250 explanation for this discrepancy is the presence of reactive impurities in the sample used by Mellouki et  
 251 al. (1995). This explanation should lead to an increasing discrepancy between the two studies with  
 252 decreasing temperature, but no such trend is evident. The temperature dependencies of the rate  
 253 coefficients reported in the two studies are in good agreement. There being no obvious reason to prefer  
 254 either study, we prefer an average of the  $k(298\text{K})$  values and temperature dependencies from the two  
 255 studies with the pre-exponential A factor chosen for consistency with the  $k(298\text{K})$ . As discussed by Barry  
 256 et al. (1997) and Inoue et al. (2008), the OH radical initiated atmospheric oxidation of CF<sub>3</sub>CH<sub>2</sub>CF<sub>2</sub>CH<sub>3</sub> is  
 257 expected to lead to the formation of CF<sub>3</sub>CH<sub>2</sub>CF<sub>2</sub>CHO as the main primary product. Oxidation of  
 258 CF<sub>3</sub>CH<sub>2</sub>CF<sub>2</sub>CHO will generate CF<sub>3</sub>CHO and COF<sub>2</sub> as secondary products. Oxidation of CF<sub>3</sub>CHO will  
 259 produce COF<sub>2</sub>.  
 260

261  
262  
263  
264  
265  
266  
267  
268  
269  
270  
271

## References

- Atkinson, R., Baulch, D. L., Cox, R. A., Crowley, J. N., Hampson, R. F., Hynes, R. G., Jenkin, M. E., Rossi, M. J., Troe, J., and Wallington, T. J.: *Atmos. Chem. Phys.*, 8, 4141, 2008.
- Barry, J., Locke, G., Scollard, D., Sidebottom, H. W., Treacy, J., Clerbaux, C., Colin, R., and Franklin, J.: *Int. J. Chem.*, 29, 607, 1997.
- Inoue, Y., Kawasaki, M., Wallington, T. J., and Hurley M. D.: *Chem. Phys. Lett.*, 462, 164, 2008.
- Mellouki, A., Téton, S., and Le Bras, G.: *Geophys. Res. Lett.*, 22, 389, 1995.

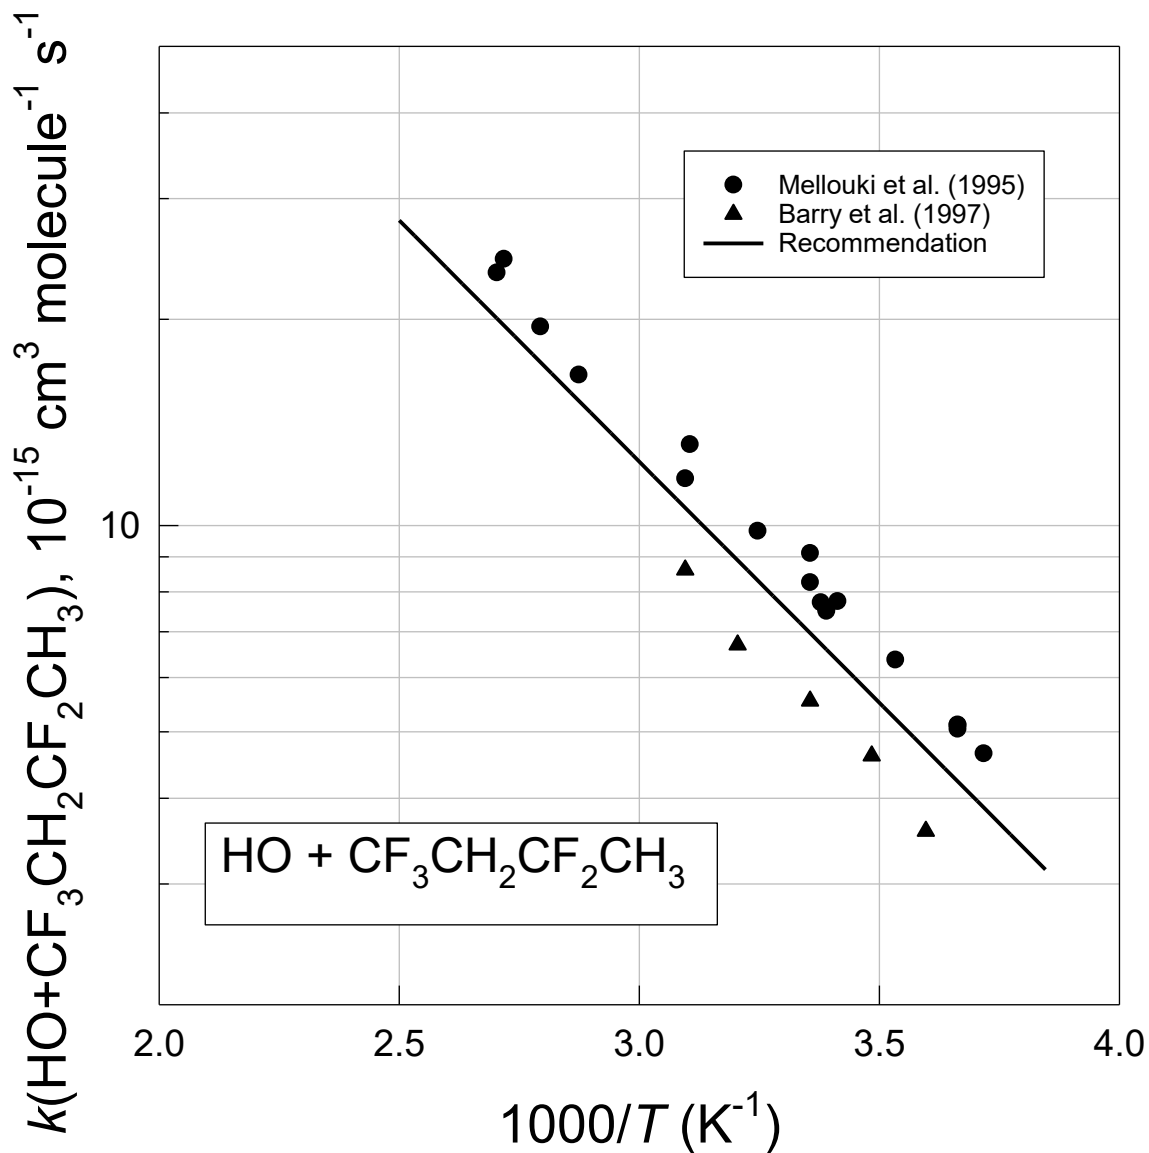

272  
273  
274

275 **oFOx77: HO + CF<sub>3</sub>CH<sub>2</sub>CH<sub>2</sub>CF<sub>3</sub> (HFC-356mff)**  
 276 Last evaluated: June 2025; Last change in preferred values: June 2009.

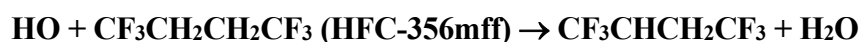

279 **Rate coefficient data (*k*)**

| <i>k</i> /cm <sup>3</sup> molecule <sup>-1</sup> s <sup>-1</sup> | <i>T</i> /K | Reference            | Technique/<br>Comments |
|------------------------------------------------------------------|-------------|----------------------|------------------------|
| <i>Absolute Rate Coefficients</i>                                |             |                      |                        |
| 2.94 × 10 <sup>-12</sup> exp[-(1734 ± 87)/ <i>T</i> ]            | 260-365     | Zhang et al. (1994)  | FP-RF (a)              |
| (8.17±1.04) × 10 <sup>-15</sup>                                  | 296         |                      |                        |
| (6.73±0.14) × 10 <sup>-15</sup>                                  | 296         | Nelson et al. (1995) | DF-LIF (b)             |

283 **Comments**

- 284 (a) HO radicals were produced by photolysis of H<sub>2</sub>O using a xenon flash lamp at λ >165 nm.  
 285 Experiments were performed in 35 Torr (47 mbar) of argon diluent.  
 286 (b) HO radicals were produced by the reaction of H atoms with NO<sub>2</sub>. Experiments were performed in  
 287 2.0 Torr (2.7 mbar) of helium diluent.  
 288  
 289

290 **Preferred Values**

| Parameter                                                        | Value                                         | <i>T</i> /K |
|------------------------------------------------------------------|-----------------------------------------------|-------------|
| <i>k</i> /cm <sup>3</sup> molecule <sup>-1</sup> s <sup>-1</sup> | 7.8 × 10 <sup>-15</sup>                       | 298         |
| <i>k</i> /cm <sup>3</sup> molecule <sup>-1</sup> s <sup>-1</sup> | 2.6 × 10 <sup>-12</sup> exp(-1734/ <i>T</i> ) | 260-370     |
| <i>Reliability</i>                                               |                                               |             |
| Δ log <i>k</i>                                                   | 0.10                                          | 298         |
| Δ E/R                                                            | ± 300                                         | 260-370     |

295 **Comments on Preferred Values**

296 There is good agreement in the rate coefficients reported by Zhang et al. (1994) and Nelson et al.  
 297 (1995) at 296 K. Adjusting these rate coefficients to 298 K using the temperature dependence reported by  
 298 Zhang et al. (1994) and taking an average gives our preferred rate coefficient at 298 K. Taking the  
 299 temperature dependence reported by Zhang et al. (1994) and choosing a pre-exponential factor to be  
 300 consistent with the rate coefficient at 298 K gives the preferred Arrhenius expression.  
 301  
 302

303 **References**

- 304 Nelson Jr., D. D., Zahniser, M. S, Kolb, C. E, and Magid, H.: J. Phys. Chem., 99 16301, 1995.  
 305 Zhang, Z., Padmaja, S., Saini, R. D., Huie, R. E., and Kurylo, M. J.: J. Phys. Chem., 98, 4312, 1994.  
 306  
 307  
 308  
 309

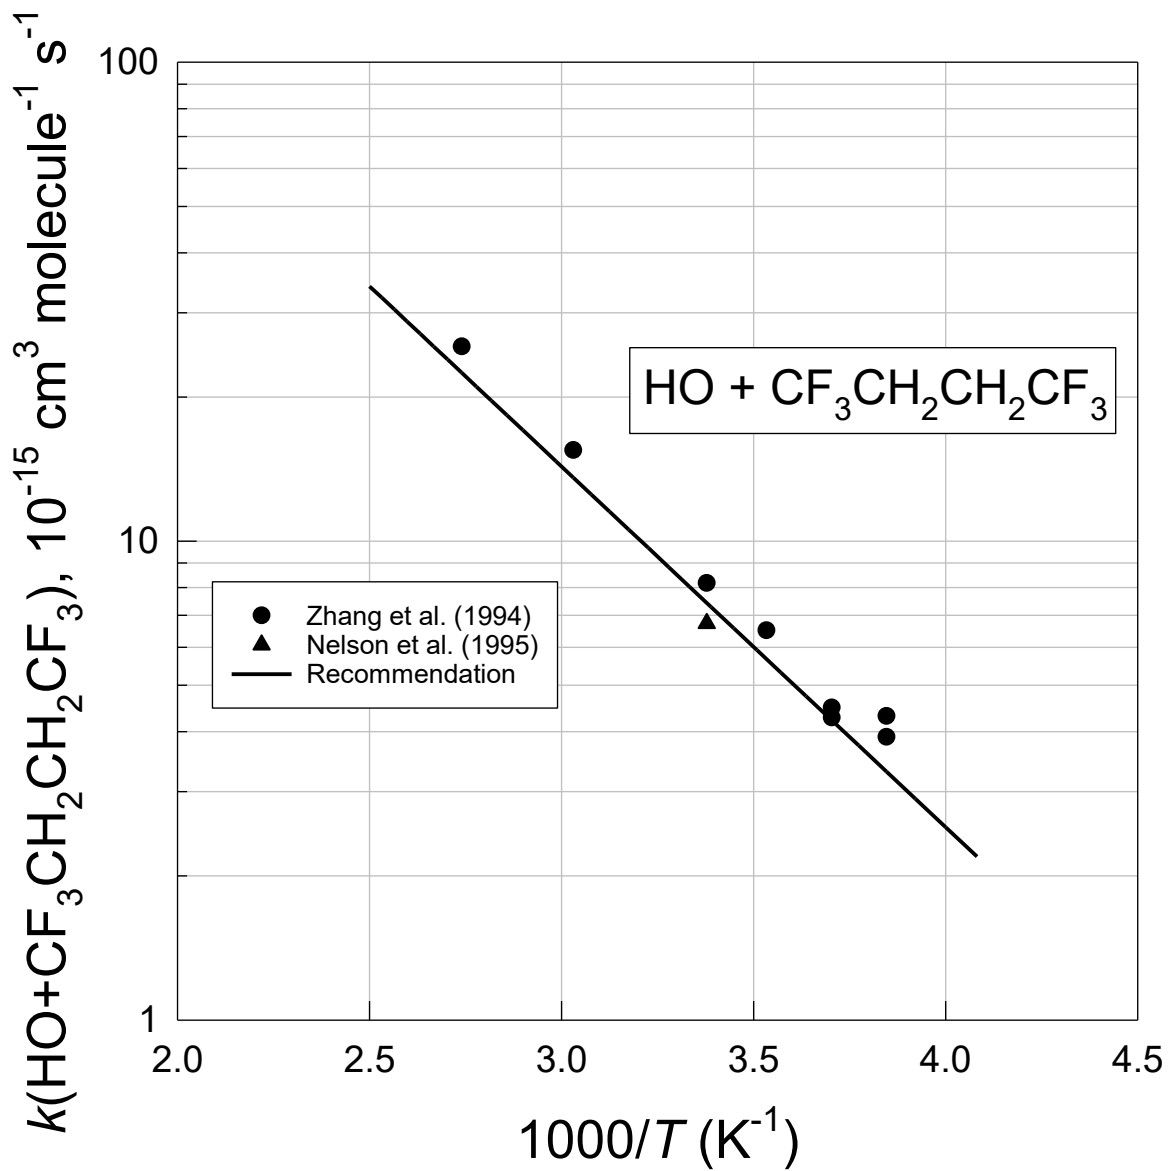

310  
311  
312

313 **oFOx78: HO + CF<sub>3</sub>CF<sub>2</sub>CH<sub>2</sub>CH<sub>2</sub>F (HFC-356mcf)**  
 314 Last evaluated: June 2025; Last change in preferred values: June 2009.

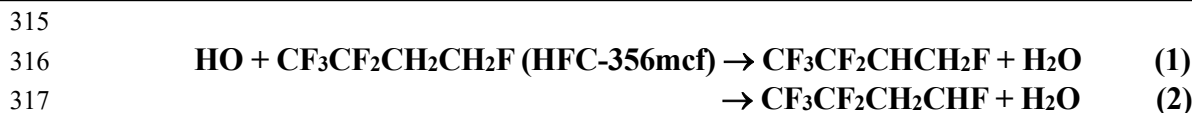

318  
 319 **Rate coefficient data ( $k = k_1 + k_2$ )**

| $k/\text{cm}^3 \text{ molecule}^{-1} \text{ s}^{-1}$ | $T/\text{K}$ | Reference            | Technique/<br>Comments |
|------------------------------------------------------|--------------|----------------------|------------------------|
| <i>Absolute Rate Coefficients</i>                    |              |                      |                        |
| $1.74 \times 10^{-12} \exp[-(1108 \pm 120)/T]$       | 252-366      | Nelson et al. (1995) | DF-LIF (a)             |
| $(4.05 \pm 0.23) \times 10^{-14}$                    | 295          |                      |                        |

321  
 322 **Comments**

323  
 324 (a) HO radicals were produced by the reaction of H atoms with NO<sub>2</sub>. Experiments were performed in  
 325 1.5-3.0 Torr (2-4 mbar) of helium diluent.

326  
 327 **Preferred Values**

| Parameter                                            | Value                               | $T/\text{K}$ |
|------------------------------------------------------|-------------------------------------|--------------|
| $k/\text{cm}^3 \text{ molecule}^{-1} \text{ s}^{-1}$ | $4.2 \times 10^{-14}$               | 298          |
| $k/\text{cm}^3 \text{ molecule}^{-1} \text{ s}^{-1}$ | $1.7 \times 10^{-12} \exp(-1108/T)$ | 250-370      |
| <i>Reliability</i>                                   |                                     |              |
| $\Delta \log k$                                      | 0.15                                | 298          |
| $\Delta E/R$                                         | $\pm 300$                           | 250-370      |

331  
 332 *Comments on Preferred Values*

333  
 334 The preferred values are based on the results from the study by Nelson et al. (1995).

335  
 336 **References**

337  
 338 Nelson Jr., D. D., Zahniser, M. S, Kolb, C. E, and Magid, H.: J. Phys. Chem., 99, 16301, 1995.  
 339

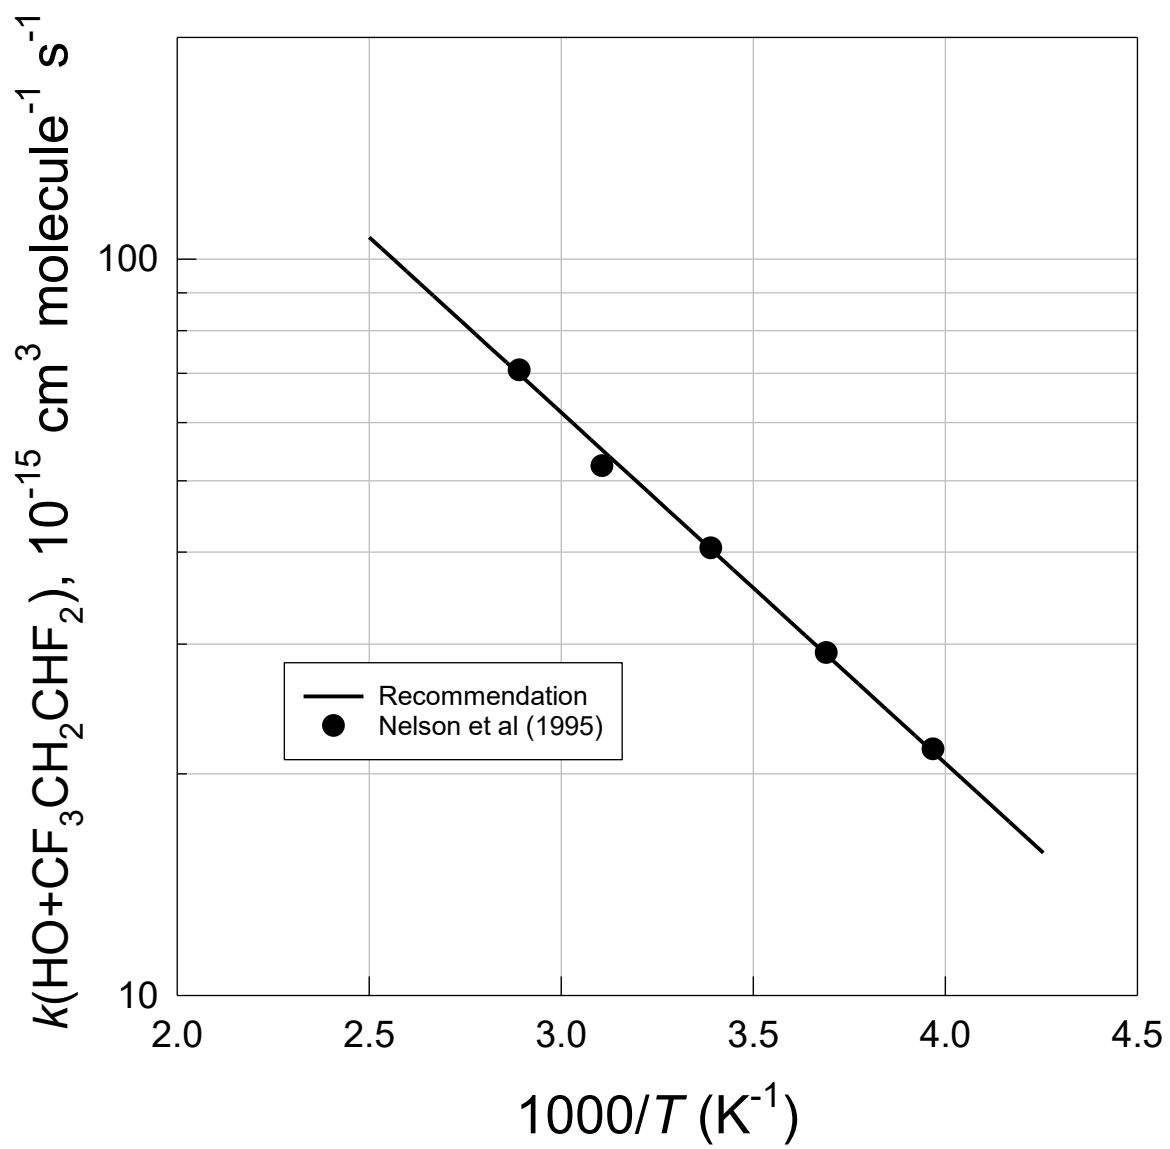

340  
341  
342  
343  
344

345 **oFOx79: HO + CHF<sub>2</sub>CF<sub>2</sub>CF<sub>2</sub>CHF<sub>2</sub> (HFC-338pcc)**  
 346 Last evaluated: June 2025; Last change in preferred values: June 2009.

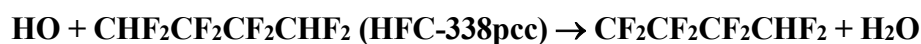

350 **Rate coefficient data (*k*)**  
 351

| <i>k</i> /cm <sup>3</sup> molecule <sup>-1</sup> s <sup>-1</sup>                         | <i>T</i> /K    | Reference                | Technique/ Comments |
|------------------------------------------------------------------------------------------|----------------|--------------------------|---------------------|
| <i>Absolute Rate Coefficients</i>                                                        |                |                          |                     |
| 7.8 × 10 <sup>-13</sup> exp[-(1510±260)/ <i>T</i> ]<br>(4.18 ± 0.30) × 10 <sup>-15</sup> | 245-419<br>296 | Zhang et al. (1992)      | FP-RF (a)           |
| 7.71 × 10 <sup>-13</sup> exp[-(1550±60)/ <i>T</i> ]<br>(3.87 ± 0.27) × 10 <sup>-15</sup> | 232-378<br>297 | Schmoltner et al. (1993) | FP/PLP-LIF (b)      |

352  
 353 **Comments**  
 354

- 355 (a) HO radicals were produced by the flash photolysis ( $\lambda \geq 165$  nm) of H<sub>2</sub>O in 35 Torr (47 mbar) of  
 356 argon diluent.  
 357 (b) HO radicals were produced by the flash photolysis (185 nm  $\geq \lambda \geq 165$  nm) of H<sub>2</sub>O and pulsed laser  
 358 photolysis ( $\lambda = 355$  nm) of HONO.  
 359

360 **Preferred Values**

| Parameter                                                        | Value                                                                     | <i>T</i> /K    |
|------------------------------------------------------------------|---------------------------------------------------------------------------|----------------|
| <i>k</i> /cm <sup>3</sup> molecule <sup>-1</sup> s <sup>-1</sup> | 4.3 × 10 <sup>-15</sup><br>7.82 × 10 <sup>-13</sup> exp(-1548/ <i>T</i> ) | 298<br>230-420 |
| <i>Reliability</i>                                               |                                                                           |                |
| Δ log <i>k</i>                                                   | 0.08                                                                      | 298            |
| Δ E/R                                                            | ± 200                                                                     | 230-420        |

363 *Comments on Preferred Values*  
 364  
 365

366 The results of the two studies are in good agreement. A fit of the Arrhenius expression to the  
 367 combined data set from the two studies gives  $k(\text{OH}+\text{CHF}_2\text{CF}_2\text{CF}_2\text{CHF}_2) = 7.82 \times 10^{-13} \exp(-1548/T)$   
 368 cm<sup>3</sup> molecule<sup>-1</sup> s<sup>-1</sup>. This expression gives  $k(\text{OH}+\text{CHF}_2\text{CF}_2\text{CF}_2\text{CHF}_2) = 4.34 \times 10^{-15}$  cm<sup>3</sup> molecule<sup>-1</sup> s<sup>-1</sup>  
 369 at 298 K.  
 370

371 **References**  
 372

- 373 Zhang, Z., Saini, R. D., Kurylo, M. J., and Huie, R. E.: Chem. Phys. Lett., 200, 230, 1992.  
 374 Schmoltner, A. M., Talukdar, R. K., Warren, R. F., Mellouki, A., Goldfarb, L., Gierczak, T., McKeen, S.  
 375 A., and Ravishankara, A. R.: J. Phys. Chem., 97, 8976, 1993.

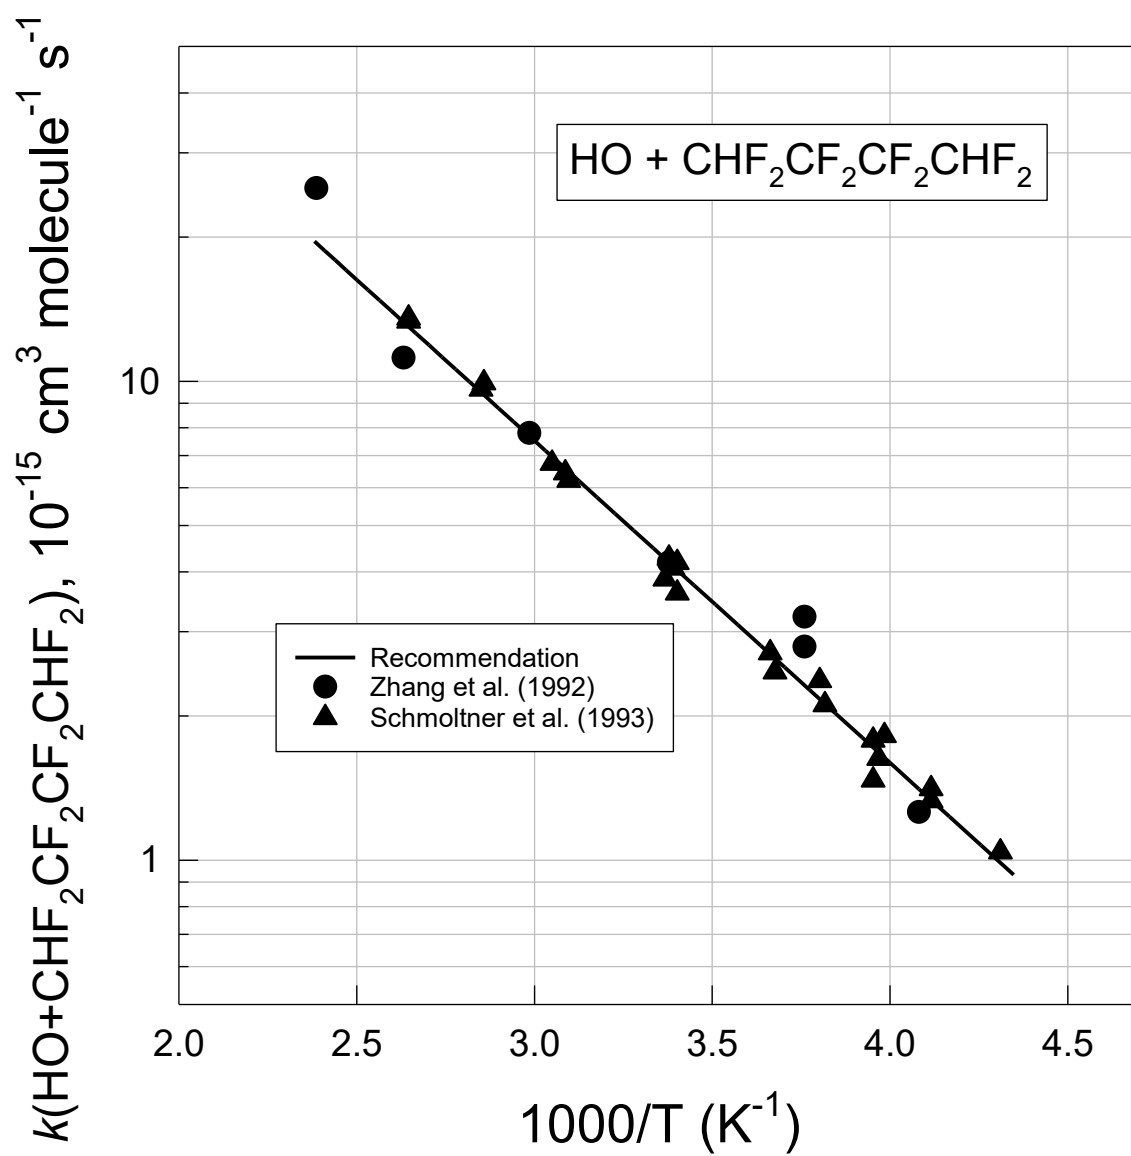

376  
377  
378  
379

380 **oFOx80: HO + CF<sub>3</sub>CH<sub>2</sub>CF<sub>2</sub>CH<sub>2</sub>CF<sub>3</sub> (HFC-458mfcf)**  
381 Last evaluated: June 2025; Last change in preferred values: June 2009.

382

383 **HO + CF<sub>3</sub>CH<sub>2</sub>CF<sub>2</sub>CH<sub>2</sub>CF<sub>3</sub> (HFC-458mfcf) → CF<sub>3</sub>CHCF<sub>2</sub>CH<sub>2</sub>CF<sub>3</sub> + H<sub>2</sub>O**

384

385 **Rate coefficient data (*k*)**

386

| <i>k</i> /cm <sup>3</sup> molecule <sup>-1</sup> s <sup>-1</sup> | <i>T</i> /K | Reference            | Technique/ Comments |
|------------------------------------------------------------------|-------------|----------------------|---------------------|
| <i>Absolute Rate Coefficients</i>                                |             |                      |                     |
| 1.23 × 10 <sup>-12</sup> exp[-1833/ <i>T</i> ]                   | 278-354     | Nelson et al. (1995) | FP-RF (a)           |
| (2.55 ± 0.15) × 10 <sup>-15</sup>                                | 298         |                      |                     |

387

388

389

### Comments

390 (a) HO radicals were produced by the reaction of H atoms with NO<sub>2</sub>. Experiments were  
391 performed in 0.8-6.4 Torr (1.1-8.5 mbar) of helium diluent.

392

393

394

### Preferred Values

| Parameter                                                        | Value                                          | <i>T</i> /K |
|------------------------------------------------------------------|------------------------------------------------|-------------|
| <i>k</i> /cm <sup>3</sup> molecule <sup>-1</sup> s <sup>-1</sup> | 2.6 × 10 <sup>-15</sup>                        | 298         |
|                                                                  | 1.23 × 10 <sup>-12</sup> exp(-1833/ <i>T</i> ) | 270-360     |
| <i>Reliability</i>                                               |                                                |             |
| Δ log <i>k</i>                                                   | 0.15                                           | 298         |
| Δ <i>E</i> / <i>R</i>                                            | ± 300                                          | 270-360     |

397

398

399

### Comments on Preferred Values

400

401

402

The Arrhenius expression from Nelson et al. (1995),  $k(\text{HO}+\text{CF}_3\text{CH}_2\text{CF}_2\text{CH}_2\text{CF}_3) = 1.23 \times 10^{-12} \exp(-1833/T) \text{ cm}^3 \text{ molecule}^{-1} \text{ s}^{-1}$  is adopted. This expression gives  $k(\text{HO}+\text{CF}_3\text{CH}_2\text{CF}_2\text{CH}_2\text{CF}_3) = 2.6 \times 10^{-15} \text{ cm}^3 \text{ molecule}^{-1} \text{ s}^{-1}$  at 298 K.

403

404

405

406

### References

Nelson Jr., D. D., Zahniser, M. S, Kolb, C. E, and Magid, H.: J. Phys. Chem., 99 16301, 1995.

$k(\text{HO} + \text{CF}_3\text{CH}_2\text{CF}_2\text{CH}_2\text{CF}_3), 10^{-15} \text{ cm}^3 \text{ molecule}^{-1} \text{ s}^{-1}$

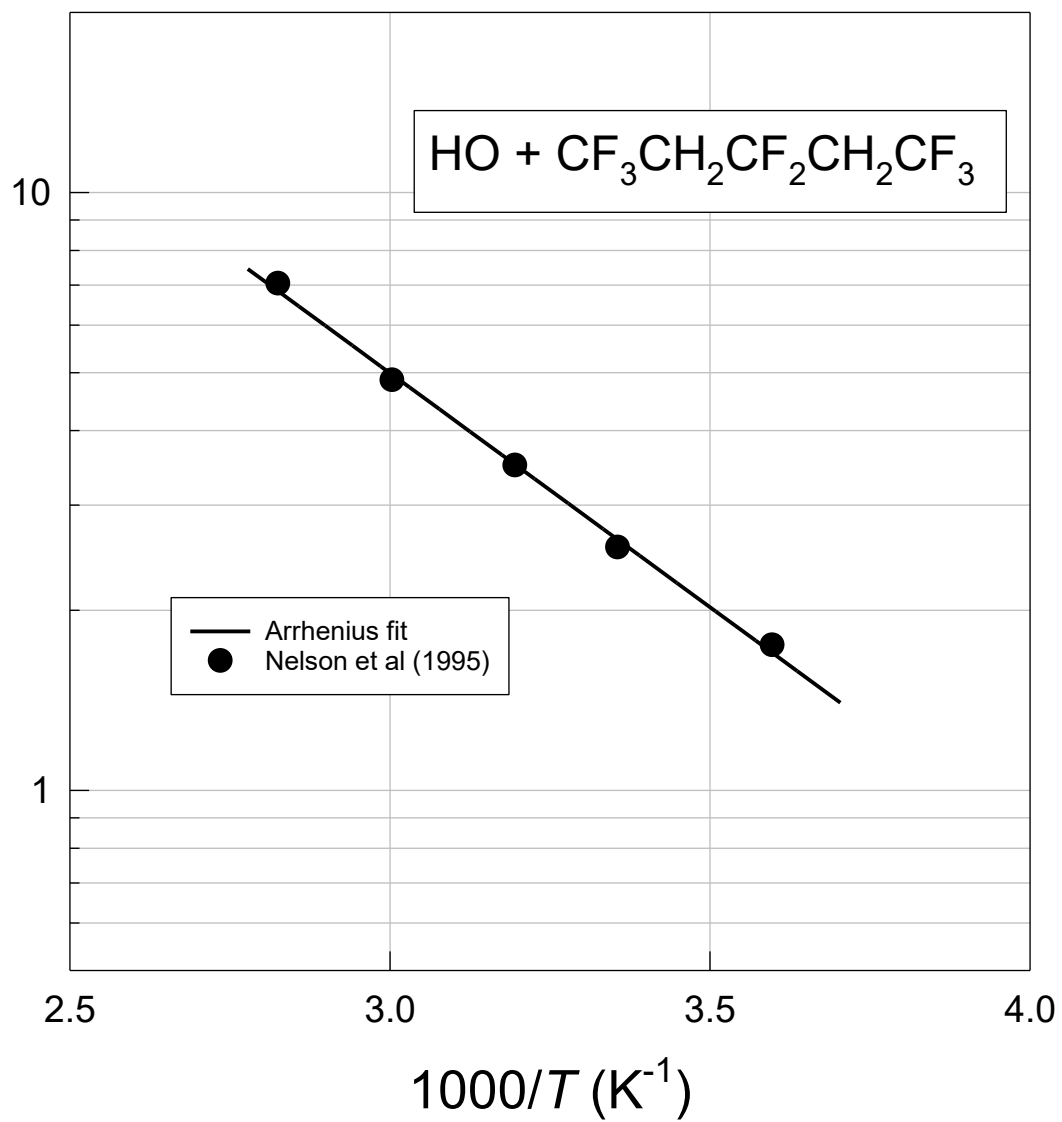

407  
408

409 **oFOx81: HO + CF<sub>3</sub>CHFCHFCF<sub>2</sub>CF<sub>3</sub> (HFC-43-10mee)**  
 410 Last evaluated: June 2025; Last change in preferred values: June 2009.

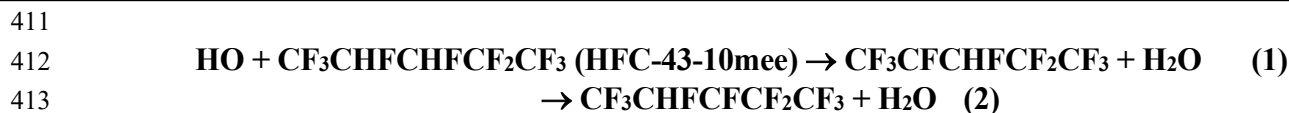

414  
 415 **Rate coefficient data ( $k = k_1 + k_2$ )**  
 416

| $k/\text{cm}^3 \text{ molecule}^{-1} \text{ s}^{-1}$ | $T/\text{K}$ | Reference                | Technique/ Comments |
|------------------------------------------------------|--------------|--------------------------|---------------------|
| <i>Absolute Rate Coefficients</i>                    |              |                          |                     |
| $4.21 \times 10^{-13} \exp[-(1400 \pm 180)/T]$       | 250-400      | Zhang et al. (1992)      | FP-RF (a)           |
| $(3.87 \pm 0.38) \times 10^{-15}$                    | 295          |                          |                     |
| $6.46 \times 10^{-13} \exp[-(1600 \pm 50)/T]$        | 251.5-375    | Schmoltner et al. (1993) | FP-LIF (b)          |
| $(2.88 \pm 0.20) \times 10^{-15}$                    | 296          |                          |                     |

417  
 418 **Comments**

- 419  
 420 (a) HO radicals were produced by the flash photolysis ( $\lambda \geq 165 \text{ nm}$ ) of H<sub>2</sub>O in 35 Torr (47 mbar)  
 421 of argon diluent.  
 422 (b) HO radicals were produced by the flash photolysis ( $185 \text{ nm} \geq \lambda \geq 165 \text{ nm}$ ) of H<sub>2</sub>O.

423  
 424 **Preferred Values**  
 425

| Parameter                                              | Value                                | $T/\text{K}$ |
|--------------------------------------------------------|--------------------------------------|--------------|
| $k / \text{cm}^3 \text{ molecule}^{-1} \text{ s}^{-1}$ | $3.3 \times 10^{-15}$                | 298          |
| $k / \text{cm}^3 \text{ molecule}^{-1} \text{ s}^{-1}$ | $5.68 \times 10^{-13} \exp(-1534/T)$ | 240-400      |
| <i>Reliability</i>                                     |                                      |              |
| $\Delta \log k$                                        | 0.12                                 | 298          |
| $\Delta E/R$                                           | $\pm 300$                            | 240-400      |

426  
 427  
 428 **Comments on Preferred Values**

429  
 430  
 431 The rate coefficients measured by Schmoltner et al. (1993) are approximately 20% lower than,  
 432 but consistent with the experimental uncertainties with, those reported by Zhang et al. (1992). The  
 433 temperature dependence of the rate coefficients reported by Schmoltner et al. (1993) and Zhang et  
 434 al. (1992) are in good agreement. There being no obvious reason to prefer either study we have fit  
 435 the Arrhenius expression to the combined data set from Zhang et al. (1992) and Schmoltner et al.  
 436 (1993) to give the preferred expression.

437  
 438 **References**

- 439  
 440 Zhang, Z., Saini, R.D., Kurylo, M. J., and Huie, R. E.: Chem. Phys. Lett., 200, 230, 1992.  
 441 Schmoltner, A. M., Talukdar, R. K., Warren, R. F., Mellouki, A., Goldfarb, L., Gierczak, T.,  
 442 McKeen, S. A., and Ravishankara, A. R.: J. Phys. Chem., 97, 8976, 1993.

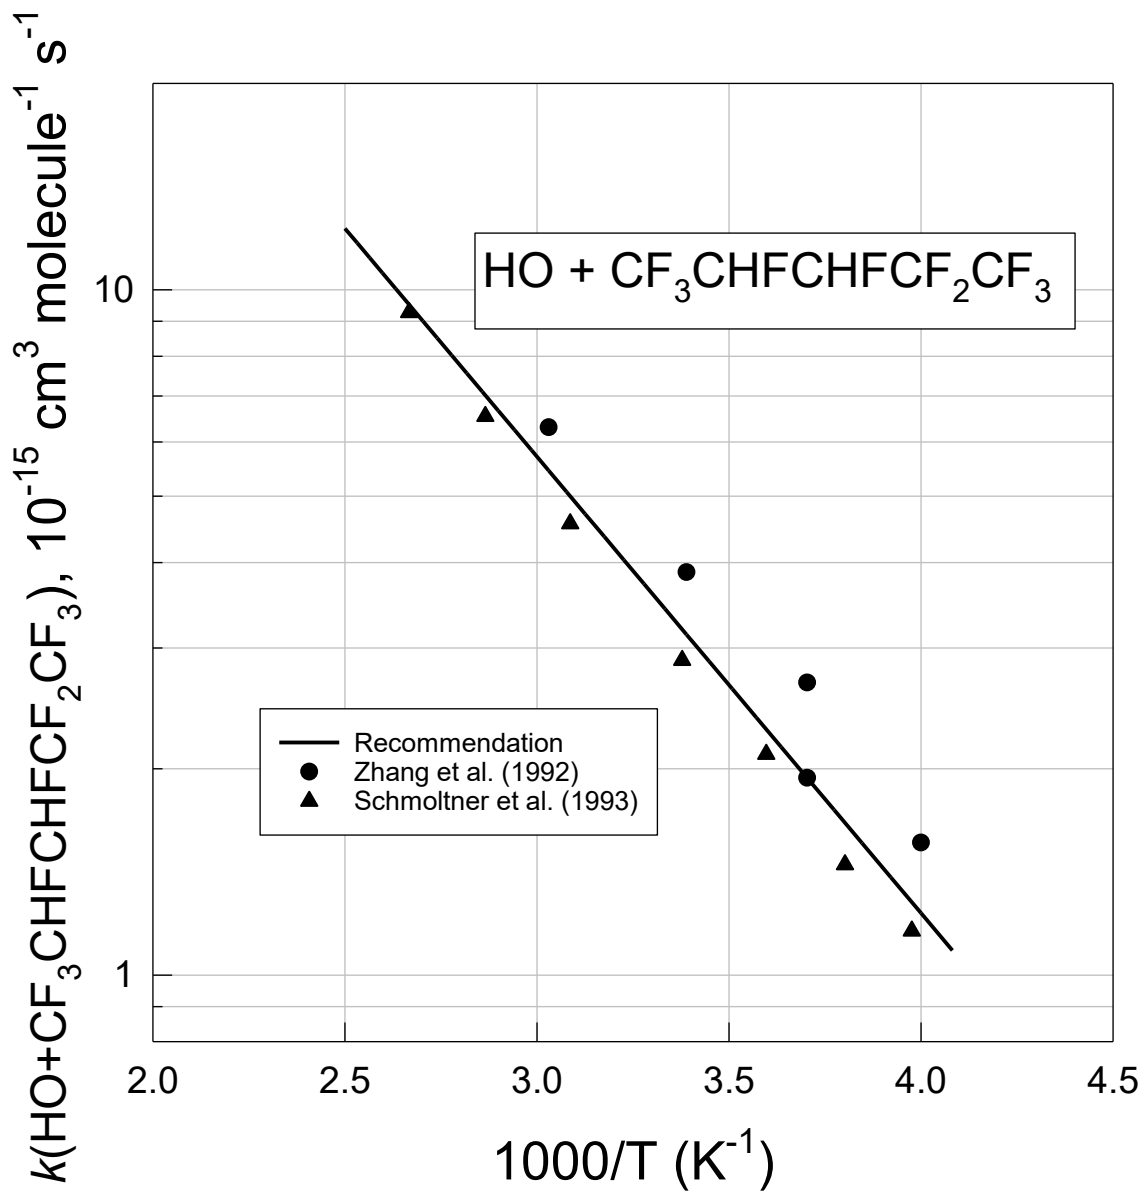

443  
444  
445  
446

447 **oFOx82: HO + CF<sub>3</sub>CF<sub>2</sub>CH<sub>2</sub>CH<sub>2</sub>CF<sub>2</sub>CF<sub>3</sub> (HFC-55-10mcf)**

448 Last evaluated: June 2025; Last change in preferred values: June 2009.

449

450 **HO + CF<sub>3</sub>CF<sub>2</sub>CH<sub>2</sub>CH<sub>2</sub>CF<sub>2</sub>CF<sub>3</sub> (HFC-55-10mcf) → CF<sub>3</sub>CF<sub>2</sub>CHCH<sub>2</sub>CF<sub>2</sub>CF<sub>3</sub> + H<sub>2</sub>O**

451

452 **Rate coefficient data (*k*)**

453

| <i>k</i> /cm <sup>3</sup> molecule <sup>-1</sup> s <sup>-1</sup> | <i>T</i> /K | Reference            | Technique/ Comments |
|------------------------------------------------------------------|-------------|----------------------|---------------------|
| <i>Absolute Rate Coefficients</i>                                |             |                      |                     |
| (7.87±0.38) × 10 <sup>-15</sup>                                  | 295         | Nelson et al. (1995) | DF-LIF (a)          |

454

455 **Comments**

456

457 (a) HO radicals were produced by the reaction of H atoms with NO<sub>2</sub>. Experiments were  
458 performed in 1.6-2.7 Torr (2.1-3.6 mbar) of helium diluent.

459

460 **Preferred Values**

461

| Parameter                                                        | Value                   | <i>T</i> /K |
|------------------------------------------------------------------|-------------------------|-------------|
| <i>k</i> /cm <sup>3</sup> molecule <sup>-1</sup> s <sup>-1</sup> | 8.3 × 10 <sup>-15</sup> | 298         |
| <i>Reliability</i><br>Δ log <i>k</i>                             | 0.2                     | 298         |

462

463

464

465

466

467

468

469

470

471

472

473

474

475

*Comments on Preferred Values*

Nelson et al. measured  $k(\text{HO}+\text{CF}_3\text{CF}_2\text{CH}_2\text{CH}_2\text{CF}_2\text{CF}_3) = (7.87 \pm 0.38) \times 10^{-15} \text{ cm}^3 \text{ molecule}^{-1} \text{ s}^{-1}$  at 295 K. Using an activation energy estimated to be 3.2 kcal mol<sup>-1</sup> (13.4 kJ mol<sup>-1</sup>), Nelson et al. derived a value of  $k(\text{HO}+\text{CF}_3\text{CF}_2\text{CH}_2\text{CH}_2\text{CF}_2\text{CF}_3) = (8.3 \pm 0.9) \times 10^{-15} \text{ cm}^3 \text{ molecule}^{-1} \text{ s}^{-1}$  at 298 K which is our preferred value.

### References

Nelson Jr., D. D., Zahniser, M. S, Kolb, C. E, and Magid, H.: J. Phys. Chem., 99, 16301, 1995.

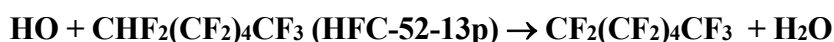

480 **Rate coefficient data (*k*)**

481

482

| <i>k</i> /cm <sup>3</sup> molecule <sup>-1</sup> s <sup>-1</sup> | <i>T</i> /K | Reference          | Technique/ Comments |
|------------------------------------------------------------------|-------------|--------------------|---------------------|
| <i>Absolute Rate Coefficients</i>                                |             |                    |                     |
| 7.36 × 10 <sup>-12</sup> exp[-(1820 ± 60)/ <i>T</i> ]            | 250-430     | Chen et al. (2004) | FP-LIF/ PLP-LIF (a) |
| (1.69±0.07) × 10 <sup>-15</sup>                                  | 298         |                    | FP-LIF (b)          |
| (1.72±0.07) × 10 <sup>-15</sup>                                  | 298         |                    | PLP-LIF (c)         |
| <i>Relative Rate Coefficients</i>                                |             |                    |                     |
| 4.87 × 10 <sup>-13</sup> exp[-1661/ <i>T</i> ]                   | 253-328     | Chen et al. (2004) | RR (d)              |
| 1.87 × 10 <sup>-15</sup>                                         | 298         |                    |                     |
| 2.61 × 10 <sup>-13</sup> exp[-1422/ <i>T</i> ]                   | 253-328     | Chen et al. (2004) | RR (e)              |
| 2.28 × 10 <sup>-15</sup>                                         | 298         |                    |                     |

483 **Comments**

- 484
- 485
- 486 (a) Experiments were conducted using two different absolute rate methods. The sample of  
 487 CHF<sub>2</sub>(CF<sub>2</sub>)<sub>4</sub>CF<sub>3</sub> was determined to be 99.998% pure. In the FP-LIF experiments the HO  
 488 radicals were produced by the photolysis of H<sub>2</sub>O using a Xe flash lamp and experiments were  
 489 performed in 20-100 Torr (27-133 mbar) of argon bath gas. In the PLP-LIF experiments the  
 490 HO radicals were produced by the 193 nm photolysis of N<sub>2</sub>O in the presence of H<sub>2</sub>O.  
 491 Experiments were performed in 20-100 Torr (27-133 mbar) of either argon or helium bath gas.  
 492 The Arrhenius expression is that given by Chen et al. (2004) from a fit to the absolute rate data.  
 493 (b) Result obtained using FP-LIF technique at 298 K in 40-100 Torr (53-133 mbar) total pressure  
 494 of argon bath gas.  
 495 (c) Result obtained using PLP-LIF technique at 298 K in 40-100 Torr (53-133 mbar) total pressure  
 496 of argon or helium bath gas.  
 497 (d) Relative rate method with HO radicals produced by the 254 nm photolysis of O<sub>3</sub> in the  
 498 presence of H<sub>2</sub>O vapor in 200-500 Torr (267-665 mbar) of helium diluent. CHF<sub>2</sub>Cl was used as  
 499 a reference compound. The rate coefficient ratios  $k(\text{HO}+\text{CHF}_2(\text{CF}_2)_4\text{CF}_3)/k(\text{HO}+\text{CHF}_2\text{Cl})$   
 500 were placed on an absolute basis using  $k(\text{HO}+\text{CHF}_2\text{Cl}) = 7.9 \times 10^{-13} \exp(-1530/T) \text{ cm}^3$   
 501  $\text{molecule}^{-1} \text{ s}^{-1}$  (Atkinson et al., 2008).  
 502 (e) Relative rate method with HO radicals produced by the 254 nm photolysis of O<sub>3</sub> in the  
 503 presence of H<sub>2</sub>O vapor in 200-500 Torr (267-665 mbar) of helium diluent. CH<sub>2</sub>FCF<sub>3</sub> was used  
 504 as a reference compound. The rate coefficient ratios  $k(\text{HO}+\text{CHF}_2(\text{CF}_2)_4\text{CF}_3)/k(\text{HO}+\text{CH}_2\text{FCF}_3)$   
 505 were placed on an absolute basis using  $k(\text{HO}+\text{CH}_2\text{FCF}_3) = 4.9 \times 10^{-13} \exp(-1395/T) \text{ cm}^3$   
 506  $\text{molecule}^{-1} \text{ s}^{-1}$  (Atkinson et al., 2008).

507

508

509

510 **Preferred Values**

511

| Parameter                                                        | Value                                          | <i>T</i> /K |
|------------------------------------------------------------------|------------------------------------------------|-------------|
| <i>k</i> /cm <sup>3</sup> molecule <sup>-1</sup> s <sup>-1</sup> | 1.8 × 10 <sup>-15</sup>                        | 298         |
| <i>k</i> /cm <sup>3</sup> molecule <sup>-1</sup> s <sup>-1</sup> | 5.76 × 10 <sup>-13</sup> exp(-1726/ <i>T</i> ) | 250-430     |

|                 |           |         |
|-----------------|-----------|---------|
| $\Delta \log k$ | 0.10      | 298     |
| $\Delta E/R$    | $\pm 300$ | 250-430 |

514

515 *Comments on Preferred Values*

516

517 The results obtained using two absolute rate methods by Chen et al. (2004) are in good agreement.  
 518 An Arrhenius fit to the absolute rate data reported by Chen et al. (2004) gives  $k(\text{HO}+\text{CHF}_2(\text{CF}_2)_4\text{CF}_3) =$   
 519  $5.76 \times 10^{-13} \exp(-1726/T) \text{ cm}^3 \text{ molecule}^{-1} \text{ s}^{-1}$  which is preferred. The relative rate experiments using  
 520  $\text{CHF}_2\text{Cl}$  reference are in excellent agreement with the results from the absolute rate study. The relative  
 521 rate experiments using  $\text{CH}_2\text{FCF}_3$  reference lie somewhat above but are consistent within the  
 522 experimental uncertainties with the preferred values.

523

524

### References

525

526 Atkinson, R., Baulch, D. L., Cox, R. A., Crowley, J. N., Hampson, R. F., Hynes, R. G., Jenkin, M. E.,  
 527 Rossi, M. J., Troe, J., and Wallington, T. J.: *Atmos. Chem. Phys.*, 8, 4141, 2008; IUPAC  
 528 Subcommittee for Gas Kinetic Data Evaluation, <https://iupac.aeris-data.fr/>.

529 Chen, L., Tokuhashi, K., Kutsuna, S., and Sekiya, A.: *Int. J. Chem. Kinet.*, 36, 26, 2004.

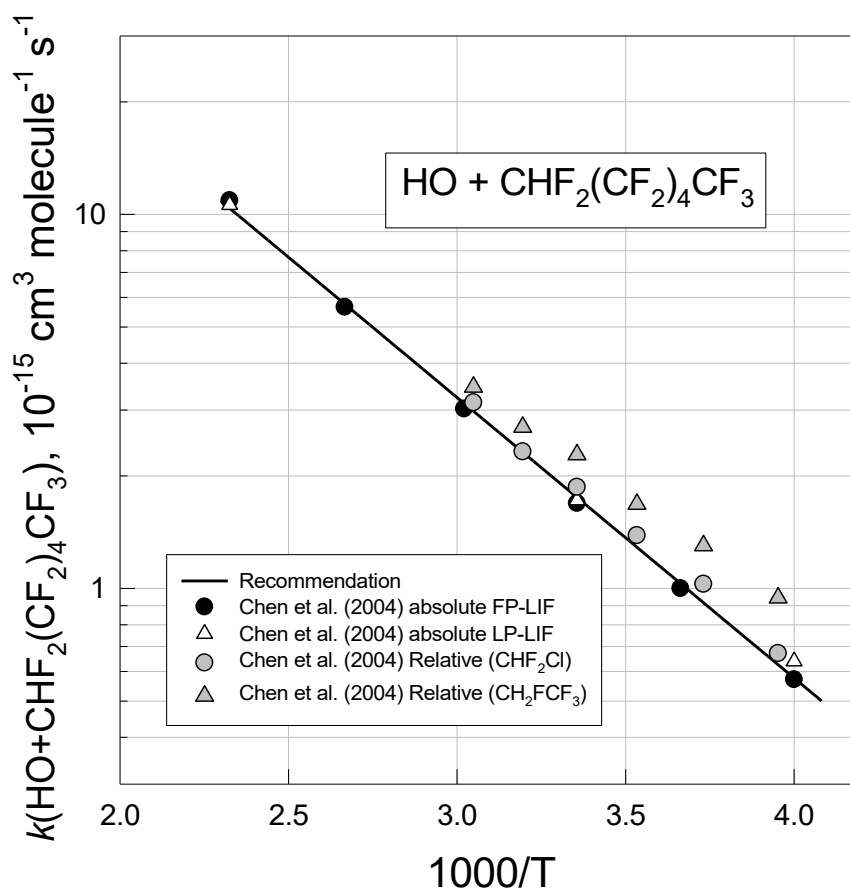

530

531

532 **oClOx86: HO + CH<sub>3</sub>CH<sub>2</sub>Cl**  
 533 Last evaluated: June 2025; Last change in preferred values: June 2009.

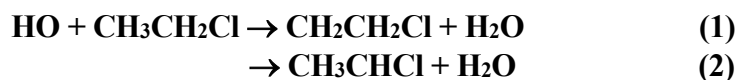

537  
 538 **Rate coefficient data ( $k = k_1 + k_2$ )**  
 539

| $k/\text{cm}^3 \text{ molecule}^{-1} \text{ s}^{-1}$       | $T/\text{K}$ | Reference                     | Technique/ Comments |
|------------------------------------------------------------|--------------|-------------------------------|---------------------|
| <i>Absolute Rate Coefficients</i>                          |              |                               |                     |
| $(3.9 \pm 0.7) \times 10^{-13}$                            | 296          | Howard and Evenson (1976)     | DF-LMR (a)          |
| $(3.94 \pm 0.53) \times 10^{-13}$                          | 297          | Paraskevopoulos et al. (1981) | FP-RA (b)           |
| $2.96 \times 10^{-13} (T/300)^{2.59} \exp[-(28 \pm 75/T)]$ | 295-789      | Kasner et al. (1990)          | FP-LIF (c)          |
| $2.4 \times 10^{-11} \exp(-1082/T)$                        | 295-360      | Markert and Nielsen (1992)    | PR-RA (d)           |
| $(4.3 \pm 0.5) \times 10^{-13}$                            | 295          |                               |                     |
| $1.5 \times 10^{-13} T^{0.5} \exp(-637/T)$                 | 223-426      | Herndon et al. (2001)         | PLP-LIF (e)         |
| $(2.92 \pm 0.12) \times 10^{-13}$                          | 296          |                               |                     |

540  
 541 **Comments**

- 542  
 543 (a) HO radicals were generated by the reaction of H atoms with NO<sub>2</sub> in 0.1-1.0 kPa (1-10 mbar) of  
 544 helium.  
 545 (b) HO radicals produced by the flash photolysis of H<sub>2</sub>O ( $\lambda \geq 165$  nm) in 20-30 Torr (27-40 mbar) of  
 546 helium.  
 547 (c) HO radicals were produced by the 193 nm (ArF excimer laser) photolysis of N<sub>2</sub>O to produce O(<sup>1</sup>D)  
 548 atoms in the presence of H<sub>2</sub>O in 1 bar of helium.  
 549 (d) HO radicals were produced by the pulsed radiolysis of argon (1 bar) containing 15 mbar of H<sub>2</sub>O.  
 550 (e) HO radicals were produced by either the photolysis of HONO at 355 nm (third harmonic Nd:YAG  
 551 laser) or the photolysis of H<sub>2</sub>O<sub>2</sub> at 248 nm (KrF excimer laser) in approximately 100 Torr (133  
 552 mbar) of helium.  
 553

554 **Preferred Values**  
 555

| Parameter                                            | Value                               | T/K     |
|------------------------------------------------------|-------------------------------------|---------|
| $k/\text{cm}^3 \text{ molecule}^{-1} \text{ s}^{-1}$ | $3.7 \times 10^{-13}$               | 298     |
| $k/\text{cm}^3 \text{ molecule}^{-1} \text{ s}^{-1}$ | $4.25 \times 10^{-12} \exp(-727/T)$ | 220-400 |
| <i>Reliability</i>                                   |                                     |         |
| $\Delta \log k$                                      | 0.1                                 | 298     |
| $\Delta E/R$                                         | $\pm 200$                           | 220-400 |

558  
 559 **Comments on Preferred Values**  
 560

561 The room temperature rate coefficients reported by Howard and Evenson (1976),  
 562 Paraskevopoulos et al. (1981), Kasner et al. (1990), and Markert and Nielsen (1992) are in excellent  
 563 agreement. However, there is disagreement between the temperature dependences reported by Kasner  
 564 et al. (1990) and Markert and Nielsen (1992). The data of Markert and Nielsen (1992) are more  
 565 scattered than those from Kasner et al. (1990). The rate coefficients reported by Herndon et al. (2001)  
 566 lie approximately 20-30% below those from the other studies. Herndon et al. (2001) argue that the

567 presence of reactive impurities and/or complications caused by photolysis or radiolysis of the C<sub>2</sub>H<sub>5</sub>Cl  
 568 sample may have led to overestimation of  $k(\text{OH} + \text{C}_2\text{H}_5\text{Cl})$  in previous studies. However, the  
 569 discharge flow experiments by Howard and Evenson (1976) would not suffer from photolysis or  
 570 radiolysis of the C<sub>2</sub>H<sub>5</sub>Cl sample. Also, the impact of an unsaturated reactive impurity such as ethene  
 571 or isobutene would be reduced at the low pressures used. Averaging the results obtained by Howard  
 572 and Evenson (1976), Paraskevopoulos et al. (1981), Kasner et al. (1990), and Herndon et al. (2001)  
 573 gives our preferred value of  $k(\text{HO} + \text{C}_2\text{H}_5\text{Cl}) = 3.71 \times 10^{-13} \text{ cm}^3 \text{ molecule}^{-1} \text{ s}^{-1}$  at 298 K. Fitting the  
 574 three parameter equation  $k = CT^2 \exp(-D/T)$  to the data from Herndon et al. (2001) gives  $k = 5.19 \times 10^{-13}$   
 575  $\text{T}^2 \exp(-131/T) \text{ cm}^3 \text{ molecule}^{-1} \text{ s}^{-1}$  which when centered at 298 K with  $A = C e^2 T^2$  and  $B = D + 2T$   
 576 gives  $k = 3.41 \times 10^{-12} \exp(-727/T) \text{ cm}^3 \text{ molecule}^{-1} \text{ s}^{-1}$ . Adjusting the A factor to match the 298 K  
 577 preferred value of  $k(\text{HO} + \text{C}_2\text{H}_5\text{Cl}) = 3.71 \times 10^{-13}$  gives our preferred Arrhenius expression of  $k = 4.25$   
 578  $\times 10^{-12} \exp(-727/T) \text{ cm}^3 \text{ molecule}^{-1} \text{ s}^{-1}$ .

### 580 References

- 582 Herndon, S. C., Gierczak, T., Talukdar, R. K., and Ravishankara, A. R.: Phys. Chem. Chem.  
 583 Phys., 3 4529, 2001.  
 584 Howard, C. J., and Evenson, K. M.: J. Chem. Phys., 64, 4303, 1976.  
 585 Kasner, J. H., Taylor, P. H., and Dellinger, B.: J. Phys. Chem., 94, 3250, 1990.  
 586 Markert, F., and Nielsen, O. J.: Chem. Phys. Lett., 194, 123, 1992.  
 587 Paraskevopoulos, G., Singleton, D. L., and Irwin, R. S.: J. Phys. Chem., 85, 561, 1981.

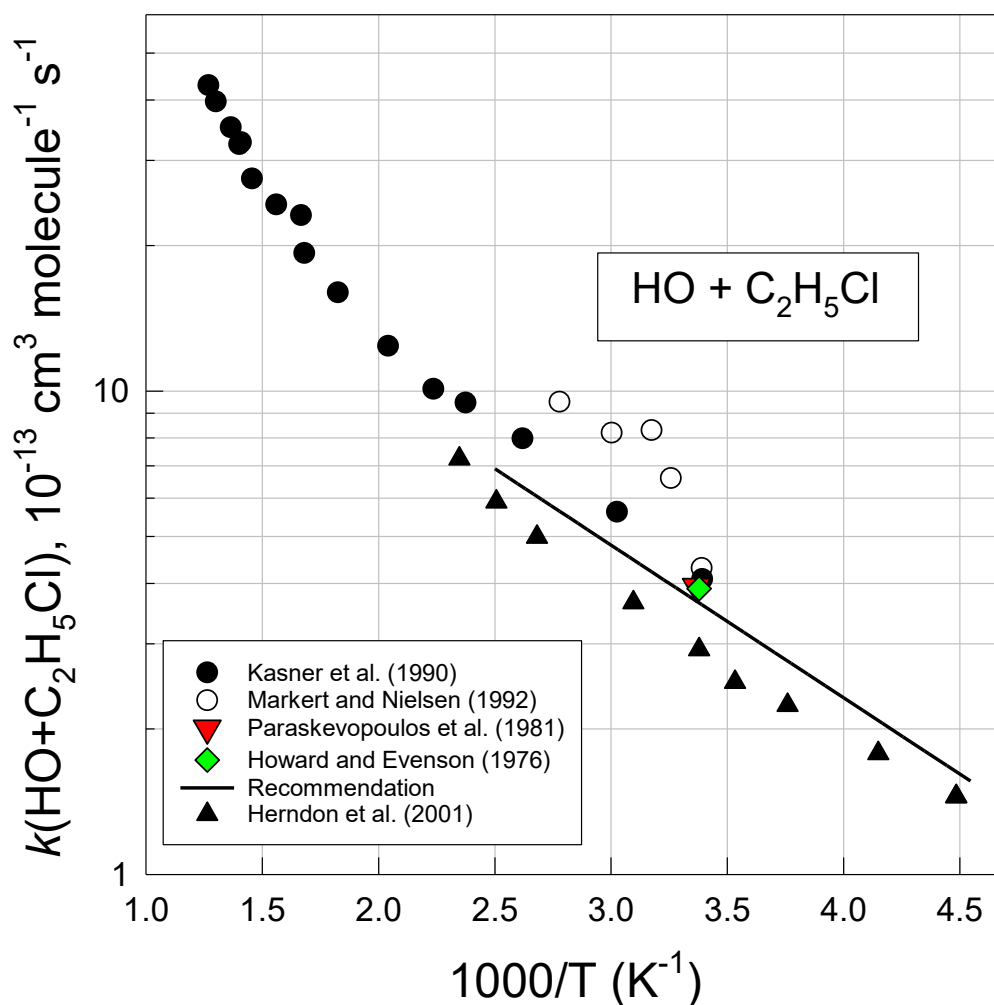

588  
589

590 **oClOx87: HO + CH<sub>2</sub>ClCH<sub>2</sub>Cl**  
 591 Last evaluated: June 2025; Last change in preferred values: June 2009.

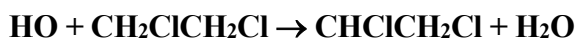

593 **Rate coefficient data (*k*)**

594

595

596

| <i>k</i> /cm <sup>3</sup> molecule <sup>-1</sup> s <sup>-1</sup>                 | <i>T</i> /K | Reference                 | Technique/ Comments |
|----------------------------------------------------------------------------------|-------------|---------------------------|---------------------|
| <i>Absolute Rate Coefficients</i>                                                |             |                           |                     |
| (2.2±0.5) × 10 <sup>-13</sup>                                                    | 296         | Howard and Evenson (1976) | DF-LMR (a)          |
| 4.08×10 <sup>-12</sup> ( <i>T</i> /300) <sup>1.0</sup> exp[-(825±88/ <i>T</i> )] | 292-775     | Taylor et al. (1991)      | PLP-LIF (b)         |
| (2.48±0.38) × 10 <sup>-13</sup>                                                  | 292         |                           |                     |
| 1.05 × 10 <sup>-11</sup> exp[-(1141±107)/ <i>T</i> ]                             | 292-363     | Qiu et al. (1992)         | DF-RF (c)           |
| 2.14 × 10 <sup>-13</sup>                                                         | 295         |                           |                     |
| <i>Relative Rate Coefficients</i>                                                |             |                           |                     |
| (2.50±0.54) × 10 <sup>-13</sup>                                                  | 297         | Arnts et al. (1989)       | RR (d)              |

597 **Comments**

- 598
- 599
- 600 (a) HO radicals were generated by the reaction of H atoms with NO<sub>2</sub> in 0.1-1.0 kPa (0.7-7 Torr) of  
 601 helium diluent.
- 602 (b) HO radicals were produced by the 193 nm (ArF eximer laser) photolysis of N<sub>2</sub>O to produce O(<sup>1</sup>D)  
 603 atoms in the presence of H<sub>2</sub>O in 730-750 Torr (973-1000 mbar) of helium diluent.
- 604 (c) HO radicals were produced by the reaction of F atoms with H<sub>2</sub>O in 2-3 Torr (2.7-4.0 mbar) of argon  
 605 diluent gas.
- 606 (d) The rate coefficient ratio  $k(\text{HO}+\text{CH}_2\text{ClCH}_2\text{Cl})/k(\text{HO}+\text{C}_2\text{H}_6) = 1.02 \pm 0.22$  was placed on an  
 607 absolute basis using  $k(\text{HO}+\text{C}_2\text{H}_6) = 1.49 \times 10^{-17} T^2 \exp(-499/T)$  cm<sup>3</sup> molecule<sup>-1</sup> s<sup>-1</sup> (Atkinson et  
 608 al., 2006).

609 **Preferred Values**

610

611

| Parameter                                                        | Value                                          | T/K     |
|------------------------------------------------------------------|------------------------------------------------|---------|
| <i>k</i> /cm <sup>3</sup> molecule <sup>-1</sup> s <sup>-1</sup> | 2.4 × 10 <sup>-13</sup>                        | 298     |
| <i>k</i> /cm <sup>3</sup> molecule <sup>-1</sup> s <sup>-1</sup> | 8.57 × 10 <sup>-12</sup> exp(-1070/ <i>T</i> ) | 290-360 |
| <i>Reliability</i>                                               |                                                |         |
| Δ log <i>k</i>                                                   | 0.08                                           | 298     |
| Δ <i>E</i> / <i>R</i>                                            | ± 200                                          | 290-360 |

612 **Comments on Preferred Values**

613

614

615 The rate coefficients of Howard and Evenson (1976), Arnts et al. (1989), Taylor et al. (1991),  
 616 and Qiu et al. (1992) are in good agreement. Adjusting the rate coefficients reported by Howard and  
 617 Evenson (1976), Taylor et al. (1991), and Qiu et al. (1992) at 292 – 296 K using the temperature  
 618 dependence reported by Qiu et al. (1992) and taking an average give the preferred value of 2.4 × 10<sup>-13</sup>  
 619 cm<sup>3</sup> molecule<sup>-1</sup> s<sup>-1</sup> at 298 K. Fitting the three-parameter equation  $k = CT^2 \exp(-D/T)$  to the data from  
 620 Howard and Evenson (1976), Arnts et al. (1989), Taylor et al. (1991), and Qiu et al. (1992) and  
 621 adjusting the C factor to reproduce the preferred value at 298 K gives  $k = 1.06 \times 10^{-17} T^2 \exp(-410/T)$   
 622 cm<sup>3</sup> molecule<sup>-1</sup> s<sup>-1</sup>. Centering this expression at 330 K with  $A = C e^2 T^2$  and  $B = D + 2T$  gives  $k = 8.57$   
 623 cm<sup>3</sup> molecule<sup>-1</sup> s<sup>-1</sup>.  
 624

625  $\times 10^{-12} \exp(-1070/T) \text{ cm}^3 \text{ molecule}^{-1} \text{ s}^{-1}$ .

626

627

628

### References

629 Arnts, R. R., Seila, R. L., and Bufalini, J. J.: *J. Air Pollut. Control Assoc.*, 39, 453, 1989.

630 Atkinson, R., Baulch, D. L., Cox, R. A., Crowley, J. N., Hampson, R. F., Hynes, R. G., Jenkin, M. E.,

631 Rossi, M. J., and Troe, J.: *Atmos. Chem. Phys.*, 6, 3625, 2006; IUPAC Subcommittee for Gas Kinetic  
632 Data Evaluation, <https://iupac.aeris-data.fr/>.

633 Herndon, S. C., Gierczak, T., Talukdar, R. K., and Ravishankara, A. R.: *Phys. Chem. Chem. Phys.*, 3,  
634 4529, 2001.

635 Howard, C. J., and Evenson, K. M.: *J. Chem. Phys.*, 64, 4303, 1976.

636 Qiu, L. X., Shi, S. H., Xing, S. B., and Chen, X. G.: *J. Phys. Chem.*, 96, 685, 1992.

637 Taylor, P. H., McCarron, S., and Dellinger, B.: *Chem. Phys. Lett.*, 177, 27, 1991.

638

639

640

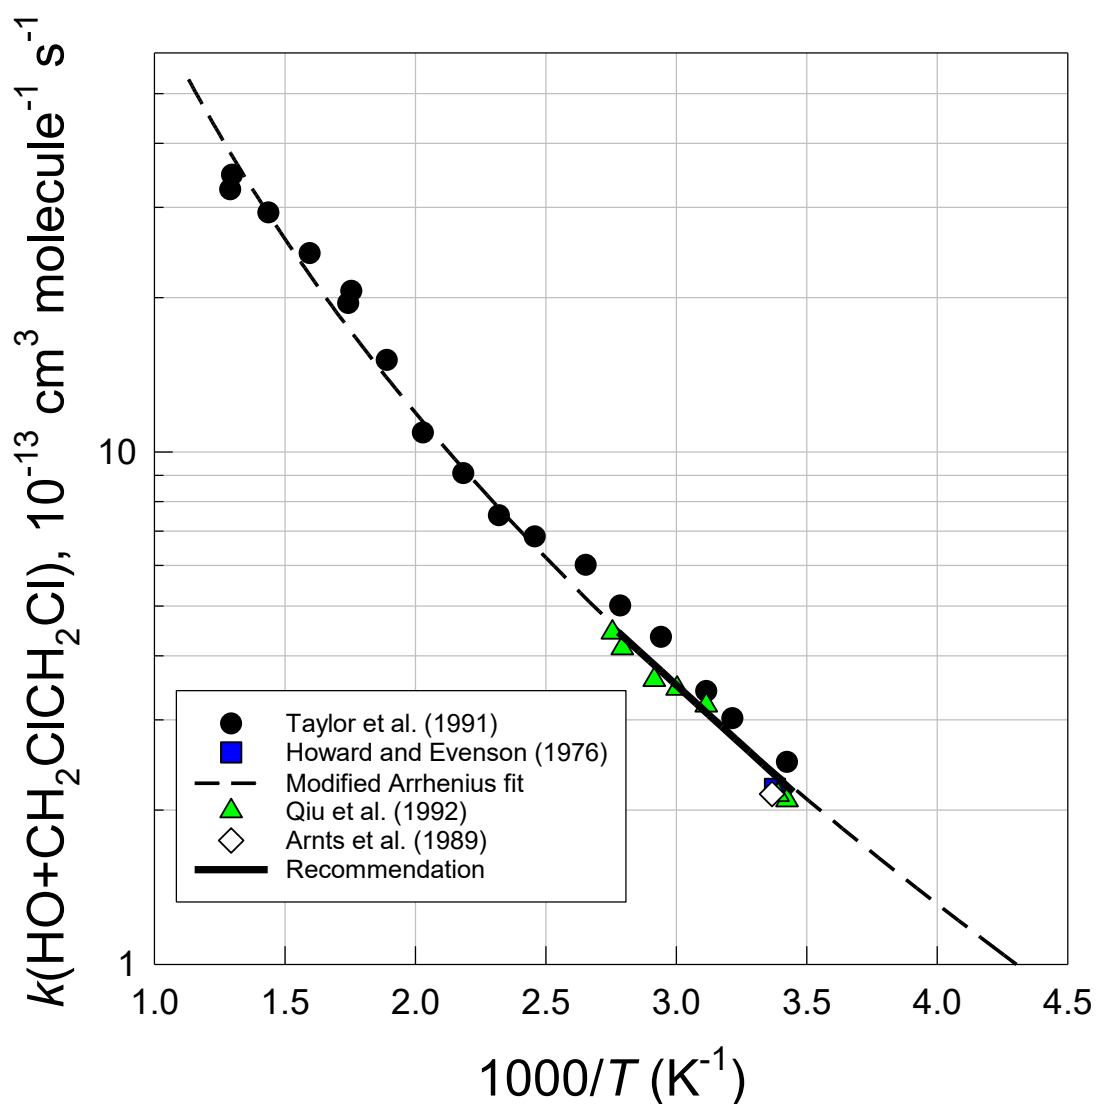

641

642

643  
 644 **oClOx88: HO + CH<sub>3</sub>CHCl<sub>2</sub>**  
 645 Last evaluated: June 2025; Last change in preferred values: June 2009.

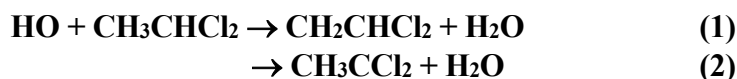

649  
 650 **Rate coefficient data ( $k = k_1 + k_2$ )**  
 651

| $k/\text{cm}^3 \text{ molecule}^{-1} \text{ s}^{-1}$                | $T/\text{K}$ | Reference                 | Technique/ Comments |
|---------------------------------------------------------------------|--------------|---------------------------|---------------------|
| <i>Absolute Rate Coefficients</i>                                   |              |                           |                     |
| $(2.6 \pm 0.6) \times 10^{-13}$                                     | 296          | Howard and Evenson (1976) | DF-LMR (a)          |
| $(8.29 \pm 0.36) \times 10^{-14} (T/300)^{2.67} \exp(387 \pm 18)/T$ | 294-800      | Jiang et al. (1992)       | PLP-LIF (b)         |
| $(2.82 \pm 0.14) \times 10^{-13}$                                   | 294          |                           |                     |

652  
 653 **Comments**

- 654  
 655 (a) HO radicals were generated by the reaction of H atoms with NO<sub>2</sub> in 0.1-1.0 kPa of helium.  
 656 (b) HO radicals were produced by the 193 nm photolysis of N<sub>2</sub>O to give O(<sup>1</sup>D) atoms in the presence of  
 657 H<sub>2</sub>O vapor in  $740 \pm 10$  Torr ( $986 \pm 13$  mbar) of helium.  
 658

659 **Preferred Values**  
 660

| Parameter                                              | Value                               | $T/\text{K}$ |
|--------------------------------------------------------|-------------------------------------|--------------|
| $k / \text{cm}^3 \text{ molecule}^{-1} \text{ s}^{-1}$ | $2.76 \times 10^{-13}$              | 298          |
| $k / \text{cm}^3 \text{ molecule}^{-1} \text{ s}^{-1}$ | $2.04 \times 10^{-12} \exp(-596/T)$ | 290-370      |
| <i>Reliability</i>                                     |                                     |              |
| $\Delta \log k$                                        | 0.1                                 | 298          |
| $\Delta E/R$                                           | $\pm 300$                           | 290-370      |

661  
 662 **Comments on Preferred Values**

663  
 664 The rate coefficients of Howard and Evenson (1976) and Jiang et al. (1992) at room temperature  
 665 are in excellent agreement. Fitting the three-parameter equation  $k = CT^2 \exp(-D/T)$  to the data from  
 666 Howard and Evenson (1976) and Jiang et al. (1992) gives  $k = 2.53 \times 10^{-18} T^2 \exp(64/T) \text{ cm}^3 \text{ molecule}^{-1}$   
 667  $\text{ s}^{-1}$ . Centering this expression at 330 K with  $A = C e^2 T^2$  and  $B = D + 2T$  gives  $k = 2.04 \times 10^{-12} \exp(-$   
 668  $596/T) \text{ cm}^3 \text{ molecule}^{-1} \text{ s}^{-1}$ .  
 669  
 670

671  
 672 **References**

- 673  
 674 Howard, C. J., and Evenson, K. M.: J. Chem. Phys., 64, 4303, 1976.  
 675 Jiang, Z., Taylor, P. H., and Dellinger, B.: J. Phys. Chem., 96, 8964, 1992.  
 676

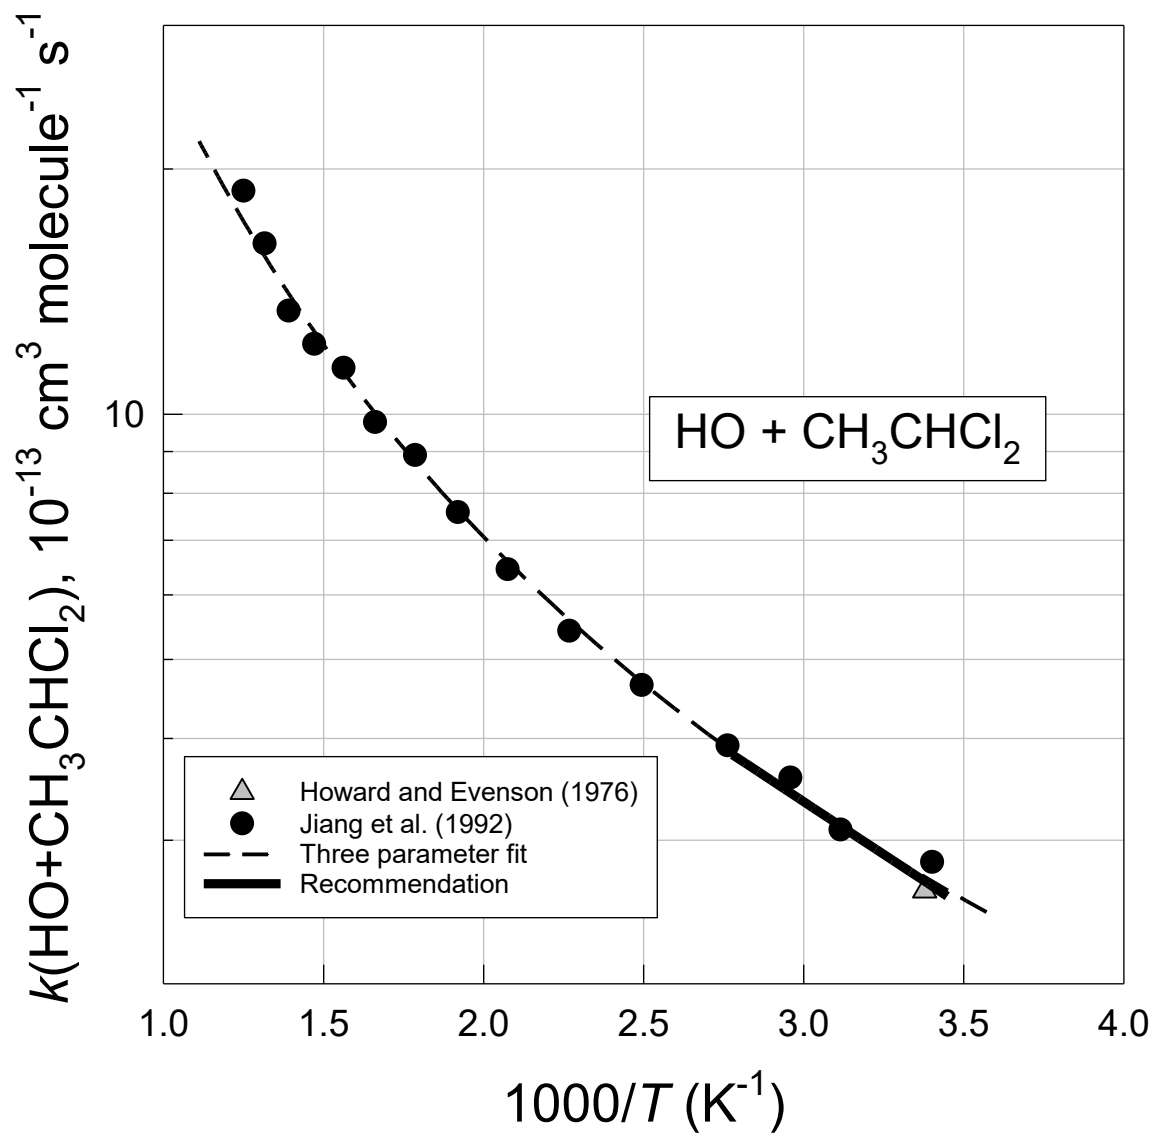

677  
678

681 **HO + CHBr<sub>3</sub> → CBr<sub>3</sub> + H<sub>2</sub>O**

682 **Rate coefficient data (*k*)**

| <i>k</i> /cm <sup>3</sup> molecule <sup>-1</sup> s <sup>-1</sup>                        | <i>T</i> /K    | Reference           | Technique/ Comments |
|-----------------------------------------------------------------------------------------|----------------|---------------------|---------------------|
| <i>Absolute Rate Coefficients</i>                                                       |                |                     |                     |
| 9.94 × 10 <sup>-13</sup> exp[(-387±22)/ <i>T</i> ]<br>(2.69 ± 0.04) × 10 <sup>-13</sup> | 230-370<br>298 | Orkin et al. (2013) | FP-RF (a)           |
| <i>Relative Rate Coefficients</i>                                                       |                |                     |                     |
| 1.31 × 10 <sup>-12</sup> exp(-584/ <i>T</i> )<br>1.86 × 10 <sup>-13</sup>               | 298-366<br>298 | DeMore (1996)       | RR (b)              |

686 **Comments**

- 687
- 688
- 689 (a) HO radicals were generated by the VUV pulsed photolysis of H<sub>2</sub>O in 30 Torr (40 mbar) of  
 690 argon. HO radicals were monitored by resonance fluorescence near 308 nm. The purity of  
 691 the CHBr<sub>3</sub> sample was checked using GC-MS. Results measured using an older version of  
 692 the FP-RF system with a different gas handling system and higher flash energies were  
 693 consistent with those using a newer version of the experimental apparatus.
- 694 (b) HO radicals produced by photolysis of O<sub>3</sub> at 254 nm in the presence of H<sub>2</sub>O vapor in  
 695 argon diluent (total pressure was not specified). CH<sub>2</sub>Cl<sub>2</sub> was used as the reference  
 696 compound. The loss of CHBr<sub>3</sub> and CH<sub>2</sub>Cl<sub>2</sub> was measured using FTIR spectroscopy. A rate  
 697 coefficient ratio  $k(\text{HO}+\text{CHBr}_3)/k(\text{HO}+\text{CH}_2\text{Cl}_2) = (0.73 \pm 0.16) \exp[(276 \pm 71)/T]$  was  
 698 reported. Using  $k(\text{HO}+\text{CH}_2\text{Cl}_2) = 1.8 \times 10^{-12} \exp(-860/T) \text{ cm}^3 \text{ molecule}^{-1} \text{ s}^{-1}$  (Atkinson et  
 699 al., 2008) gives  $k(\text{HO}+\text{CHBr}_3) = 1.31 \times 10^{-12} \exp(-584/T) \text{ cm}^3 \text{ molecule}^{-1} \text{ s}^{-1}$ .

700 **Preferred Values**

| Parameter                                                        | Value                                         | <i>T</i> /K |
|------------------------------------------------------------------|-----------------------------------------------|-------------|
| <i>k</i> /cm <sup>3</sup> molecule <sup>-1</sup> s <sup>-1</sup> | 2.7 × 10 <sup>-13</sup>                       | 298         |
| <i>k</i> /cm <sup>3</sup> molecule <sup>-1</sup> s <sup>-1</sup> | 1.00 × 10 <sup>-12</sup> exp(-388/ <i>T</i> ) | 290-370     |
| <i>Reliability</i>                                               |                                               |             |
| Δ log <i>k</i>                                                   | 0.15                                          | 298         |
| Δ E/R                                                            | ± 300                                         | 290-370     |

705 **Comments on Preferred Values**

706  
 707  
 708 There is a substantial disagreement between the results from the relative rate study by  
 709 DeMore (1996) and the absolute rate study by Orkin et al. (2013). Considerable efforts were  
 710 made by Orkin et al. (2013) to assure the purity of the CHBr<sub>3</sub> sample and it is unlikely that  
 711 the discrepancy reflects the presence of a reactive impurity in the work of Orkin et al.  
 712 (2013). Orkin et al. (2013) obtained consistent results using two different versions of their  
 713 experimental system over a period of several years. DeMore (1996) used CH<sub>2</sub>Cl<sub>2</sub> as a  
 714 reference compound. In the presence of O<sub>2</sub> the degradation of CH<sub>2</sub>Cl<sub>2</sub> produces chlorine  
 715 atoms (Niki et al., 1980). At 298 K, the rate coefficient ratio  $k(\text{Cl}+\text{CHBr}_3)/k(\text{Cl}+\text{CH}_2\text{Cl}_2) =$   
 716 0.79 (Atkinson et al., 2008; Kamboures et al, 2002) is about a factor of 3 lower than the rate

717 coefficient ratio  $k(\text{HO}+\text{CHBr}_3)/k(\text{HO}+\text{CH}_2\text{Cl}_2) = 2.7$  (present work; Atkinson et al., 2008).  
718 Additional loss of  $\text{CH}_2\text{Cl}_2$  via reaction with chlorine atoms is a likely explanation of the  
719 discrepancy between the results from DeMore (1996) and the absolute rate study by Orkin et  
720 al. (2013). The preferred Arrhenius expression is derived from a fit to the data from Orkin et  
721 al. (2013).

722  
723  
724

### References

725 Atkinson, R., Baulch, D. L., Cox, R. A., Crowley, J. N., Hampson, R. F., Hynes, R. G., Jenkin,  
726 M. E., Rossi, M. J., Troe, J., and Wallington, T. J.: Atmos. Chem. Phys., 8, 4141, 2008;  
727 IUPAC Task Group on Atmospheric Chemical Kinetic Data Evaluation, [https://iupac.aeris-  
729 data.fr/en/home-english/](https://iupac.aeris-<br/>728 data.fr/en/home-english/).  
730 DeMore, W. B.: J. Phys. Chem., 100, 5813, 1996.  
731 Kamboures, M. A., Hansen, J. C., Francisco, J. S.: Chem. Phys. Lett., 353, 335, 2002.  
732 Niki, H., Maker, P. D., Savage, C. M., and Breitenbach, L. P.: Int. J. Chem. Kinet., 12, 1001,  
733 1980.  
734 Orkin, V. L., Khamaganov, V. G., Kozlov, S. N., and Kurylo, M. J.: J. Phys. Chem. A, 117,  
735 3809, 2013.  
736

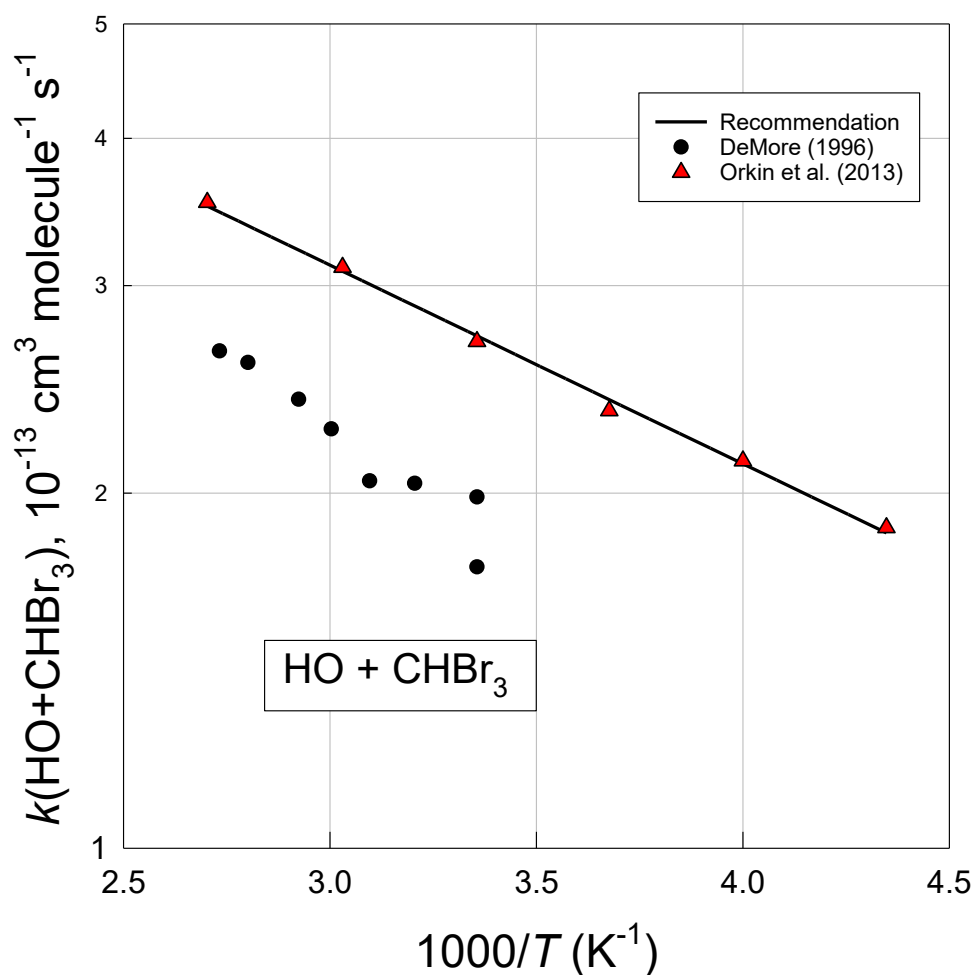

737  
738

739 **oBrOx17: HO + CH<sub>3</sub>CH<sub>2</sub>Br**  
 740 Last evaluated: June 2025; Last change in preferred values: June 2009.

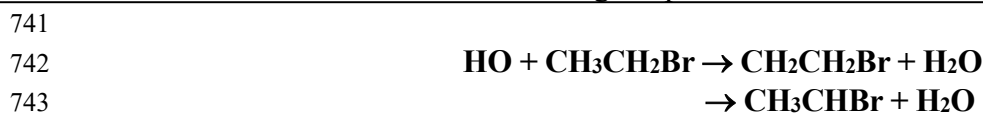

744  
 745 **Rate coefficient data ( $k = k_1 + k_2$ )**  
 746

| $k/\text{cm}^3 \text{ molecule}^{-1} \text{ s}^{-1}$     | $T/\text{K}$ | Reference                             | Technique/ Comments |
|----------------------------------------------------------|--------------|---------------------------------------|---------------------|
| <i>Absolute Rate Coefficients</i>                        |              |                                       |                     |
| $(2.77 \pm 0.34) \times 10^{-12} \exp[-(1344 \pm 86)/T]$ | 292-418      | Qiu et al. (1992), Xing et al. (1992) | DF-RF (a)           |
| $3.05 \times 10^{-13}$                                   | 298          |                                       |                     |
| $1.7 \times 10^{-13} T^{0.5} \exp(-641/T)$               | 233-422      | Herndon et al. (2001)                 | PLP-LIF (b)         |
| $3.29 \times 10^{-13}$                                   | 297          |                                       |                     |
| <i>Relative Rate Coefficients</i>                        |              |                                       |                     |
| $(2.18 \pm 0.07) \times 10^{-13}$                        | 300          | Donaghy et al. (1993)                 | RR (c)              |

747  
 748 **Comments**

- 749  
 750 (a) HO radicals were produced by the reaction of F atoms with H<sub>2</sub>O in 2-3 Torr (2.7-4.0 mbar)  
 751 of argon diluent gas. There is substantial overlap in the data set reported by Qiu et al. (1992)  
 752 and Xing et al. (1992). For simplicity we refer to the combined data set published in these  
 753 two papers as Qiu et al. (1992). Experiments were performed before and after pumping on,  
 754 and removing a third of the sample. There was no discernable difference in the measured  
 755 rate coefficients suggesting the absence of complications from volatile impurities. The value  
 756 given at 298 K above is the average of the measurements reported by Qiu et al. (1992).  
 757 (b) HO radicals were produced by either the photolysis of HONO at 355 nm or the photolysis of  
 758 H<sub>2</sub>O<sub>2</sub> at 248 nm in approximately 100 Torr (133 mbar) of helium. The value given at 296 K  
 759 above is the average of the measurements reported by Herndon et al. (2001). The C<sub>2</sub>H<sub>5</sub>Br  
 760 sample was checked for impurities using gas chromatography; none were found.  
 761 (c) HO radicals were produced by the photolysis of CH<sub>3</sub>ONO in one atmosphere pressure of air.  
 762 Ethane was used as the reference compound and a rate coefficient ratio of  
 763  $k(\text{HO}+\text{C}_2\text{H}_5\text{Br})/k(\text{HO}+\text{C}_2\text{H}_6) = 0.885 \pm 0.030$  was reported. Using  $k(\text{HO}+\text{C}_2\text{H}_6) = 6.9 \times 10^{-12}$   
 764  $\exp(-1000/T)$  (Atkinson et al., 2006) gives  $k(\text{HO}+\text{C}_2\text{H}_5\text{Br}) = (2.18 \pm 0.07) \times 10^{-13} \text{ cm}^3$   
 765  $\text{molecule}^{-1} \text{ s}^{-1}$ .

766  
 767 **Preferred Values**

| Parameter                                            | Value                               | $T/\text{K}$ |
|------------------------------------------------------|-------------------------------------|--------------|
| $k/\text{cm}^3 \text{ molecule}^{-1} \text{ s}^{-1}$ | $3.3 \times 10^{-13}$               | 298          |
| $k/\text{cm}^3 \text{ molecule}^{-1} \text{ s}^{-1}$ | $2.25 \times 10^{-12} \exp(-576/T)$ | 230-300      |
| <i>Reliability</i>                                   |                                     |              |
| $\Delta \log k$                                      | 0.15                                | 298          |
| $\Delta E/R$                                         | $\pm 300$                           | 230-300      |

771  
 772 *Comments on Preferred Values*

773  
 774 With the exception of the highest temperature data point (418 K from Xing et al., 1992), the

775 absolute rate coefficients of Qiu et al. (1992) and Herndon et al. (2001) are in reasonable  
 776 agreement over the temperature range over which measurements were conducted. In contrast, the  
 777 rate coefficient reported in the relative rate study of Donaghy et al. (1993) is significantly lower  
 778 than those reported by Qiu et al. (1992) and Herndon et al. (2001). The temperature dependence  
 779 reported by Qiu et al. (1992) is substantially greater than that reported by Herndon et al. (2001).  
 780 Fitting the three-parameter equation  $k = CT^2 \exp(-D/T)$  to the data from Qiu et al. (1992)  
 781 [excluding the data point at 418 K] and Herndon et al. (2001) gives  $k = 7.12 \times 10^{-18} T^2 \exp(-$   
 782  $193/T) \text{ cm}^3 \text{ molecule}^{-1} \text{ s}^{-1}$ . Taking an average of the rate coefficients reported by Qiu et al. (1992)  
 783 and Herndon et al. (2001) at 296-298 K gives our preferred value of  $3.26 \times 10^{-13} \text{ cm}^3 \text{ molecule}^{-1} \text{ s}^{-1}$   
 784 at 298 K. Fitting the Arrhenius expression to this data and that at lower temperatures reported  
 785 by Herndon et al. (2001) gives  $k = 2.25 \times 10^{-12} \exp(-576/T) \text{ cm}^3 \text{ molecule}^{-1} \text{ s}^{-1}$  which is  
 786 preferred over the range 230-300 K.

## 787 References

- 788  
 789  
 790 Atkinson, R., Baulch, D. L., Cox, R. A., Crowley, J. N., Hampson, R. F., Hynes, R. G., Jenkin, M.  
 791 E., Rossi, M. J., and Troe, J.: Atmos. Chem. Phys., 6, 3625, 2006; Task Group on Atmospheric  
 792 Chemical Kinetic Data Evaluation, <https://iupac.aeris-data.fr/>.  
 793 Donaghy, T., Shanahan, I., Hande, M., and Fitzpatrick, S.: Int. J. Chem. Kinet., 25, 273, 1993.  
 794 Herndon, S. C., Gierczak, T., Talukdar, R. K., and Ravishankara, A. R.: Phys. Chem. Chem.  
 795 Phys., 3 4529, 2001.  
 796 Qiu, L.X., Shi, S.-H., Xing, S.-B., and Chen, X. G.: J. Phys. Chem., 96, 685, 1992.  
 797 Xing, S.-B., Shi, S.-H., Qiu, L. X.: Int. J. Chem. Kinet., 24, 1, 1992.  
 798

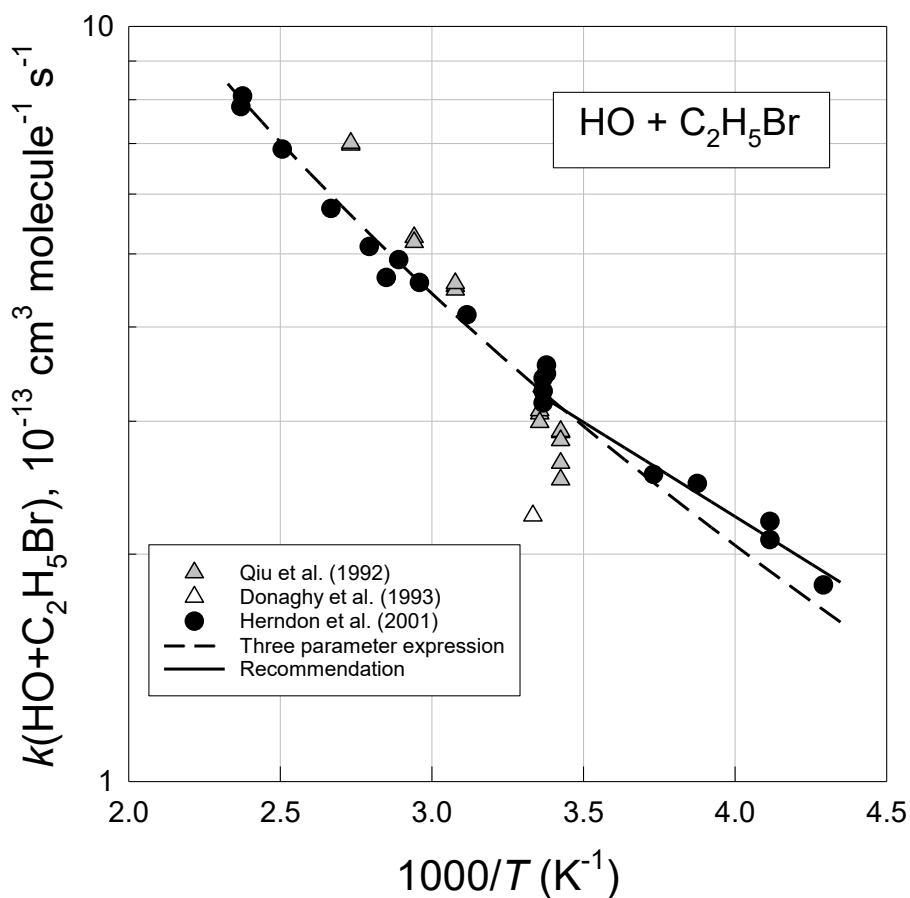

799  
 800

801 **oBrOx18: HO + CH<sub>2</sub>BrCH<sub>2</sub>Br**  
 802 Last evaluated: June 2025; Last change in preferred values: June 2009.  
 803

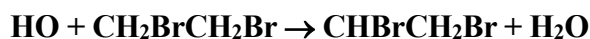

807 **Rate coefficient data (*k*)**  
 808

| <i>k</i> /cm <sup>3</sup> molecule <sup>-1</sup> s <sup>-1</sup> | <i>T</i> /K | Reference                 | Technique/ Comments |
|------------------------------------------------------------------|-------------|---------------------------|---------------------|
| <i>Absolute Rate Coefficients</i>                                |             |                           |                     |
| (2.50 ± 0.55) × 10 <sup>-13</sup>                                | 296         | Howard and Evenson (1976) | DF-LMR (a)          |
| (1.46 ± 0.26) × 10 <sup>-11</sup> exp[-(1283 ± 136)/ <i>T</i> ]  | 294-365     | Qiu et al. (1992)         | DF-RF (b)           |
| 1.86 × 10 <sup>-13</sup>                                         | 294         |                           |                     |
| <i>Relative Rate Coefficients</i>                                |             |                           |                     |
| (2.15 ± 0.45) × 10 <sup>-13</sup>                                | 300         | Arnts et al. (1989)       | RR (c)              |

809  
 810 **Comments**  
 811

- 812 (a) HO radicals were generated by the reaction of H atoms with NO<sub>2</sub> in 0.1-1.0 kPa (1-10 mbar) of  
 813 helium.  
 814 (b) HO radicals were produced by the reaction of F atoms with H<sub>2</sub>O in 2-3 Torr (2.7-4.0 mbar) of  
 815 argon. The results reported by Qiu et al. (1992) are an extension of the data set reported by  
 816 Xing et al. (1992).  
 817 (c) The rate coefficient ratio  $k(\text{HO}+\text{CH}_2\text{BrCH}_2\text{Br})/k(\text{HO}+\text{C}_2\text{H}_6) = 0.88 \pm 0.18$  was placed on an  
 818 absolute basis using  $k(\text{HO}+\text{C}_2\text{H}_6) = 1.49 \times 10^{-17} T^2 \exp(-499/T) \text{ cm}^3 \text{ molecule}^{-1} \text{ s}^{-1}$  (Atkinson  
 819 et al., 2006).  
 820

821 **Preferred Values**  
 822

| Parameter                                                        | Value                                          | <i>T</i> /K |
|------------------------------------------------------------------|------------------------------------------------|-------------|
| <i>k</i> /cm <sup>3</sup> molecule <sup>-1</sup> s <sup>-1</sup> | 2.22 × 10 <sup>-13</sup>                       | 298         |
| <i>k</i> /cm <sup>3</sup> molecule <sup>-1</sup> s <sup>-1</sup> | 7.69 × 10 <sup>-12</sup> exp(-1056/ <i>T</i> ) | 290-370     |
| <i>Reliability</i>                                               |                                                |             |
| Δ log <i>k</i>                                                   | 0.1                                            | 298         |
| Δ <i>E</i> / <i>R</i>                                            | ± 300                                          | 290-370     |

823  
 824 **Comments on Preferred Values**  
 825

826 The absolute rate coefficients of Howard and Evenson (1976), Qiu et al. (1992), and Arnts et al.  
 827 (1989) are in reasonable agreement at ambient temperature. Fitting the Arrhenius expression to  
 828 the combined data set from the three studies gives  $k = 7.69 \times 10^{-12} \exp(-1056/T) \text{ cm}^3 \text{ molecule}^{-1}$   
 829  $\text{ s}^{-1}$  (Calvert et al., 2010) which is preferred over the range 290-370 K.  
 830  
 831  
 832

833 **References**  
 834

- 835 Arnts, R. R., Seila, R. L., and Bufalini, J. J.: J. Air Pollut. Control Assoc., 39, 453, 1989.  
 836 Atkinson, R., Baulch, D. L., Cox, R. A., Crowley, J. N., Hampson, R. F., Hynes, R. G., Jenkin, M.  
 837 E., Rossi, M. J., and Troe, J.: Atmos. Chem. Phys., 6, 3625, 2006; IUPAC Task Group on

838 Atmospheric Chemical Kinetic Data Evaluation, <https://iupac.aeris-data.fr/>.  
839 Calvert, J. G., Mellouki, A., Orlando, J. J., Pilling, M., and Wallington T. J.: The Mechanisms of  
840 Atmospheric Oxidation of the Oxygenates, Oxford University Press, New York, NY, to appear,  
841 2010.  
842 Howard, C. J., and Evenson, K. M.: J. Chem. Phys., 64, 4303, 1976.  
843 Qiu, L. X., Shi, S. H., Xing, S.-B., and Chen, X. G.: J. Phys. Chem., 96, 685, 1992.  
844 Xing, S.-B., Shi, S.-H., and Qiu, L. X.: Int. J. Chem. Kinet., 24, 1, 1992.  
845

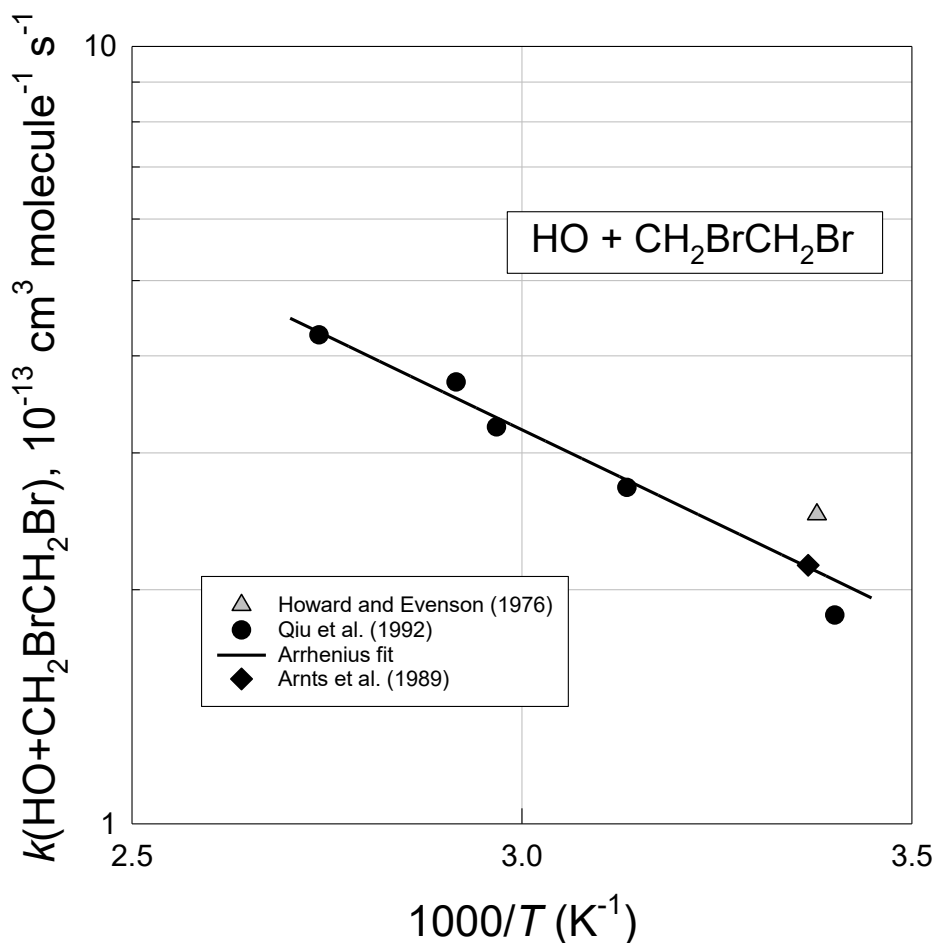

846  
847

848 **oBrOx19: HO + CH<sub>3</sub>CH<sub>2</sub>CH<sub>2</sub>Br**  
 849 Last evaluated: June 2025; Last change in preferred values: June 2009.

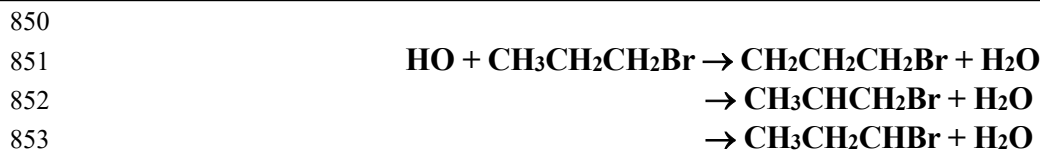

854  
 855 **Rate coefficient data ( $k = k_1 + k_2 + k_3$ )**  
 856

| $k/\text{cm}^3 \text{ molecule}^{-1} \text{ s}^{-1}$    | $T/\text{K}$ | Reference             | Technique/ Comments |
|---------------------------------------------------------|--------------|-----------------------|---------------------|
| <i>Absolute Rate Coefficients</i>                       |              |                       |                     |
| $(5.29 \pm 0.29) \times 10^{-12} \exp[-(456 \pm 31)/T]$ | 233-372      | Téton et al. (1996)   | PLP-LIF (a)         |
| $1.17 \times 10^{-12}$                                  | 298          |                       |                     |
| $(5.75 \pm 0.90) \times 10^{-12} \exp[-(504 \pm 50)/T]$ | 294-365      | Nelson et al. (1997)  | DF-LIF (b)          |
| $(1.01 \pm 0.10) \times 10^{-12}$                       | 295          |                       |                     |
| $9.1 \times 10^{-14} T^{0.5} \exp(-157/T)$              | 230-386      | Herndon et al. (2001) | PLP-LIF (c)         |
| $(8.8 \pm 0.4) \times 10^{-13}$                         | 298          |                       |                     |
| $(6.6 \pm 0.52) \times 10^{-18} T^2 \exp(154 \pm 24)$   | 230-360      | Gilles et al. (2002)  | PLP-LIF (d)         |
| $(9.72 \pm 0.32) \times 10^{-13}$                       | 297          |                       |                     |
| $2.99 \times 10^{-13} (T/298)^{2.79} \exp(369/T)$       | 210-480      | Kozlov et al. (2003)  | FP-RF (e)           |
| $(1.01 \pm 0.15) \times 10^{-12}$                       | 298          |                       |                     |
| $1.32 \times 10^{-17} T^{1.95} \exp(25/T)$              | 297-725      | Brykov et al. (2007)  | PLP-LIF (f)         |
| $9.51 \times 10^{-13}$                                  | 297          |                       |                     |
| <i>Relative Rate Coefficients</i>                       |              |                       |                     |
| $(1.10 \pm 0.06) \times 10^{-12}$                       | 300          | Donaghy et al. (1993) | RR (g)              |

857  
 858 **Comments**

- 859  
 860 (a) HO radicals were generated by the photolysis of H<sub>2</sub>O<sub>2</sub> at 248 nm in approximately 100 Torr  
 861 (133 mbar) of helium.  
 862 (b) HO radicals were generated by the reaction of H atoms with NO<sub>2</sub> in 1.1-2.3 Torr (1.5-3.1 kPa)  
 863 of helium.  
 864 (c) HO radicals were produced by the photolysis of HONO at 355 nm (third harmonic Nd:YAG  
 865 laser) in approximately 100 Torr (133 mbar) of helium diluent.  
 866 (d) HO radicals were generated by the photolysis of HONO at 351 nm in 50 Torr (67 kPa) of  
 867 helium.  
 868 (e) HO radicals were generated by the photolysis of H<sub>2</sub>O using a xenon flash lamp. Experiments  
 869 were performed in 30 Torr (4 mbar) of argon.  
 870 (f) HO radicals were generated by either the photolysis of N<sub>2</sub>O at 193 nm (ArF excimer laser) to  
 871 make O(<sup>1</sup>D) atoms in the presence of H<sub>2</sub>O vapor, or the photolysis of HNO<sub>3</sub> at 248 nm (KrF  
 872 excimer laser) in 6.69-26.73 kPa of helium.  
 873 (g) The rate coefficient ratio  $k(\text{HO} + \text{C}_3\text{H}_5\text{Br})/k(\text{HO} + \text{cyclohexane}) = 0.156 \pm 0.008$  was placed on  
 874 an absolute basis using  $k(\text{HO} + \text{cyclohexane}) = 3.26 \times 10^{-17} T^2 \exp(-262/T) \text{ cm}^3 \text{ molecule}^{-1} \text{ s}^{-1}$   
 875 (Atkinson, 2003).  
 876  
 877  
 878  
 879  
 880

881  
882

## Preferred Values

| Parameter                                              | Value                               | T/K     |
|--------------------------------------------------------|-------------------------------------|---------|
| $k / \text{cm}^3 \text{ molecule}^{-1} \text{ s}^{-1}$ | $1.0 \times 10^{-12}$               | 298     |
| $k / \text{cm}^3 \text{ molecule}^{-1} \text{ s}^{-1}$ | $3.91 \times 10^{-12} \exp(-399/T)$ | 210-300 |
| $k_1/k$                                                | 0.32                                |         |
| $k_2/k$                                                | 0.56                                |         |
| $k_3/k$                                                | 0.12                                |         |
| <i>Reliability</i>                                     |                                     |         |
| $\Delta \log k$                                        | 0.1                                 | 298     |
| $\Delta \log E/R$                                      | $\pm 200$                           | 210-300 |
| $\Delta k_1/k$                                         | 0.10                                |         |
| $\Delta k_2/k$                                         | 0.05                                |         |
| $\Delta k_3/k$                                         | 0.10                                |         |

883  
884

885

*Comments on Preferred Values*

887

888

889

890

891

892

893

894

895

896

897

898

899

900

901

902

903

904

905

906

907

908

909

910

911

912

913

914

915

916

917

918

The rate coefficients obtained in the absolute rate studies by Téton et al. (1996), Nelson et al. (1997), Gilles et al. (2002), Kozlov et al. (2003), and Brykov et al. (2003) and in the relative rate study by Donaghy et al. (1993) are in good agreement. The results from the absolute rate study by Herndon et al. (2001) at ambient temperature and above lie approximately 20-30% below those from the other studies. Excluding the data from Herndon et al. (2001) and fitting the three parameter equation  $k = CT^2 \exp(-D/T)$  to the remaining composite data set gives  $k = 8.14 \times 10^{-18} T^2 \exp(111/T) \text{ cm}^3 \text{ molecule}^{-1} \text{ s}^{-1}$ . Centering this expression at 255 K with  $A = Ce^2 T^2$  and  $B = D + 2T$  gives  $k = 3.91 \times 10^{-12} \exp(-399/T) \text{ cm}^3 \text{ molecule}^{-1} \text{ s}^{-1}$  which is preferred over the range 210-300 K.

From an analysis of kinetic data for the reaction of HO radicals with  $\text{CH}_3\text{CH}_2\text{CH}_2\text{Br}$ ,  $\text{CD}_3\text{CH}_2\text{CH}_2\text{Br}$ ,  $\text{CD}_3\text{CH}_2\text{CD}_2\text{Br}$ ,  $\text{CH}_3\text{CD}_2\text{CD}_2\text{Br}$ , and  $\text{CD}_3\text{CD}_2\text{CD}_2\text{Br}$ , Gilles et al. (2002) deduced branching ratios at 298 K for abstraction at the 1-, 2-, and 3- positions in  $\text{CH}_3\text{CH}_2\text{CH}_2\text{Br}$  of  $0.32 \pm 0.08$ ,  $0.56 \pm 0.04$ , and  $0.12 \pm 0.08$ , respectively. As discussed by Calvert et al. (2008), Gilles et al. (2002) conducted a study of the products of the OH radical initiated oxidation of  $\text{CH}_3\text{CH}_2\text{CH}_2\text{Br}$  in 620 Torr of air in the presence of  $\text{NO}_x$  at room temperature. Propanal and bromoacetone were identified in molar yields of  $30 \pm 15$  and  $50 \pm 20\%$ , respectively. The propanal and bromoacetone yields were indistinguishable from the branching ratios for hydrogen abstraction by OH radicals at the 1- and 2- positions deduced from the experiments with the deuterated n-propyl bromide samples. At low  $[\text{O}_2]$  propene was observed as a product indicating that reaction with  $\text{O}_2$  and dissociation via Br atom elimination are competing loss mechanisms for  $\text{CH}_3\text{CHCH}_2\text{Br}$  radicals. Gilles et al. (2002) derived  $k_{\text{O}_2}/k_{\text{diss}} = (4.0 \pm 0.6) \times 10^{-18} \text{ cm}^3 \text{ molecule}^{-1}$ . In one atmosphere of air  $k_{\text{O}_2}[\text{O}_2]/k_{\text{diss}} = 21$ , and reaction with  $\text{O}_2$  dominates the atmospheric fate of  $\text{CH}_3\text{CHCH}_2\text{Br}$  radicals. Reaction of HO radicals with  $\text{CH}_3\text{CH}_2\text{CH}_2\text{Br}$  at the 3- position is expected to be of minor (< 20%) importance. The major products of the HO radical initiated oxidation of  $\text{CH}_3\text{CH}_2\text{CH}_2\text{Br}$  are propanal and bromoacetone.

## References

- Atkinson, R.: Atmos. Chem. Phys., 3, 2233, 2003.  
 Bryukov, M. G., Vidrine, R. G., and Dillinger, B.: J. Phys. Chem. A, 111, 6197, 2007.

919 Calvert, J. G., Derwent, R. G., Orlando, J. J., Tyndall, G. S., and Wallington T. J.: Mechanisms of  
 920 Atmospheric Oxidation of the Alkanes, Oxford University Press, New York, NY, 2008.  
 921 Donaghy, T., Shanahan, I., Hande, M., and Fitzpatrick, S.: Int. J. Chem. Kinet., 25, 273, 1993.  
 922 Gilles, M. K., Burkholder, J.B., Gierczak, T., Marshall, P., and Ravishankara, A.R.: J. Phys.  
 923 Chem. A, 106, 5358, 2002.  
 924 Herndon, S. C., Gierczak, T., Talukdar, R. K., and Ravishankara, A. R.: Phys. Chem. Chem.  
 925 Phys., 3 4529, 2001.  
 926 Kozlov, S. N., Orkin, V. L., Huie, R. E., and Kurylo, M. J.: J. Phys. Chem. A, 107, 1333, 2003.  
 927 Nelson Jr., D. D., Wormhoudt, J. C., Zahniser, M. S., Kolb, C. E., Ko, M. K. W., and  
 928 Weisenstein, D. K.: J. Phys. Chem. A, 101, 4987, 1997.  
 929 Téton, S., El Boudali, A., and Mellouki, A.: J. Chim. Phys., 93, 274, 1996.  
 930

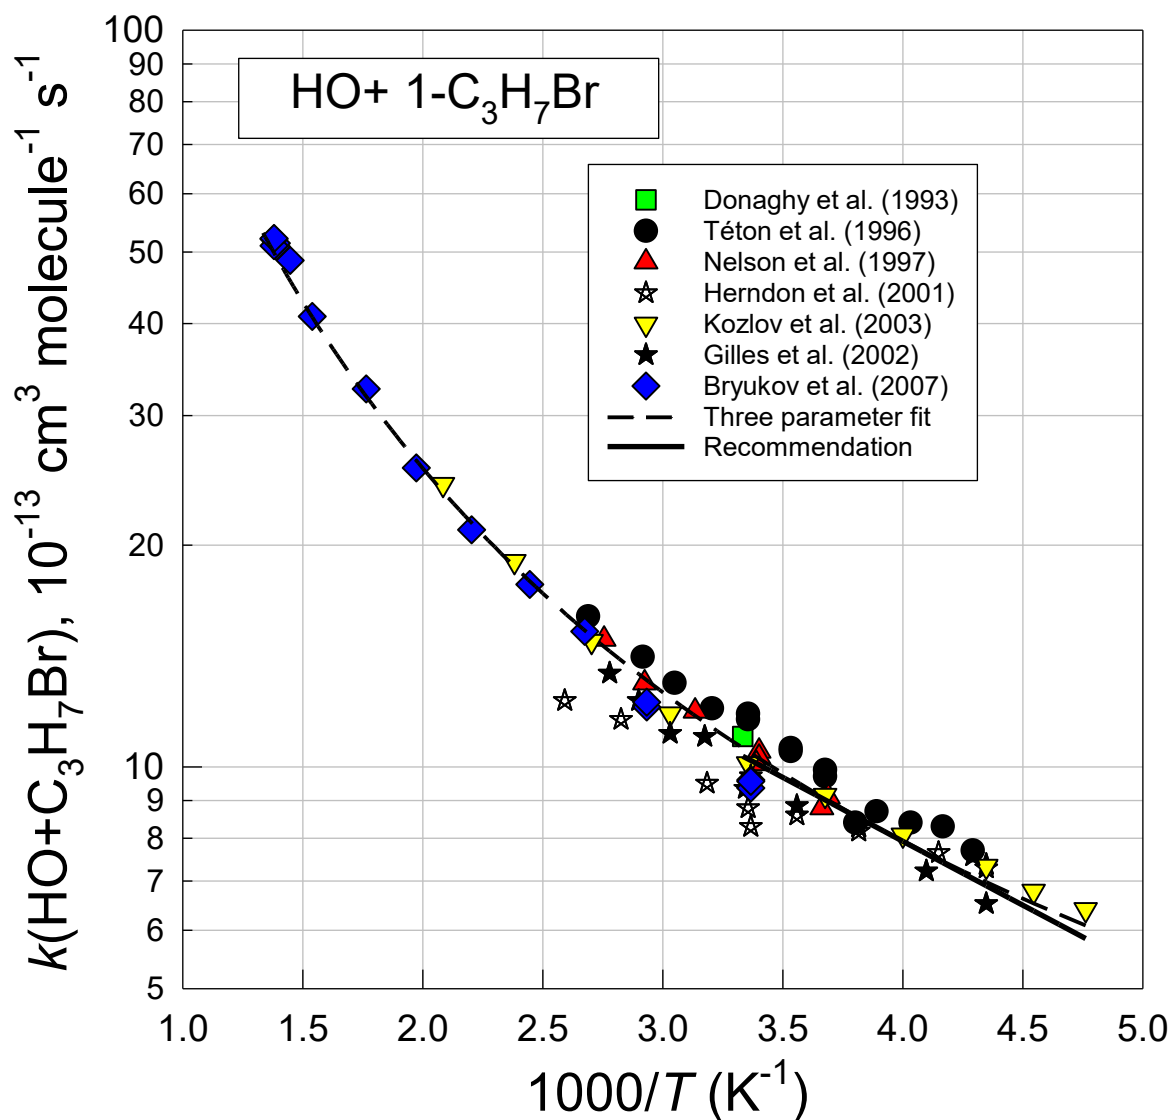

931  
 932

933 **oBrOx20: HO + CH<sub>3</sub>CHBrCH<sub>3</sub>**  
 934 Last evaluated: June 2025; Last change in preferred values: June 2009.

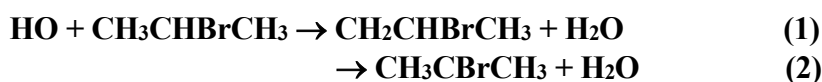

939 **Rate coefficient data ( $k = k_1 + k_2$ )**  
 940

| $k/\text{cm}^3 \text{ molecule}^{-1} \text{ s}^{-1}$    | $T/\text{K}$ | Reference             | Technique/ Comments |
|---------------------------------------------------------|--------------|-----------------------|---------------------|
| <i>Absolute Rate Coefficients</i>                       |              |                       |                     |
| $(3.58 \pm 0.47) \times 10^{-12} \exp[-(392 \pm 75)/T]$ | 233-372      | Téton et al. (1996)   | PLP-LIF (a)         |
| $9.42 \times 10^{-13}$                                  | 298          |                       |                     |
| $7.0 \times 10^{-14} T^{0.5} \exp(-145/T)$              | 215-402      | Herndon et al. (2001) | PLP-LIF (b)         |
| $(7.45 \pm 0.15) \times 10^{-13}$                       | 298          |                       |                     |
| $1.66 \times 10^{-13} (T/298)^{2.95} \exp(461/T)$       | 210-480      | Kozlov et al. (2003)  | FP-RF (c)           |
| $(7.58 \pm 0.12) \times 10^{-13}$                       | 298          |                       |                     |
| $1.56 \times 10^{-17} T^{4.18} \exp(922/T)$             | 297-715      | Bryukov et al. (2007) | PLP-LIF (d)         |
| $7.53 \times 10^{-13}$                                  | 297          |                       |                     |
| <i>Relative Rate Coefficients</i>                       |              |                       |                     |
| $(8.16 \pm 0.35) \times 10^{-13}$                       | 298          | Donaghy et al. (1993) | RR (e)              |

941 **Comments**

- 942  
 943  
 944 (a) The value at 298 K is the average of the five determinations reported by Téton et al. (1996) at  
 945 this temperature.  
 946 (b) HO radicals were produced by the photolysis of HONO at 355 nm (third harmonic Nd:YAG  
 947 laser) in approximately 100 Torr (133 mbar) of helium.  
 948 (c) HO radicals were generated by the photolysis of H<sub>2</sub>O using a xenon flash lamp. Experiments  
 949 were performed in 30 Torr (4 mbar) of argon.  
 950 (d) The value at 297 K is the average of the five determinations reported by Bryukov et al. (2003)  
 951 at this temperature.  
 952 (e) The rate coefficient ratio  $k(\text{HO} + \text{C}_3\text{H}_5\text{Br})/k(\text{HO} + \text{cyclohexane}) = 0.117 \pm 0.005$  was placed on  
 953 an absolute basis using  $k(\text{HO} + \text{cyclohexane}) = 3.26 \times 10^{-17} T^2 \exp(-262/T) \text{ cm}^3 \text{ molecule}^{-1} \text{ s}^{-1}$   
 954 (Atkinson, 2003).  
 955

956 **Preferred Values**  
 957

| Parameter                                            | Value                               | $T/\text{K}$ |
|------------------------------------------------------|-------------------------------------|--------------|
| $k/\text{cm}^3 \text{ molecule}^{-1} \text{ s}^{-1}$ | $7.58 \times 10^{-13}$              | 298          |
| $k/\text{cm}^3 \text{ molecule}^{-1} \text{ s}^{-1}$ | $1.96 \times 10^{-12} \exp(-283/T)$ | 210-335      |
| <i>Reliability</i>                                   |                                     |              |
| $\Delta \log k$                                      | 0.06                                | 298          |
| $\Delta E/R$                                         | $\pm 200$                           | 210-335      |

960 **Comments on Preferred Values**  
 961  
 962

963 The rate coefficients obtained in the absolute rate studies by Herndon et al. (2001), Kozlov et al.  
 964 (2003), and Bryukov et al. (2003) and in the relative rate study by Donaghy et al. (1993) are in  
 965 good agreement over the temperature ranges where comparison is possible. Results from the

966 absolute rate study by Téton et al. (1996) lie approximately 20% above those from the other  
 967 studies with a similar dependence on temperature. The three parameter equation  $k = CT^2 \exp(-$   
 968  $D/T)$  is not able to capture the magnitude of the curvature evident in the Arrhenius plot. Fitting a  
 969 double Arrhenius expression of  $k = A \exp(-B/T) + C \exp(-D/T)$  to the composite data set  
 970 (excluding the data from Téton et al. (1996)) gives  $k = 1.07 \times 10^{-10} \exp(-2413/T) + 1.66 \times 10^{-$   
 971  $12 \exp(-246/T) \text{ cm}^3 \text{ molecule}^{-1} \text{ s}^{-1}$  which provides a good description of the reported rate  
 972 coefficients over the temperature range 210-720 K. For inclusion into atmospheric chemistry  
 973 models we prefer the Arrhenius expression  $k = 1.96 \times 10^{-12} \exp(-283/T) \text{ cm}^3 \text{ molecule}^{-1} \text{ s}^{-1}$   
 974 obtained by fitting the Arrhenius expression to the data from Donaghy et al. (1993), Herndon  
 975 et al. (2001), Kozlov et al. (2003), and Bryukov et al. (2003) over the range 210-335 K.

## 976 977 978 979 980 981 982 983 984 985 986

- Atkinson, R.: Atmos. Chem. Phys., 3, 2233, 2003.  
 Bryukov, M. G., Vidrine, R. G., and Dillinger, B.: J. Phys. Chem. A, 111, 6197, 2007.  
 Donaghy, T., Shanahan, I., Hande, M., and Fitzpatrick, S.: Int. J. Chem. Kinet., 25, 273, 1993.  
 Herndon, S. C., Gierczak, T., Talukdar, R. K., and Ravishankara, A. R.: Phys. Chem. Chem.  
 Phys., 3 4529, 2001.  
 Kozlov, S. N., Orkin, V. L., Huie, R. E., and Kurylo, M. J.: J. Phys. Chem. A, 107, 1333, 2003.  
 Téton, S., El Boudali, A., and Mellouki, A.: J. Chim. Phys., 93, 274, 1996.

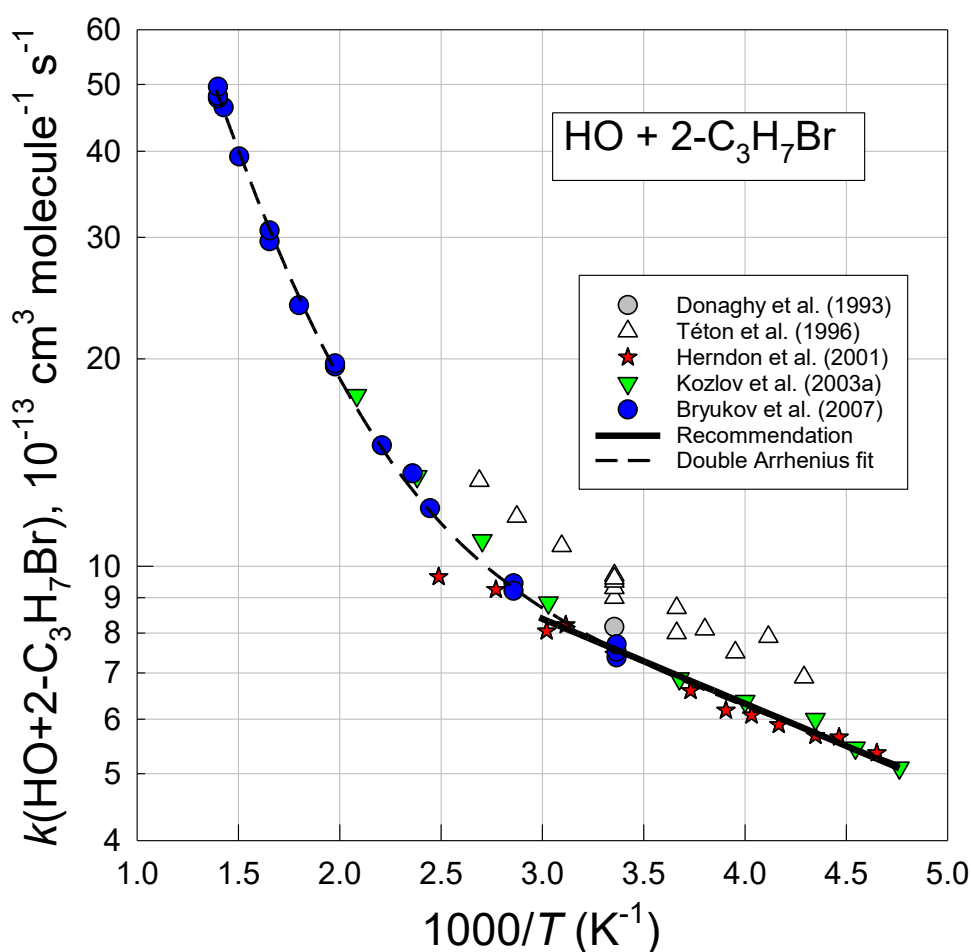

987  
988

989 **oBrOx21: HO + CH<sub>3</sub>CH<sub>2</sub>CH<sub>2</sub>CH<sub>2</sub>Br**  
990 Last evaluated: June 2025; Last change in preferred values: June 2009.

991 **HO + CH<sub>3</sub>CH<sub>2</sub>CH<sub>2</sub>CH<sub>2</sub>Br → products**

992 **Rate coefficient data**

| <i>k</i> /cm <sup>3</sup> molecule <sup>-1</sup> s <sup>-1</sup> | <i>T</i> /K | Reference             | Technique/ Comments |
|------------------------------------------------------------------|-------------|-----------------------|---------------------|
| <i>Relative Rate Coefficients</i>                                |             |                       |                     |
| (2.29 ± 0.07) × 10 <sup>-12</sup>                                | 299         | Donaghy et al. (1993) | RR (a)              |

996 **Comments**

997  
998  
999 (a) The rate coefficient ratio  $k(\text{HO}+\text{C}_4\text{H}_9\text{Br})/k(\text{HO}+\text{cyclohexane}) = 0.327 \pm 0.010$  was placed on  
1000 an absolute basis using  $k(\text{HO}+\text{cyclohexane}) = 3.26 \times 10^{-17} T^2 \exp(-262/T) \text{ cm}^3 \text{ molecule}^{-1} \text{ s}^{-1}$   
1001 (Atkinson, 2003).

1002 **Preferred Values**

| Parameter                                                        | Value                   | <i>T</i> /K |
|------------------------------------------------------------------|-------------------------|-------------|
| <i>k</i> /cm <sup>3</sup> molecule <sup>-1</sup> s <sup>-1</sup> | 2.3 × 10 <sup>-12</sup> | 298         |
| <i>Reliability</i>                                               |                         |             |
| $\Delta \log k$                                                  | 0.20                    | 298         |

1003 *Comments on Preferred Values*

1004  
1005  
1006  
1007  
1008 The rate coefficient reported by Donaghy et al. (1993) at 299 K is the sole study and the basis of  
1009 the preferred value. There are no product studies of this reaction.

1010 **References**

1011 Atkinson, R.: Atmos. Chem. Phys., 3, 2233, 2003.  
1012 Donaghy, T., Shanahan, I., Hande, M., and Fitzpatrick, S.: Int. J. Chem. Kinet., 25, 273,  
1013 1993.

1019 **oBrOx22: HO + CH<sub>3</sub>CH<sub>2</sub>CH<sub>2</sub>CH<sub>2</sub>CH<sub>2</sub>Br**  
1020 Last evaluated: June 2025; Last change in preferred values: June 2009.

1021  
1022 **HO + CH<sub>3</sub>CH<sub>2</sub>CH<sub>2</sub>CH<sub>2</sub>CH<sub>2</sub>Br → products**

1023  
1024 **Rate coefficient data**

1025

| <i>k</i> /cm <sup>3</sup> molecule <sup>-1</sup> s <sup>-1</sup> | <i>T</i> /K | Reference             | Technique/ Comments |
|------------------------------------------------------------------|-------------|-----------------------|---------------------|
| <i>Relative Rate Coefficients</i>                                |             |                       |                     |
| (3.71 ± 0.13) × 10 <sup>-12</sup>                                | 304         | Donaghy et al. (1993) | RR (a)              |

1026  
1027 **Comments**

1028  
1029 (a) The rate coefficient ratio  $k(\text{HO}+\text{C}_5\text{H}_{11}\text{Br})/k(\text{HO}+\text{cyclohexane}) = 0.520 \pm 0.018$  was placed on  
1030 an absolute basis using  $k(\text{HO}+\text{cyclohexane}) = 3.26 \times 10^{-17} T^2 \exp(-262/T)$  cm<sup>3</sup> molecule<sup>-1</sup> s<sup>-1</sup>  
1031 (Atkinson, 2003).

1032  
1033 **Preferred Values**

1034

| Parameter                                                        | Value                   | <i>T</i> /K |
|------------------------------------------------------------------|-------------------------|-------------|
| <i>k</i> /cm <sup>3</sup> molecule <sup>-1</sup> s <sup>-1</sup> | 3.7 × 10 <sup>-12</sup> | 298         |
| <i>Reliability</i>                                               |                         |             |
| Δ log <i>k</i>                                                   | 0.20                    | 298         |

1035  
1036  
1037 *Comments on Preferred Values*

1038  
1039  
1040 The rate coefficient reported by Donaghy et al. (1993) at 304 K is the sole study and the basis  
1041 of the preferred value. There are no product data available for this reaction.

1042  
1043 **References**

1044  
1045 Atkinson, R.: Atmos. Chem. Phys., 3, 2233, 2003.  
1046 Donaghy, T., Shanahan, I., Hande, M., and Fitzpatrick, S.: Int. J. Chem. Kinet., 25, 273,  
1047 1993.  
1048

1049 **oBrOx23: HO + CH<sub>3</sub>CH<sub>2</sub>CH<sub>2</sub>CH<sub>2</sub>CH<sub>2</sub>CH<sub>2</sub>Br**  
1050 Last evaluated: June 2025; Last change in preferred values: June 2009.

1051  
1052 **HO + CH<sub>3</sub>CH<sub>2</sub>CH<sub>2</sub>CH<sub>2</sub>CH<sub>2</sub>CH<sub>2</sub>Br → products**  
1053  
1054 **Rate coefficient data**  
1055

| <i>k</i> /cm <sup>3</sup> molecule <sup>-1</sup> s <sup>-1</sup> | <i>T</i> /K | Reference             | Technique/ Comments |
|------------------------------------------------------------------|-------------|-----------------------|---------------------|
| <i>Relative Rate Coefficients</i>                                |             |                       |                     |
| (5.48 ± 0.19) × 10 <sup>-12</sup>                                | 306         | Donaghy et al. (1993) | RR (a)              |

1056  
1057 **Comments**

1058  
1059 (a) The rate coefficient ratio  $k(\text{HO}+\text{C}_6\text{H}_{13}\text{Br})/k(\text{HO}+\text{cyclohexane}) = 0.763 \pm 0.027$  was placed on  
1060 an absolute basis using  $k(\text{HO}+\text{cyclohexane}) = 3.26 \times 10^{-17} T^2 \exp(-262/T)$  cm<sup>3</sup> molecule<sup>-1</sup> s<sup>-1</sup>  
1061 (Atkinson, 2003).

1062  
1063 **Preferred Values**

| Parameter                                                        | Value                   | <i>T</i> /K |
|------------------------------------------------------------------|-------------------------|-------------|
| <i>k</i> /cm <sup>3</sup> molecule <sup>-1</sup> s <sup>-1</sup> | 5.5 × 10 <sup>-12</sup> | 298         |
| <i>Reliability</i><br>Δ log <i>k</i>                             | ± 0.20                  | 298         |

1067  
1068 *Comments on Preferred Values*

1069  
1070 The rate coefficient reported by Donaghy et al. (1993) at 306 K is the sole study and the basis  
1071 of the preferred value. There are no product data available for this reaction.

1072  
1073 **References**

1074  
1075 Atkinson, R.: Atmos. Chem. Phys., 3, 2233, 2003.  
1076 Donaghy, T., Shanahan, I., Hande, M., and Fitzpatrick, S.: Int. J. Chem. Kinet., 25, 273,  
1077 1993.  
1078

1081  
1082  
1083  
1084  
1085  
1086

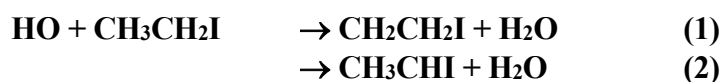

**Rate coefficient data ( $k = k_1 + k_2$ )**

| $k/\text{cm}^3 \text{ molecule}^{-1} \text{ s}^{-1}$ | $T/\text{K}$ | Reference            | Technique/<br>Comments |
|------------------------------------------------------|--------------|----------------------|------------------------|
| <i>Absolute Rate Coefficients</i>                    |              |                      |                        |
| $5.55 \times 10^{-12} \exp[-(830 \pm 90)/T]$         | 297-372      | Zhang et al. (2012)  | FP-RF (a)              |
| $(3.24 \pm 0.08) \times 10^{-13}$                    | 298          |                      |                        |
| <i>Relative Rate Coefficients</i>                    |              |                      |                        |
| $(7.7 \pm 1.0) \times 10^{-13}$                      | 298          | Cotter et al. (2003) | DF-RF (b)              |

1087  
1088  
1089

**Comments**

- (a) HO radicals were generated by the VUV flash photolysis of H<sub>2</sub>O in 188 Torr (250 mbar) of helium. HO radicals were monitored using resonance fluorescence at 308 nm.
- (b) HO radicals were generated by the reaction of H atoms with NO<sub>2</sub> in 1.5 or 5.0 Torr (2.0 or 6.7 mbar) of helium diluent at  $298 \pm 2$  K. There was no discernable effect of total pressure over the range studied. It was recognized that the measured rate coefficient of  $k(\text{HO} + \text{C}_2\text{H}_5\text{I}) = (7.7 \pm 1.0) \times 10^{-13} \text{ cm}^3 \text{ molecule}^{-1} \text{ s}^{-1}$  could be an overestimation because of secondary loss of HO radicals via reaction with products of the HO + C<sub>2</sub>H<sub>5</sub>I reaction. Cotter et al. (2003) estimated that correction of the rate coefficient for possible additional loss of HO radicals via secondary reactions in their experiments would lower the rate coefficient to  $5.5 \times 10^{-13} \text{ cm}^3 \text{ molecule}^{-1} \text{ s}^{-1}$ .

1090  
1091  
1092  
1093  
1094  
1095  
1096  
1097  
1098  
1099  
1100  
1101

**Preferred Values**

| Parameter                                            | Value                               | $T/\text{K}$ |
|------------------------------------------------------|-------------------------------------|--------------|
| $k/\text{cm}^3 \text{ molecule}^{-1} \text{ s}^{-1}$ | $3.43 \times 10^{-13}$              | 298          |
| $k/\text{cm}^3 \text{ molecule}^{-1} \text{ s}^{-1}$ | $5.55 \times 10^{-12} \exp(-830/T)$ | 290-380      |
| <i>Reliability</i>                                   |                                     |              |
| $\Delta \log k$                                      | 0.10                                | 298          |
| $\Delta E/R$                                         | 200                                 | 298          |

1102  
1103  
1104  
1105  
1106

*Comments on Preferred Values*

The rate coefficient at 298 K reported by Cotter et al. (2003) is significantly larger than that reported by Zhang et al. (2012). Cotter et al. (2003) considered their determination to be an upper limit because of the likely contribution of secondary reactions to the observed HO loss. The preferred expression is taken from Zhang et al. (2012) and gives  $k(\text{HO} + \text{C}_2\text{H}_5\text{I}) = 3.43 \times 10^{-13} \text{ cm}^3 \text{ molecule}^{-1} \text{ s}^{-1}$  at 298 K.

1107  
1108  
1109  
1110  
1111  
1112

**References**

1113  
1114  
1115 Cotter, E. S. N., Canosa-Mas, C.E., Manners, C. R., Wayne, R. P., and Shallcross, D. E.: Atmos.

1116 Environ., 37, 1125, 2003.  
1117 Zhang, S., Strekowski, R.S., Monod, A., Bosland, L., and Zetzsch, C.: J. Phys. Chem. A, 116, 9497,  
1118 2012.  
1119  
1120

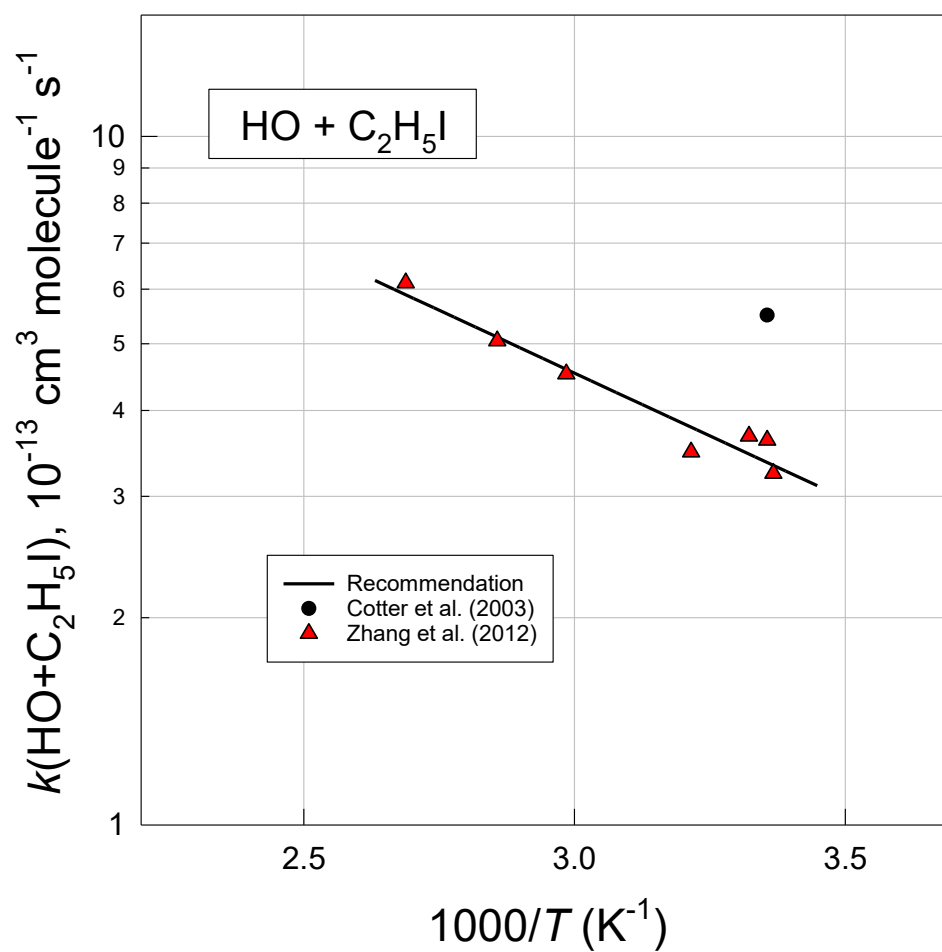

1121  
1122

1123 **oIOx5: HO + CH<sub>3</sub>CH<sub>2</sub>CH<sub>2</sub>I**  
 1124 Last evaluated: June 2025; Last change in preferred values: June 2014

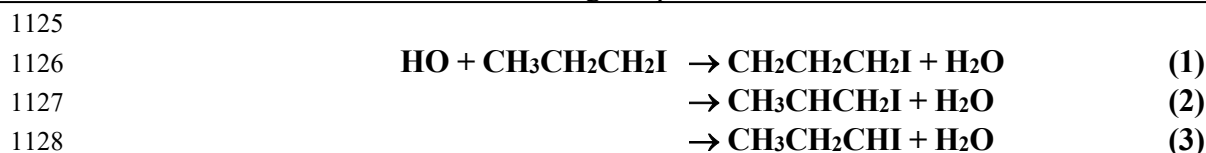

1129  
 1130 **Rate coefficient data ( $k = k_1 + k_2 + k_3$ )**  
 1131

| $k/\text{cm}^3 \text{ molecule}^{-1} \text{ s}^{-1}$ | $T/\text{K}$ | Reference               | Technique/<br>Comments |
|------------------------------------------------------|--------------|-------------------------|------------------------|
| <i>Absolute Rate Coefficients</i>                    |              |                         |                        |
| $(1.47 \pm 0.08) \times 10^{-12}$                    | 298          | Carl and Crowley (2001) | PLP-RF (a)             |
| $1.65 \times 10^{-11} \exp[-(780 \pm 90)/T]$         | 300-370      | Zhang et al. (2012)     | FP-RF (b)              |
| $(1.24 \pm 0.06) \times 10^{-12}$                    | 300          |                         |                        |
| <i>Relative Rate Coefficients</i>                    |              |                         |                        |
| $(2.5 \pm 0.3) \times 10^{-12}$                      | 298          | Cotter et al. (2003)    | DF-RF (c)              |

1132  
 1133 **Comments**

- 1134  
 1135 (a) HO radicals were generated by the two photon 439.44 nm (Nd-YAG pumped dye laser) photolysis  
 1136 of NO<sub>2</sub> (generating O(<sup>1</sup>D) and O(<sup>3</sup>P) atoms) in the presence of H<sub>2</sub>. Experiments were conducted in  
 1137 20 Torr (27 mbar) of argon diluent. HO radicals were monitored using resonance fluorescence at 308  
 1138 nm.  
 1139 (b) HO radicals were generated by the VUV flash photolysis of H<sub>2</sub>O in 188 Torr (250 mbar) of helium  
 1140 diluent. HO radicals were monitored using resonance fluorescence at 308 nm.  
 1141 (c) HO radicals were generated by the reaction of H atoms with NO<sub>2</sub> in 1.5 or 5.0 Torr (2.0 or 6.7 mbar)  
 1142 of helium diluent at  $298 \pm 2$  K. There was no discernible effect of total pressure over the range  
 1143 studied. It was noted that the measured rate coefficient could be an upper limit to  $k(\text{HO}+\text{C}_3\text{H}_7\text{I})$   
 1144 because of additional loss of HO radicals via reaction with products of the HO+C<sub>3</sub>H<sub>7</sub>I reaction.  
 1145 Cotter et al. (2003) estimated that correction of the rate coefficient for possible additional loss of HO  
 1146 radicals via secondary reactions would lower the rate coefficient to  $1.8 \times 10^{-12} \text{ cm}^3 \text{ molecule}^{-1} \text{ s}^{-1}$ .

1147  
 1148 **Preferred Values**

| Parameter                                            | Value                               | $T/\text{K}$ |
|------------------------------------------------------|-------------------------------------|--------------|
| $k/\text{cm}^3 \text{ molecule}^{-1} \text{ s}^{-1}$ | $1.86 \times 10^{-11} \exp(-780)/T$ | 290 -380     |
| $k/\text{cm}^3 \text{ molecule}^{-1} \text{ s}^{-1}$ | $1.36 \times 10^{-12}$              | 298          |
| <i>Reliability</i>                                   |                                     |              |
| $\Delta \log k$                                      | 0.08                                | 298          |
| $\Delta E/R$                                         | 200                                 | 290 -380     |

1152  
 1153 **Comments on Preferred Values**

1154  
 1155 Recognizing the possible contribution of secondary loss of HO radicals, Cotter et al. (2003)  
 1156 considered their rate coefficient determination to be an upper limit. The value derived by Cotter et al.  
 1157 (2003) corrected for possible secondary reactions is consistent, within the combined experimental  
 1158 uncertainties, with that from Carl and Crowley (2001) and Zhang et al. (2012). The results from Carl and

1159 Crowley (2001) and Zhang et al. (2012) are in good agreement within the combined uncertainties. Our  
1160 preferred value at 298 K is the average from Carl and Crowley (2001) and Zhang et al. (2012). The  
1161 temperature dependence is taken from a fit to the work by Zhang et al. (2012) with the A-factor adjusted  
1162 to reproduce the preferred value at 298 K.

1163  
1164  
1165  
1166  
1167  
1168  
1169  
1170  
1171  
1172

### References

- Carl, S. A., and Crowley, J. N.: Atmos. Chem. Phys., 1, 1, 2001.  
Cotter, E. S. N., Canosa-Mas, C.E., Manners, C. R., Wayne, R. P., and Shallcross, D. E.: Atmos.  
Environ., 37, 1125, 2003.  
Zhang, S., Strekowski, R.S., Monod, A., Bosland, L., and Zetzsch, C.: J. Phys. Chem. A, 116, 9497,  
2012.

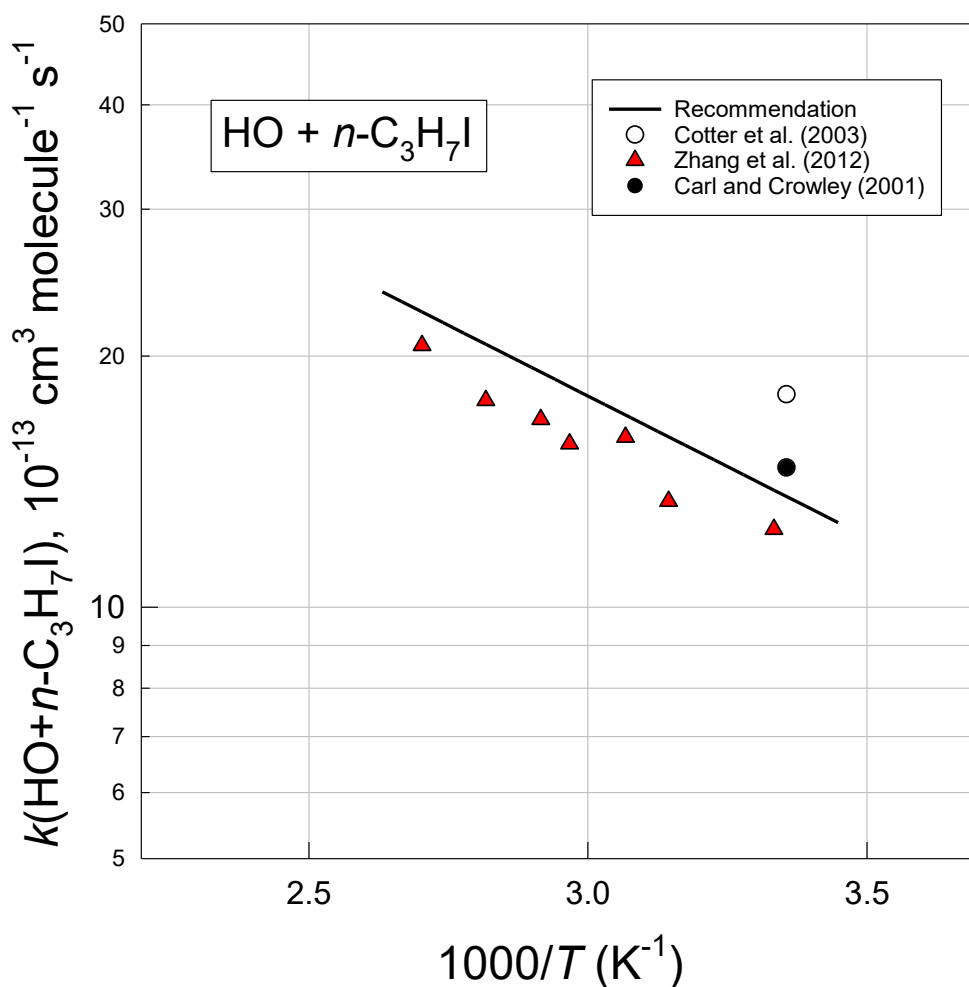

1173  
1174

1175 **oIOx6: HO + CH<sub>3</sub>CHICH<sub>3</sub>**  
 1176 Last evaluated: June 2025; Last change in preferred values: June 2014

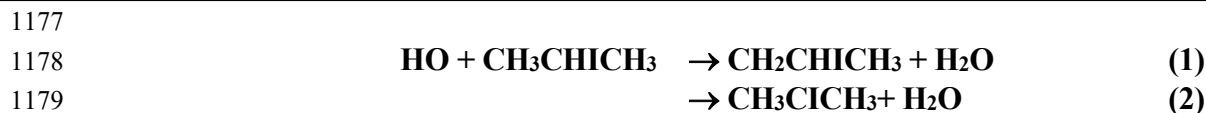

1181 **Rate coefficient data ( $k = k_1 + k_2$ )**  
 1182

| $k/\text{cm}^3 \text{ molecule}^{-1} \text{ s}^{-1}$ | $T/\text{K}$ | Reference               | Technique/<br>Comments |
|------------------------------------------------------|--------------|-------------------------|------------------------|
| <i>Absolute Rate Coefficients</i>                    |              |                         |                        |
| $(1.22 \pm 0.06) \times 10^{-12}$                    | 298          | Carl and Crowley (2001) | PLP-RF (a)             |
| $7.58 \times 10^{-12} \exp[-(530 \pm 80)/T]$         | 300-370      | Zhang et al. (2012)     | FP-RF (b)              |
| $(1.35 \pm 0.07) \times 10^{-12}$                    | 299          |                         |                        |
| <i>Relative Rate Coefficients</i>                    |              |                         |                        |
| $(1.6 \pm 0.2) \times 10^{-12}$                      | 298          | Cotter et al. (2003)    | DF-RF (c)              |

1183

1184 **Comments**

- 1185 (a) HO radicals were generated by either the two photon 439.44 nm (Nd-YAG pumped dye laser)  
 1186 photolysis of NO<sub>2</sub> (generating O(<sup>1</sup>D) and O(<sup>3</sup>P) atoms) in the presence of H<sub>2</sub>, or the photolysis of  
 1187 HNO<sub>3</sub> at 248 nm. Experiments were conducted in 20 Torr (27 mbar) of argon. HO radicals were  
 1188 monitored using resonance fluorescence.
- 1189 (b) HO radicals were generated by the VUV flash photolysis of H<sub>2</sub>O in 188 Torr (250 mbar) of helium  
 1190 diluent. HO radicals were monitored using resonance fluorescence at 308 nm.
- 1191 (c) HO radicals were generated by the reaction of H atoms with NO<sub>2</sub> in 1.5 or 5.0 Torr (2.0 or 6.7 mbar)  
 1192 of helium diluent at  $298 \pm 2$  K. There was no discernible effect of total pressure over the range  
 1193 studied. It is possible that the measured rate coefficient is an overestimation of  $k(\text{HO}+i\text{-C}_3\text{H}_7\text{I})$   
 1194 because of additional loss of HO radicals via reaction with products of the HO+*i*-C<sub>3</sub>H<sub>7</sub>I reaction.  
 1195 While secondary chemistry should manifest itself in curvature of the first order ( $\ln([\text{HO}]_0/[\text{HO}]_t$   
 1196 versus time) plots, Cotter et al. (2003) calculated that such curvature would not be discernable given  
 1197 the data scatter. Cotter et al. (2003) estimated that correction of the rate coefficient for possible  
 1198 additional loss of HO radicals via secondary reactions would lower the rate coefficient to  $1.1 \times 10^{-12}$   
 1199  $\text{cm}^3 \text{ molecule}^{-1} \text{ s}^{-1}$ .

1200

1201 **Preferred Values**

1202

| Parameter                                              | Value                               | T/K     |
|--------------------------------------------------------|-------------------------------------|---------|
| $k / \text{cm}^3 \text{ molecule}^{-1} \text{ s}^{-1}$ | $7.64 \times 10^{-12} \exp(-530)/T$ | 290-380 |
| $k / \text{cm}^3 \text{ molecule}^{-1} \text{ s}^{-1}$ | $1.29 \times 10^{-12}$              | 298     |
| <i>Reliability</i>                                     |                                     |         |
| $\Delta \log k$                                        | $\pm 0.08$                          | 298     |

1205

1206 *Comments on Preferred Values*

1207

1208 Recognizing the possible contribution of secondary loss of HO radicals, Cotter et al. (2003)  
 1209 considered their rate coefficient determination to be an upper limit. The value derived by Cotter et al.  
 1210 (2003) corrected for possible secondary reactions is consistent with those from Carl and Crowley (2001)  
 1211 and Zhang et al. (2012). The results from Carl and Crowley (2001) and Zhang et al. (2012) are in good

1212 agreement within the combined uncertainties. Our recommended value at 298 K is the average from Carl  
1213 and Crowley (2001) and Zhang et al. (2012). The temperature dependence is taken from a fit to the work  
1214 by Zhang et al. (2012) with the A-factor adjusted to reproduce the recommended value at 298 K.  
1215

### 1216 References

1217 Carl, S. A., and Crowley, J. N.: Atmos. Chem. Phys., 1, 1, 2001.  
1218 Cotter, E. S. N., Canosa-Mas, C.E., Manners, C. R., Wayne, R. P., and Shallcross, D. E.: Atmos.  
1219 Environ., 37, 1125, 2003.  
1220 Zhang, S., Strekowski, R.S., Monod, A., Bosland, L., and Zetzsch, C.: J. Phys. Chem. A, 116, 9497,  
1221 2012.  
1222  
1223

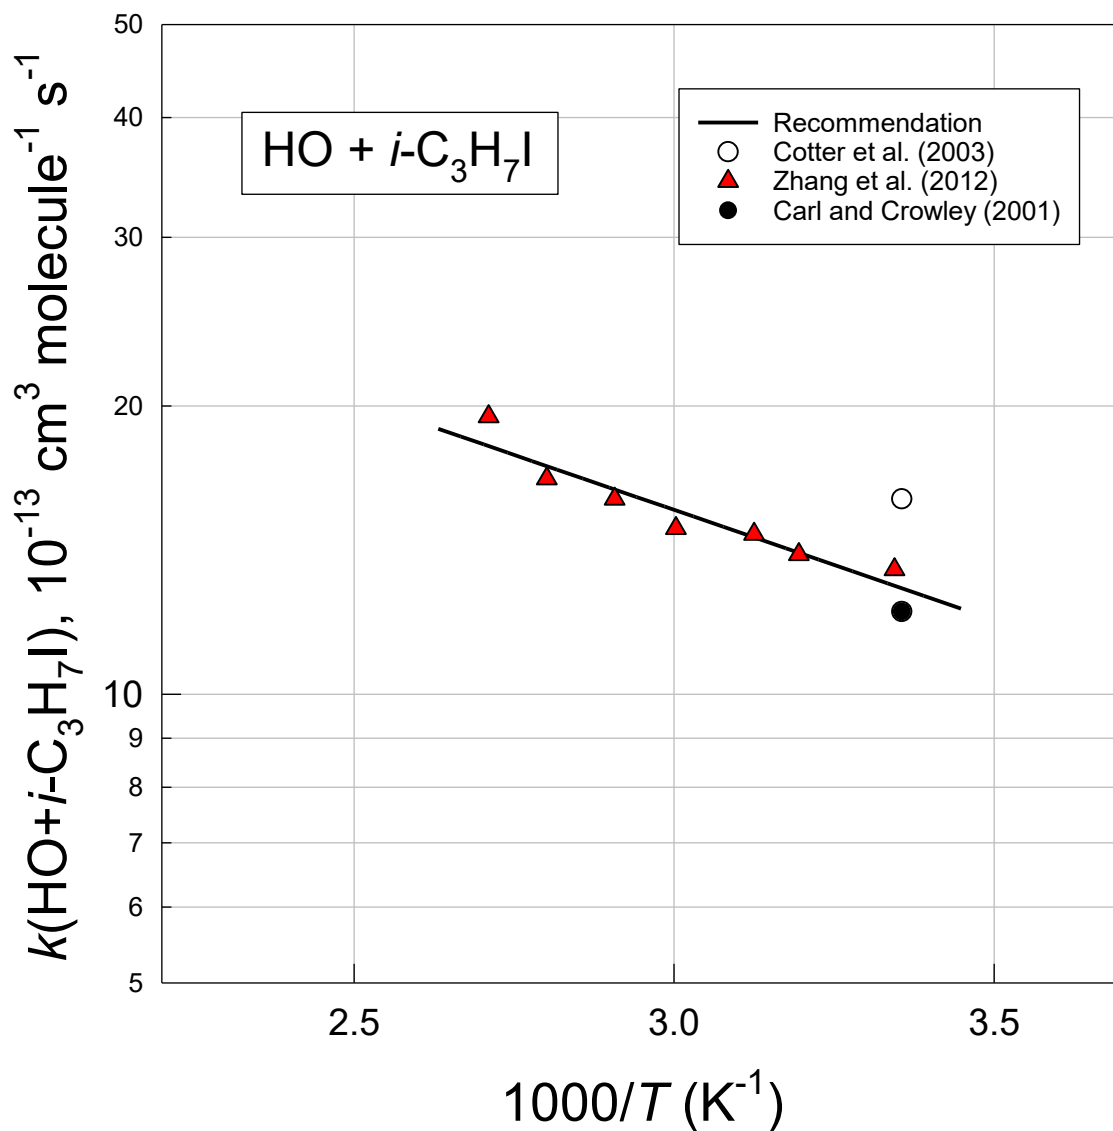

1224  
1225  
1226

1227 **oFOx108: Cl + CHF<sub>2</sub>CH<sub>2</sub>CF<sub>3</sub> (HFC-245fa)**  
1228 Last evaluated: June 2025; Last change in preferred values: September 2011.

1229

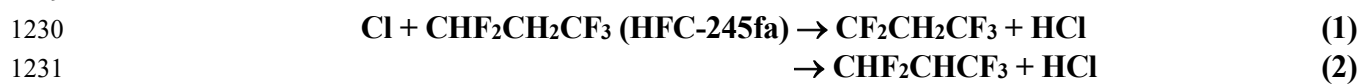

1232

1233

1234

1235

**Rate coefficient data ( $k = k_1 + k_2$ )**

| $k/\text{cm}^3 \text{ molecule}^{-1} \text{ s}^{-1}$ | $T/\text{K}$ | Reference          | Technique/ Comments |
|------------------------------------------------------|--------------|--------------------|---------------------|
| <i>Relative Rate Coefficients</i>                    |              |                    |                     |
| $(6.89 \pm 0.81) \times 10^{-15}$                    | 297          | Chen et al. (1997) | (a)                 |

1236

1237

1238

**Comments**

1239 (a) Cl atoms were generated by the photolysis of Cl<sub>2</sub> in CHF<sub>2</sub>CH<sub>2</sub>CF<sub>3</sub>/CF<sub>3</sub>CHClF/Cl<sub>2</sub> mixtures in  
1240 700 Torr (933 mbar) of N<sub>2</sub>. The decays of CHF<sub>2</sub>CH<sub>2</sub>CF<sub>3</sub>/CF<sub>3</sub>CHClF were measured by FTIR  
1241 spectroscopy. The measured rate coefficient ratio of  $k(\text{Cl}+\text{CHF}_2\text{CH}_2\text{CF}_3)/k(\text{Cl}+\text{CF}_3\text{CHClF}) =$   
1242  $2.55 \pm 0.30$  was placed on an absolute basis using  $k(\text{Cl}+\text{CF}_3\text{CHClF}) = 2.7 \times 10^{-15} \text{ cm}^3$   
1243  $\text{molecule}^{-1} \text{ s}^{-1}$  (Atkinson et al., 2008).

1244

1245

1246

**Preferred Values**

| Parameter                                              | Value                 | $T/\text{K}$ |
|--------------------------------------------------------|-----------------------|--------------|
| $k / \text{cm}^3 \text{ molecule}^{-1} \text{ s}^{-1}$ | $6.9 \times 10^{-15}$ | 298          |
| <i>Reliability</i>                                     |                       |              |
| $\Delta \log k$                                        | $\pm 0.30$            | 298          |

1247

1248

1249

1250

1251 *Comments on Preferred Values*

1252

1253 The preferred value is based on the study by Chen et al. (1997).

1254

1255

1256

**References**

1257 Atkinson, R., Baulch, D. L., Cox, R. A., Crowley, J. N., Hampson, R. F., Hynes, R. G., Jenkin, M. E.,  
1258 Rossi, M. J., Troe, J., and Wallington, T. J.: Atmos. Chem. Phys., 9, 4141, 2008; IUPAC Task  
1259 Group on Atmospheric Chemical Kinetic Data Evaluation, <https://iupac.aeris-data.fr/>.  
1260 Chen, J., Young, V., Niki, H., and Magid, H.: J. Phys. Chem., A, 101, 2648, 1997.

1261

1262 **oFOx110: Cl + CF<sub>3</sub>CHF<sub>2</sub>CF<sub>3</sub> (HFC-227ea)**  
 1263 Last evaluated: June 2025; Last change in preferred values: September 2011

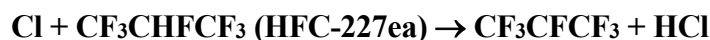

1265 **Rate coefficient data (*k*)**

| <i>k</i> /cm <sup>3</sup> molecule <sup>-1</sup> s <sup>-1</sup> | <i>T</i> /K | Reference               | Technique/<br>Comments |
|------------------------------------------------------------------|-------------|-------------------------|------------------------|
| <i>Relative Rate Coefficients</i>                                |             |                         |                        |
| (4.68 ± 0.52) × 10 <sup>-16</sup>                                | 296         | Møgelberg et al. (1996) | (a)                    |
| (4.10 ± 0.63) × 10 <sup>-16</sup>                                | 296         |                         | (b)                    |

1269 **Comments**

- 1270  
 1271  
 1272 (a) Cl atoms were generated by the photolysis of Cl<sub>2</sub> in CF<sub>3</sub>CHF<sub>2</sub>CF<sub>3</sub>/CHF<sub>2</sub>CF<sub>3</sub>/Cl<sub>2</sub> and  
 1273 CF<sub>3</sub>CHF<sub>2</sub>CF<sub>3</sub>/CHF<sub>2</sub>CF<sub>2</sub>CF<sub>3</sub>/Cl<sub>2</sub> mixtures in 700 Torr (933 mbar) of N<sub>2</sub> or air diluent. The loss of the  
 1274 reactant and reference compounds was measured by FTIR spectroscopy. The measured rate  
 1275 coefficient ratios of  $k(\text{Cl}+\text{CF}_3\text{CHF}_2\text{CF}_3)/k(\text{Cl}+\text{CHF}_2\text{CF}_3) = 0.18 \pm 0.02$  and  
 1276  $k(\text{Cl}+\text{CF}_3\text{CHF}_2\text{CF}_3)/k(\text{Cl}+\text{CHF}_2\text{CF}_2\text{CF}_3) = 0.13 \pm 0.02$  were placed on an absolute basis using  
 1277  $k(\text{Cl}+\text{CHF}_2\text{CF}_3) = 2.6 \times 10^{-15} \text{ cm}^3 \text{ molecule}^{-1} \text{ s}^{-1}$  (Atkinson et al., 2008) and  $k(\text{Cl}+\text{CHF}_2\text{CF}_2\text{CF}_3) =$   
 1278  $3.15 \times 10^{-16} \text{ cm}^3 \text{ molecule}^{-1} \text{ s}^{-1}$  (Giessing et al., 1996).  
 1279 (b) Using CHF<sub>2</sub>CF<sub>2</sub>CF<sub>3</sub> as reference.

1280 **Preferred Values**

| Parameter                                                        | Value                   | <i>T</i> /K |
|------------------------------------------------------------------|-------------------------|-------------|
| <i>k</i> /cm <sup>3</sup> molecule <sup>-1</sup> s <sup>-1</sup> | 4.4 × 10 <sup>-16</sup> | 298         |
| <i>Reliability</i>                                               |                         |             |
| Δ log <i>k</i>                                                   | ± 0.15                  | 298         |

1281 **Comments on Preferred Values**

1282  
 1283  
 1284  
 1285  
 1286 The preferred value is the average of the relative rate determinations by Møgelberg et al. (1996).  
 1287  
 1288  
 1289

1290 **References**

- 1291  
 1292 Atkinson, R., Baulch, D. L., Cox, R. A., Crowley, J. N., Hampson, R. F., Hynes, R. G., Jenkin, M. E.,  
 1293 Rossi, M. J., Troe, J., and Wallington, T. J.: Atmos. Chem. Phys., 9, 4141, 2008; IUPAC Task Group  
 1294 on Chemical Kinetic Data Evaluation, <https://iupac.aeris-data.fr/>.  
 1295 Giessing, A. M. B., Feilberg, A., Møgelberg, T. E., Sehested, J., Bilde, M., Wallington, T. J., and Nielsen,  
 1296 O. J.: J. Phys. Chem., 100, 6572, 1996.  
 1297 Møgelberg, T. E., Sehested, J., Bilde, M., Wallington, T. J., and Nielsen, O.J.: J. Phys. Chem., 100, 8882,  
 1298 1996.  
 1299

1300  
1301  
1302  
1303  
1304  
1305  
1306  
1307  
1308

**oFOx111: Cl + CHF<sub>3</sub>**

Last evaluated: June 2025; Last change in preferred values: September 2011.

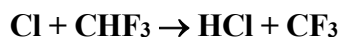

$\Delta H^\circ = 17.9 \text{ kJ mol}^{-1}$

**Rate coefficient data**

| <i>k</i> /cm <sup>3</sup> molecule <sup>-1</sup> s <sup>-1</sup> | Temp./K | Reference                 | Technique/ Comments |
|------------------------------------------------------------------|---------|---------------------------|---------------------|
| <i>Absolute Rate Coefficients</i>                                |         |                           |                     |
| $(4.3 \pm 1.5) \times 10^{-16}$                                  | 298     | Jourdain et al., 1976     | DF-MS (a)           |
| <i>Relative Rate Coefficients</i>                                |         |                           |                     |
| $4.6 \times 10^{-13} \exp[-(3520)/T]$                            | 303-399 | Coomber and Whittle, 1966 | RR (b)              |
| $3.4 \times 10^{-18}$                                            | 298     |                           |                     |

1309  
1310  
1311  
1312  
1313  
1314  
1315  
1316  
1317  
1318  
1319  
1320  
1321  
1322

**Comments**

- (a) Experiments were performed in 0.3-3 Torr of helium diluent.  
 (b) The reaction rate coefficients were measured using a competitive method with Cl atoms generated via photolysis of Cl<sub>2</sub> at 366 nm (mercury lamp). The expression in the table above was derived from the measured ratios  $k_{\text{CH}_4}/k_{\text{C}_2\text{F}_5\text{H}} = 12.4 \exp[(1450 \pm 40)/RT]$  and  $k_{\text{C}_2\text{F}_5\text{H}}/k_{\text{CHF}_3} = 1.16 \exp[(3080 \pm 70)/RT]$  which leads to  $k_{\text{CH}_4}/k_{\text{CHF}_3} = 14.4 \exp[(4530 \pm 80)/RT] = 14.4 \exp[(2280 \pm 40)/T]$ . Using  $k(\text{Cl} + \text{CH}_4) = 6.6 \times 10^{-12} \exp(-1240/T) \text{ cm}^3 \text{ molecule}^{-1} \text{ s}^{-1}$  (Atkinson et al., 2006) gives  $k(\text{Cl} + \text{CHF}_3) = 4.6 \times 10^{-13} \exp(-3520/T) \text{ cm}^3 \text{ molecule}^{-1} \text{ s}^{-1}$ . At 298 K this expression gives  $k(\text{Cl} + \text{CHF}_3) = 3.4 \times 10^{-18} \text{ cm}^3 \text{ molecule}^{-1} \text{ s}^{-1}$ .

**Preferred Values**

| Parameter                                                        | Value                 | T/K |
|------------------------------------------------------------------|-----------------------|-----|
| <i>k</i> /cm <sup>3</sup> molecule <sup>-1</sup> s <sup>-1</sup> | $3.4 \times 10^{-18}$ | 298 |
| <i>Reliability</i>                                               |                       |     |
| $\Delta \log k$                                                  | 0.5                   | 298 |

1323  
1324  
1325  
1326  
1327  
1328  
1329  
1330  
1331  
1332  
1333  
1334  
1335  
1336

*Comments on Preferred Values*

The rate coefficient reported by Jourdain et al. at 298 K is two orders of magnitude greater than that obtained from the data from Coomber and Whittle. The reaction endothermicity of 17.9 kJ mol<sup>-1</sup> provides a lower limit for the activation energy ( $E_a/R = 2150$ ) which combined with an estimate of  $1 \times 10^{-12}$  for the A factor gives an upper limit of  $k(\text{Cl} + \text{CHF}_3) < 7 \times 10^{-16} \text{ cm}^3 \text{ molecule}^{-1} \text{ s}^{-1}$  at 298 K. In the absolute rate study by Jourdain et al. a contribution from reaction with reactive impurities is difficult to exclude. The study by Coomber and Whittle gives a rate coefficient ratio of  $k(\text{Cl} + \text{CH}_4)/k(\text{Cl} + \text{C}_2\text{HF}_5) = 144$  which is approximately a factor of two lower than the ratio of the preferred rate coefficients  $k(\text{Cl} + \text{CH}_4)/k(\text{Cl} + \text{C}_2\text{HF}_5) = 385$  (Atkinson et al., 2006; 2008). The preferred value of  $k(\text{Cl} + \text{CHF}_3) = 3.4 \times 10^{-18} \text{ cm}^3 \text{ molecule}^{-1} \text{ s}^{-1}$  at 298 K is based on the results from Coomber and Whittle and has substantial uncertainty.

## References

1337

1338

1339 Atkinson, R., Baulch, D. L., Cox, R. A., Crowley, J. N., Hampson, R. F., Hynes, R. G., Jenkin, M. E.,  
1340 Rossi, M. J., and Troe, J.: Atmos. Chem. Phys., 6, 3625, 2006; IUPAC Task Group on  
1341 Atmospheric Chemical Kinetic Data Evaluation, <https://iupac.aeris-data.fr/>

1342 Atkinson, R., Baulch, D. L., Cox, R. A., Crowley, J. N., Hampson, R. F., Hynes, R. G., Jenkin, M. E.,  
1343 Rossi, M. J., Troe, J., and Wallington, T. J.: Atmos. Chem. Phys., 8, 4141, 2008; IUPAC Task  
1344 Group on Atmospheric Chemical Kinetic Data Evaluation, <https://iupac.aeris-data.fr/>

1345 Coomber, J.B. and Whittle, E.: Trans. Faraday Soc., 62, 2183, 1966.

1346 Jourdain, J. L., Poulet, G., Barassin, J., Le Bras, G. and Combourieu J.: Pollut. Atmos., 75, 256, 1977.

1347

1350 **Cl + CH<sub>3</sub>Br → HCl + CH<sub>2</sub>Br**

1351 **Rate coefficient data**

| <i>k</i> /cm <sup>3</sup> molecule <sup>-1</sup> s <sup>-1</sup>                  | Temp./K          | Reference                    | Technique/ Comments |
|-----------------------------------------------------------------------------------|------------------|------------------------------|---------------------|
| <i>Absolute Rate Coefficients</i>                                                 |                  |                              |                     |
| 1.55 × 10 <sup>-11</sup> exp[-(1070 ± 50)/T]<br>(4.38 ± 0.55) × 10 <sup>-13</sup> | 222-393.5<br>298 | Gierczak et al. (1994)       | PLP-RF (a)          |
| 1.66 × 10 <sup>-11</sup> exp[-(1072 ± 46)/T]<br>(4.83 ± 0.12) × 10 <sup>-13</sup> | 273-363<br>303   | Kambanis et al. (1997)       | VLPR-MS (b)         |
| 1.02 × 10 <sup>-15</sup> T <sup>1.42</sup> exp(-605/T)<br>4.5 × 10 <sup>-13</sup> | 213-697<br>298   | Piety et al. (1998)          | PLP-RF (c)          |
| 1.55 × 10 <sup>-11</sup> exp[-(1070 ± 50)/T]<br>(4.6 ± 0.2) × 10 <sup>-13</sup>   | 298-350<br>298   | Larin et al. (2018)          | DF-RF (d)           |
| <i>Relative Rate Coefficients</i>                                                 |                  |                              |                     |
| 1.26 × 10 <sup>-11</sup> exp(-1565/T)<br>6.6 × 10 <sup>-14</sup>                  | 273-368<br>298   | Tschuikow-Roux et al. (1988) | RR (e)              |
| 1.07 × 10 <sup>-11</sup> exp(-935/T)<br>4.5 × 10 <sup>-13</sup>                   | 231-295<br>295   | Orlando et al. (1996)        | RR (f)              |
| 9.04 × 10 <sup>-12</sup> exp(-886/T)<br>4.5 × 10 <sup>-13</sup>                   | 298-527<br>298   | Gola et al. (2010)           | RR (g)              |

1355 **Comments**

- 1356
- 1357
- 1358 (a) The reaction rate coefficients were measured by generating Cl atoms via 308 nm laser  
 1359 photolysis of Cl<sub>2</sub> and measuring their temporal profiles via resonance fluorescence  
 1360 detection. Experiments were performed in approximately 50 Torr (66.7 mbar) of helium.
- 1361 (b) The reaction rate coefficients were measured using a very low pressure reactor, employing a  
 1362 microwave discharge in Cl<sub>2</sub> for the generation of Cl atoms with mass spectrometric  
 1363 detection of reactants and products. Experiments were performed in approximately 1 mTorr  
 1364 (1.33 mbar) of helium.
- 1365 (c) The reaction rate coefficients were measured by generating Cl atoms via 266 nm laser  
 1366 photolysis of Cl<sub>2</sub>CO (or Cl<sub>2</sub> at 355 nm in a few experiments) and measuring their temporal  
 1367 profiles via resonance fluorescence detection. Experiments were performed at 161 – 697 K  
 1368 in 20 - 250 Torr (27 - 270 mbar) of nitrogen. At temperatures in the range 161 – 177 K  
 1369 reversible addition of Cl atoms to give the CH<sub>3</sub>BrCl adduct was observed. For T ≥ 213 K  
 1370 where hydrogen abstraction is the dominant reaction pathway the Arrhenius expression  
 1371 given in the table above was obtained.
- 1372 (d) Cl atoms generated by microwave discharge of Cl<sub>2</sub> in helium diluent. Cl atoms were  
 1373 detected using resonance fluorescence at 118.9 nm.
- 1374 (e) Cl atoms were generated by the photolysis of Cl<sub>2</sub> at 424 nm, and the concentrations of the  
 1375 reactions products CH<sub>2</sub>ClBr and CH<sub>3</sub>Cl measured by GC. The measured rate coefficient  
 1376 ratio of  $k(\text{Cl} + \text{CH}_3\text{Br})/k(\text{Cl} + \text{CH}_4) = (1.91 \pm 0.09) \exp[-(325 \pm 10)/T]$  is placed on an  
 1377 absolute basis using  $k(\text{Cl} + \text{CH}_4) = 6.6 \times 10^{-12} \exp(-1240/T) \text{ cm}^3 \text{ molecule}^{-1} \text{ s}^{-1}$  (Atkinson et  
 1378 al., 2006).
- 1379 (f) Cl atoms were generated by the photolysis of Cl<sub>2</sub>. The decays of the reactant and reference  
 1380 organic were measured by FTIR spectroscopy. Experiments were performed in

1381 approximately 700 Torr (933 mbar) of N<sub>2</sub>. The measured rate coefficient was placed on an  
 1382 absolute basis using  $k(\text{Cl} + \text{CH}_4) = 6.6 \times 10^{-12} \exp(-1240/T) \text{ cm}^3 \text{ molecule}^{-1} \text{ s}^{-1}$  (Atkinson et  
 1383 al., 2006).  
 1384 (g) The decays of the reactant and reference (CH<sub>4</sub>) organic were measured by GC. The  
 1385 measured rate coefficient ratios were placed on an absolute basis using  $k(\text{Cl} + \text{CH}_4) = 6.6 \times$   
 1386  $10^{-12} \exp(-1240/T) \text{ cm}^3 \text{ molecule}^{-1} \text{ s}^{-1}$  (Atkinson et al., 2006).  
 1387

### 1388 Preferred Values

| 1389 Parameter                                         | Value                                | T/K     |
|--------------------------------------------------------|--------------------------------------|---------|
| $k / \text{cm}^3 \text{ molecule}^{-1} \text{ s}^{-1}$ | $4.5 \times 10^{-13}$                | 298     |
| $k / \text{cm}^3 \text{ molecule}^{-1} \text{ s}^{-1}$ | $1.38 \times 10^{-11} \exp(-1020/T)$ | 210-300 |
| 1390 <i>Reliability</i>                                |                                      |         |
| $\Delta \log k$                                        | 0.05                                 | 298     |
| $\Delta(E/R)$                                          | $\pm 100$                            | 210-300 |

### 1392 Comments on Preferred Values

1393 The preferred value at 298 K is an average of the results reported by Gierczak et al. (1994),  
 1394 Kambanis et al. (1997), Piety et al. (1998), Orlando et al. (1996), and Gola et al. (2010). The  
 1395 expression for the temperature dependence listed in the Table of preferred values is derived from  
 1396 the fit to the data of these studies below 300 K. The values reported by Tschuikow-Roux et al.  
 1397 are not used because they seem to be systematically higher than the results of the other  
 1398 measurements. The results reported by Larin et al. (2018) are consistent with the preferred  
 1399 value. At temperatures of 161 – 177 K the reaction leads to the reversible formation of the  
 1400 adduct CH<sub>3</sub>BrCl. For temperatures above 213 K there is no experimental evidence for  
 1401 formation of the adduct and reaction proceeds via hydrogen abstraction (Piety et al., 1998;  
 1402 Enami et al., 2005). For temperatures above 298 K there is some disagreement between the  
 1403 results from Piety et al. (1998) and Gola et al. (2010). A fit of the modified Arrhenius expression  
 1404 to the entire data set from Gierczak et al., Kambanis et al., Piety et al., Orlando et al., and Gola  
 1405 et al. gives  $k = 1.78 \times 10^{-17} T^2 \exp(-396/T) \text{ cm}^3 \text{ molecule}^{-1} \text{ s}^{-1}$  and is preferred for 550 K > T >  
 1406 298 K.  
 1407  
 1408  
 1409

### 1410 References

- 1411  
 1412 Atkinson, R., Baulch, D. L., Cox, R. A., Crowley, J. N., Hampson, R. F., Hynes, R. G., Jenkin, M.  
 1413 E., Rossi, M. J., and Troe, J.: Atmos. Chem. Phys., 6, 3625, 2006; IUPAC Task Group on  
 1414 Atmospheric Chemical Kinetic Data Evaluation, <https://iupac.aeris-data.fr/>  
 1415 Enami, S., Hashimoto, S., Kawasaki, M., Nakano, Y., Ishiwata, T., and Wallington, T. J.: J. Phys.  
 1416 Chem. A, 109, 1587, 2005.  
 1417 Gierczak, T., Goldfarb, L., Sueper, D. and Ravishankara, A. R.: Int. J. Chem. Kinet., 26, 719, 1994.  
 1418 Gola, A.A, Sarzyński, D., Dryś, A. and Jodkowski, J.T.: Chem. Phys. Lett., 486, 7, 2010.  
 1419 Kambanis, K. G., Lazarou, Y. G., and Papagiannakopoulos, P.: J. Phys. Chem. A, 101, 8496, 1997.  
 1420 Larin, I. K., Spasskii, A. I., Trofimova, E. M., and Proncheva, N. G.: Kinet. Catal., 59, 11, 2018.  
 1421 Orlando, J. J., Tyndall, G. S., Wallington, T. J., and Dill, M.: Int. J. Chem. Kinet., 28, 433, 1996.  
 1422 Piety, C. A., Soller, R., Nicovich, J. M., McKee, M. L., and Wine, P. H.: Chem. Phys., 231, 155,  
 1423 1998.  
 1424 Tschuikow-Roux, E., Faraji, F., Paddison, S., Niedzielski, J., and Miyokawa, K.: J. Phys. Chem., 92,  
 1425 1488, 1988.  
 1426

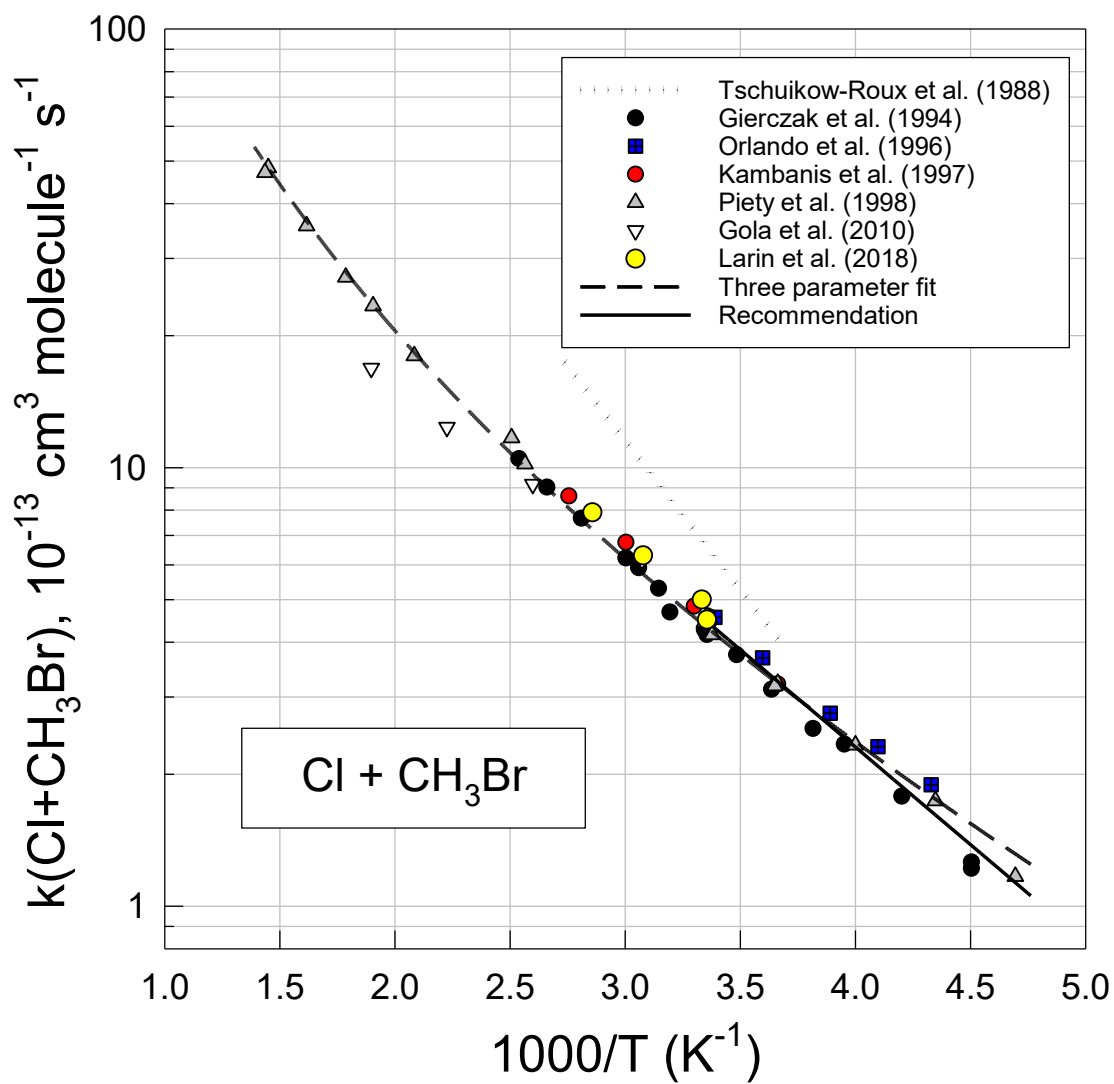

1432 **HO + CF<sub>2</sub>=CF<sub>2</sub> → products**

1433 **Rate coefficient data**

| <i>k</i> /cm <sup>3</sup> molecule <sup>-1</sup> s <sup>-1</sup> | <i>T</i> /K | Reference             | Technique/ Comments |
|------------------------------------------------------------------|-------------|-----------------------|---------------------|
| <i>Absolute Rate Coefficients</i>                                |             |                       |                     |
| (1.02 ± 0.05) × 10 <sup>-11</sup>                                | 298         | Orkin et al., 1997    | FP-RF (a)           |
| 3.39 × 10 <sup>-12</sup> exp[(323±11)/ <i>T</i> ]                | 250-370     | Orkin et al., 2002    | FP-RF (a)           |
| (1.00 ± 0.015) × 10 <sup>-11</sup>                               | 298         |                       |                     |
| (8.0 ± 0.3) × 10 <sup>-12</sup>                                  | 370         | Orkin et al., 2011    | FP-RF (a)           |
| (7.09 ± 0.02) × 10 <sup>-12</sup>                                | 480         |                       |                     |
| <i>Relative Rate Coefficients</i>                                |             |                       |                     |
| (1.07 ± 0.34) × 10 <sup>-11</sup>                                | 298         | Acerboni et al., 1999 | RR (b)              |
| (1.07 ± 0.15) × 10 <sup>-11</sup>                                | 298         |                       |                     |

1437 **Comments**

- 1438 (a) HO radicals were generated by the photolysis of H<sub>2</sub>O by a xenon flash lamp in 100 Torr (133  
 1439 mbar) of argon diluent. HO radicals were monitored using resonance fluorescence.  
 1440 (b) Photolysis of CH<sub>3</sub>ONO in C<sub>2</sub>F<sub>4</sub>-C<sub>3</sub>H<sub>6</sub>-NO and C<sub>2</sub>F<sub>4</sub>-cyclohexane-NO mixtures in 740 Torr (986  
 1441 mbar) of air diluent was used to generate HO radicals and measure  $k(\text{C}_2\text{F}_4)/k(\text{C}_3\text{H}_6) =$   
 1442  $0.375 \pm 0.118$  and  $k(\text{C}_2\text{F}_4)/k(\text{cyclohexane}) = 1.566 \pm 0.226$ . Using  $k(\text{HO} + \text{C}_3\text{H}_6) = 2.85 \times 10^{-11}$   
 1443 (Atkinson et al., 2006) and  $k(\text{HO} + \text{cyclohexane}) = 6.85 \times 10^{-12} \text{ cm}^3 \text{ molecule}^{-1} \text{ s}^{-1}$  (Calvert et al.,  
 1444 2015) gives  $k(\text{HO} + \text{C}_2\text{F}_4) = (1.07 \pm 0.34) \times 10^{-11} \text{ cm}^3 \text{ molecule}^{-1} \text{ s}^{-1}$  and  $(1.07 \pm 0.15) \times 10^{-11} \text{ cm}^3$   
 1445  $\text{molecule}^{-1} \text{ s}^{-1}$ .

1446 **Preferred Values**

| Parameter                                                        | Value                                        | <i>T</i> /K |
|------------------------------------------------------------------|----------------------------------------------|-------------|
| <i>k</i> /cm <sup>3</sup> molecule <sup>-1</sup> s <sup>-1</sup> | 1.04 × 10 <sup>-11</sup>                     | 298         |
| <i>k</i> /cm <sup>3</sup> molecule <sup>-1</sup> s <sup>-1</sup> | 3.84 × 10 <sup>-12</sup> exp(297/ <i>T</i> ) | 250-500     |
| <i>Reliability</i>                                               |                                              |             |
| Δ log <i>k</i>                                                   | ± 0.06                                       | 298         |
| Δ E/R                                                            | ± 100                                        | 250-500     |

1452 **Comments on Preferred Values**

1453 The preferred value at 298 K is an average of the absolute rate determinations by Orkin et al.  
 1454 (1997) and (2002) and the relative rate determination by Acerboni et al. (1999). The temperature  
 1455 dependence is derived from a fit to the data from Orkin et al. (2002) and (2011) with the A factor  
 1456 adjusted to give the preferred rate coefficient at 298 K.

1457 The reaction proceeds via addition to the >C=C< double bond. Based upon the behavior of the  
 1458 reaction of HO radicals with similar halogenated alkenes such as CH<sub>2</sub>=CF<sub>2</sub> (Howard, 1976) it is  
 1459 expected that the kinetics of the reaction will be at the high pressure limit for total pressures above  
 1460

1463 approximately 5 Torr (7 mbar). Consistent with this expectation there is no discernable difference  
 1464 between the rate coefficient measured in 100 Torr of argon diluent by Orkin et al. (1997, 2002) and  
 1465 that measured in 740 Torr of air by Acerboni et al. (1999). The HO radical initiated oxidation of  
 1466  $\text{CF}_2=\text{CF}_2$  will give  $\text{COF}_2$  as the major product.

1467

1468

1469

1470

1471

1472

1473

1474

1475

1476

1477

1478

1479

1480

1481

1482

1483

1484

1485

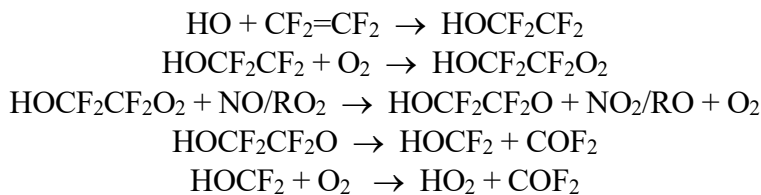

### References

- Acerboni, G.; Jensen, N. R.; Rindone, B.; and Hjorth, J.: Chem. Phys. Lett., 309, 364, 1999.  
 Atkinson, R., Baulch, D. L., Cox, R. A., Crowley, J. N., Hampson, R. F., Hynes, R. G., Jenkin, M. E., Rossi, M. J., and Troe, J.: Atmos. Chem. Phys., 6, 3625, 2006; IUPAC Task Group on Atmospheric Chemical Kinetic Data Evaluation, <https://iupac.aeris-data.fr/>  
 Calvert, J. G.; Orlando, J. J.; Stockwell, W. R.; and Wallington, T. J.: The mechanisms of reactions influencing atmospheric ozone, Oxford University Press, 2015.  
 Orkin, V. L.; Huie, R. E.; and Kurylo, M. J.: J. Phys. Chem. A, 101, 9118, 1997.  
 Orkin, V. L.; Louis, F.; Huie, R. E.; and Kurylo, M. J.: J. Phys. Chem. A, 106, 10195, 2002.  
 Orkin, V. L.; Poskrebyshev, G. A.; and Kurylo, M. J., J. Phys. Chem. A, 115, 6568, 2011.

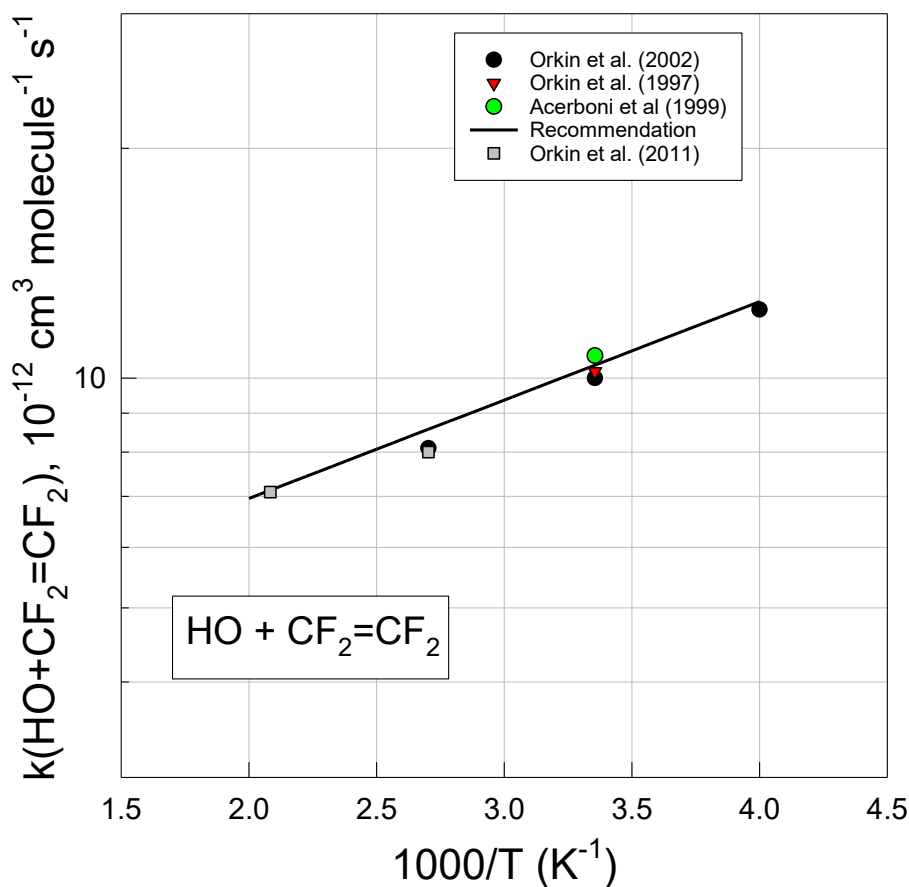

1486

1487

1490 **HO + CF<sub>3</sub>CF=CH<sub>2</sub> (HFO-1234yf) → products**

1491 **Rate coefficient data**

| <i>k</i> /cm <sup>3</sup> molecule <sup>-1</sup> s <sup>-1</sup> | Temp./K | Reference                   | Technique/ Comments |
|------------------------------------------------------------------|---------|-----------------------------|---------------------|
| <i>Absolute Rate Coefficients</i>                                |         |                             |                     |
| 1.41 × 10 <sup>-12</sup> exp[-(64±27)/T]                         | 252-370 | Orkin et al. (1997)         | FP-RF (a)           |
| (1.12 ± 0.02) × 10 <sup>-12</sup>                                | 298     |                             |                     |
| 1.26 × 10 <sup>-12</sup> exp[-(35±10)/T]                         | 207-380 | Papadimitriou et al. (2008) | PLP-LIF (b)         |
| (1.12 ± 0.02) × 10 <sup>-12</sup>                                | 296     |                             |                     |
| 1.145 × 10 <sup>-12</sup> exp[-13/T]                             | 220-298 | Orkin et al. (2010)         | FP-RF (c)           |
| (1.096 ± 0.007) × 10 <sup>-12</sup>                              | 298     |                             |                     |
| 1.54 × 10 <sup>-12</sup> exp[100/T]                              | 250-430 | Tokuhashi et al. (2018)     | LP, FP-LIF (d)      |
| (1.10 ± 0.01) × 10 <sup>-12</sup>                                | 298     |                             |                     |
| <i>Relative Rate Coefficients</i>                                |         |                             |                     |
| (9.04 ± 0.67) × 10 <sup>-13</sup>                                | 296     | Nielsen et al. (2007)       | RR (e)              |
| (9.82 ± 0.55) × 10 <sup>-13</sup>                                | 296     |                             |                     |

1495 **Comments**

- 1496
- 1497
- 1498 (a) HO radicals were generated by the photolysis of H<sub>2</sub>O by a xenon flash lamp in 100 Torr (133
- 1499 mbar) of argon diluent.
- 1500 (b) HO radicals were produced using the pulsed laser photolysis of either H<sub>2</sub>O<sub>2</sub> or HNO<sub>3</sub> at 248
- 1501 nm. Experiments at 296K were conducted in a total pressure of 25-600 Torr (33-800 mbar)
- 1502 using helium, nitrogen, or SF<sub>6</sub> diluent. There was no discernable effect of total pressure or
- 1503 diluent on the kinetics of the reaction.
- 1504 (c) HO radicals were generated by the photolysis of H<sub>2</sub>O by a xenon flash lamp in 30-300 Torr (40-
- 1505 400 mbar) of argon diluent.
- 1506 (d) HO radicals were generated by either flash photolysis or pulsed laser photolysis. In the flash
- 1507 photolysis experiments one chemical system (photolysis of water vapor) was employed while in
- 1508 the laser photolysis experiments three different chemical systems were used to generate HO
- 1509 radicals. There was no discernible difference in results obtained using the different methods.
- 1510 Experiments were performed in 5-200 Torr of argon or helium diluent, there was no discernible
- 1511 effect of pressure or diluent gas. The CF<sub>3</sub>CF=CH<sub>2</sub> sample was purified before use and determined
- 1512 to be 99.99% pure.
- 1513 (e) Photolysis of CH<sub>3</sub>ONO in 700 Torr (933 mbar) of air diluent was used to generate HO
- 1514 radicals. The loss of CF<sub>3</sub>CF=CH<sub>2</sub> was measured relative to those of C<sub>2</sub>H<sub>2</sub> and C<sub>2</sub>H<sub>4</sub> and used
- 1515 to measure the rate coefficient ratios  $k(\text{CF}_3\text{CF}=\text{CH}_2)/k(\text{C}_2\text{H}_2) = 1.21 \pm 0.09$  and
- 1516  $k(\text{CF}_3\text{CF}=\text{CH}_2)/k(\text{C}_2\text{H}_4) = 0.125 \pm 0.007$ . Using  $k(\text{HO} + \text{C}_2\text{H}_2) = 7.47 \times 10^{-13}$  and  $k(\text{HO} +$
- 1517  $\text{C}_2\text{H}_4) = 7.85 \times 10^{-12}$  (Atkinson et al., 2006) gives  $k(\text{HO} + \text{CF}_3\text{CF}=\text{CH}_2) = (9.04 \pm 0.67) \times 10^{-13}$
- 1518 cm<sup>3</sup> molecule<sup>-1</sup> s<sup>-1</sup> and  $(9.82 \pm 0.55) \times 10^{-13}$  cm<sup>3</sup> molecule<sup>-1</sup> s<sup>-1</sup>.
- 1519
- 1520
- 1521

1522 **Preferred Values**

1523

| Parameter                                              | Value                              | T/K     |
|--------------------------------------------------------|------------------------------------|---------|
| $k / \text{cm}^3 \text{ molecule}^{-1} \text{ s}^{-1}$ | $1.12 \times 10^{-12}$             | 298     |
| $k / \text{cm}^3 \text{ molecule}^{-1} \text{ s}^{-1}$ | $1.16 \times 10^{-12} \exp(-10/T)$ | 200-300 |
| <i>Reliability</i>                                     |                                    |         |
| $\Delta \log k$                                        | $\pm 0.06$                         | 298     |
| $\Delta E/R$                                           | $\pm 100$                          | 200-300 |

1525

1526

1527 *Comments on Preferred Values*

1528

1529

1530

1531

1532

1533

1534

1535

1536

1537

1538

1539

1540

1541

1542

1543

1544

1545

1546

1547

1548

1549

1550

1551

1552

1553

1554

1555

1556

1557

1558

1559

1560

1561

1562

The absolute rate measurements by Orkin et al. (1997), Papadimitriou et al. (2008), Orkin et al. (2010), and Tokuhashi et al. (2018) are in excellent agreement (within 5% at all temperatures studied) while the relative rate measurements by Nielsen et al. (2008) at 296 K lie approximately 15% below those from the absolute studies. Orkin et al. (1997), Papadimitriou et al. (2008), and Tokuhashi et al. (2018) showed that for pressures above 5 Torr there is no effect of total pressure and the reaction is at, or near, the high pressure limit. The preferred value at 298 K is the average from Orkin et al. (1997), Papadimitriou et al. (2008), and Orkin et al. (2010). The precision of the absolute rate measurements for this reaction are excellent and a small, but discernable, curvature is evident in the Arrhenius plot. A fit of a modified Arrhenius expression to the entire data set from Orkin et al. (1997), Papadimitriou et al. (2008), and Orkin et al. (2010) gives  $k = 0.545 \times (T/298)^{0.882} \exp(212/T) \text{ cm}^3 \text{ molecule}^{-1} \text{ s}^{-1}$ . A fit of the Arrhenius expression to the data below 300 K with the A-factor adjusted to reproduce the preferred value of  $k$  at 298 K gives  $k = 1.16 \times 10^{-12} \exp(-10/T) \text{ cm}^3 \text{ molecule}^{-1} \text{ s}^{-1}$ . The data from Tokuhashi et al. (2018) are in good agreement with the preferred value. For simplicity and consistency within the IUPAC database we prefer the simple Arrhenius expression. The HO radical initiated oxidation of  $\text{CF}_3\text{CF}=\text{CH}_2$  gives  $\text{CF}_3\text{C}(\text{O})\text{F}$  and  $\text{HCHO}$  as products (Hurley et al., 2008). The atmospheric fate of  $\text{CF}_3\text{C}(\text{O})\text{F}$  is hydrolysis to give  $\text{CF}_3\text{C}(\text{O})\text{OH}$  (trifluoroacetic acid).

### References

- Atkinson, R., Baulch, D. L., Cox, R. A., Crowley, J. N., Hampson, R. F., Hynes, R. G., Jenkin, M. E., Rossi, M. J., and Troe, J.: *Atmos. Chem. Phys.*, 6, 3625, 2006; IUPAC Task Group on Atmospheric Chemical Kinetic Data Evaluation, <https://iupac.aeris-data.fr/>
- Hurley, M. D., Wallington, T. J., Javadi, M.S., and Nielsen, O. J.: *Chem. Phys. Lett.* 450, 263, 2008.
- Nielsen, O. J.; Javadi, M. S.; Sulbaek Andersen, M. P.; Hurley, M. D.; Wallington, T. J.; and Singh, R.: *Chem. Phys. Lett.* 439, 18, 2007.
- Orkin, V. L., Huie, R. E., and Kurylo, M. J.: *J. Phys. Chem. A*, 101, 9118, 1997.
- Orkin, V. L.; Martynova, L. E.; and Ilichev, A. N.: *J. Phys. Chem. A*, 114, 5967, 2010.
- Papadimitriou, V. C.; Talukdar, R. K.; Portmann, R. W.; Ravishankara, A. R.; and Burkholder, J. B.: *Phys. Chem. Chem. Phys.*, 10, 808, 2008.
- Tokuhashi, K., Takizawa, K., and Kondo, S.: *Environ. Sci. Pollut. Res.*, 25, 15204, 2018.

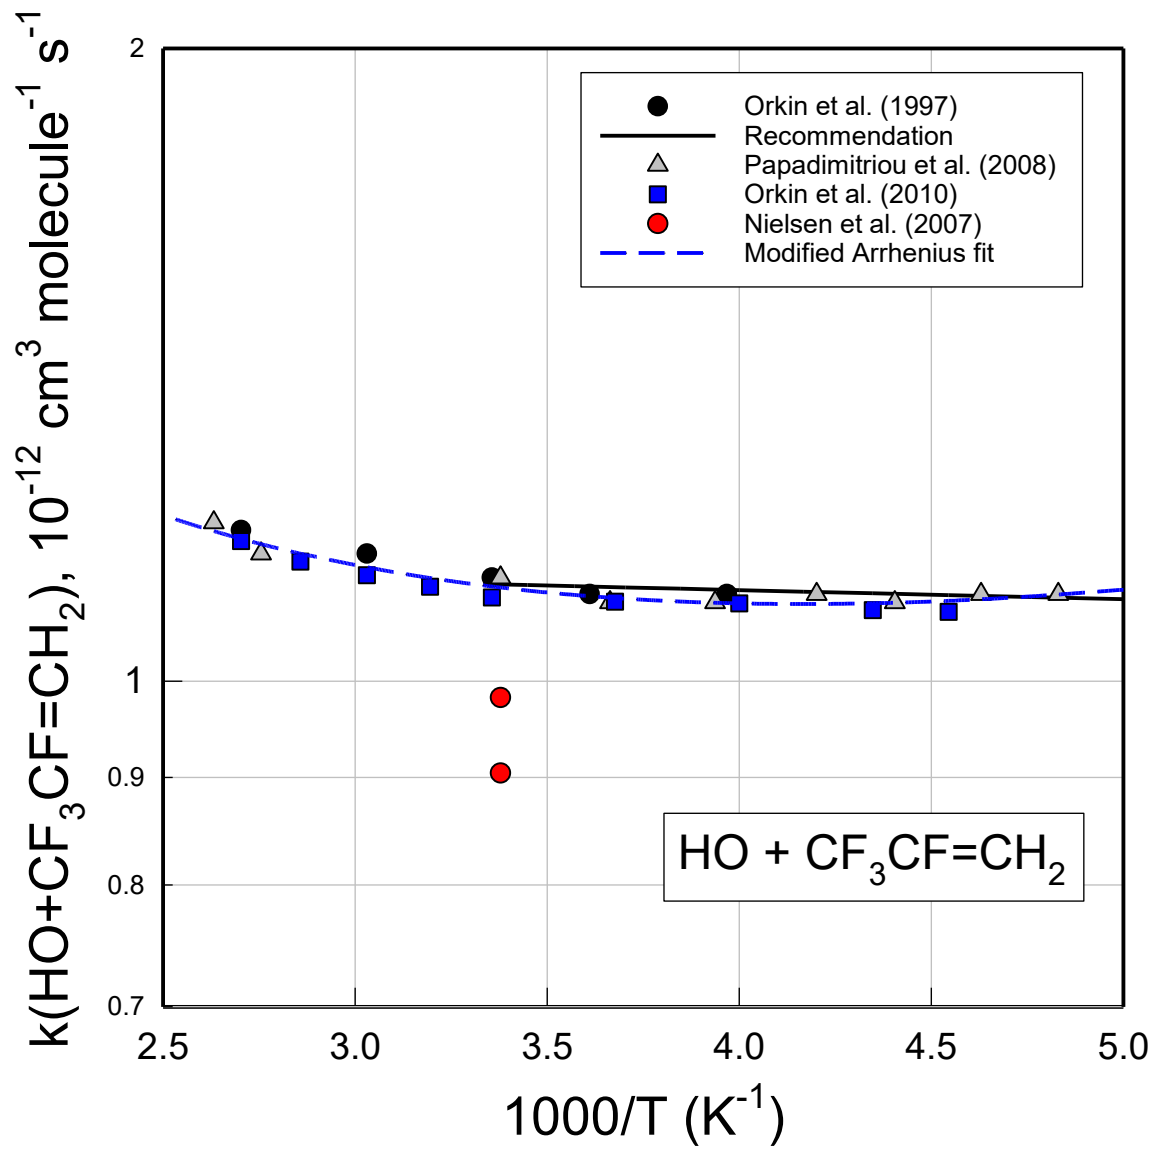

1563  
1564

1567 **HO + E-CF<sub>3</sub>CH=CHF (HFO-1234ze(E)) → products**

1569 **Rate coefficient data**

| $k/\text{cm}^3 \text{ molecule}^{-1} \text{ s}^{-1}$ | Temp./K | Reference                 | Technique/ Comments |
|------------------------------------------------------|---------|---------------------------|---------------------|
| <i>Absolute Rate Coefficients</i>                    |         |                           |                     |
| See comment (a)                                      | 220-370 | Orkin et al. (2010)       | FP-RF (a)           |
| $(7.11 \pm 0.05) \times 10^{-13}$                    | 298     |                           |                     |
| $7.6 \times 10^{-13} (T/298)^{2.44} \exp(666/T)$     | 263-358 | Antiñolo et al. (2017)    | PLP-LIF (b)         |
| $(7.06 \pm 0.27) \times 10^{-13}$                    | 298     |                           |                     |
| $4.8 \times 10^{-13} (T/298)^{0.727} \exp(110/T)$    | 220-430 | Tokuhashi et al. (2021)   | FP, LP-LIF (c)      |
| $(7.03 \pm 0.03) \times 10^{-13}$                    | 298     |                           |                     |
| <i>Relative Rate Coefficients</i>                    |         |                           |                     |
| $(8.00 \pm 0.82) \times 10^{-13}$                    | 296     | Søndergaard et al. (2007) | RR (d)              |
| $(8.72 \pm 0.47) \times 10^{-13}$                    | 296     |                           |                     |
| $1.05 \times 10^{-12} \exp(-118/T)$                  | 253-328 | Zhang et al. (2015)       | RR (e)              |
| $(7.42 \pm 0.28) \times 10^{-13}$                    | 298     |                           |                     |
| $(7.14 \pm 0.34) \times 10^{-13}$                    | 298     |                           |                     |

1572 **Comments**

- 1573
- 1574
- 1575 (a) HO radicals were generated by the photolysis of H<sub>2</sub>O by a xenon flash lamp in 30-200 Torr (40-  
 1576 267 mbar) of argon diluent. HO radicals were monitored using resonance fluorescence. There was  
 1577 no discernable (<5%) effect of total pressure over the range studied on the rate of reaction. A small  
 1578 but distinct curvature was evident in the Arrhenius plot and a modified Arrhenius expression,  $k =$   
 1579  $1.115 \times 10^{-13} (T/298)^{2.03} \exp(552/T) \text{ cm}^3 \text{ molecule}^{-1} \text{ s}^{-1}$  was used to best represent the data.
- 1580 (b) HO radicals were generated by the pulsed laser photolysis of H<sub>2</sub>O<sub>2</sub> or HNO<sub>3</sub> and monitored using  
 1581 laser induced fluorescence in 45-300 Torr of helium diluent. There was no discernable effect of total  
 1582 pressure over the range studied.
- 1583 (c) HO radicals were generated by either flash photolysis or laser photolysis and were monitored using  
 1584 laser induced fluorescence. In the flash photolysis experiments photolysis of water vapor was  
 1585 employed while in the laser photolysis experiments photolysis of N<sub>2</sub>O to produce O(<sup>1</sup>D) atoms in  
 1586 the presence of either water vapor or CH<sub>4</sub> were used to generate HO radicals. There was no  
 1587 discernible difference in results obtained using the different methods. Experiments were performed  
 1588 in 5-200 Torr of argon or helium diluent, there was no discernible effect of pressure or diluent gas.  
 1589 The CF<sub>3</sub>CH=CHF sample was purified before use and the purity of the purified sample was  
 1590 determined to be 99.99%.
- 1591 (d) Photolysis of CH<sub>3</sub>ONO in 700 Torr (933 mbar) of air diluent was used to generate HO radicals. The  
 1592 loss of E-CF<sub>3</sub>CH=CHF was measured relative to C<sub>2</sub>H<sub>2</sub> and C<sub>2</sub>H<sub>4</sub> and used to measure the rate  
 1593 coefficient ratios  $k(\text{CF}_3\text{CH}=\text{CHF})/k(\text{C}_2\text{H}_2) = 1.07 \pm 0.11$  and  $k(\text{E-CF}_3\text{CH}=\text{CHF})/k(\text{C}_2\text{H}_2) =$   
 1594  $0.111 \pm 0.006$ . Using  $k(\text{HO} + \text{C}_2\text{H}_2) = 7.47 \times 10^{-13} \text{ cm}^3 \text{ molecule}^{-1} \text{ s}^{-1}$  and  $k(\text{HO} + \text{C}_2\text{H}_4) = 7.85 \times 10^{-$   
 1595  $12$  (Atkinson et al., 2006) gives  $k(\text{HO} + \text{E-CF}_3\text{CH}=\text{CHF}) = (8.00 \pm 0.82) \times 10^{-13}$  and  $(8.72 \pm 0.47) \times 10^{-$   
 1596  $13 \text{ cm}^3 \text{ molecule}^{-1} \text{ s}^{-1}$ .
- 1597 (e) Photolysis of O<sub>3</sub> in the presence of water vapor in 200 Torr of helium diluent was used to generate  
 1598 HO radicals. The loss of E-CF<sub>3</sub>CH=CHF was measured relative to n-C<sub>4</sub>H<sub>10</sub> and n-C<sub>5</sub>H<sub>12</sub> and used to  
 1599 measure rate coefficient ratios  $k(\text{E-CF}_3\text{CH}=\text{CHF})/k(n\text{-C}_4\text{H}_{10})$  and  $k(\text{E-CF}_3\text{CH}=\text{CHF})/k(n\text{-C}_5\text{H}_{12})$   
 1600 over the temperature range 253-328 K. Rate coefficient ratios at 298 K were  $k(\text{E-CF}_3\text{CH}=\text{CHF})/k(n\text{-}$   
 1601  $\text{C}_4\text{H}_{10}) = 0.291 \pm 0.011$  and  $k(\text{E-CF}_3\text{CH}=\text{CHF})/k(n\text{-C}_5\text{H}_{12}) = 0.187 \pm 0.009$ . Using  $k(\text{HO} + n\text{-C}_4\text{H}_{10}) =$

1602  $9.80 \times 10^{-12} \exp(-425/T)$  (Atkinson et al., 2006) and  $k(\text{HO} + n\text{-C}_5\text{H}_{12}) = 1.81 \times 10^{-11} \exp(-452/T) \text{ cm}^3$   
 1603  $\text{molecule}^{-1} \text{ s}^{-1}$  (Calvert et al., 2008) gives  $k(\text{HO} + E\text{-CF}_3\text{CH=CHF}) = (7.42 \pm 0.28) \times 10^{-13}$  and  $(7.14$   
 1604  $\pm 0.34) \times 10^{-13} \text{ cm}^3 \text{ molecule}^{-1} \text{ s}^{-1}$ .

### 1606 Preferred Values

| 1607 | Parameter                                            | Value                            | T/K     |
|------|------------------------------------------------------|----------------------------------|---------|
|      | $k/\text{cm}^3 \text{ molecule}^{-1} \text{ s}^{-1}$ | $7.07 \times 10^{-13}$           | 298     |
|      | $k/\text{cm}^3 \text{ molecule}^{-1} \text{ s}^{-1}$ | $6.91 \times 10^{-13} \exp(7/T)$ | 210-300 |
| 1608 | <i>Reliability</i>                                   |                                  |         |
|      | $\Delta \log k$                                      | $\pm 0.06$                       | 298     |
|      | $\Delta E/R$                                         | $\pm 100$                        | 210-300 |

### 1611 Comments on Preferred Values

1612 There is good agreement between the rate coefficients measured in the absolute rate studies by  
 1613 Orkin et al. (2010), Antiñolo et al. (2017), and Tokuhashi et al. (2021) and the relative rate study  
 1614 by Zhang et al. (2015). The results of the relative rate study by Søndergaard et al. (2007) lie  
 1615 approximately 15% higher. There was no discernible effect of total pressure over the range 5-200  
 1616 Torr in the studies by Orkin et al. (2010), Antiñolo et al. (2017), and Tokuhashi et al. (2021)  
 1617 indicating that the reaction is at, or near, the high-pressure limit for pressures above 5 Torr. The  
 1618 measurements by Orkin et al. (2010) and Antiñolo et al. (2017) indicate a slight curvature in the  
 1619 Arrhenius plot which is however not apparent in the results from Zhang et al. (2015) and  
 1620 Tokuhashi et al. (2021). A fit of a modified Arrhenius expression to the combined data set from  
 1621 Orkin et al. (2010) and Antiñolo et al. (2017) gives  $k = 1.30 \times 10^{-18} T^2 \exp(551/T) \text{ cm}^3 \text{ molecule}^{-1}$   
 1622  $\text{ s}^{-1}$ . Taking an average of the rate coefficients reported by Orkin et al. (2010), Antiñolo et al.  
 1623 (2017), and Tokuhashi et al. (2021) gives our preferred value at 298 K. A fit of the Arrhenius  
 1624 expression to the data from all studies below 300 K, except from Søndergaard et al. (2007), and  
 1625 adjusting the A factor to match the preferred value at 298 K gives  $k = 6.91 \times 10^{-13} \exp(7/T) \text{ cm}^3$   
 1626  $\text{ molecule}^{-1} \text{ s}^{-1}$ . For simplicity and consistency within the IUPAC database we prefer the simple  
 1627 Arrhenius expression. The HO radical initiated oxidation of  $\text{CF}_3\text{CH=CHF}$  in air gives  $\text{CF}_3\text{C(O)H}$   
 1628 and  $\text{HC(O)F}$  as products (Javadi et al., 2008).

### 1631 References

- 1632  
 1633 Antiñolo, M., Bravo, I., Jiménez, E., Ballesteros, B., Albaladejo, J.: J. Phys. Chem. A, 121, 8322,  
 1634 2017.  
 1635 Atkinson, R., Baulch, D. L., Cox, R. A., Crowley, J. N., Hampson, R. F., Hynes, R. G., Jenkin, M.  
 1636 E., Rossi, M. J., and Troe, J.: Atmos. Chem. Phys., 6, 3625, 2006; IUPAC Task Group on  
 1637 Atmospheric Chemical Kinetic Data Evaluation, <https://iupac.aeris-data.fr/>  
 1638 Calvert, J. G., Derwent, R. G., Orlando, J. J., Tyndall, G. S., and Wallington T. J.: Mechanisms of  
 1639 Atmospheric Oxidation of the Alkanes, Oxford University Press, New York, NY, 2008.  
 1640 Javadi, M. S., Søndergaard, R., Nielsen, O. J., Hurley, M. D., and Wallington, T. J.: Atmospheric  
 1641 Chemistry and Physics, 8, 3141, 2008.  
 1642 Orkin, V. L., Martynova, L. E., and Ilichev, A. N.: J. Phys. Chem. A, 114, 5967, 2010.  
 1643 Søndergaard, R., Nielsen, O. J., Hurley, M. D., Wallington, T. J., and Singh, R.: Chem. Phys. Lett.,  
 1644 443, 199, 2007.  
 1645 Tokuhashi, K., Takizawa, K., Kondo, S.: Atmos Environ., 255, 118428, 2021.  
 1646 Zhang, N., Chen, L., Mizukado, J., Quan, H., Suda, H.: Chem. Phys. Lett., 621, 78, 2015.

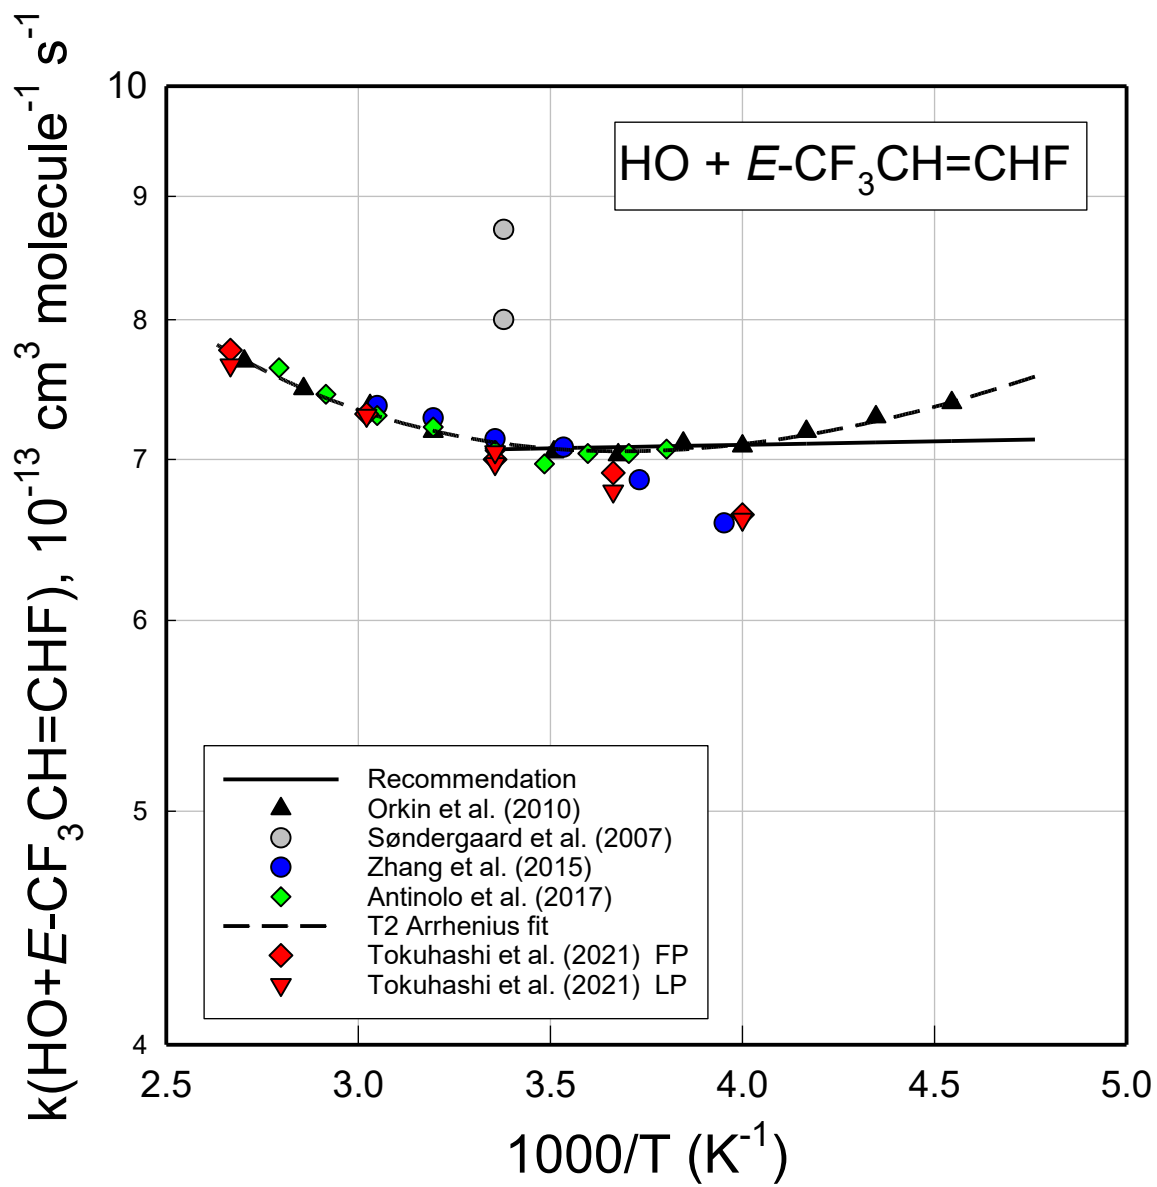

1653 **HO + Z-CF<sub>3</sub>CH=CHF (HFO-1234ze(Z)) → products**

1654 **Rate coefficient data**

| $k/\text{cm}^3 \text{ molecule}^{-1} \text{ s}^{-1}$ | Temp./K | Reference              | Technique/ Comments |
|------------------------------------------------------|---------|------------------------|---------------------|
| <i>Absolute Rate Coefficients</i>                    |         |                        |                     |
| $1.4 \times 10^{-13} (T/298)^{1.91} \exp(640/T)$     | 263-358 | Antiñolo et al. (2017) | PLP-LIF (a)         |
| $(1.21 \pm 0.03) \times 10^{-12}$                    | 298     |                        |                     |
| <i>Relative Rate Coefficients</i>                    |         |                        |                     |
| $(1.02 \pm 0.06) \times 10^{-12}$                    | 296     | Nilsson et al. 2009    | RR (b)              |
| $(1.15 \pm 0.10) \times 10^{-12}$                    | 296     |                        |                     |
| $9.11 \times 10^{-13} \exp(-114/T)$                  | 253-328 | Zhang et al. (2015)    | RR (c)              |
| $(1.38 \pm 0.02) \times 10^{-12}$                    | 298     |                        |                     |
| $(1.42 \pm 0.03) \times 10^{-12}$                    | 298     |                        |                     |

1658 **Comments**

- 1659
- 1660
- 1661 (a) HO radicals were generated by the pulsed laser photolysis of H<sub>2</sub>O<sub>2</sub> or HNO<sub>3</sub> and monitored using  
 1662 laser induced fluorescence in 45-300 Torr of helium diluent. There was no discernible effect of total  
 1663 pressure on the rate coefficient over the range studied.
- 1664 (b) Photolysis of CH<sub>3</sub>ONO in 700 Torr (933 mbar) of air diluent was used to generate HO radicals. The  
 1665 loss of Z-CF<sub>3</sub>CH=CHF was measured relative to C<sub>2</sub>H<sub>2</sub> and C<sub>2</sub>H<sub>4</sub> and used to measure the rate  
 1666 coefficient ratios  $k(\text{Z-CF}_3\text{CH=CHF})/k(\text{C}_2\text{H}_2) = 1.37 \pm 0.11$  and  $k(\text{Z-CF}_3\text{CH=CHF})/k(\text{C}_2\text{H}_4) =$   
 1667  $0.146 \pm 0.012$ . Using  $k(\text{HO} + \text{C}_2\text{H}_2) = 7.47 \times 10^{-13}$  and  $k(\text{HO} + \text{C}_2\text{H}_4) = 7.85 \times 10^{-12} \text{ cm}^3 \text{ molecule}^{-1}$   
 1668  $\text{s}^{-1}$  (Atkinson et al., 2006) gives  $k(\text{HO} + \text{Z-CF}_3\text{CH=CHF}) = (1.02 \pm 0.06) \times 10^{-12}$  and  $(1.15 \pm 0.10) \times$   
 1669  $10^{-12} \text{ cm}^3 \text{ molecule}^{-1} \text{ s}^{-1}$ .
- 1670 (c) Photolysis of O<sub>3</sub> in the presence of water vapor in 200 Torr of helium diluent was used to generate  
 1671 HO radicals. The loss of E-CF<sub>3</sub>CH=CHF was measured relative to n-C<sub>4</sub>H<sub>10</sub> and n-C<sub>5</sub>H<sub>12</sub> to derive  
 1672 rate coefficient ratios  $k(\text{Z-CF}_3\text{CH=CHF})/k(n\text{-C}_4\text{H}_{10})$  and  $k(\text{Z-CF}_3\text{CH=CHF})/k(n\text{-C}_5\text{H}_{12})$  over the  
 1673 temperature range 253-328 K. Rate coefficient ratios at 298 K were  $k(\text{Z-CF}_3\text{CH=CHF})/k(n\text{-C}_4\text{H}_{10})$   
 1674  $= 0.585 \pm 0.009$  and  $k(\text{Z-CF}_3\text{CH=CHF})/k(n\text{-C}_5\text{H}_{12}) = 0.358 \pm 0.007$ . Using  $k(\text{HO} + n\text{-C}_4\text{H}_{10}) = 9.80 \times$   
 1675  $10^{-12} \exp(-425/T) \text{ cm}^3 \text{ molecule}^{-1} \text{ s}^{-1}$  (Atkinson et al., 2006) and  $k(\text{HO} + n\text{-C}_5\text{H}_{12}) = 1.81 \times 10^{-11}$   
 1676  $\exp(-452/T) \text{ cm}^3 \text{ molecule}^{-1} \text{ s}^{-1}$  (Calvert et al., 2008) gives  $k(\text{HO} + \text{Z-CF}_3\text{CH=CHF}) = (1.38 \pm 0.02)$   
 1677  $\times 10^{-12}$  and  $(1.42 \pm 0.03) \times 10^{-13} \text{ cm}^3 \text{ molecule}^{-1} \text{ s}^{-1}$ .
- 1678

1679  
1680

### Preferred Values

| Parameter                                              | Value                              | T/K     |
|--------------------------------------------------------|------------------------------------|---------|
| $k / \text{cm}^3 \text{ molecule}^{-1} \text{ s}^{-1}$ | $1.21 \times 10^{-12}$             | 298     |
| $k / \text{cm}^3 \text{ molecule}^{-1} \text{ s}^{-1}$ | $8.46 \times 10^{-13} \exp(106/T)$ | 260-300 |
| <i>Reliability</i>                                     |                                    |         |
| $\Delta \log k$                                        | $\pm 0.15$                         | 298     |
| $\Delta E/R$                                           | $\pm 100$                          | 260-300 |

1681  
1682  
1683

### Comments on Preferred Values

1684 There is good agreement between the rate coefficients measured in the absolute rate study by Antiñolo  
1685 et al. (2017) and the relative rate studies by Nilsson et al. (2009) and Zhang et al. (2015). There was  
1686 no discernible effect of total pressure over the range 45-300 Torr in the study by Antiñolo et al. (2017)  
1687 indicating that the reaction is at, or near, the high-pressure limit for pressures above 45 Torr. The  
1688 preferred rate coefficient at 298 K is taken from the study by Antiñolo et al. (2017). The absolute rate  
1689 measurements reveals a small curvature in the Arrhenius plot. A fit of a modified Arrhenius expression  
1690 to the data set from Antiñolo et al. (2017) gives  $k = 1.46 \times 10^{-18} T^2 \exp(666/T) \text{ cm}^3 \text{ molecule}^{-1} \text{ s}^{-1}$ . The  
1691 preferred Arrhenius expression,  $k = A \exp(-B/T)$ , is centered at 280 K and is derived from the three-  
1692 parameter equation with  $A = C e^2 T^2$  and  $B = D + 2T$ .  
1693 The HO radical initiated oxidation of  $\text{CF}_3\text{CH}=\text{CHF}$  in air yields  $\text{CF}_3\text{C}(\text{O})\text{H}$  and  $\text{HC}(\text{O})\text{F}$  as products  
1694 (Javadi et al., 2008).

1695  
1696  
1697

### References

- 1698 Antiñolo, M., Bravo, I., Jiménez, E., Ballesteros, B., and Albaladejo, J.: J. Phys. Chem. A, 121, 8322,  
1699 2017.
- 1700 Atkinson, R., Baulch, D. L., Cox, R. A., Crowley, J. N., Hampson, R. F., Hynes, R. G., Jenkin, M. E.,  
1701 Rossi, M. J., and Troe, J.: Atmos. Chem. Phys., 6, 3625, 2006; IUPAC Task Group on  
1702 Atmospheric Chemical Kinetic Data Evaluation, <https://iupac.aeris-data.fr/>
- 1703 Calvert, J. G., Derwent, R. G., Orlando, J. J., Tyndall, G. S., and Wallington T. J.: Mechanisms of  
1704 Atmospheric Oxidation of the Alkanes, Oxford University Press, New York, NY, 2008.
- 1705 Javadi, M. S., Søndergaard, R., Nielsen, O. J., Hurley, M. D., and Wallington, T. J.: Atmos. Chem. and  
1706 Phys., 8, 3141, 2008.
- 1707 Nilsson, E. J. K., Nielsen, O. J., Johnson, M. S., Hurley, M. D., and Wallington, T. J.: Chem. Phys.  
1708 Lett., 473, 233 (2009).
- 1709 Zhang, N., Chen, L., Mizukado, J., Quan, H., and Suda, H.: Chem. Phys. Lett, 621, 78, 2015.
- 1710  
1711

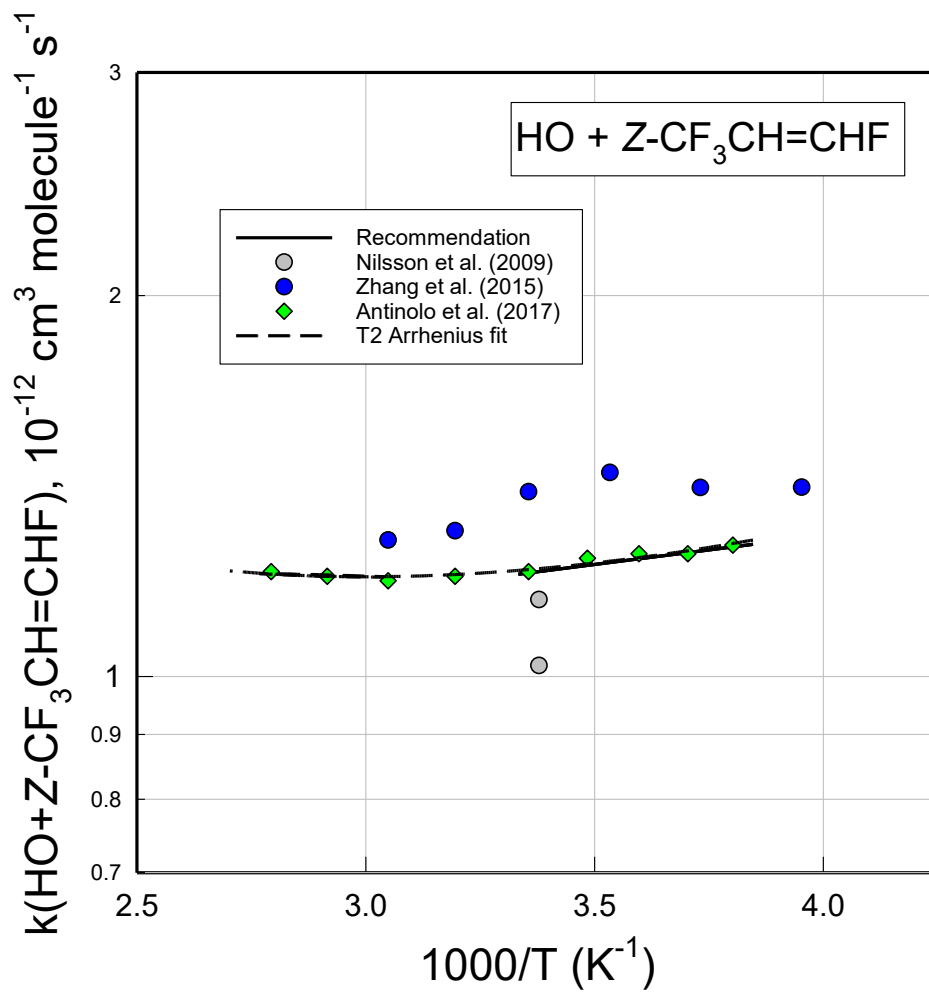

1712  
1713

1714 **oFOx118: HO + E-CF<sub>3</sub>CF=CHF**  
1715 Last evaluated: June 2025; Last change in preferred values: January 2023.

1716  
1717 **HO + E-CF<sub>3</sub>CF=CHF → products**

1718  
1719 **Rate coefficient data**

1720

| <i>k</i> /cm <sup>3</sup> molecule <sup>-1</sup> s <sup>-1</sup> | Temp./K | Reference            | Technique/ Comments |
|------------------------------------------------------------------|---------|----------------------|---------------------|
| <i>Relative Rate Coefficients</i>                                |         |                      |                     |
| (2.05 ± 0.20) × 10 <sup>-12</sup>                                | 296     | Hurley et al. (2007) | RR (a)              |
| (2.12 ± 0.23) × 10 <sup>-12</sup>                                | 296     |                      |                     |

1721  
1722 **Comments**

1723  
1724 (a) Photolysis of CH<sub>3</sub>ONO in 700 Torr (933 mbar) of air diluent was used to generate HO radicals.  
1725 The loss of E-CF<sub>3</sub>CF=CHF was measured relative to those of C<sub>2</sub>H<sub>2</sub> and C<sub>2</sub>H<sub>4</sub> and used to  
1726 measure the rate coefficient ratios  $k(E-CF_3CF=CHF)/k(C_2H_2) = 2.74 \pm 0.27$  and  $k(E-$   
1727  $CF_3CF=CHF)/k(C_2H_4) = 0.27 \pm 0.03$ . Using  $k(HO + C_2H_2) = 7.47 \times 10^{-13}$  and  $k(HO + C_2H_4) =$   
1728  $7.85 \times 10^{-12}$  (Atkinson et al., 2006) gives  $k(HO + E-CF_3CF=CHF) = (2.05 \pm 0.20) \times 10^{-12}$  and  
1729  $(2.12 \pm 0.23) \times 10^{-12}$  cm<sup>3</sup> molecule<sup>-1</sup> s<sup>-1</sup>.

1730  
1731 **Preferred Values**

1732

| Parameter                                                        | Value                   | T/K |
|------------------------------------------------------------------|-------------------------|-----|
| <i>k</i> /cm <sup>3</sup> molecule <sup>-1</sup> s <sup>-1</sup> | 2.2 × 10 <sup>-12</sup> | 298 |
| <i>Reliability</i>                                               |                         |     |
| Δ log <i>k</i>                                                   | 0.15                    | 298 |

1733  
1734 *Comments on Preferred Values*

1735  
1736 The preferred rate coefficient at 298 K is based on the results from the study by Hurley et al.  
1737 (2007). Tovar et al. (2014) and Rivela et al. (2019) reported the results of a relative rate study of the  
1738 reaction of a mixture of the two isomers E- and Z-CF<sub>3</sub>CF=CHF over the temperature range 287-313  
1739 K. The isomeric composition of the sample was not measured and the IR feature(s) used to follow the  
1740 loss of (E/Z)-CF<sub>3</sub>CF=CHF were not stated so it is unclear which isomer(s) was being studied.  
1741 However, judging from the similarity of the reported rate coefficient at 298 K with that for E-  
1742 CF<sub>3</sub>CF=CHF reported by Hurley et al. (2007) it appears that Tovar et al. (2014) and Rivela et al.  
1743 (2019) were mainly measuring the kinetics of the E-CF<sub>3</sub>CF=CHF isomer. The rate coefficients  
1744 reported by Tovar et al. (2014) and Rivela et al. (2019) at 298 K were (2.62 ± 0.76) × 10<sup>-12</sup> and (2.85 ±  
1745 0.78) × 10<sup>-12</sup> cm<sup>3</sup> molecule<sup>-1</sup> s<sup>-1</sup> and are consistent within the combined uncertainties with the  
1746 preferred value for the E-CF<sub>3</sub>CF=CHF isomer.

1747  
1748 **References**

1749  
1750 Atkinson, R., Baulch, D. L., Cox, R. A., Crowley, J. N., Hampson, R. F., Hynes, R. G., Jenkin, M.  
1751 E., Rossi, M. J., and Troe, J.: Atmos. Chem. Phys., 6, 3625, 2006; IUPAC Task Group on  
1752 Atmospheric Chemical Kinetic Data Evaluation, <https://iupac.aeris-data.fr/>

1753  
1754  
1755  
1756  
1757  
1758

Hurley, M. D., Ball, J. C., and Wallington, T. J.: J. Phys. Chem. A, 111, 9789, 2007.  
Rivela, C. B., Tovar, C. M., Teruel, M. A., Barnes, I., and Wiesen, P.: Chem. Phys. Lett., 714, 190, 2019.  
Tovar, C. M., Blanco, M. B., Barnes, I., Wiesen, P., and Teruel, M. A.: Atmos. Env., 88, 107, 2014.

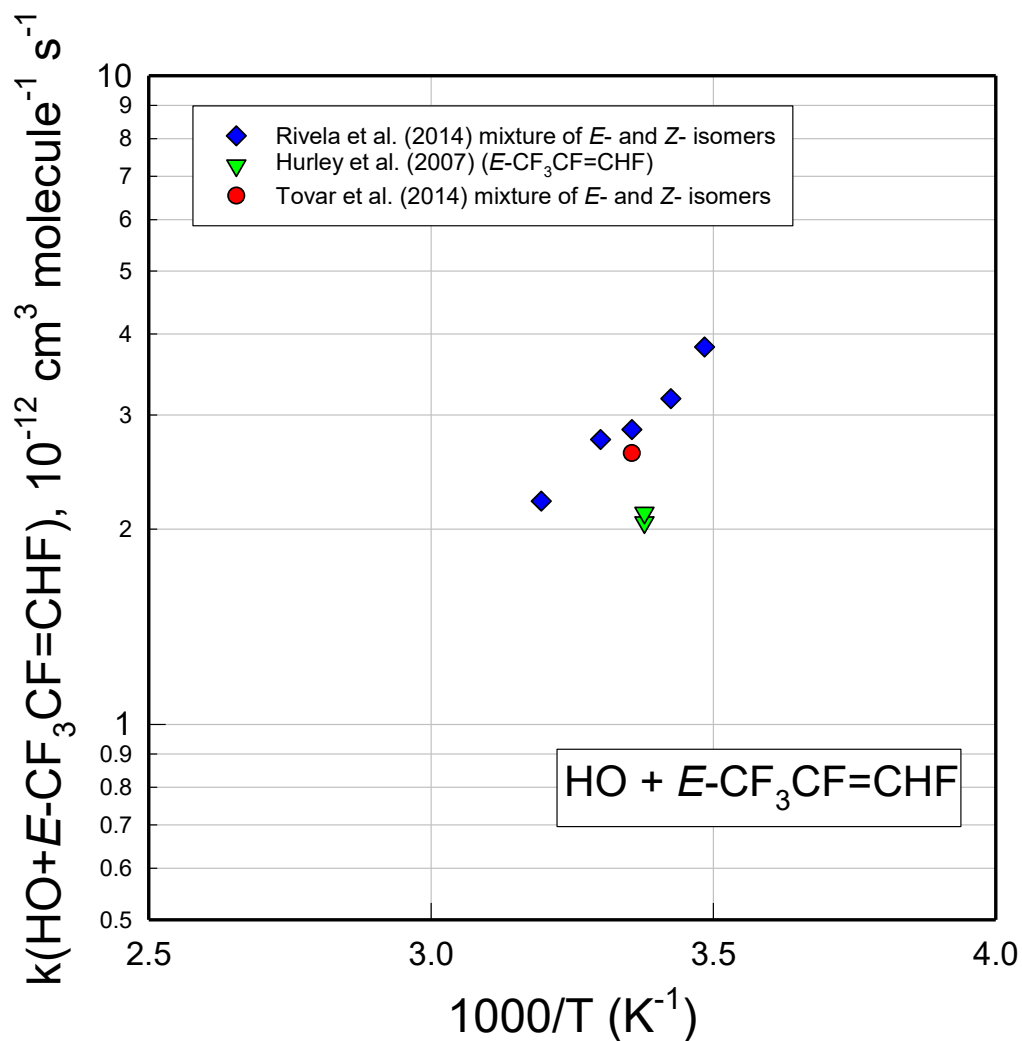

1759  
1760  
1761

1762  
1763  
1764  
1765  
1766  
1767  
1768

**oFOx119: HO + Z-CF<sub>3</sub>CF=CHF (HFO-1225ye(Z))**

Last evaluated: June 2025; Last change in preferred values: January 2023.

**HO + Z-CF<sub>3</sub>CF=CHF (HFO-1225ye(Z)) → products**

**Rate coefficient data**

| <i>k</i> /cm <sup>3</sup> molecule <sup>-1</sup> s <sup>-1</sup> | Temp./K | Reference                   | Technique/ Comments |
|------------------------------------------------------------------|---------|-----------------------------|---------------------|
| <i>Absolute Rate Coefficients</i>                                |         |                             |                     |
| 1.6 × 10 <sup>-18</sup> T <sup>2</sup> exp(655/T)                | 206-380 | Papadimitriou et al. (2008) | PLP-LIF (a)         |
| 1.28 × 10 <sup>-12</sup>                                         | 298     |                             |                     |
| <i>Relative Rate Coefficients</i>                                |         |                             |                     |
| (1.15 ± 0.11) × 10 <sup>-12</sup>                                | 296     | Hurley et al. (2007)        | RR (b)              |
| (1.26 ± 0.08) × 10 <sup>-12</sup>                                | 296     |                             |                     |

1769  
1770  
1771  
1772  
1773  
1774  
1775  
1776  
1777  
1778  
1779  
1780  
1781  
1782  
1783  
1784

**Comments**

- (a) HO radicals were produced using the pulsed laser photolysis of either H<sub>2</sub>O<sub>2</sub> or HNO<sub>3</sub> at 248 nm. Experiments at 296K were conducted in a total pressure of 25-600 Torr (33-800 mbar) using helium, nitrogen, or SF<sub>6</sub> diluent. There was no discernable effect of total pressure or diluent on the kinetics of the reaction.
- (b) Photolysis of CH<sub>3</sub>ONO in 700 Torr (933 mbar) of air diluent was used to generate HO radicals. The loss of Z-CF<sub>3</sub>CF=CHF was measured relative to those of C<sub>2</sub>H<sub>2</sub> and C<sub>2</sub>H<sub>4</sub> and used to derive rate coefficient ratios  $k(\text{Z-CF}_3\text{CF=CHF})/k(\text{C}_2\text{H}_2) = 1.54 \pm 0.15$  and  $k(\text{Z-CF}_3\text{CF=CHF})/k(\text{C}_2\text{H}_4) = 0.16 \pm 0.01$ . Using  $k(\text{HO} + \text{C}_2\text{H}_2) = 7.47 \times 10^{-13}$  and  $k(\text{HO} + \text{C}_2\text{H}_4) = 7.85 \times 10^{-12}$  (Atkinson et al., 2006) gives  $k(\text{HO} + \text{Z-CF}_3\text{CF=CHF}) = (1.15 \pm 0.11) \times 10^{-12}$  and  $(1.26 \pm 0.08) \times 10^{-12}$  cm<sup>3</sup> molecule<sup>-1</sup> s<sup>-1</sup>.

**Preferred Values**

| Parameter                                                        | Value                               | T/K     |
|------------------------------------------------------------------|-------------------------------------|---------|
| <i>k</i> /cm <sup>3</sup> molecule <sup>-1</sup> s <sup>-1</sup> | 1.2 × 10 <sup>-12</sup>             | 298     |
|                                                                  | 7.60 × 10 <sup>-13</sup> exp(155/T) | 200-300 |
| <i>Reliability</i>                                               |                                     |         |
| Δ log <i>k</i>                                                   | 0.10                                | 298     |
| Δ E/R                                                            | ±100                                | 200-300 |

1785  
1786  
1787  
1788  
1789  
1790  
1791  
1792  
1793  
1794  
1795  
1796

*Comments on Preferred Values*

There is excellent agreement between the results from the absolute rate study by Papadimitriou et al. (2008) and the relative rate study by Hurley et al. (2007). The preferred rate constant at 298 K is taken from the temperature dependent expression provided by Papadimitriou et al. (2008). There is significant curvature in the Arrhenius plot. Fitting the three parameter equation,  $k = CT^2 \exp(-D/T)$  to the data from Papadimitriou et al. (2008) gives  $k(\text{HO} + \text{Z-CF}_3\text{CF=CHF}) = 1.62 \times 10^{-18} T^2 \exp(655/T)$  cm<sup>3</sup> molecule<sup>-1</sup> s<sup>-1</sup>. The preferred Arrhenius expression,  $k = A \exp(-B/T)$ , is centered at 250 K and is derived from the three-parameter equation with  $A = C e^2 T^2$  and  $B = D + 2T$  with the A factor adjusted to return the preferred rate coefficient at 298 K. Note that the preferred Arrhenius expression should not be used outside the specified temperature range (200-300 K); rather, the full three

1797 parameter expression should be used.

1798 Tovar et al. (2014) and Rivela et al. (2019) have reported the results of a relative rate study of  
1799 the reaction of a mixture of the two isomers *E*- and *Z*-CF<sub>3</sub>CF=CHF over the temperature range 287-  
1800 313 K. The isomeric composition of the sample was not measured and the IR feature(s) used to follow  
1801 the loss of (*E/Z*)-CF<sub>3</sub>CF=CHF were not stated. However, judging from the similarity of the reported  
1802 rate coefficients at 298 K of  $(2.62 \pm 0.76) \times 10^{-12}$  and  $(2.85 \pm 0.78) \times 10^{-12}$  cm<sup>3</sup> molecule<sup>-1</sup> s<sup>-1</sup> with the  
1803 values for  $k(\text{HO} + E\text{-CF}_3\text{CF}=\text{CHF}) = (2.05 \pm 0.20) \times 10^{-12}$  and  $(2.12 \pm 0.23) \times 10^{-12}$  cm<sup>3</sup> molecule<sup>-1</sup> s<sup>-1</sup>  
1804 reported by Hurley et al. (2008) it appears that Tovar et al. (2014) and Rivela et al. (2019) were  
1805 mainly measuring the kinetics of the *E*-CF<sub>3</sub>CF=CHF isomer.

## 1806 1807 1808 1809 1810 1811 1812 1813 1814 1815 1816 1817 1818

### References

- Atkinson, R., Baulch, D. L., Cox, R. A., Crowley, J. N., Hampson, R. F., Hynes, R. G., Jenkin, M.  
E., Rossi, M. J., and Troe, J.: Atmos. Chem. Phys., 6, 3625, 2006; IUPAC Task Group on  
Atmospheric Chemical Kinetic Data Evaluation, <https://iupac.aeris-data.fr/>  
Hurley, M. D., Ball, J. C., Wallington, T. J.: J. Phys. Chem. A, 111, 9789, 2007.  
Papadimitriou, V. C., Talukdar, R. K., Portmann, R. W., Ravishankara, A. R., and Burkholder, J.  
B.: Phys. Chem. Chem. Phys., 10, 808, 2008.  
Rivela, C. B., Tovar, C. M., Teruel, M. A., Barnes, I., and Wiesen, P.: Chem. Phys. Lett., 714, 190,  
2019.  
Tovar, C. M., Blanco, M. B., Barnes, I., Wiesen, P., and Teruel, M. A.: Atmos. Env., 88, 107, 2014.

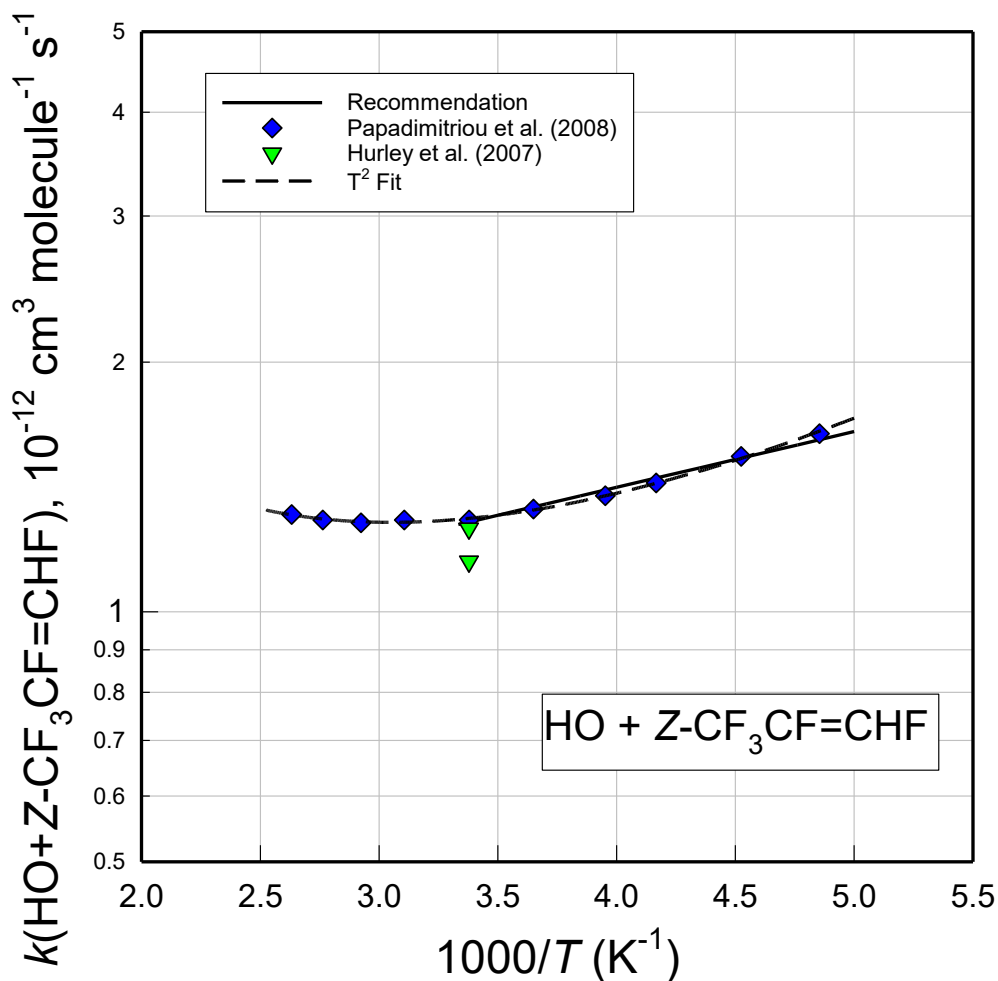

1819  
1820  
1821  
1822

1825  
 1826 **HO + CF<sub>3</sub>CF=CF<sub>2</sub> (FO-1216) → products**

1827  
 1828 **Rate coefficient data**

| <i>k</i> /cm <sup>3</sup> molecule <sup>-1</sup> s <sup>-1</sup> | Temp./K | Reference                | Technique/ Comments |
|------------------------------------------------------------------|---------|--------------------------|---------------------|
| <i>Absolute Rate Coefficients</i>                                |         |                          |                     |
| See comment (a)                                                  | 293-831 | McIlroy and Tully (1993) | FP-RF (a)           |
| $(2.27 \pm 0.05) \times 10^{-12}$                                | 293     |                          |                     |
| $5.66 \times 10^{-13} \exp(-407/T)$                              | 252-370 | Orkin et al. (1997)      | FP-RF (b)           |
| $(2.17 \pm 0.01) \times 10^{-12}$                                | 298     |                          |                     |
| $8.74 \times 10^{-13} \exp(260/T)$                               | 250-430 | Tokuhashi et al. (2000)  | FP-LIF (c)          |
| $(2.12 \pm 0.02) \times 10^{-12}$                                | 298     |                          |                     |
| $9.75 \times 10^{-14} (T/298)^{1.98} \exp(922/T)$                | 230-480 | Orkin et al. (2011)      | FP-LIF (d)          |
| $(2.16 \pm 0.07) \times 10^{-12}$                                | 298     |                          |                     |
| <i>Relative Rate Coefficients</i>                                |         |                          |                     |
| $(2.28 \pm 0.16) \times 10^{-12}$                                | 296     | Mashino et al. (2000)    | RR (e)              |
| $(1.98 \pm 0.11) \times 10^{-12}$                                | 296     |                          |                     |
| $(2.47 \pm 0.43) \times 10^{-12}$                                | 298     | Acerboni et al. (2001)   | RR (f)              |
| $(3.29 \pm 0.91) \times 10^{-12}$                                | 298     |                          |                     |

1830  
 1831 **Comments**

- 1832
- 1833 (a) HO radicals were generated by the photolysis of H<sub>2</sub>O by a xenon flash lamp in 75-750 Torr (76-  
 1834 760 mbar) of argon diluent. Single-exponential decays were observed over the temperature ranges  
 1835 293-489 K and 656-831 K while bi-exponential decays were observed for the intermediate  
 1836 temperature range 528-641 K. There was no discernable effect of total pressure over the range  
 1837 studied on the rate of reaction at 293 K. Fitting the Arrhenius expression to the data from 293-489  
 1838 K gave  $k = (9.95 \pm 0.64) \times 10^{-13} \exp [(486 \pm 44 \text{ cal})/RT] \text{ cm}^3 \text{ molecule}^{-1} \text{ s}^{-1}$ . A small but distinct  
 1839 curvature was evident in the Arrhenius plot and a modified Arrhenius expression,  $k = 1.115 \times 10^{-13}$   
 1840  $(T/298)^{2.03} \exp(552/T) \text{ cm}^3 \text{ molecule}^{-1} \text{ s}^{-1}$  was used to best represent the data.
- 1841 (b) HO radicals were produced by the photolysis of H<sub>2</sub>O by a xenon flash lamp in 100 Torr (133  
 1842 mbar) of argon diluent.
- 1843 (c) HO radicals were produced by the xenon flash lamp photolysis of H<sub>2</sub>O, or pulsed ArF excimer laser  
 1844 photolysis of N<sub>2</sub>O to produce O(<sup>1</sup>D) atoms which were then reacted with either H<sub>2</sub>O or CH<sub>4</sub> to  
 1845 give HO radicals, or pulsed laser photolysis of H<sub>2</sub>O<sub>2</sub>. HO radicals were monitored by laser  
 1846 induced fluorescence. Experiments were conducted in 5-200 Torr of helium, or argon, diluent.  
 1847 There was no discernible effect of pressure or diluent gas over the range studied. Results from  
 1848 experiments using four different sources of HO radicals were indistinguishable.
- 1849 (d) HO radicals were produced by the photolysis of H<sub>2</sub>O by a xenon flash lamp in 30-100 Torr (40-  
 1850 133 mbar) of argon diluent.
- 1851 (e) Photolysis of CH<sub>3</sub>ONO in 700 Torr (933 mbar) of air diluent was used to generate HO radicals.  
 1852 The loss of CF<sub>3</sub>CF=CF<sub>2</sub> was measured relative to C<sub>2</sub>H<sub>2</sub> and C<sub>2</sub>H<sub>4</sub> and used to measure the rate  
 1853 coefficient ratios  $k(\text{CF}_3\text{CF}=\text{CF}_2)/k(\text{C}_2\text{H}_2) = 2.65 \pm 0.15$  and  $k(\text{CF}_3\text{CF}=\text{CF}_2)/k(\text{C}_2\text{H}_4) = 0.29 \pm 0.02$ .  
 1854 Using  $k(\text{HO} + \text{C}_2\text{H}_2) = 7.47 \times 10^{-13}$  and  $k(\text{HO} + \text{C}_2\text{H}_4) = 7.85 \times 10^{-12}$  (Atkinson et al., 2006) gives  
 1855  $k(\text{HO} + \text{CF}_3\text{CF}=\text{CF}_2) = (2.28 \pm 0.16) \times 10^{-13}$  and  $(1.98 \pm 0.11) \times 10^{-13} \text{ cm}^3 \text{ molecule}^{-1} \text{ s}^{-1}$ .
- 1856 (f) Photolysis of CH<sub>3</sub>ONO in 740 Torr (986 mbar) of air diluent was used to generate HO radicals.  
 1857 The loss of CF<sub>3</sub>CF=CF<sub>2</sub> was measured relative to C<sub>2</sub>H<sub>4</sub> and C<sub>3</sub>H<sub>6</sub> and used to measure the rate

1858 coefficient ratios  $k(\text{CF}_3\text{CF}=\text{CF}_2)/k(\text{C}_2\text{H}_4) = 0.3151 \pm 0.0552$  and  $k(\text{CF}_3\text{CF}=\text{CF}_2)/k(\text{C}_3\text{H}_6) =$   
 1859  $0.1153 \pm 0.0321$ . Using  $k(\text{HO} + \text{C}_2\text{H}_4) = 7.85 \times 10^{-12} \text{ cm}^3 \text{ molecule}^{-1} \text{ s}^{-1}$  and  $k(\text{HO} + \text{C}_3\text{H}_6) = 2.85$   
 1860  $\times 10^{-11} \text{ cm}^3 \text{ molecule}^{-1} \text{ s}^{-1}$  (Atkinson et al., 2006) gives  $k(\text{HO} + \text{CF}_3\text{CF}=\text{CF}_2) = (2.47 \pm 0.43) \times 10^{-$   
 1861  $12$  and  $(3.29 \pm 0.91) \times 10^{-12} \text{ cm}^3 \text{ molecule}^{-1} \text{ s}^{-1}$ .

### 1862 Preferred Values

1863

| Parameter                                              | Value                              | T/K     |
|--------------------------------------------------------|------------------------------------|---------|
| $k / \text{cm}^3 \text{ molecule}^{-1} \text{ s}^{-1}$ | $2.18 \times 10^{-12}$             | 298     |
| $k / \text{cm}^3 \text{ molecule}^{-1} \text{ s}^{-1}$ | $7.38 \times 10^{-13} \exp(322/T)$ | 240-340 |
| 1865 <i>Reliability</i>                                |                                    |         |
| $\Delta \log k$                                        | $\pm 0.04$                         | 298     |
| $\Delta E/R$                                           | $\pm 100$                          | 240-340 |

1866

### 1867 *Comments on Preferred Values*

1868

1869 The results from the absolute rate studies of McIlroy et al. (1993), Orkin et al (1997, 2011) and  
 1870 Tokuhashi et al. (2000) and the relative rate studies of Aceboni et al. (2001) and Mashino et al.  
 1871 (2000) are in good agreement within the experimental uncertainties. There is excellent agreement  
 1872 in the reported rate coefficients from the absolute rate studies at 298 K. The preferred value at 298  
 1873 K is the average of the measurements by McIlroy et al. (1993), Orkin et al (1997, 2011) and  
 1874 Tokuhashi et al. (2000). There is significant curvature in the Arrhenius plot. Fitting the expression  $k$   
 1875  $= CT^2 \exp(-D/T)$  to the  $240\text{K} < T < 500\text{K}$  data from McIlroy et al. (1993), Orkin et al (1997, 2011)  
 1876 and Tokuhashi et al. (2000) and adjusting the pre-exponential A-factor to return the preferred value  
 1877 at 298 K gives  $k(\text{HO} + \text{CF}_3\text{CF}=\text{CF}_2) = 1.11 \times 10^{-18} T^2 \exp(922/T) \text{ cm}^3 \text{ molecule}^{-1} \text{ s}^{-1}$ . The preferred  
 1878 Arrhenius expression,  $k = A \exp(-B/T)$ , is centered at 300 K and is derived from the three-parameter  
 1879 equation with  $A = C e^2 T^2$  and  $B = D + 2T$ . Note that the preferred Arrhenius expression should not be  
 1880 used outside the specified temperature range (240-340 K); rather, the modified expression should be  
 1881 used.

1882

1883

### 1884 References

1885

1885 Acerboni, G., Beukes, J. A., Jensen, N. R., Hjorth, J., Myhre, G., Nielsen, C. J., and Sundet, J. K.:  
 1886 *Atmos. Environ.*, 35, 4113, 2001.

1887

1887 Atkinson, R., Baulch, D. L., Cox, R. A., Crowley, J. N., Hampson, R. F., Hynes, R. G., Jenkin, M.  
 1888 E., Rossi, M. J., and Troe, J.: *Atmos. Chem. Phys.*, 6, 3625, 2006; IUPAC Task Group on  
 1889 Atmospheric Chemical Kinetic Data Evaluation, <https://iupac.aeris-data.fr/>

1890

1890 Javadi, M. S., Søndergaard, R., Nielsen, O. J., Hurley, M. D., and Wallington, T. J.: *Atmos. Chem.*  
 1891 *Phys.*, 8, 3141, 2008.

1892

1892 Mashino, M., Ninomiya, Y., Kawasaki, M., Wallington, T. J., and Hurley, M. D.: *J. Phys. Chem. A*  
 1893 104, 7255, 2000.

1894

1894 McIlroy, A., and Tully, F. P.: *J. Phys. Chem.*, 97, 610, 1993.

1895

1895 Søndergaard, R., Nielsen, O. J.; Hurley, M. D., Wallington, T. J.; and Singh, R.: *Chem. Phys. Lett.*,  
 1896 443, 199, 2007.

1897

1897 Orkin, V. L., Huie, R. E., and Kurylo, M. J.: *J. Phys. Chem. A*, 101, 9118, 1997.

1898

1898 Orkin, V. L., Poskrebyshev, G. A., and Kurylo, M. J.: *J. Phys. Chem. A*, 115, 6568, 2011.

1899

1899 Tokuhashi, K., Takahashi, A., Kaise, M., Kondo, S., Sekiya, A., and Fujimoto, E.: *Chem. Phys.*  
 1900 *Lett.*, 325, 189, 2000.

1901

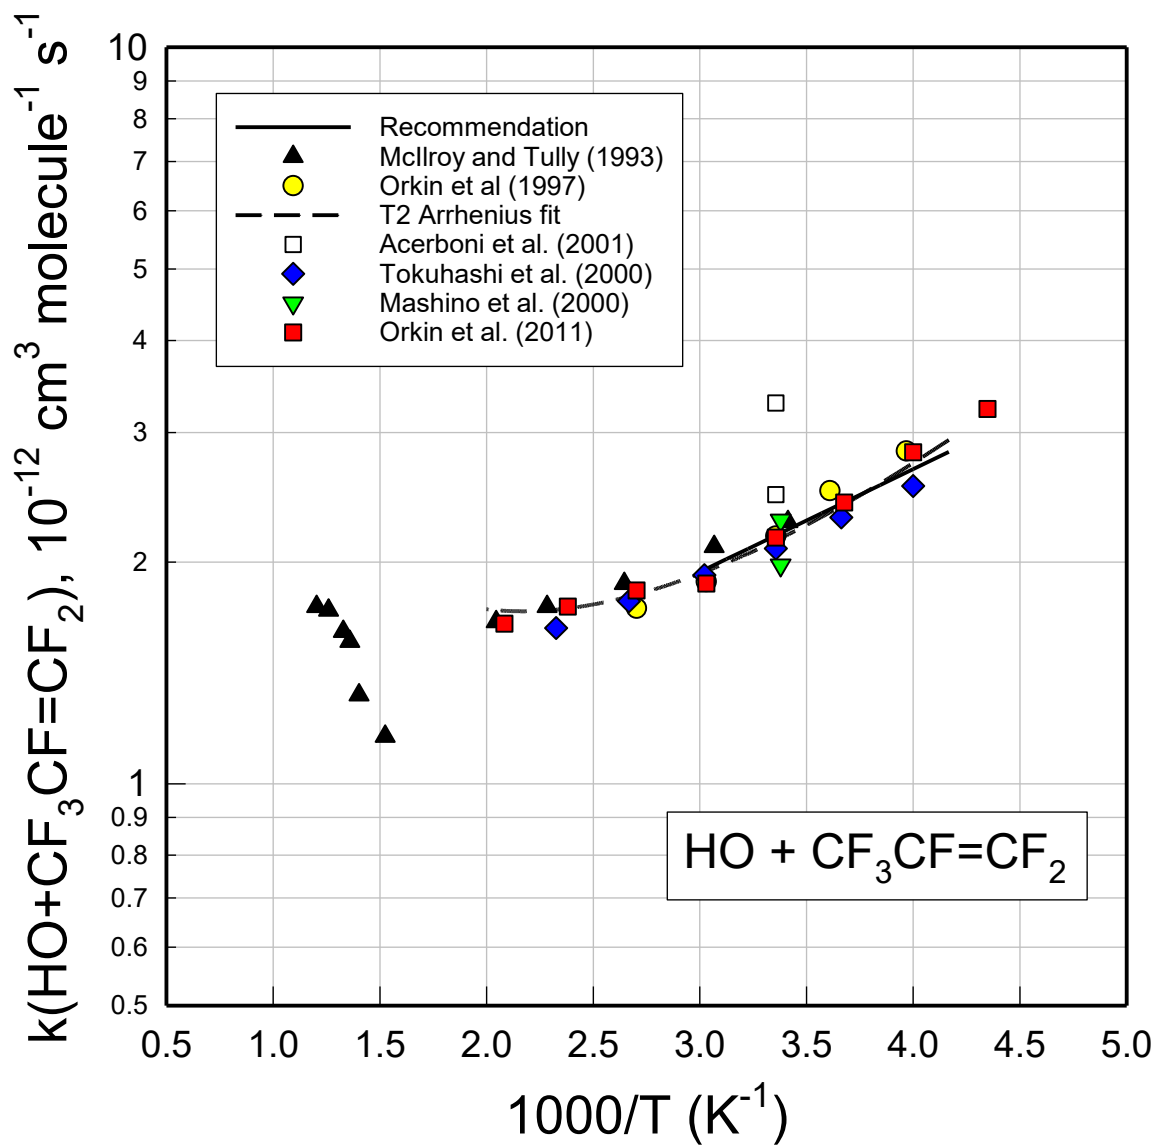

1907  
 1908  
 1909  
 1910  
 1911

**HO + E-CF<sub>3</sub>CH=CHCF<sub>3</sub> (HFO-1336mzz(E)) → products**

**Rate coefficient data**

| $k/\text{cm}^3 \text{ molecule}^{-1} \text{ s}^{-1}$  | Temp./K | Reference                | Technique/ Comments |
|-------------------------------------------------------|---------|--------------------------|---------------------|
| <i>Absolute Rate Coefficients</i>                     |         |                          |                     |
| $(6.94 \pm 0.80) \times 10^{-13} \exp(-496 \pm 10/T)$ | 211-374 | Baasandorj et al. (2018) | LP-LIF (a)          |
| $(1.31 \pm 0.15) \times 10^{-13}$                     | 298     |                          |                     |
| <i>Relative Rate Coefficients</i>                     |         |                          |                     |
| $(1.47 \pm 0.21) \times 10^{-13}$                     | 296     | Østerstrøm et al. (2017) | RR (b)              |
| $(1.88 \pm 0.24) \times 10^{-13}$                     | 296     |                          |                     |
| $1.18 \times 10^{-12} \exp(-668/T)$                   | 296-375 | Baasandorj et al. (2018) | RR (c)              |
| $(1.21 \pm 0.10) \times 10^{-13}$                     | 296     |                          |                     |
| $5.91 \times 10^{-13} \exp(-515/T)$                   | 253-328 | Qing et al. (2018)       | RR (d)              |
| $(1.10 \pm 0.02) \times 10^{-13}$                     | 298     |                          |                     |
| $4.62 \times 10^{-13} \exp(-423/T)$                   | 253-328 | Qing et al. (2018)       | RR (e)              |
| $(1.21 \pm 0.10) \times 10^{-13}$                     | 298     |                          |                     |

1912  
 1913  
 1914

**Comments**

- 1915 (a) HO radicals were generated by 248 nm laser photolysis of H<sub>2</sub>O<sub>2</sub> or (CH<sub>3</sub>)<sub>3</sub>COOH in 2.5-200 Torr  
 1916 of He or N<sub>2</sub> and were monitored using laser induced fluorescence. There was no discernible effect  
 1917 of pressure or diluent gas on the rate coefficient.
- 1918 (b) HO radicals were generated by the photolysis of (CH<sub>3</sub>)<sub>2</sub>CHONO or CH<sub>3</sub>ONO in 700 Torr air/N<sub>2</sub>/O<sub>2</sub>  
 1919 in the presence of NO. The loss of E-CF<sub>3</sub>CH=CHCF<sub>3</sub> was monitored relative to C<sub>3</sub>H<sub>8</sub> and C<sub>2</sub>H<sub>6</sub>  
 1920 using FTIR spectroscopy. Rate coefficient ratios of  $k(E\text{-CF}_3\text{CH=CHCF}_3)/k(\text{C}_3\text{H}_8) = 0.14 \pm 0.02$  and  
 1921  $k(E\text{-CF}_3\text{CH=CHCF}_3)/k(\text{C}_2\text{H}_6) = 0.80 \pm 0.10$  were measured. Using  $k(\text{HO} + \text{C}_3\text{H}_8) = 1.05 \times 10^{-12}$  and  
 1922  $k(\text{HO} + \text{C}_2\text{H}_6) = 2.35 \times 10^{-13} \text{ cm}^3 \text{ molecule}^{-1} \text{ s}^{-1}$  (Atkinson et al., 2006) at 296 K gives  $k(\text{HO} + E\text{-}$   
 1923  $\text{CF}_3\text{CH=CHCF}_3) = (1.47 \pm 0.21) \times 10^{-13}$  and  $(1.88 \pm 0.24) \times 10^{-13} \text{ cm}^3 \text{ molecule}^{-1} \text{ s}^{-1}$ .
- 1924 (c) HO radicals were generated by the pulsed laser photolysis of O<sub>3</sub> in the presence of H<sub>2</sub>O in 100 Torr  
 1925 of He at 296-375 K. The loss of E-CF<sub>3</sub>CH=CHCF<sub>3</sub> was monitored relative to that of C<sub>2</sub>H<sub>6</sub> by FTIR  
 1926 spectroscopy. At 296 K a rate coefficient ratio of  $k(E\text{-CF}_3\text{CH=CHCF}_3)/k(\text{C}_2\text{H}_6) = 0.50 \pm 0.04$  was  
 1927 measured. Using  $k(\text{C}_2\text{H}_6) = 6.9 \times 10^{-13} \exp(-1000/T) \text{ cm}^3 \text{ molecule}^{-1} \text{ s}^{-1}$  (IUPAC, 2024) gives  $k(E\text{-}$   
 1928  $\text{CF}_3\text{CH=CHCF}_3) = (1.21 \pm 0.10) \times 10^{-13} \text{ cm}^3 \text{ molecule}^{-1} \text{ s}^{-1}$ . Rate coefficient ratios at 296-375 K were  
 1929 scaled to  $k(\text{C}_2\text{H}_6) = 6.9 \times 10^{-13} \exp(-1000/T) \text{ cm}^3 \text{ molecule}^{-1} \text{ s}^{-1}$  (IUPAC, 2024) and an Arrhenius fit  
 1930 to the results gives  $k(E\text{-CF}_3\text{CH=CHCF}_3) = 1.18 \times 10^{-12} \exp(-668/T) \text{ cm}^3 \text{ molecule}^{-1} \text{ s}^{-1}$ .
- 1931 (d) Photolysis of O<sub>3</sub> in the presence of water vapor in 200 Torr of helium was used to generate HO  
 1932 radicals. The loss of E-CF<sub>3</sub>CH=CHCF<sub>3</sub> was measured relative to C<sub>2</sub>H<sub>6</sub> over the temperature range  
 1933 253-328 K. A rate coefficient ratio of  $k(E\text{-CF}_3\text{CH=CHCF}_3)/k(\text{C}_2\text{H}_6) = 0.458 \pm 0.002$  was reported at  
 1934 298 K. Using  $k(\text{C}_2\text{H}_6) = 6.9 \times 10^{-13} \exp(-1000/T)$  (IUPAC, 2024) gives  $k(E\text{-CF}_3\text{CH=CHCF}_3) =$   
 1935  $(1.21 \pm 0.10) \times 10^{-13} \text{ cm}^3 \text{ molecule}^{-1} \text{ s}^{-1}$ . Rate coefficient ratios at 253-328 K were scaled to  $k(\text{C}_2\text{H}_6) =$   
 1936  $6.9 \times 10^{-13} \exp(-1000/T) \text{ cm}^3 \text{ molecule}^{-1} \text{ s}^{-1}$  (IUPAC, 2024) and an Arrhenius fit to the results gives  
 1937  $k(E\text{-CF}_3\text{CH=CHCF}_3) = 5.91 \times 10^{-13} \exp(-515/T) \text{ cm}^3 \text{ molecule}^{-1} \text{ s}^{-1}$ .
- 1938 (e) Photolysis of O<sub>3</sub> in the presence of water vapor in 200 Torr of helium was used to generate HO  
 1939 radicals. The loss of E-CF<sub>3</sub>CH=CHCF<sub>3</sub> was measured relative to CH<sub>2</sub>FCH<sub>2</sub>F over the temperature  
 1940 range 253-328 K. A rate coefficient ratio of  $k(E\text{-CF}_3\text{CH=CHCF}_3)/k(\text{CH}_2\text{FCH}_2\text{F}) = 1.08 \pm 0.02$  was

1941 reported at 298 K. Using  $k(\text{CH}_2\text{FCH}_2\text{F}) = 1.5 \times 10^{-12} \exp(-800/T) \text{ cm}^3 \text{ molecule}^{-1} \text{ s}^{-1}$  (IUPAC, 2024)  
 1942 gives  $k(E\text{-CF}_3\text{CH=CHCF}_3) = (1.21 \pm 0.10) \times 10^{-13} \text{ cm}^3 \text{ molecule}^{-1} \text{ s}^{-1}$ . Rate coefficient ratios at 253-  
 1943 328 K were scaled to  $k(\text{CH}_2\text{FCH}_2\text{F}) = 1.5 \times 10^{-12} \exp(-800/T) \text{ cm}^3 \text{ molecule}^{-1} \text{ s}^{-1}$  (IUPAC, 2024) and  
 1944 an Arrhenius fit to the results gives  $k(\text{HO}+E\text{-CF}_3\text{CH=CHCF}_3) = 4.62 \times 10^{-13} \exp(-423/T) \text{ cm}^3$   
 1945  $\text{molecule}^{-1} \text{ s}^{-1}$ .

### 1946 Preferred Values

| 1947 | Parameter                                              | Value                               | T/K     |
|------|--------------------------------------------------------|-------------------------------------|---------|
| 1948 | $k / \text{cm}^3 \text{ molecule}^{-1} \text{ s}^{-1}$ | $1.31 \times 10^{-13}$              | 298     |
|      | $k / \text{cm}^3 \text{ molecule}^{-1} \text{ s}^{-1}$ | $6.94 \times 10^{-13} \exp(-496/T)$ | 210-380 |
| 1949 | <i>Reliability</i>                                     |                                     |         |
|      | $\Delta \log k$                                        | $\pm 0.06$                          | 298     |
|      | $\Delta E/R$                                           | $\pm 100$                           | 210-380 |

### 1950 Comments on Preferred Values

1951  
 1952  
 1953  
 1954 There is good agreement between the rate coefficients measured in the absolute and relative rate  
 1955 study by Baasandorj et al. (2018) and the relative rate study by Qing et al. (2018). The rate  
 1956 coefficient measured using  $\text{C}_3\text{H}_8$  as a reference by Østerstrøm et al. (2017) is in good agreement  
 1957 with the results from Baasandorj et al. (2018) and Qing et al. (2018). However, the rate coefficient  
 1958 ratio reported by Østerstrøm et al. using  $\text{C}_2\text{H}_6$  as a reference compound is approximately 60%  
 1959 larger than measured by Baasandorj et al. (2018) and Qing et al. (2018). A fit to the absolute rate  
 1960 data from Baasandorj et al. (2018) gives the preferred expression,  $k = 6.94 \times 10^{-13} \exp(-496/T) \text{ cm}^3$   
 1961  $\text{molecule}^{-1} \text{ s}^{-1}$ , is taken from Baasandorj et al. (2018) which gives  $k = 1.31 \times 10^{-13} \text{ cm}^3 \text{ molecule}^{-1}$   
 1962  $\text{s}^{-1}$  at 298 K.

### 1963 References

- 1964  
 1965  
 1966 Atkinson, R., Baulch, D. L., Cox, R. A., Crowley, J. N., Hampson, R. F., Hynes, R. G., Jenkin, M. E.,  
 1967 Rossi, M. J., and Troe, J.: Atmos. Chem. Phys., 6, 3625, 2006; IUPAC Task Group on  
 1968 Atmospheric Chemical Kinetic Data Evaluation, <https://iupac.aeris-data.fr/>  
 1969 Baasandorj, M., Marshall, P., Waterland, R. L., Ravishankara, A. R., and Burkholder, J. B.: J. Phys. Chem.  
 1970 A, 122, 4635-4646, 2018.  
 1971 Østerstrøm, F. F.; Andersen, S. T.; Sølling, T. I.; Nielsen, O. J.; and Sulbæk Andersen, M. P.: Phys.  
 1972 Chem. Chem. Phys. 19, 735–750, 2017.  
 1973 Qing, F., Guo, Q., Chen, L., Quan, H., and Mizukado, J.: Chem. Phys. Lett., 706, 93-98, 2018.

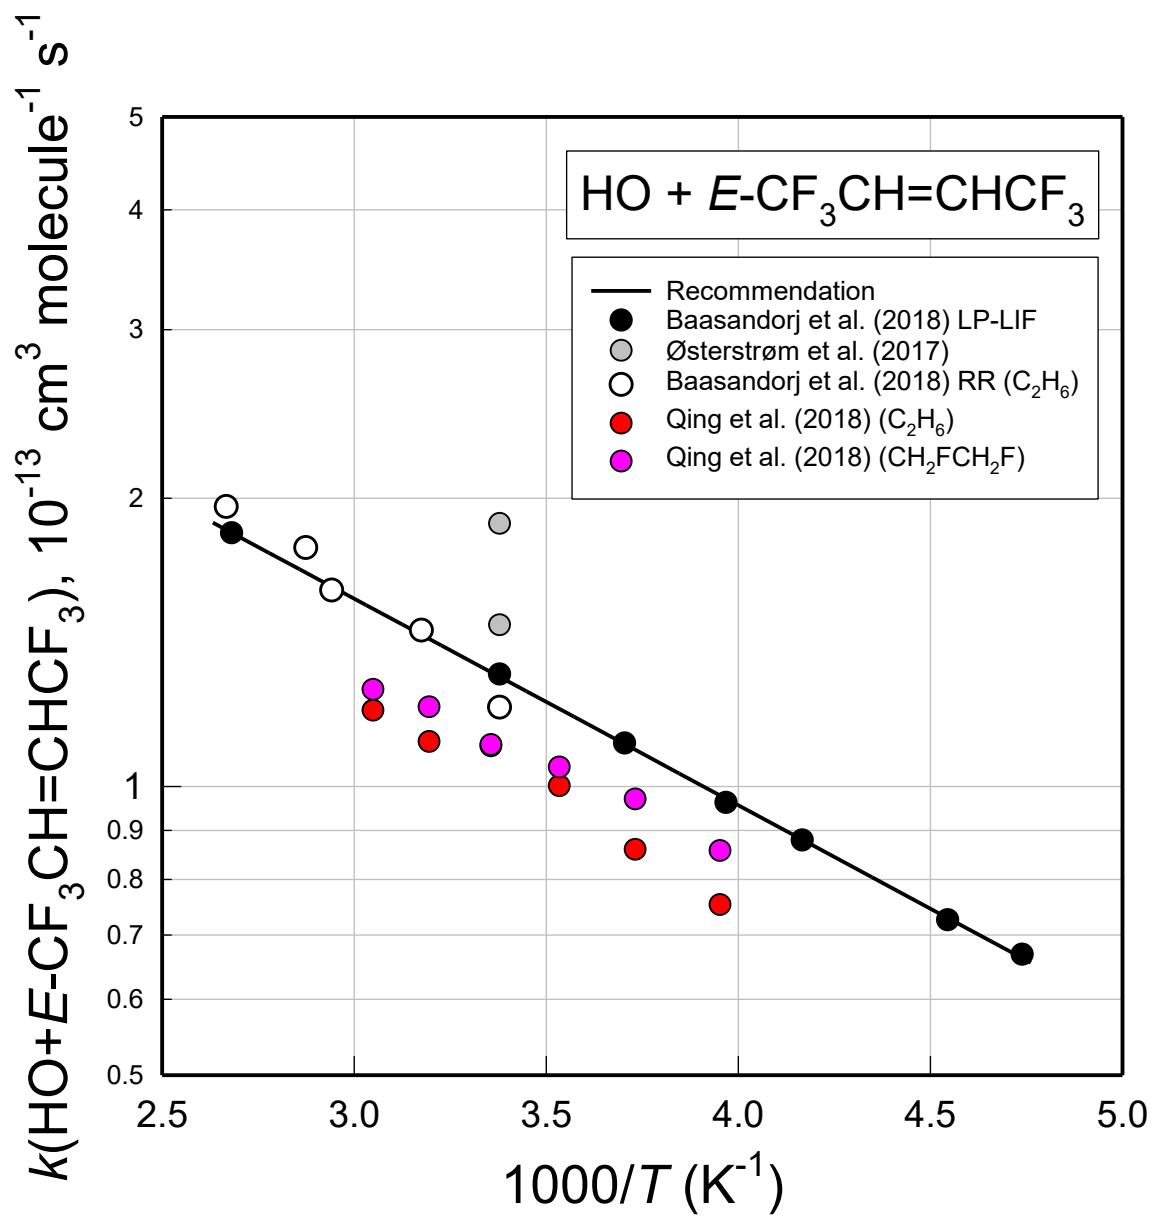

1974  
1975  
1976

1979 **HO + Z-CF<sub>3</sub>CH=CHCF<sub>3</sub> (HFO-1336mzz(Z)) → products**

1980 **Rate coefficient data**

| <i>k</i> /cm <sup>3</sup> molecule <sup>-1</sup> s <sup>-1</sup>                         | Temp./K        | Reference                | Technique/ Comments |
|------------------------------------------------------------------------------------------|----------------|--------------------------|---------------------|
| <i>Absolute Rate Coefficients</i>                                                        |                |                          |                     |
| 5.73 × 10 <sup>-19</sup> T <sup>2</sup> exp(-678/T)<br>(4.91 ± 0.50) × 10 <sup>-13</sup> | 212-374<br>296 | Baasandorj et al. (2011) | LP-LIF (a)          |
| <i>Relative Rate Coefficients</i>                                                        |                |                          |                     |
| (3.99 ± 0.63) × 10 <sup>-13</sup><br>(4.18 ± 0.42) × 10 <sup>-13</sup>                   | 296<br>296     | Østerstrøm et al. (2017) | RR (b)              |
| See comment (c)<br>(4.94 ± 0.09) × 10 <sup>-13</sup>                                     | 296-375<br>296 | Baasandorj et al. (2018) | RR (c)              |

1984 **Comments**

- 1985 (a) HO radicals were generated by 248 nm laser photolysis of H<sub>2</sub>O<sub>2</sub> or (CH<sub>3</sub>)<sub>3</sub>COOH in 2.5-200 Torr  
 1986 of He or N<sub>2</sub>. There was no discernible effect of pressure or diluent gas on the rate coefficient.  
 1987 (b) HO radicals were generated by the photolysis of (CH<sub>3</sub>)<sub>2</sub>CHONO or CH<sub>3</sub>ONO in 700 Torr air/N<sub>2</sub>/O<sub>2</sub>  
 1988 in the presence of NO. The loss of Z-CF<sub>3</sub>CH=CHCF<sub>3</sub> was monitored relative to C<sub>3</sub>H<sub>8</sub> and C<sub>2</sub>H<sub>6</sub> using  
 1989 FTIR spectroscopy. Rate coefficient ratios of  $k(\text{Z-CF}_3\text{CH=CHCF}_3)/k(\text{C}_3\text{H}_8) = 0.38 \pm 0.06$  and  $k(\text{Z-}$   
 1990  $\text{CF}_3\text{CH=CHCF}_3)/k(\text{C}_2\text{H}_6) = 1.78 \pm 0.18$  were measured. Using  $k(\text{HO} + \text{C}_3\text{H}_8) = 1.05 \times 10^{-12}$  cm<sup>3</sup>  
 1991 molecule<sup>-1</sup> s<sup>-1</sup> and  $k(\text{HO} + \text{C}_2\text{H}_6) = 2.35 \times 10^{-13}$  cm<sup>3</sup> molecule<sup>-1</sup> s<sup>-1</sup> (Atkinson et al., 2006) at 296 K  
 1992 gives  $k(\text{HO} + \text{Z-CF}_3\text{CH=CHCF}_3) = (3.99 \pm 0.63) \times 10^{-13}$  and  $(4.18 \pm 0.42) \times 10^{-13}$  cm<sup>3</sup> molecule<sup>-1</sup> s<sup>-1</sup>.  
 1993 (c) HO radicals were generated by the 248 nm pulsed laser photolysis of O<sub>3</sub> in the presence of H<sub>2</sub>O in  
 1994 100-200 Torr of He at 296-375 K. The loss of Z-CF<sub>3</sub>CH=CHCF<sub>3</sub> was monitored relative to that of  
 1995 C<sub>2</sub>H<sub>6</sub> by FTIR spectroscopy. At 296, 345, and 375 K rate coefficient ratios of  $k(\text{Z-}$   
 1996  $\text{CF}_3\text{CH=CHCF}_3)/k(\text{C}_2\text{H}_6) = 2.10 \pm 0.04$ ,  $1.24 \pm 0.02$ , and  $1.02 \pm 0.02$  were measured. Using  $k(\text{C}_2\text{H}_6) =$   
 1997  $6.9 \times 10^{-13} \exp(-1000/T)$  cm<sup>3</sup> molecule<sup>-1</sup> s<sup>-1</sup> (IUPAC, 2024) gives  $k(\text{Z-CF}_3\text{CH=CHCF}_3) = (4.94 \pm 0.09)$ ,  
 1998  $(4.71 \pm 0.08)$ , and  $(4.89 \pm 0.10) \times 10^{-13}$  cm<sup>3</sup> molecule<sup>-1</sup> s<sup>-1</sup> at 296, 345, and 375 K, respectively.  
 1999  
 2000  
 2001  
 2002  
 2003

2004 **Preferred Values**

| Parameter                                                        | Value                               | T/K     |
|------------------------------------------------------------------|-------------------------------------|---------|
| <i>k</i> /cm <sup>3</sup> molecule <sup>-1</sup> s <sup>-1</sup> | 4.80 × 10 <sup>-13</sup>            | 298     |
| <i>k</i> /cm <sup>3</sup> molecule <sup>-1</sup> s <sup>-1</sup> | 2.46 × 10 <sup>-13</sup> exp(199/T) | 210-300 |
| <i>Reliability</i>                                               |                                     |         |
| Δ log <i>k</i>                                                   | ± 0.06                              | 298     |
| Δ E/R                                                            | ± 100                               | 210-300 |

2005 *Comments on Preferred Values*

2010 There rate coefficients measured in the absolute and relative rate studies by Baasandorj et al. (2011)  
 2011 and the relative rate study by Østerstrøm et al. (2017) are consistent. Distinct curvature in the  
 2012 Arrhenius plot is evident over temperature range studied by Baasandorj et al. (2011) and the data are  
 2013 well described by the modified Arrhenius expression  $k = (5.73 \pm 0.60) \times 10^{-19} T^2 \exp(-(678 \pm 10)/T) \text{ cm}^3$   
 2014  $\text{molecule}^{-1} \text{ s}^{-1}$ . A fit of the Arrhenius expression to the absolute rate data from Baasandorj et al. (2011)  
 2015 below 300 K gives  $k = 2.46 \times 10^{-13} \exp(199/T)$  which gives  $k = 4.80 \times 10^{-13} \text{ cm}^3 \text{ molecule}^{-1} \text{ s}^{-1}$  at 298  
 2016 K. For simplicity and consistency within the IUPAC database we prefer the simple Arrhenius  
 2017 expression.

## 2020 References

- 2022 Atkinson, R., Baulch, D. L., Cox, R. A., Crowley, J. N., Hampson, R. F., Hynes, R. G., Jenkin, M. E.,  
 2023 Rossi, M. J., and Troe, J.: Atmos. Chem. Phys., 6, 3625, 2006; IUPAC Task Group on  
 2024 Atmospheric Chemical Kinetic Data Evaluation, <https://iupac.aeris-data.fr/>  
 2025 Baasandorj, M., Marshall, P., Waterland, R. L., Ravishankara, A. R., and Burkholder, J. B.: J. Phys. Chem.  
 2026 A, 122, 4635-4646, 2018.  
 2027 Østerstrøm, F. F., Andersen, S. T., Sølling, T. I., Nielsen, O. J., and Sulbæk Andersen, M. P.: Phys.  
 2028 Chem. Chem. Phys. 19, 735–750, 2017.  
 2029

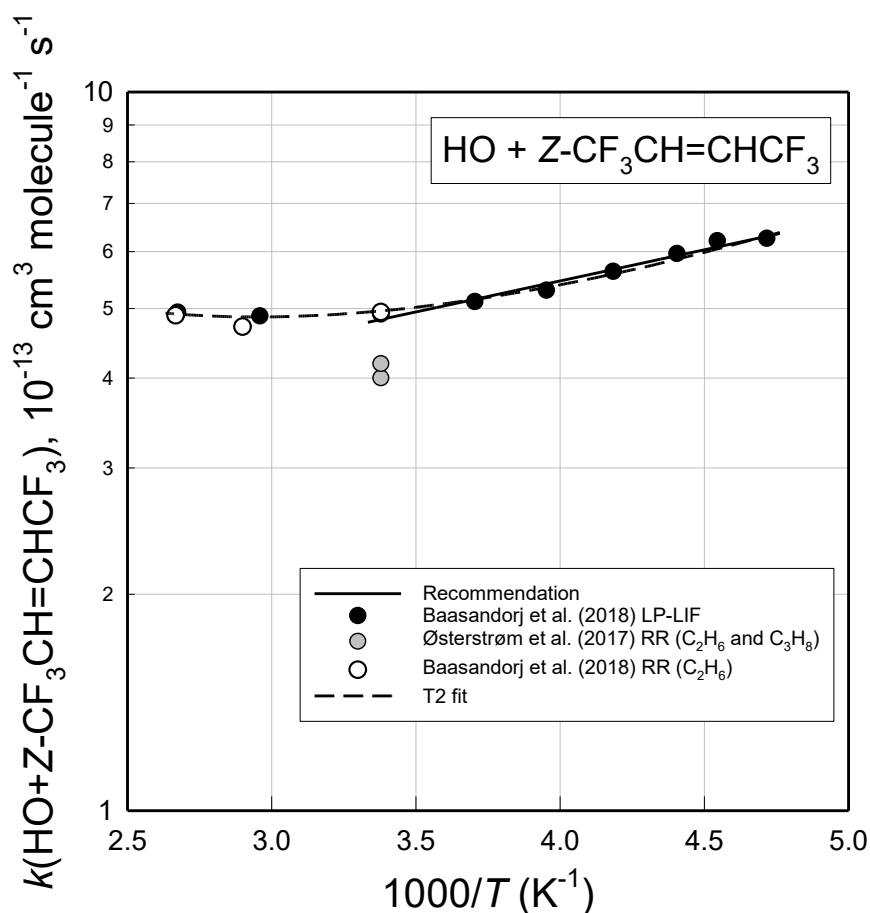

2030  
 2031  
 2032  
 2033

2034 **oClOx95: HO + CH<sub>2</sub>=CHCl**  
 2035 Last evaluated: June 2025; Last change in preferred values: June 2017.

2036 **HO + CH<sub>2</sub>=CHCl → products**

2037 **Rate coefficient data**

| <i>k</i> /cm <sup>3</sup> molecule <sup>-1</sup> s <sup>-1</sup>             | Temp./K         | Reference           | Technique/ Comments |
|------------------------------------------------------------------------------|-----------------|---------------------|---------------------|
| <i>Absolute Rate Coefficients</i>                                            |                 |                     |                     |
| (2–5) × 10 <sup>-12</sup>                                                    | 296             | Howard (1977)       | DF-LMR (a)          |
| 1.14 × 10 <sup>-12</sup> exp[(526±151)/T]<br>(6.60±0.66) × 10 <sup>-12</sup> | 299-422<br>299  | Perry et al. (1977) | FP-RF (b)           |
| 2.14 × 10 <sup>-12</sup> exp[(700±120)/T]<br>7.55 × 10 <sup>-12</sup>        | 313-1173<br>313 | Liu et al. (1989)   | PR-RA (c)           |
| 2.72 × 10 <sup>-12</sup> exp[(335±42)/T]<br>(8.49±0.40) × 10 <sup>-12</sup>  | 293-730<br>293  | Yamada et al., 2001 | LP-LIF (d)          |

2041 **Comments**

- 2042
- 2043
- 2044 (a) HO radicals were produced by the reaction of H atoms with NO<sub>2</sub> in 0.7-7.0 Torr (0.9-9.3 mbar) of  
 2045 helium. The rate coefficient was dependent on total pressure increasing from approximately 2 ×  
 2046 10<sup>-12</sup> to 5 × 10<sup>-12</sup> cm<sup>3</sup> molecule<sup>-1</sup> s<sup>-1</sup> over the total pressure range 0.7-7.0 Torr.
- 2047 (b) Flash photolysis of H<sub>2</sub>O in 50 or 100 Torr of argon was used as a source of HO radicals. The  
 2048 decay of HO radicals was monitored using resonance fluorescence. There was no discernable  
 2049 effect (<5%) of total pressure over the range studied.
- 2050 (c) Pulse radiolysis of one atmosphere of argon containing approximately 6 Torr of water vapor was  
 2051 used as a source of HO radicals. Resonance absorption at 308 nm was used to monitor the decay  
 2052 of HO radicals in the presence of vinyl chloride. It was deduced that the predominant reaction  
 2053 channel changes from an addition-initiated reaction at temperatures below 588 K to a hydrogen  
 2054 abstraction reaction for temperatures above 723 K. The rate coefficient for the addition reaction  
 2055 was described by the Arrhenius expression  $k = 2.14 \times 10^{-12} \exp[(700 \pm 120)/T]$  while that for the  
 2056 H-abstraction reaction was described by  $k = 2.98 \times 10^{-11} \exp[-(4020 \pm 700)/T]$  cm<sup>3</sup> molecule<sup>-1</sup> s<sup>-1</sup>.
- 2057 (d) Photolysis of HONO at 351 nm in 740 Torr of helium was used as a source of HO radicals.

2058 **Preferred Values**

| Parameter                                                        | Value                               | T/K     |
|------------------------------------------------------------------|-------------------------------------|---------|
| <i>k</i> /cm <sup>3</sup> molecule <sup>-1</sup> s <sup>-1</sup> | 7.55 × 10 <sup>-12</sup>            | 298     |
| <i>k</i> /cm <sup>3</sup> molecule <sup>-1</sup> s <sup>-1</sup> | 2.54 × 10 <sup>-12</sup> exp(325/T) | 280-600 |
| <i>Reliability</i>                                               |                                     |         |
| Δ log <i>k</i>                                                   | ± 0.08                              | 298     |
| Δ E/R                                                            | ± 100                               | 280-600 |

2065

2066 Howard (1976) showed that at pressures below 7 Torr of helium the rate of the reaction decreases with  
 2067 total pressure. Perry et al. (1977) reported that at total pressures of 50 Torr of argon and above there is no  
 2068 discernable effect of pressure on the measured rate coefficient. The rate coefficients reported by Perry et  
 2069 al. (1977), Liu et al. (1989), and Yamada et al. (2001) near 298 K measured at, or near, the high pressure  
 2070 limit are in reasonable agreement and an average of these gives the preferred value at 298 K. The  
 2071 preferred Arrhenius expression is derived from a fit to the data obtained below 600 K by Perry et al.  
 2072 (1977), Liu et al. (1989), and Yamada et al. (2001) with the pre-exponential factor adjusted to give the  
 2073 preferred rate coefficient at 298 K. The preferred expression describes the high-pressure limiting rate  
 2074 coefficient which is appropriate for atmospheric conditions.

2075 The reaction proceeds via addition of HO to the >C=C< double bond to give HOCH<sub>2</sub>CHCl and  
 2076 CH<sub>2</sub>CHClOH radicals with the former expected to predominate. Elimination of a Cl atom from the  
 2077 CH<sub>2</sub>CHClOH radical will give the enol CH<sub>2</sub>=CHOH. Addition of O<sub>2</sub> followed by reaction with NO is  
 2078 expected to give a variety of products including HOCH<sub>2</sub>CHO, HCHO, and HC(O)Cl.

2079

2080

2081

### References

2082 Howard, C. J.: *J. Chem. Phys.*, 65, 4771, 1976.

2083 Liu, A., Mulac, W. A., and Jonah, C. D., *J. Phys. Chem.*, 93, 4092, 1989.

2084 Perry, R. A., Atkinson, R., and Pitts, J. N., Jr., *J. Chem. Phys.*, 67, 458, 1977.

2085 Yamada, T., Siraj, M., Taylor, P. H., Peng, J., Hu, X., and Marshall, P., *J. Phys. Chem. A*, 105, 9436,  
 2086 2001.

2087

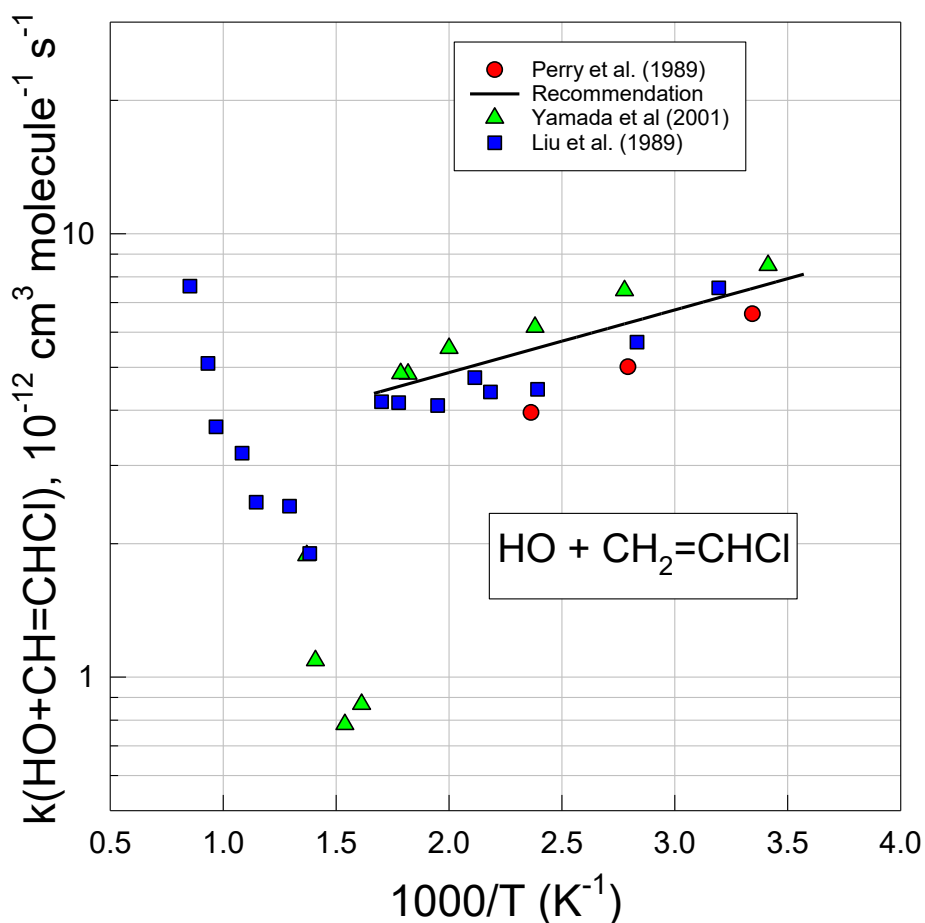

2088

2089

2092

2093

2094

2095

2096

**HO + E-CF<sub>3</sub>CH=CHCl (HCFO-1233zd(E)) → products****Rate coefficient data**

| <i>k</i> /cm <sup>3</sup> molecule <sup>-1</sup> s <sup>-1</sup> | Temp./K | Reference              | Technique/ Comments |
|------------------------------------------------------------------|---------|------------------------|---------------------|
| <i>Absolute Rate Coefficients</i>                                |         |                        |                     |
| 1.025 × 10 <sup>-13</sup> (T/298) <sup>2.29</sup> exp(384/T)     | 220-370 | Orkin et al. (2014)    | FP-RF (a)           |
| (3.29 ± 0.10) × 10 <sup>-13</sup>                                | 298     |                        |                     |
| 1.14 × 10 <sup>-12</sup> exp[(-330±10)/T]                        | 213-376 | Gierczak et al. (2014) | PLP-LIF (b)         |
| (3.76 ± 0.06) × 10 <sup>-13</sup>                                | 296     |                        |                     |
| <i>Relative Rate Coefficients</i>                                |         |                        |                     |
| (3.30 ± 0.30) × 10 <sup>-13</sup>                                | 296     | Andersen et al. (2015) | RR (c)              |
| (3.21 ± 0.25) × 10 <sup>-13</sup>                                | 296     |                        |                     |

2097

2098

2099

**Comments**

- (a) HO radicals were produced by the pulsed photolysis of H<sub>2</sub>O by a xenon flash lamp in 100 Torr (133 mbar) of argon diluent.
- (b) HO radicals were generated by the photolysis of H<sub>2</sub>O<sub>2</sub>, HNO<sub>3</sub>, or (CH<sub>3</sub>)<sub>3</sub>COOH in 25-100 Torr (33-133 mbar) of helium or nitrogen diluent gas. There was no discernable effect of diluent gas or total pressure over the range studied.
- (c) HO radicals were generated by the photolysis of CH<sub>3</sub>ONO in 700 Torr (933 mbar) of air. The loss of E-CF<sub>3</sub>CH=CHCl was monitored relative to those of C<sub>2</sub>H<sub>4</sub> and C<sub>2</sub>H<sub>2</sub>. In the initial work by Sulbaek Andersen et al. (2008) the loss of E-CF<sub>3</sub>CH=CHCl via reaction with Cl atoms produced during the oxidation of E-CF<sub>3</sub>CH=CHCl was not recognized. In a subsequent reanalysis by Andersen et al. (2015) corrections for such loss were computed and applied which resulted in rate coefficient ratios of  $k(E-CF_3CH=CHCl)/k(C_2H_4) = 0.042 \pm 0.004$  and  $k(E-CF_3CH=CHCl)/k(C_2H_2) = 0.430 \pm 0.034$ . Using  $k(HO + C_2H_4) = 7.85 \times 10^{-12}$  and  $k(HO + C_2H_2) = 7.47 \times 10^{-13}$  (Atkinson et al., 2006) gives  $k(E-CF_3CH=CHCl) = (3.30 \pm 0.30) \times 10^{-13}$  and  $(3.21 \pm 0.25) \times 10^{-13}$  cm<sup>3</sup> molecule<sup>-1</sup> s<sup>-1</sup>.

2100

2101

2102

2103

2104

2105

2106

2107

2108

2109

2110

2111

2112

2113

2114

2115

2116

**Preferred Values**

| Parameter                                                        | Value                                | T/K     |
|------------------------------------------------------------------|--------------------------------------|---------|
| <i>k</i> /cm <sup>3</sup> molecule <sup>-1</sup> s <sup>-1</sup> | 3.53 × 10 <sup>-13</sup>             | 298     |
| <i>k</i> /cm <sup>3</sup> molecule <sup>-1</sup> s <sup>-1</sup> | 8.79 × 10 <sup>-13</sup> exp(-272/T) | 220-300 |
| <i>Reliability</i>                                               |                                      |         |
| Δ log <i>k</i>                                                   | ± 0.06                               | 298     |
| Δ E/R                                                            | ± 100                                | 220-300 |

2117

2118

2119

*Comments on Preferred Values*

2120

2121

2122

There is good agreement in the room temperature rate coefficients reported in the absolute rate studies by Orkin et al. (2014) and Gierczak et al. (2014) and the relative rate study by Andersen et al. (2015). The preferred value at 298 K is an average from Orkin et al. (2014) and Gierczak et al. (2014). There

2123 is evidence in the combined data set from Orkin et al. (2014) and Gierczak et al. (2014) for a slight  
 2124 curvature in the Arrhenius plot. Fitting the three parameter equation,  $k = CT^2 \exp(-D/T)$  to the data  
 2125 from Orkin et al. (2014) and Gierczak et al. (2014) gives  $k(\text{HO} + E\text{-CF}_3\text{CH}=\text{CHCl}) = 1.70 \times 10^{-18} T^2$   
 2126  $\exp(248/T) \text{ cm}^3 \text{ molecule}^{-1} \text{ s}^{-1}$  over the temperature range 220-380 K. The preferred Arrhenius  
 2127 expression,  $k = A \exp(-B/T)$ , is centered at 260 K and is derived from the three-parameter equation with  $A$   
 2128  $= C e^2 T^2$  and  $B = D + 2T$  with the pre-exponential factor adjusted to reproduce the preferred  $k(298\text{K})$   
 2129 value,  $k(\text{HO} + E\text{-CF}_3\text{CH}=\text{CHCl}) = 8.79 \times 10^{-13} \exp(-272/T) \text{ cm}^3 \text{ molecule}^{-1} \text{ s}^{-1}$ .

## 2130 References

- 2133 Andersen, L. L., Østerstrøm, F.F., Sulbaek Andersen, M. P., Nielsen, O. J., and Wallington, T.J.:  
 2134 Chem. Phys. Lett., 639, 289, 2015.  
 2135 Atkinson, R., Baulch, D. L., Cox, R. A., Crowley, J. N., Hampson, R. F., Hynes, R. G., Jenkin, M.  
 2136 E., Rossi, M. J., and Troe, J.: Atmos. Chem. Phys., 6, 3625, 2006; IUPAC Task Group on  
 2137 Atmospheric Chemical Kinetic Data Evaluation, <https://iupac.aeris-data.fr/>  
 2138 Gierczak, T., Baasandorj, M., and Burkholder, J. B.: J. Phys. Chem. A, 118, 11015, 2014.  
 2139 Orkin, V. L., Martynova, L. E., and Kurylo, M. J.: J. Phys. Chem. A, 118, 5263, 2014.  
 2140 Sulbaek Andersen, M. P., Nilsson, E. J. K., Nielsen, O. J., Johnson, M. S., Hurley, M. D., and  
 2141 Wallington, T. J.: J. Photochem. and Photobiol. A: Chem., 199, 92, 2008.  
 2142 Sulbaek Andersen, M. P., Sølling, T. I., Andersen, L. L., Volkova, A., Hovanesian, D., Britzman,  
 2143 C., Nielsen, O. J., and Wallington, T. J.: Phys. Chem. Chem. Phys., 44, 27949, 2018.  
 2144

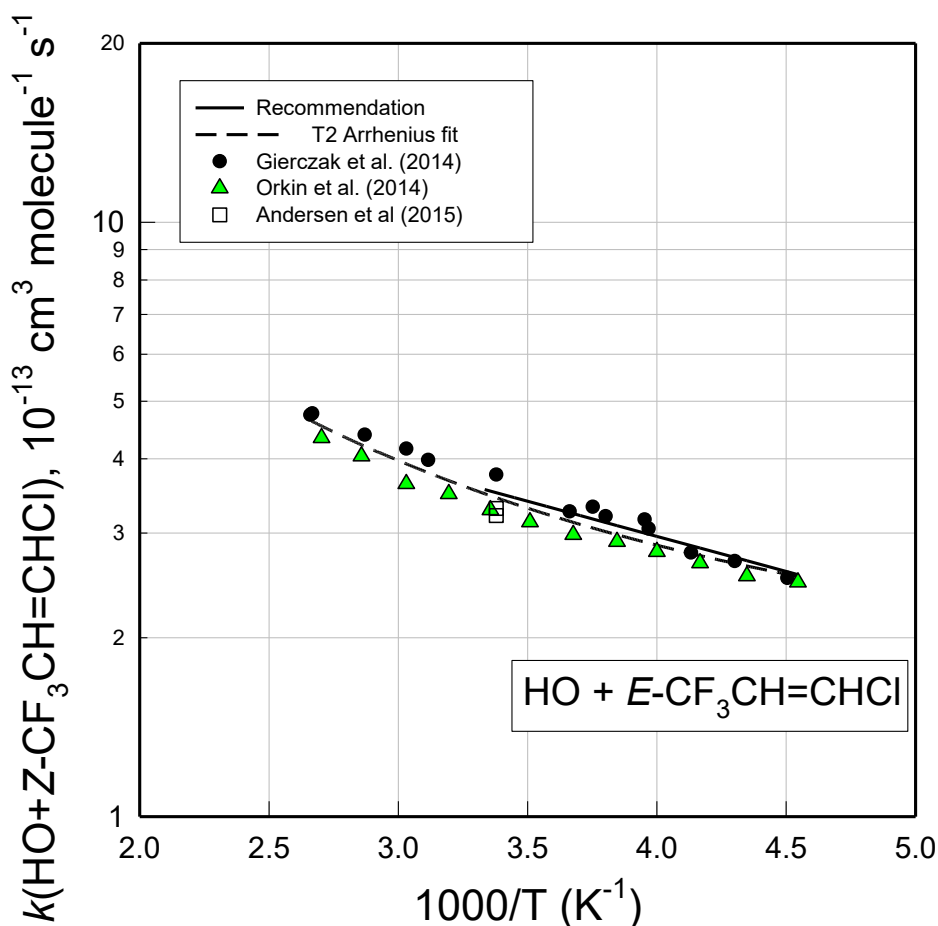

2145  
 2146

2149

2150

2151

2152

2153

**HO + Z-CF<sub>3</sub>CH=CHCl (HCFO-1233zd(Z)) → products****Rate coefficient data**

| <i>k</i> /cm <sup>3</sup> molecule <sup>-1</sup> s <sup>-1</sup> | Temp./K | Reference              | Technique/ Comments |
|------------------------------------------------------------------|---------|------------------------|---------------------|
| <i>Absolute Rate Coefficients</i>                                |         |                        |                     |
| $7.22 \times 10^{-19} T^2 \exp[(800)/T]$                         | 213-376 | Gierczak et al. (2014) | PLP-LIF (a)         |
| $(9.46 \pm 0.22) \times 10^{-13}$                                | 296     |                        |                     |
| <i>Relative Rate Coefficients</i>                                |         |                        |                     |
| $(8.09 \pm 1.10) \times 10^{-13}$                                | 296     | Andersen et al. (2015) | RR (b)              |
| $(7.17 \pm 0.61) \times 10^{-13}$                                | 296     |                        |                     |

2154

2155

2156

**Comments**

(a) HO radicals were generated by the photolysis of H<sub>2</sub>O<sub>2</sub>, HNO<sub>3</sub>, or (CH<sub>3</sub>)<sub>3</sub>COOH in 25-100 Torr (33-133 mbar) of helium or nitrogen diluent. There was no discernable effect of diluent gas or total pressure over the range studied.

(b) HO radicals were generated by the photolysis of CH<sub>3</sub>ONO in 700 Torr (933 mbar) of air. The loss of Z-CF<sub>3</sub>CH=CHCl was monitored relative to C<sub>2</sub>H<sub>4</sub> and C<sub>2</sub>H<sub>2</sub>. Corrections for the loss of Z-CF<sub>3</sub>CH=CHCl via reaction with Cl atoms produced during the oxidation of Z-CF<sub>3</sub>CH=CHCl were computed and applied. Rate coefficient ratios of  $k(\text{Z-CF}_3\text{CH=CHCl})/k(\text{C}_2\text{H}_4) = 0.103 \pm 0.014$  and  $k(\text{Z-CF}_3\text{CH=CHCl})/k(\text{C}_2\text{H}_2) = 0.960 \pm 0.082$  were reported. Using  $k(\text{HO} + \text{C}_2\text{H}_4) = 7.85 \times 10^{-12}$  and  $k(\text{HO} + \text{C}_2\text{H}_2) = 7.47 \times 10^{-13}$  (Atkinson et al., 2006) gives  $k(\text{Z-CF}_3\text{CH=CHCl}) = (8.09 \pm 1.10) \times 10^{-13}$  and  $(7.17 \pm 0.61) \times 10^{-13}$  cm<sup>3</sup> molecule<sup>-1</sup> s<sup>-1</sup>.

2168

2169

2170

**Preferred Values**

| Parameter                                            | Value                              | T/K     |
|------------------------------------------------------|------------------------------------|---------|
| $k/\text{cm}^3 \text{ molecule}^{-1} \text{ s}^{-1}$ | $9.24 \times 10^{-13}$             | 298     |
| $k/\text{cm}^3 \text{ molecule}^{-1} \text{ s}^{-1}$ | $3.61 \times 10^{-13} \exp(280/T)$ | 220-300 |
| <i>Reliability</i>                                   |                                    |         |
| $\Delta \log k$                                      | $\pm 0.06$                         | 298     |
| $\Delta E/R$                                         | $\pm 100$                          | 220-300 |

2171

*Comments on Preferred Values*

2173

The results from the absolute rate study by Gierczak et al. (2014) and relative rate study of Andersen et al. (2015) at 296 K agree within the experimental uncertainties. There is significant curvature in the Arrhenius plot of the results from Gierczak et al. (2014). Gierczak et al. (2014) fitted the three parameter equation,  $k = CT^2 \exp(-D/T)$  to their data giving  $k(\text{HO} + \text{Z-CF}_3\text{CH=CHCl}) = 7.22 \times 10^{-19} T^2 \exp(800/T)$  cm<sup>3</sup> molecule<sup>-1</sup> s<sup>-1</sup>. The preferred Arrhenius expression,  $k = A \exp(-B/T)$ , is centered at 260 K and is derived from the three-parameter equation with  $A = C e^2 T^2$  and  $B = D + 2T$ . Note that the preferred Arrhenius expression,  $k(\text{HO} + \text{CF}_3\text{CH=CHCl}) = 3.61 \times 10^{-13} \exp(280/T)$

2180

2181  $\text{cm}^3 \text{ molecule}^{-1} \text{ s}^{-1}$  should not be used outside the specified temperature range (220-300 K); rather, the  
2182 full three parameter expression should be used.

2183

2184

2185

2186 Andersen, L. L., Østerstrøm, F. F., Sulbaek Andersen, M. P., Nielsen, O. J., and Wallington, T. J.: Chem.  
2187 Phys. Lett., 639, 289, 2015.

2188 Atkinson, R., Baulch, D. L., Cox, R. A., Crowley, J. N., Hampson, R. F., Hynes, R. G., Jenkin, M. E.,  
2189 Rossi, M. J., and Troe, J.: Atmos. Chem. Phys., 6, 3625, 2006; IUPAC Task Group on  
2190 Atmospheric Chemical Kinetic Data Evaluation, <https://iupac.aeris-data.fr/>

2191 Gierczak, T., Baasandorj, M., and Burkholder, J. B.: J. Phys. Chem. A, 118, 11015, 2014.

2192

2193

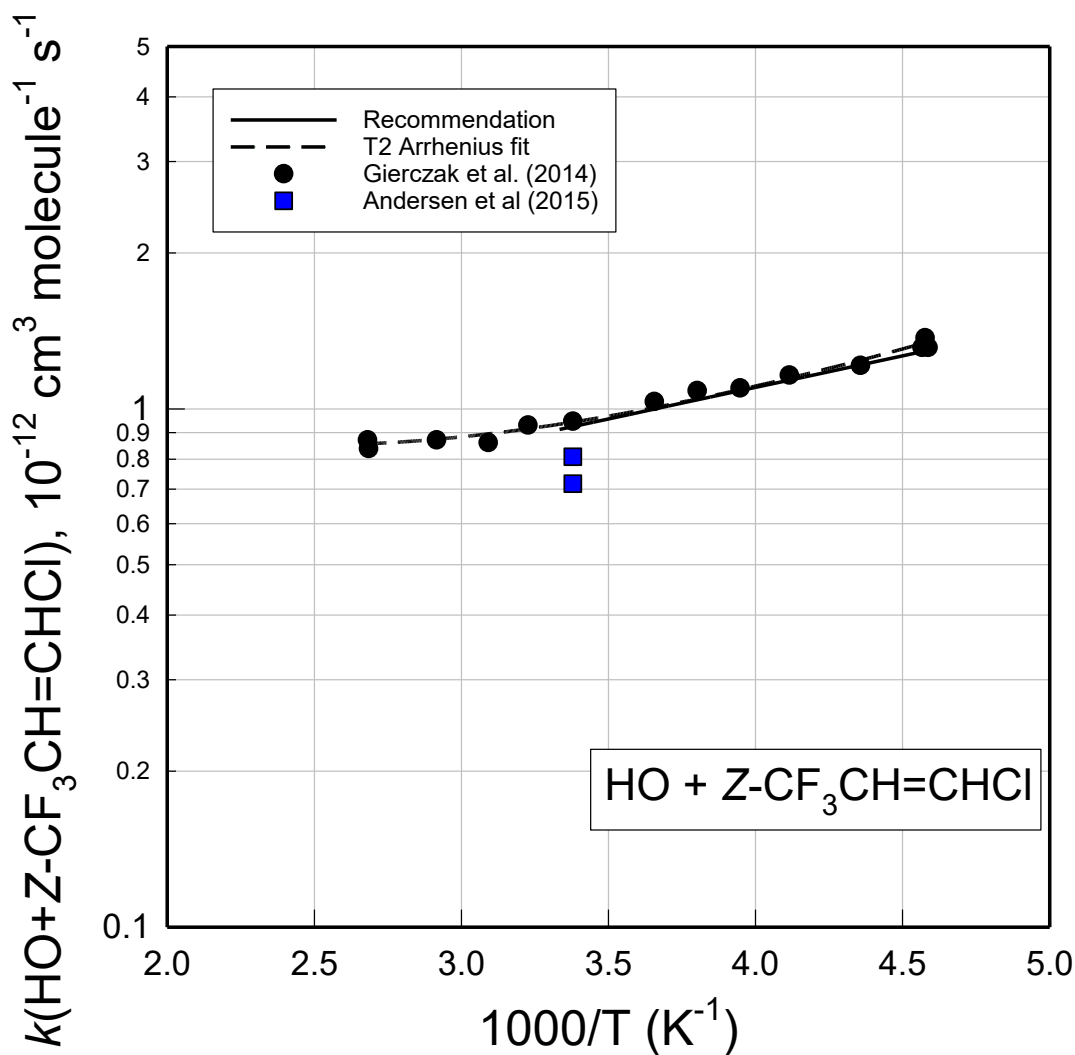

2194

2195

2196 **oFOx165: HO + E-CF<sub>3</sub>CF=CHCl (HCFO-1224yd(E))**  
2197 Last evaluated: June 2025; Last change in preferred values: June 2024.

2198 **HO + E-CF<sub>3</sub>CF=CHCl (HCFO-1224yd(E)) → products**

2200 **Rate coefficient data**

| <i>k</i> /cm <sup>3</sup> molecule <sup>-1</sup> s <sup>-1</sup> | Temp./K | Reference               | Technique/ Comments |
|------------------------------------------------------------------|---------|-------------------------|---------------------|
| <i>Absolute Rate Coefficients</i>                                |         |                         |                     |
| (1.09±0.03) × 10 <sup>-12</sup> exp((50±10)/T)                   | 250-430 | Tokuhashi et al. (2018) | FP, LP-LIF (a)      |
| (1.30 ± 0.01) × 10 <sup>-12</sup>                                | 298     |                         |                     |

2203 **Comments**

2204 (a) HO radicals were generated by either flash photolysis or laser photolysis and were monitored  
2205 using laser induced fluorescence. In the flash photolysis experiments photolysis of water vapor  
2206 using a was employed as the source of HO radicals. In the laser photolysis experiments two  
2207 photolysis of N<sub>2</sub>O using an ArF eximer laser to produce O(<sup>1</sup>D) atoms in the presence of either  
2208 water vapor or CH<sub>4</sub> were used to generate HO radicals. There was no discernible difference in  
2209 results obtained using the different methods. Experiments were performed in 5-200 Torr of argon  
2210 or helium diluent, there was no discernible effect of pressure or diluent gas. The E-CF<sub>3</sub>CF=CHCl  
2211 sample was purified before use and the purity of the purified sample was determined to be 99.4%.

2212 **Preferred Values**

| Parameter                                                        | Value                              | T/K     |
|------------------------------------------------------------------|------------------------------------|---------|
| <i>k</i> /cm <sup>3</sup> molecule <sup>-1</sup> s <sup>-1</sup> | 1.30 × 10 <sup>-12</sup>           | 298     |
| <i>k</i> /cm <sup>3</sup> molecule <sup>-1</sup> s <sup>-1</sup> | 1.09 × 10 <sup>-12</sup> exp(53/T) | 250-430 |
| <i>Reliability</i>                                               |                                    |         |
| Δ log <i>k</i>                                                   | ± 0.08                             | 298     |
| Δ E/R                                                            | ± 100                              | 250-430 |

2218 **Comments on Preferred Values**

2219 The preferred expression,  $k = 1.09 \times 10^{-12} \exp(53/T)$ , is a fit to the results from Tokuhashi et al.  
2220 (2018) which gives  $k = 1.30 \times 10^{-12} \text{ cm}^3 \text{ molecule}^{-1} \text{ s}^{-1}$  at 298 K.

2221 **References**

2222 Tokuhashi, K., Uchimaru, T., Takizawa, K., and Kondo, S.: J. Phys. Chem. A., 122, 3120-3127,  
2223 2018.

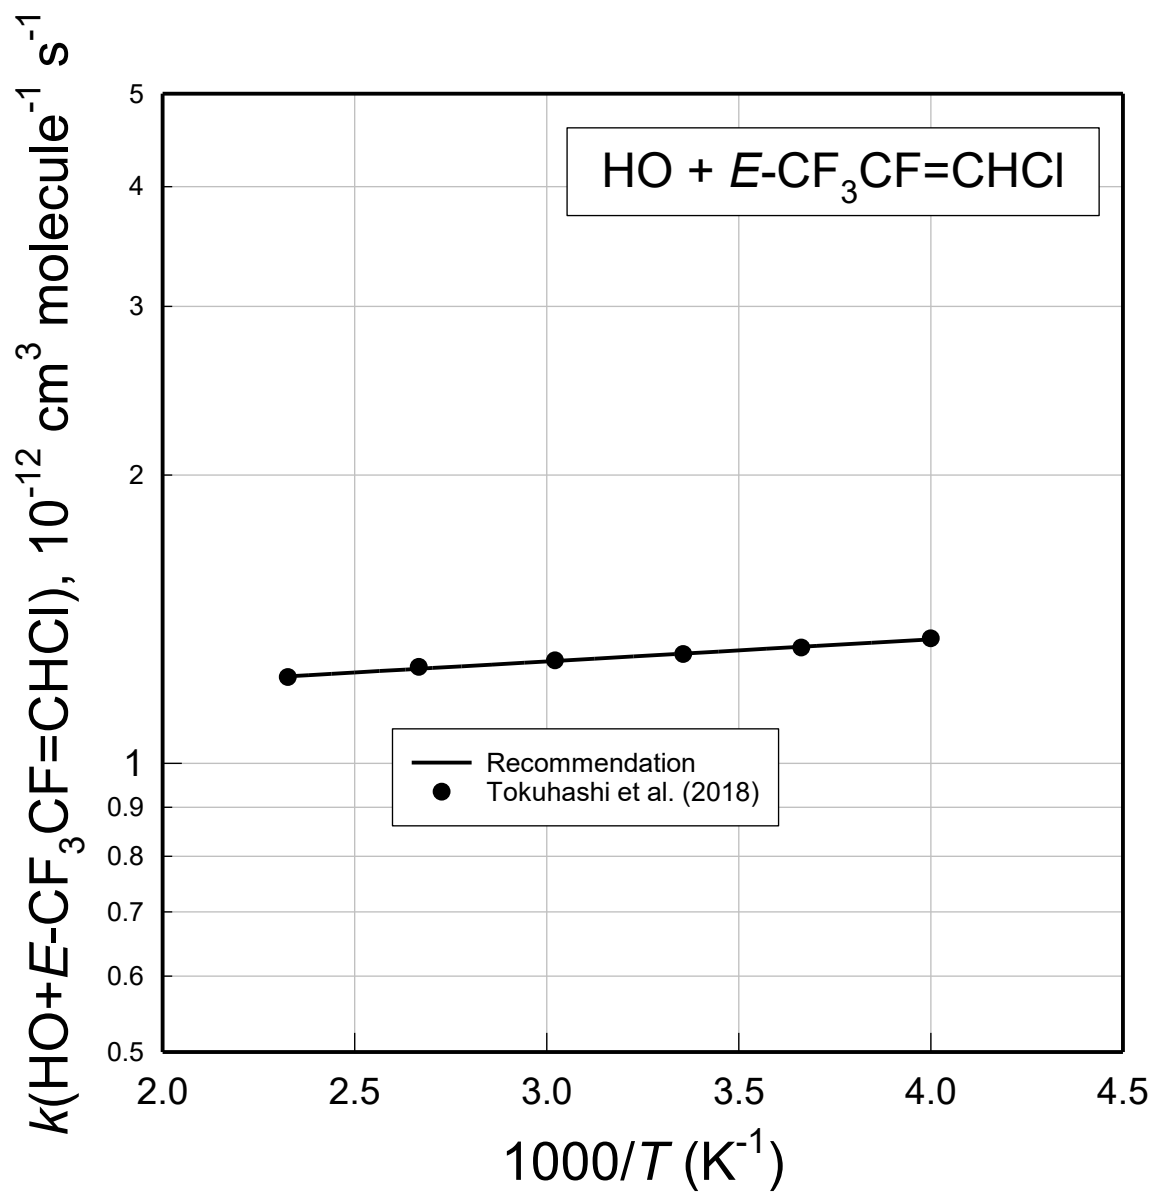

2232  
2233

2234 **oFOx166: HO + Z-CF<sub>3</sub>CF=CHCl (HCFO-1224yd(Z))**  
 2235 Last evaluated: June 2025; Last change in preferred values: June 2024.

2236 **HO + Z-CF<sub>3</sub>CF=CHCl (HCFO-1224yd(Z)) → products**

2237 **Rate coefficient data**

| <i>k</i> /cm <sup>3</sup> molecule <sup>-1</sup> s <sup>-1</sup> | Temp./K | Reference                  | Technique/ Comments |
|------------------------------------------------------------------|---------|----------------------------|---------------------|
| <i>Absolute Rate Coefficients</i>                                |         |                            |                     |
| (8.02±0.19) × 10 <sup>-13</sup> exp(-(100±10)/T)                 | 250-430 | Tokuhashi et al. (2018a,b) | FP, LP-LIF (a)      |
| (5.84 ± 0.03) × 10 <sup>-13</sup>                                | 298     |                            |                     |

2241 **Comments**

2242 (a) HO radicals were generated by either flash photolysis or laser photolysis and were monitored  
 2243 using laser induced fluorescence. In the flash photolysis experiments photolysis of water vapor  
 2244 was employed as the source of HO radicals. In the laser photolysis experiments photolysis of N<sub>2</sub>O  
 2245 to produce O(<sup>1</sup>D) atoms in the presence of either water vapor or CH<sub>4</sub> were used to generate HO  
 2246 radicals. There was no discernible difference in results obtained using the different methods.  
 2247 Experiments were performed in 5-200 Torr of argon or helium diluent, there was no discernible  
 2248 effect of pressure or diluent gas. The Z-CF<sub>3</sub>CF=CHCl sample was purified before use and the  
 2249 purity of the purified sample was determined to be 99.92%.

2252 **Preferred Values**

| Parameter                                                        | Value                                | T/K     |
|------------------------------------------------------------------|--------------------------------------|---------|
| <i>k</i> /cm <sup>3</sup> molecule <sup>-1</sup> s <sup>-1</sup> | 5.83 × 10 <sup>-13</sup>             | 298     |
| <i>k</i> /cm <sup>3</sup> molecule <sup>-1</sup> s <sup>-1</sup> | 8.03 × 10 <sup>-13</sup> exp -(95/T) | 250-430 |
| <i>Reliability</i>                                               |                                      |         |
| Δ log <i>k</i>                                                   | ± 0.08                               | 298     |
| Δ E/R                                                            | ± 100                                | 250-430 |

2256 **Comments on Preferred Values**

2257 The preferred expression,  $k = 8.03 \times 10^{-13} \exp -(95/T)$ , is a fit to the results from Tokuhashi et al.  
 2258 (2018a,b) which gives  $k = 5.83 \times 10^{-13} \text{ cm}^3 \text{ molecule}^{-1} \text{ s}^{-1}$  at 298 K.

2263 **References**

- 2264 Tokuhashi, K., Uchimaru, T., Takizawa, and K., Kondo, S.: J. Phys. Chem. A., 122, 3120-3127,  
 2265 2018a.  
 2266 Tokuhashi, K., Uchimaru, T., Takizawa, K., and Kondo, S.: J. Phys. Chem. A., 122, 9922-9922,  
 2267 2018b.

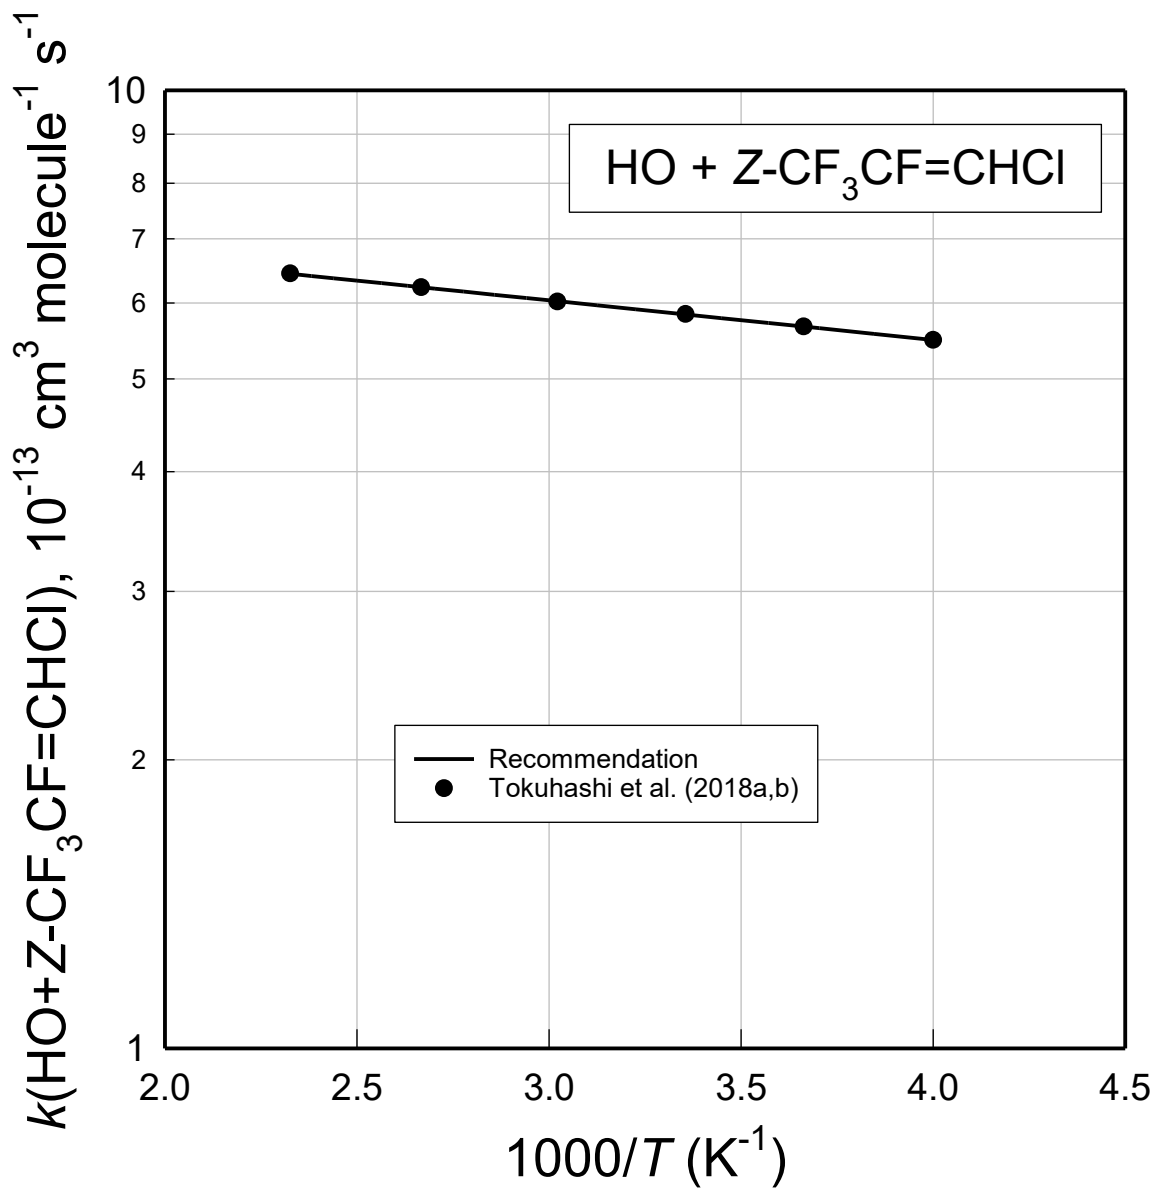

2272  
2273

2276  
2277  
2278  
2279  
2280

**HO + CF<sub>3</sub>CBr=CH<sub>2</sub> (HBFO-1233xfB) → products**

**Rate coefficient data**

| <i>k</i> /cm <sup>3</sup> molecule <sup>-1</sup> s <sup>-1</sup> | Temp./K | Reference                      | Technique/<br>Comments |
|------------------------------------------------------------------|---------|--------------------------------|------------------------|
| <i>Absolute Rate Coefficients</i>                                |         |                                |                        |
| (1.36±0.16) × 10 <sup>-13</sup> exp((317±34)/T)                  | 250-370 | Orkin et al. (2002)            | FP-RF (a)              |
| (3.88 ± 0.15) × 10 <sup>-12</sup>                                | 298     |                                |                        |
| 4.85 × 10 <sup>-13</sup> (T/298) <sup>0.92</sup> exp(613/T)      | 220-370 | Patten et al. (2011)           | FP-RF (b)              |
| (3.79 ± 0.02) × 10 <sup>-12</sup>                                | 298     |                                |                        |
| <i>Relative Rate Coefficients</i>                                |         |                                |                        |
| (3.61±0.28) × 10 <sup>-12</sup>                                  | 296     | Sulbaek Andersen et al. (2009) | RR (c)                 |
| (3.99±0.24) × 10 <sup>-12</sup>                                  | 296     |                                |                        |

2281  
2282  
2283  
2284  
2285  
2286  
2287  
2288  
2289  
2290  
2291  
2292  
2293  
2294  
2295  
2296  
2297

**Comments**

- (a) HO radicals were generated by flash photolysis of water. Experiments were performed in 100 Torr of argon diluent.
- (b) HO radicals were generated by flash photolysis of water. Experiments were performed in 7-30 Torr of argon diluent. There was no discernible effect of pressure suggesting the reaction is at, or near, the high-pressure limit.
- (c) Photolysis of CH<sub>3</sub>ONO in 700 Torr (933 mbar) of air diluent was used to generate HO radicals. The loss of CF<sub>3</sub>CBr=CH<sub>2</sub> was measured relative to C<sub>2</sub>H<sub>2</sub> and C<sub>2</sub>H<sub>4</sub> and used to measure the rate coefficient ratios  $k(\text{CF}_3\text{CBr}=\text{CH}_2)/k(\text{C}_2\text{H}_2) = 4.829 \pm 0.374$  and  $k(\text{CF}_3\text{CBr}=\text{CH}_2)/k(\text{C}_2\text{H}_4) = 0.508 \pm 0.031$ . Using  $k(\text{HO} + \text{C}_2\text{H}_2) = 7.47 \times 10^{-13} \text{ cm}^3 \text{ molecule}^{-1} \text{ s}^{-1}$  and  $k(\text{HO} + \text{C}_2\text{H}_4) = 7.85 \times 10^{-12} \text{ cm}^3 \text{ molecule}^{-1} \text{ s}^{-1}$  (Atkinson et al., 2006) gives  $k(\text{HO} + \text{CF}_3\text{CBr}=\text{CH}_2) = (3.61 \pm 0.28) \times 10^{-12}$  and  $(3.99 \pm 0.24) \times 10^{-12} \text{ cm}^3 \text{ molecule}^{-1} \text{ s}^{-1}$ .

**Preferred Values**

| Parameter                                                        | Value                               | T/K     |
|------------------------------------------------------------------|-------------------------------------|---------|
| <i>k</i> /cm <sup>3</sup> molecule <sup>-1</sup> s <sup>-1</sup> | 3.84 × 10 <sup>-12</sup>            | 298     |
| <i>k</i> /cm <sup>3</sup> molecule <sup>-1</sup> s <sup>-1</sup> | 1.11 × 10 <sup>-12</sup> exp(370/T) | 250-430 |
| <i>Reliability</i>                                               |                                     |         |
| Δ log <i>k</i>                                                   | ± 0.06                              | 298     |
| Δ E/R                                                            | ± 100                               | 250-430 |

2298  
2299  
2300  
2301  
2302  
2303  
2304  
2305

*Comments on Preferred Values*

There is good agreement between the results of the absolute rate studies by Orkin et al. (2002) and Patten et al. (2011) and the relative rate study by Sulbaek Andersen et al. (2009). An average of the results from Orkin et al. (2002) and Patten et al. (2011) gives  $k = 3.84 \times 10^{-12} \text{ cm}^3 \text{ molecule}^{-1} \text{ s}^{-1}$  at 298 K. Patten et al.

2306 (2011) showed that their data and those from Orkin et al. (2002) over the entire temperature range studied  
2307 (220-370 K) are well fit by the expression  $k = 4.85 \times 10^{-13} (T/298)^{0.92} \exp(613/T) \text{ cm}^3 \text{ molecule}^{-1} \text{ s}^{-1}$ . A fit  
2308 of the Arrhenius expression to the combined data set from Orkin et al. (2002) and Patten et al. (2011)  
2309 below 300 K and adjusting the A factor to reproduce the preferred value at 298 K gives  $k = 1.11 \times 10^{-12}$   
2310  $\exp(370/T) \text{ cm}^3 \text{ molecule}^{-1} \text{ s}^{-1}$ . For simplicity and consistency within the IUPAC database we prefer the  
2311 simple Arrhenius expression.

## 2312 References

- 2313 Atkinson, R., Baulch, D.L., Cox, R.A., Crowley, J.N., Hampson, R. F., Hynes, R. G., Jenkin, M. E.,  
2314 Rossi, M. J., and Troe, J.: Atmos. Chem. Phys., 6, 3625, 2006; IUPAC Task Group on Atmospheric  
2315 Chemical Kinetic Data Evaluation, <https://iupac.aeris-data.fr/>  
2316 Orkin, V.L., Louis, F., Huie, R.E., Kurylo, M.J.: J. Phys. Chem. A, 106, 10195-10199, 2002.  
2317 Patten, K.O., Khamaganov, V.G., Orkin, V.L., Baughcum, S.L., Wuebbles, D.J.: J. Geophys. Res. Atmos.  
2318 116, D24307, 2011.  
2319 Sulbaek Andersen, M.P., Hurley, M.D., and Wallington, T.J.: Chem. Phys. Lett., 482, 20-23, 2009.  
2320  
2321  
2322

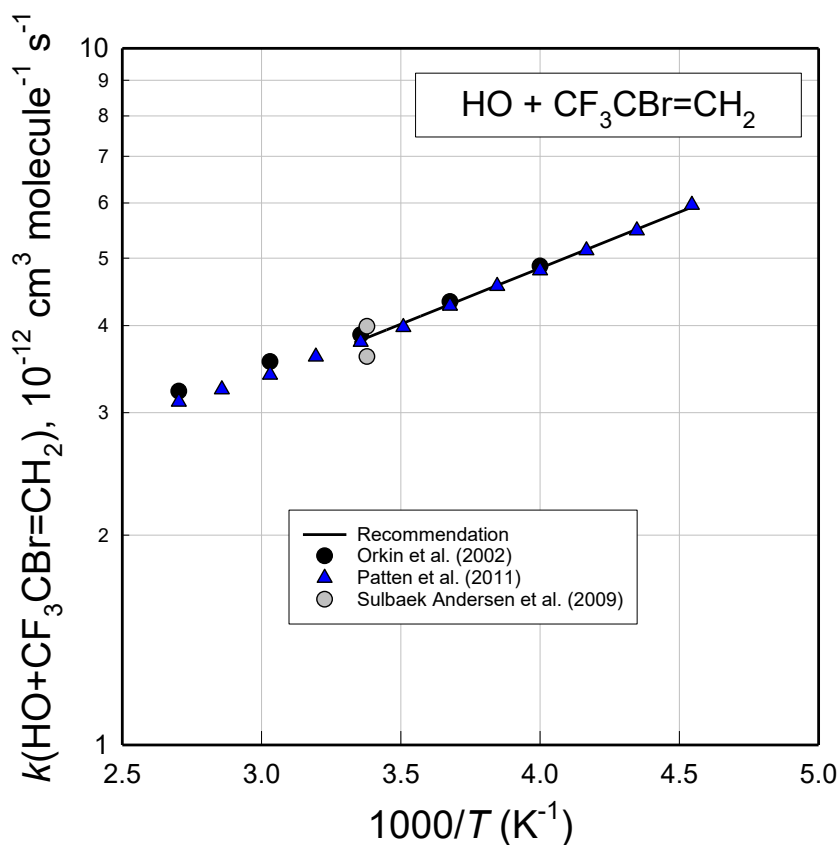

2323  
2324

2325 **oFOx154: NO<sub>3</sub> + CF<sub>2</sub>=CF<sub>2</sub>**  
2326 Last evaluated: June 2025; Last change in preferred values: June 2017.

2327  
2328 **NO<sub>3</sub> + CF<sub>2</sub>=CF<sub>2</sub> → products**

2329  
2330 **Rate coefficient data**

2331

| <i>k</i> /cm <sup>3</sup> molecule <sup>-1</sup> s <sup>-1</sup> | Temp./K | Reference             | Technique/ Comments |
|------------------------------------------------------------------|---------|-----------------------|---------------------|
| <i>Relative Rate Coefficients</i>                                |         |                       |                     |
| < 3 × 10 <sup>-15</sup>                                          | 298     | Acerboni et al., 1999 | RR (a)              |

2332  
2333 **Comments**

2334  
2335 (a) NO<sub>3</sub> radicals were produced by mixing O<sub>3</sub> with an excess of NO<sub>2</sub>, to establish an equilibrium  
2336 between NO<sub>2</sub>, NO<sub>3</sub>, and N<sub>2</sub>O<sub>5</sub> in 740 Torr (986 mbar) of air diluent. The decay of C<sub>2</sub>F<sub>4</sub> was  
2337 monitored relative to that of C<sub>3</sub>H<sub>6</sub> and a rate coefficient ratio  $k(\text{NO}_3 + \text{C}_2\text{F}_4)/k(\text{NO}_3 + \text{C}_3\text{H}_6) =$   
2338  $0.159$  was measured. Using  $k(\text{NO}_3 + \text{C}_3\text{H}_6) = 9.5 \times 10^{-15}$  (Atkinson et al., 2006) gives  $k(\text{NO}_3 +$   
2339  $\text{C}_2\text{F}_4) = 1.5 \times 10^{-15}$  cm<sup>3</sup> molecule<sup>-1</sup> s<sup>-1</sup>. The authors noted a “relatively large random error” in the  
2340 determination of the rate coefficient ratio, although they did not quantify the uncertainty, and  
2341 chose to report an upper limit for  $k(\text{NO}_3 + \text{C}_2\text{F}_4) < 3 \times 10^{-15}$  cm<sup>3</sup> molecule<sup>-1</sup> s<sup>-1</sup>.

2342  
2343 **Preferred Values**

2344

| Parameter                                                        | Value                   | T/K |
|------------------------------------------------------------------|-------------------------|-----|
| <i>k</i> /cm <sup>3</sup> molecule <sup>-1</sup> s <sup>-1</sup> | < 3 × 10 <sup>-15</sup> | 298 |

2345  
2346 *Comments on Preferred Values*

2347  
2348 The upper limit is taken from the study by Acerboni et al. (1999).

2349  
2350 **References**

2351  
2352 Acerboni, G., Jensen, N. R., Rindone, B., and Hjorth, J.: Chem. Phys. Lett., 309, 364, 1999.  
2353 Atkinson, R., Baulch, D. L., Cox, R. A., Crowley, J. N., Hampson, R. F., Hynes, R. G., Jenkin, M. E.,  
2354 Rossi, M. J., and Troe, J.: Atmos. Chem. Phys., 6, 3625, 2006; IUPAC Task Group on  
2355 Atmospheric Chemical Kinetic Data Evaluation, <https://iupac.aeris-data.fr/>.

2356

2357 **oFOx153: NO<sub>3</sub> + CF<sub>3</sub>CF=CH<sub>2</sub> (HFO-1234yf)**  
2358 Last evaluated: June 2025; Last change in preferred values: June 2017.

2359  
2360 **NO<sub>3</sub> + CF<sub>3</sub>CF=CH<sub>2</sub> (HFO-1234yf) → products**

2361  
2362 **Rate coefficient data**

2363

| <i>k</i> /cm <sup>3</sup> molecule <sup>-1</sup> s <sup>-1</sup> | Temp./K | Reference                   | Technique/ Comments |
|------------------------------------------------------------------|---------|-----------------------------|---------------------|
| <i>Absolute Rate Coefficients</i>                                |         |                             |                     |
| < 2 × 10 <sup>-16</sup>                                          | 233-353 | Papadimitriou et al. (2011) | FT-MS (a)           |
| <i>Relative Rate Coefficients</i>                                |         |                             |                     |
| (2.6 ± 0.25) × 10 <sup>-17</sup>                                 | 296     | Papadimitriou et al. (2011) | RR (b)              |

2364  
2365 **Comments**

- 2366
- 2367 (a) NO<sub>3</sub> radicals were produced by thermal decomposition of N<sub>2</sub>O<sub>5</sub> in a 400 K oven attached to a  
2368 low-pressure flow tube reactor. NO<sub>3</sub> radicals were detected using a chemical ionization mass  
2369 spectrometer. Experiments were performed in 2-6 Torr of helium diluent at 233-353 K. The  
2370 addition of CF<sub>3</sub>CF=CH<sub>2</sub> led to a barely discernable, < 2 s<sup>-1</sup>, loss of NO<sub>3</sub> radicals from which an  
2371 upper limit of *k*(NO<sub>3</sub>+CF<sub>3</sub>CF=CH<sub>2</sub>) < 2 × 10<sup>-16</sup> cm<sup>3</sup> molecule<sup>-1</sup> s<sup>-1</sup> was derived.
- 2372 (b) NO<sub>3</sub> radicals were produced by thermal decomposition of N<sub>2</sub>O<sub>5</sub> in 630 Torr (840 mbar) of air  
2373 diluent at 296 K. The decay of CF<sub>3</sub>CF=CH<sub>2</sub> was monitored relative to that of C<sub>2</sub>H<sub>4</sub> and a rate  
2374 coefficient ratio *k*(NO<sub>3</sub> + CF<sub>3</sub>CF=CH<sub>2</sub>)/*k*(NO<sub>3</sub> + C<sub>2</sub>H<sub>4</sub>) = 0.124 ± 0.012 was measured. Using  
2375 *k*(NO<sub>3</sub> + C<sub>3</sub>H<sub>6</sub>) = 2.1 × 10<sup>-16</sup> (Atkinson et al., 2006) gives *k*(NO<sub>3</sub> + CF<sub>3</sub>CF=CH<sub>2</sub>) = (2.6 ± 0.25) ×  
2376 10<sup>-17</sup> cm<sup>3</sup> molecule<sup>-1</sup> s<sup>-1</sup>.

2377  
2378 **Preferred Values**

2379

| Parameter                                                        | Value                   | T/K |
|------------------------------------------------------------------|-------------------------|-----|
| <i>k</i> /cm <sup>3</sup> molecule <sup>-1</sup> s <sup>-1</sup> | 2.6 × 10 <sup>-17</sup> | 298 |
| <i>Reliability</i>                                               |                         |     |
| Δ log <i>k</i>                                                   | 0.15                    | 298 |

2380  
2381 *Comments on Preferred Values*

2382  
2383 The preferred value is based on the sole study of this reaction by Papadimitriou et al. (2011).

2384  
2385 **References**

- 2386  
2387 Atkinson, R., Baulch, D. L., Cox, R. A., Crowley, J. N., Hampson, R. F., Hynes, R. G., Jenkin, M. E.,  
2388 Rossi, M. J., and Troe, J.: Atmos. Chem. Phys., 6, 3625, 2006; IUPAC Task Group on Atmospheric  
2389 Chemical Kinetic Data Evaluation, <https://iupac.aeris-data.fr/>  
2390 Papadimitriou, V. C., Lazarou, Y. G., Talukdar, R. K., and Burkholder, J. B.: J. Phys. Chem. A, 115,  
2391 167, 2011.

2392

2393 **oFOx122: NO<sub>3</sub> + Z-CF<sub>3</sub>CF=CHF (HFO-1225ye(Z))**  
 2394 Last evaluated: June 2025; Last change in preferred values: June 2018.

2395 **NO<sub>3</sub> + Z-CF<sub>3</sub>CF=CHF (HFO-1225ye(Z)) → products**

2396 **Rate coefficient data**

| <i>k</i> /cm <sup>3</sup> molecule <sup>-1</sup> s <sup>-1</sup> | Temp./K | Reference                   | Technique/ Comments |
|------------------------------------------------------------------|---------|-----------------------------|---------------------|
| <i>Absolute Rate Coefficients</i>                                |         |                             |                     |
| < 2 × 10 <sup>-16</sup>                                          | 233-353 | Papadimitriou et al. (2011) | FT-MS (a)           |
| <i>Relative Rate Coefficients</i>                                |         |                             |                     |
| (4.2 ± 0.5) × 10 <sup>-18</sup>                                  | 296     | Papadimitriou et al. (2011) | RR (b)              |

2400 **Comments**

- 2401
- 2402
- 2403 (a) NO<sub>3</sub> radicals were produced by thermal decomposition of N<sub>2</sub>O<sub>5</sub> in a 400 K oven attached to a  
 2404 low-pressure flow tube reactor. NO<sub>3</sub> radicals were detected using a chemical ionization mass  
 2405 spectrometer. Experiments were performed in 2-6 Torr of helium diluent at 233-353 K. The  
 2406 addition of CF<sub>3</sub>CF=CHF led to a barely discernible, < 2 s<sup>-1</sup>, loss of NO<sub>3</sub> radicals from which an  
 2407 upper limit of *k*(NO<sub>3</sub>+CF<sub>3</sub>CF=CHF) < 2 × 10<sup>-16</sup> cm<sup>3</sup> molecule<sup>-1</sup> s<sup>-1</sup> was derived.
- 2408 (b) NO<sub>3</sub> radicals were produced by thermal decomposition of N<sub>2</sub>O<sub>5</sub> in 630 Torr (840 mbar) of air  
 2409 diluent at 296 K. The decay of CF<sub>3</sub>CF=CHF was monitored relative to that of C<sub>2</sub>H<sub>4</sub> and a rate  
 2410 coefficient ratio *k*(NO<sub>3</sub> + CF<sub>3</sub>CF=CHF)/*k*(NO<sub>3</sub> + C<sub>2</sub>H<sub>4</sub>) = 0.019 ± 0.002 was measured. Using  
 2411 *k*(NO<sub>3</sub> + C<sub>3</sub>H<sub>6</sub>) = 2.1 × 10<sup>-16</sup> (Atkinson et al., 2006) gives *k*(NO<sub>3</sub> + CF<sub>3</sub>CF=CHF) = (4.2 ± 0.5) ×  
 2412 10<sup>-18</sup> cm<sup>3</sup> molecule<sup>-1</sup> s<sup>-1</sup>.

2413 **Preferred Values**

| Parameter                                                        | Value                   | T/K |
|------------------------------------------------------------------|-------------------------|-----|
| <i>k</i> /cm <sup>3</sup> molecule <sup>-1</sup> s <sup>-1</sup> | 4.2 × 10 <sup>-18</sup> | 298 |
| <i>Reliability</i>                                               |                         |     |
| Δ log <i>k</i>                                                   | 0.20                    | 298 |

2416 *Comments on Preferred Values*

2417

2418 The preferred value is based on the sole study of this reaction by Papadimitriou et al. (2011).

2421 **References**

- 2422 Atkinson, R., Baulch, D. L., Cox, R. A., Crowley, J. N., Hampson, R. F., Hynes, R. G., Jenkin, M. E.,  
 2423 Rossi, M. J., and Troe, J.: Atmos. Chem. Phys., 6, 3625, 2006; IUPAC Task Group on Atmospheric  
 2424 Chemical Kinetic Data Evaluation, <https://iupac.aeris-data.fr/>.  
 2425 Papadimitriou, V. C., Lazarou, Y. G., Talukdar, R. K., and Burkholder, J. B.: J. Phys. Chem. A, 115,  
 2426 167, 2011.

2430 **oFOx123: NO<sub>3</sub> + CF<sub>3</sub>CF=CF<sub>2</sub> (FO-1216)**  
2431 Last evaluated: June 2025; Last change in preferred values: June 2019.

2432  
2433 **NO<sub>3</sub> + CF<sub>3</sub>CF=CF<sub>2</sub> (FO-1216) → products**

2434  
2435 **Rate coefficient data**

2436

| <i>k</i> /cm <sup>3</sup> molecule <sup>-1</sup> s <sup>-1</sup> | Temp./K | Reference             | Technique/ Comments |
|------------------------------------------------------------------|---------|-----------------------|---------------------|
| <i>Relative Rate Coefficients</i><br>< 3 × 10 <sup>-15</sup>     | 298     | Acerboni et al., 2001 | RR (a)              |

2437  
2438 **Comments**

2439  
2440 (a) NO<sub>3</sub> radicals were produced by mixing O<sub>3</sub> with an excess of NO<sub>2</sub>, to establish an equilibrium  
2441 between NO<sub>2</sub>, NO<sub>3</sub>, and N<sub>2</sub>O<sub>5</sub> in 740 Torr (986 mbar) of air diluent. The authors specify that a  
2442 relative rate method was employed, but do not specify the reference used on rate coefficient ratio  
2443 result. The authors noted that the reaction was very slow and only an upper limit for the rate  
2444 coefficient  $k(\text{NO}_3 + \text{C}_3\text{F}_6) < 3 \times 10^{-15} \text{ cm}^3 \text{ molecule}^{-1} \text{ s}^{-1}$  was derived.

2445  
2446 **Preferred Values**

2447

| <b>Parameter</b>                                                 | <b>Value</b>            | <b>T/K</b> |
|------------------------------------------------------------------|-------------------------|------------|
| <i>k</i> /cm <sup>3</sup> molecule <sup>-1</sup> s <sup>-1</sup> | < 3 × 10 <sup>-15</sup> | 298        |

2448  
2449 *Comments on Preferred Values*

2450  
2451 The preferred value was taken from the study by Acerboni et al. (2001).

2452  
2453 **References**

2454  
2455 Acerboni, G., Beukes, J. A., Jensen, N. R., Hjorth, J., Myhre, G., Nielsen, C. J., and Sundet, J. K. :  
2456 Atmos. Environ., 35, 4113, 2001.

2457

2458 **oFOx155: NO<sub>3</sub> + CF<sub>2</sub>=CFCF=CF<sub>2</sub>**  
 2459 Last evaluated: June 2025; Last change in preferred values: June 2019.

2460 **NO<sub>3</sub> + CF<sub>2</sub>=CFCF=CF<sub>2</sub> → products**

2461 **Rate coefficient data**

| <i>k</i> /cm <sup>3</sup> molecule <sup>-1</sup> s <sup>-1</sup> | Temp./K | Reference             | Technique/ Comments |
|------------------------------------------------------------------|---------|-----------------------|---------------------|
| <i>Relative Rate Coefficients</i>                                |         |                       |                     |
| < 3 × 10 <sup>-15</sup>                                          | 298     | Acerboni et al., 2001 | RR (a)              |
| (1.56 ± 0.16) × 10 <sup>-15</sup>                                | 298     | Chen et al., 2005     | RR (b)              |

2465 **Comments**

- 2466 (a) NO<sub>3</sub> radicals were produced by mixing O<sub>3</sub> with an excess of NO<sub>2</sub>, to establish an equilibrium  
 2467 between NO<sub>2</sub>, NO<sub>3</sub>, and N<sub>2</sub>O<sub>5</sub> in 740 Torr (986 mbar) of air diluent. The authors specify that a  
 2468 relative rate method was employed, but do not specify the reference used or rate coefficient ratio  
 2469 result. The authors noted that the reaction was very slow and only an upper limit for the rate  
 2470 coefficient  $k(\text{NO}_3 + \text{C}_3\text{F}_6) < 3 \times 10^{-15} \text{ cm}^3 \text{ molecule}^{-1} \text{ s}^{-1}$  was derived.  
 2471 (b) NO<sub>3</sub> radicals were produced by the thermal decomposition of N<sub>2</sub>O<sub>5</sub>. The loss of CF<sub>2</sub>=CFCF=CF<sub>2</sub>  
 2472 was monitored relative to that of C<sub>3</sub>H<sub>6</sub> using GC-FID in 720 Torr of air diluent following the  
 2473 addition of N<sub>2</sub>O<sub>5</sub>. A rate coefficient ratio of  $k(\text{NO}_3 + \text{CF}_2=\text{CFCF}=\text{CF}_2)/k(\text{NO}_3 + \text{C}_3\text{H}_6) = 0.164 \pm$   
 2474  $0.017$  was measured. Placing this result on an absolute basis using  $k(\text{NO}_3 + \text{C}_3\text{H}_6) = 9.5 \times 10^{-15}$   
 2475 (Atkinson et al., 2006) gives  $k(\text{NO}_3 + \text{CF}_2=\text{CFCF}=\text{CF}_2) = (1.56 \pm 0.16) \times 10^{-15} \text{ cm}^3 \text{ molecule}^{-1} \text{ s}^{-1}$ .  
 2476  
 2477  
 2478

2479 **Preferred Values**

| Parameter                                                        | Value                    | T/K     |
|------------------------------------------------------------------|--------------------------|---------|
| <i>k</i> /cm <sup>3</sup> molecule <sup>-1</sup> s <sup>-1</sup> | 1.56 × 10 <sup>-15</sup> | 298     |
| <i>Reliability</i>                                               |                          |         |
| Δ log <i>k</i>                                                   | 0.15 ± 0.04              | 298 298 |

2482 **Comments on Preferred Values**

2483 The preferred value was taken from the study by Chen et al. (2005). The upper limit reported by  
 2484 Acerboni et al. (2001) is consistent with the preferred value.

2485 **References**

- 2486 Acerboni, G., Beukes, J. A., Jensen, N. R., Hjorth, J., Myhre, G., Nielsen, C. J., and Sundet, J. K.:  
 2487 Atmos. Environ., 35, 4113, 2001.  
 2488 Atkinson, R., Baulch, D. L., Cox, R. A., Crowley, J. N., Hampson, R. F., Hynes, R. G., Jenkin, M. E.,  
 2489 Rossi, M. J., and Troe, J.: Atmos. Chem. Phys., 6, 3625, 2006; IUPAC Task Group on Atmospheric  
 2490 Chemical Kinetic Data Evaluation, <https://iupac.aeris-data.fr/>.  
 2491 Chen, L., Kutsuna, S., Tokuhashi, K., Uchimaru, T., and Sekiya, A.: Chem. Phys. Lett., 416, 187,  
 2492 2005.

2500 **NO<sub>3</sub> + CH<sub>2</sub>=CHCl → products**

2501 **Rate coefficient data**

| <i>k</i> /cm <sup>3</sup> molecule <sup>-1</sup> s <sup>-1</sup> | Temp./K | Reference                       | Technique/ Comments |
|------------------------------------------------------------------|---------|---------------------------------|---------------------|
| <i>Absolute Rate Coefficients</i>                                |         |                                 |                     |
| (4.26 ± 0.39) × 10 <sup>-16</sup>                                | 295     | Noremsaune et al. (1997)        | DF-Vis (a)          |
| 1.8 × 10 <sup>-13</sup> exp(-1780/T)                             | 266-367 |                                 |                     |
| <i>Relative Rate Coefficients</i>                                |         |                                 |                     |
| (4.37 ± 0.19) × 10 <sup>-16</sup>                                | 298     | Atkinson et al. (1987)          | RR (b)              |
| (1.4 ± 0.9) × 10 <sup>-16</sup>                                  | 296     | Andersson and Ljungström (1989) | RR (c)              |
| (2.6 ± 0.5) × 10 <sup>-16</sup>                                  | 296     | Noremsaune et al. (1995)        | RR (d)              |
| (3.74 ± 0.57) × 10 <sup>-16</sup>                                | 296     | Noremsaune et al. (1997)        | RR (e)              |

2505 **Comments**

- 2506
- 2507
- 2508 (a) NO<sub>3</sub> radicals were produced by the reaction of F atoms with HNO<sub>3</sub> and monitored by absorption at  
 2509 662 nm.
- 2510 (b) NO<sub>3</sub> radicals were produced by the thermal decomposition of N<sub>2</sub>O<sub>5</sub> in 740 Torr (986 mbar) of air at  
 2511 298 K. The loss of CH<sub>2</sub>=CHCl was monitored using GC-FID relative to that of C<sub>2</sub>H<sub>4</sub> and a rate  
 2512 coefficient ratio of  $k(\text{NO}_3 + \text{CH}_2=\text{CHCl})/k(\text{NO}_3 + \text{C}_2\text{H}_4) = 2.08 \pm 0.09$  was measured. Using  $k(\text{NO}_3 +$   
 2513  $\text{C}_2\text{H}_4) = 2.1 \times 10^{-16}$  (Atkinson et al., 2006) gives  $k(\text{NO}_3 + \text{CH}_2=\text{CHCl}) = (4.37 \pm 0.19) \times 10^{-16}$  cm<sup>3</sup>  
 2514 molecule<sup>-1</sup> s<sup>-1</sup>.
- 2515 (c) NO<sub>3</sub> radicals were produced by reacting NO<sub>2</sub> with O<sub>3</sub> in one atmosphere pressure of N<sub>2</sub> to establish  
 2516 an equilibrium between NO<sub>2</sub>, NO<sub>3</sub>, and N<sub>2</sub>O<sub>5</sub> at 296 K. The decay of N<sub>2</sub>O<sub>5</sub> and CH<sub>2</sub>=CHCl was  
 2517 monitored by FTIR spectroscopy. A complex chemical mechanism was used with  $k(\text{NO}_3 +$   
 2518  $\text{CH}_2=\text{CHCl})$  varied to give the best fit of the decay of N<sub>2</sub>O<sub>5</sub> and CH<sub>2</sub>=CHCl. This work is  
 2519 superseded by the studies by Noremsaune et al. (1995, 1997) and not considered further.
- 2520 (d) NO<sub>3</sub> radicals were produced by the thermal decomposition of N<sub>2</sub>O<sub>5</sub> which was synthesized in situ  
 2521 by mixing O<sub>3</sub> with excess NO<sub>2</sub> in 760 Torr (1 bar) of air. Experiments were performed at 295 K and  
 2522 kinetic data were obtained by monitoring the decay of CH<sub>2</sub>=CHCl in the chamber over a period of  
 2523 10-60 minutes and simulating the decay using analytical and numerical methods. The rate  
 2524 coefficient  $k(\text{NO}_3 + \text{CH}_2=\text{CHCl})$  derived in the experiments is dependent on the NO<sub>2</sub> + NO<sub>3</sub> = N<sub>2</sub>O<sub>5</sub>  
 2525 equilibrium constant assumed in the calculations. Unfortunately, it is unclear what equilibrium  
 2526 constant was used. In the paper it is stated several times that the temperature of the experiments was  
 2527 295 K, but it then stated that a value of  $K_{eq} = 3.77 \times 10^{-11}$  cm<sup>3</sup> molecule<sup>-1</sup> at 298 K (Wayne et al.  
 2528 1991) was used to derive  $k(\text{NO}_3 + \text{CH}_2=\text{CHCl})$ .  $K_{eq}$  is very sensitive to temperature and increases  
 2529 from  $2.78 \times 10^{-11}$  to  $4.06 \times 10^{-11}$  cm<sup>3</sup> molecule<sup>-1</sup> over the temperature range 298 to 295 K  
 2530 (IUPAC, 2018). Given the uncertainty in value of  $K_{eq}$  used by Noremsaune et al. (1995) we are  
 2531 not able to scale their result to the latest preferred equilibrium coefficient of  $K_{eq}$ . The value in the  
 2532 table above is that reported by Noremsaune et al. (1995).
- 2533 (e) NO<sub>3</sub> radicals were produced by mixing O<sub>3</sub> with an excess of NO<sub>2</sub>, to establish an equilibrium  
 2534 between NO<sub>2</sub>, NO<sub>3</sub>, and N<sub>2</sub>O<sub>5</sub> in 740 Torr (986 mbar) of air. The decay of CH<sub>2</sub>=CHCl was  
 2535 monitored relative to that of C<sub>2</sub>H<sub>4</sub> and a rate coefficient ratio  $k(\text{NO}_3 + \text{CH}_2=\text{CHCl})/k(\text{NO}_3 + \text{C}_2\text{H}_4) =$   
 2536  $1.78 \pm 0.27$  was measured. Using  $k(\text{NO}_3 + \text{C}_2\text{H}_4) = 2.1 \times 10^{-16}$  (Atkinson et al., 2006) gives  $k(\text{NO}_3 +$   
 2537  $\text{CH}_2=\text{CHCl}) = (3.74 \pm 0.57) \times 10^{-16}$  cm<sup>3</sup> molecule<sup>-1</sup> s<sup>-1</sup>.

2538  
2539  
2540

### Preferred Values

| Parameter                                              | Value                               | T/K     |
|--------------------------------------------------------|-------------------------------------|---------|
| $k / \text{cm}^3 \text{ molecule}^{-1} \text{ s}^{-1}$ | $1.8 \times 10^{-13} \exp(-1780/T)$ | 260-380 |
| $k / \text{cm}^3 \text{ molecule}^{-1} \text{ s}^{-1}$ | $4.6 \times 10^{-16}$               | 298     |
| Reliability                                            |                                     |         |
| $\Delta \log k$                                        | $\pm 0.10$                          | 298     |
| $\Delta E/R$                                           | $\pm 300$                           | 260-380 |

2541  
2542  
2543

#### *Comments on Preferred Values*

2544 There is good agreement in the absolute and relative rate measurements by Noremsaune et al. (1997)  
2545 and Atkinson et al. (1987). The preferred Arrhenius expression is that reported by Noremsaune et al.  
2546 (1997) which gives the value at 298 K in the table above.

2547  
2548  
2549

#### References

- 2550 Andersson, Y., and Ljungstrom, E.: Atmos. Environ., 23, 1153, 1989.
- 2551 Atkinson, R., Aschmann, S. M., and Goodman, M. A.: Int. J. Chem. Kinet., 19, 299, 1987.
- 2552 Atkinson, R., Baulch, D. L., Cox, R. A., Crowley, J. N., Hampson, R. F., Hynes, R. G., Jenkin, M. E., Rossi,  
2553 M. J., and Troe, J.: Atmos. Chem. Phys., 6, 3625, 2006; IUPAC Task Group on Atmospheric Chemical  
2554 Kinetic Data Evaluation, <https://iupac.aeris-data.fr/>.
- 2555 Noremsaune, I. M. W., Hjorth, J.; and Nielsen, C. J.: J. Atmos. Chem., 21, 223, 1995.
- 2556 Noremsaune, I. M. W., Langer, S., Ljungström, E., and Nielsen, C. J.: J. Chem. Soc., Faraday Trans., 93, 525,  
2557 1997.
- 2558 Wayne, R. P., Barnes, I., Biggs, P., Burrows, J. B., Canosa-Mas, C. E., Hjorth, J., LeBras, G., Moortgat, G.,  
2559 Perner, D., Poulet, G., Restelli, G., and Sidebottom, H.: Atmos. Environ. 25A, 1, 1991.
- 2560  
2561  
2562

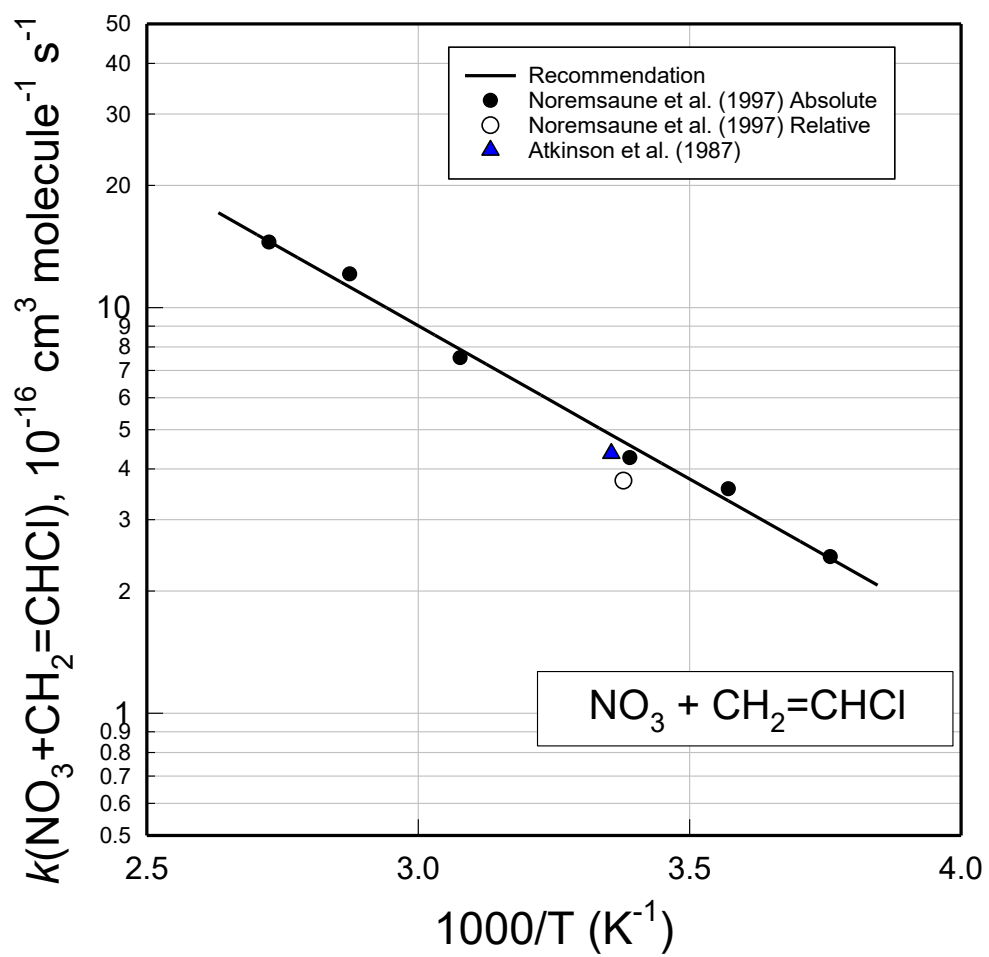

2563  
2564

2567  
 2568 **O<sub>3</sub> + CF<sub>2</sub>=CF<sub>2</sub> → products**

2569 **Rate coefficient data**

2570

2571

| <i>k</i> /cm <sup>3</sup> molecule <sup>-1</sup> s <sup>-1</sup> | Temp./K | Reference             | Technique/ Comments |
|------------------------------------------------------------------|---------|-----------------------|---------------------|
| <i>Absolute Rate Coefficients</i>                                |         |                       |                     |
| 1.34 × 10 <sup>-16</sup>                                         | 298     | Heicklen (1966)       | S-IR (a)            |
| 2.63 × 10 <sup>-13</sup> exp(-4780/T)                            | 273-373 | Toby and Toby (1976)  | S-UV (b)            |
| 2.84 × 10 <sup>-20</sup>                                         | 298     |                       |                     |
| (4.80 ± 0.62) × 10 <sup>-21</sup>                                | 298     | Acerboni et al., 1999 | S-FTIR (c)          |

2572  
 2573 **Comments**

- 2574
- 2575 (a) Kinetic data were derived by following the initial rate of formation of the reaction product COF<sub>2</sub>
- 2576 using IR spectroscopy following the mixing of 0.7-24 Torr of O<sub>3</sub> with 0.2-5.7 Torr of C<sub>2</sub>F<sub>4</sub>.
- 2577 (b) UV absorption at 254 nm was used to follow the loss of ozone in the presence of an excess of
- 2578 C<sub>2</sub>F<sub>4</sub> following mixing 0.06-0.1 Torr of O<sub>3</sub> with 3.0-7.9 Torr of C<sub>2</sub>F<sub>4</sub>.
- 2579 (c) FTIR spectroscopy was used to follow the loss of C<sub>2</sub>F<sub>4</sub> (2-4 ppmv) in the presence of a large
- 2580 excess of O<sub>3</sub> (25-600 ppmv) in 740 Torr (986 mbar) of air at 298 K. Cyclohexane (20-60 ppmv)
- 2581 was added to scavenge radical products of the reaction of O<sub>3</sub> with C<sub>2</sub>F<sub>4</sub> which could lead to
- 2582 unwanted secondary loss of C<sub>2</sub>F<sub>4</sub>. First order decay of C<sub>2</sub>F<sub>4</sub> was observed and the pseudo-first
- 2583 order loss rates were linearly dependent on [O<sub>3</sub>].

2584  
 2585 **Preferred Values**

2586

| Parameter                                                        | Value                   | T/K |
|------------------------------------------------------------------|-------------------------|-----|
| <i>k</i> /cm <sup>3</sup> molecule <sup>-1</sup> s <sup>-1</sup> | 4.8 × 10 <sup>-21</sup> | 298 |
| <i>Reliability</i>                                               |                         |     |
| Δ log <i>k</i>                                                   | 0.15                    | 298 |

2587  
 2588 *Comments on Preferred Values*

2589

2590 The chemical systems used by Heicklen (1966) and Toby and Toby (1976) in which high

2591 concentrations (of the order of Torr) of O<sub>3</sub> and C<sub>2</sub>F<sub>4</sub> were mixed in the absence of diluent gas and

2592 kinetic data were obtained by monitoring the rate of formation of either COF<sub>2</sub> product (Heicklen,

2593 1966) or O<sub>3</sub> reactant (Toby and Toby, 1976). The kinetic behaviour observed was complex indicating

2594 the presence of substantial complications from secondary chemistry, and hence the rate coefficients

2595 derived are likely upper limits. The study by Acerboni et al. (1999) employed lower concentrations of

2596 reactants in 740 Torr of air diluent and derived kinetic data by monitoring the loss of C<sub>2</sub>F<sub>4</sub> in the

2597 presence of excess O<sub>3</sub>. The loss of C<sub>2</sub>F<sub>4</sub> followed first order kinetics and the pseudo first order rate

2598 coefficients increased linearly with [O<sub>3</sub>]. The preferred value is based on the result from Acerboni et

2599 al. (1999) with uncertainties increased to reflect the fact that it is based on a single study.

2600  
 2601 **References**

- 2603 Acerboni, G., Jensen, N. R., Rindone, B., Hjorth, J.: Chem. Phys. Lett., 309, 364, 1999.  
2604 Heicklen, J.: J. Phys. Chem., 70, 477, 1966.  
2605 Toby, F.S.; Toby, S.: J. Phys. Chem., 80, 2313, 1976.  
2606  
2607

2610 **O<sub>3</sub> + CF<sub>3</sub>CH=CH<sub>2</sub> (HFO-1243zf) → products**

2611 **Rate coefficient data**

| $k/\text{cm}^3 \text{ molecule}^{-1} \text{ s}^{-1}$ | Temp./K | Reference                      | Technique/ Comments |
|------------------------------------------------------|---------|--------------------------------|---------------------|
| <i>Absolute Rate Coefficients</i>                    |         |                                |                     |
| $(3.5 \pm 0.3) \times 10^{-19}$                      | 296     | Sulbaek Andersen et al. (2005) | S-FTIR (a)          |
| $(1.41 \pm 0.26) \times 10^{-20}$                    | 296     | McGillen et al. (2023)         | S-UV (b)            |
| $7.07 \times 10^{-16} \exp(-3236/T)$                 | 296-384 |                                |                     |
| <i>Relative Rate Coefficients</i>                    |         |                                |                     |
| $(3.0 \pm 0.4) \times 10^{-19}$                      | 298     | Soto et al. (2018)             | RR (c)              |
| $(1.15 \pm 0.23) \times 10^{-20}$                    | 296     | McGillen et al. (2023)         | RR (d)              |
| $(1.25 \pm 0.26) \times 10^{-20}$                    | 296     |                                | RR (e)              |

2615 **Comments**

- 2616
- 2617
- 2618 (a) The decay of CF<sub>3</sub>CH=CH<sub>2</sub> was monitored by FTIR spectroscopy when exposed to ozone. Reaction mixtures consisted of CF<sub>3</sub>CH=CH<sub>2</sub>, cyclohexane, and O<sub>3</sub> in 700 Torr of air diluent. Cyclohexane was added to avoid potential problems associated with the loss of CF<sub>3</sub>CH=CH<sub>2</sub> via reaction with OH radicals formed in the reaction system. The loss of CF<sub>3</sub>CH=CH<sub>2</sub> followed first order kinetics and the pseudo first-order rate coefficients increased linearly with [O<sub>3</sub>].
- 2619
- 2620
- 2621
- 2622
- 2623 (b) The decay of ozone was monitored with a commercial ozone analyser (using UV absorption) in the presence of an excess of CF<sub>3</sub>CH=CH<sub>2</sub> in the presence of cyclohexane and HC(O)OH which were added as scavengers for HO radicals and stabilized Criegee intermediates, respectively. The diluent and pressure was not specified but was 1 atmosphere of air (McGillen, private communication). The loss of O<sub>3</sub> followed first order kinetics and the pseudo first-order rate coefficients increased linearly with [CF<sub>3</sub>CH=CH<sub>2</sub>].
- 2624
- 2625
- 2626
- 2627
- 2628
- 2629 (c) The loss of CF<sub>3</sub>CH=CH<sub>2</sub> was measured relative to that of acrolein (CH<sub>2</sub>=CHCHO) in 720 Torr of synthetic air. Cyclohexane was added to avoid potential problems associated with the loss of CF<sub>3</sub>CH=CH<sub>2</sub> via reaction with OH radicals formed in the reaction system. A rate constant ratio of  $k(\text{O}_3+\text{CF}_3\text{CH}=\text{CH}_2)/k(\text{O}_3+\text{CH}_2=\text{CHCHO}) = 0.99 \pm 0.01$  was measured which can be combined with  $k(\text{O}_3+\text{CH}_2=\text{CHCHO}) = (3.0 \pm 0.4) \times 10^{-19} \text{ cm}^3 \text{ molecule}^{-1} \text{ s}^{-1}$  (Treacy et al. 1992) to give  $k(\text{O}_3+\text{CF}_3\text{CH}=\text{CH}_2) = (3.0 \pm 0.4) \times 10^{-19} \text{ cm}^3 \text{ molecule}^{-1} \text{ s}^{-1}$ .
- 2630
- 2631
- 2632
- 2633
- 2634
- 2635 (d) The decay of CF<sub>3</sub>CH=CH<sub>2</sub> was measured relative to that of HCFO-1233xf (CF<sub>3</sub>CCl=CH<sub>2</sub>) in the presence of a large excess of ozone in 1 bar of air. To avoid unwanted secondary chemistry isopropanol was added to scavenge both HO radicals and stabilized Criegee intermediates which are formed in the system. A rate constant ratio of  $k(\text{O}_3+\text{CF}_3\text{CH}=\text{CH}_2)/k(\text{O}_3+\text{CF}_3\text{CCl}=\text{CH}_2) = 3.257$  was measured and was combined with  $k(\text{O}_3+\text{CF}_3\text{CCl}=\text{CH}_2) = 3.54 \times 10^{-21} \text{ cm}^3 \text{ molecule}^{-1} \text{ s}^{-1}$  (McGillen et al. 2023) to give  $k(\text{O}_3+\text{CF}_3\text{CH}=\text{CH}_2) = (1.15 \pm 0.23) \times 10^{-20} \text{ cm}^3 \text{ molecule}^{-1} \text{ s}^{-1}$ .
- 2636
- 2637
- 2638
- 2639
- 2640
- 2641 (e) The decay of CF<sub>3</sub>CH=CH<sub>2</sub> was measured relative to that of HFO-1234yf (CF<sub>3</sub>CF=CH<sub>2</sub>) in the presence of a large excess of ozone in 1 bar of air. To avoid unwanted secondary chemistry isopropanol was added to scavenge both HO radicals and stabilized Criegee intermediates which are formed in the system. A rate constant ratio of  $k(\text{O}_3+\text{CF}_3\text{CH}=\text{CH}_2)/k(\text{O}_3+\text{CF}_3\text{CF}=\text{CH}_2) = 4.885$  was measured and was combined with  $k(\text{O}_3+\text{CF}_3\text{CF}=\text{CH}_2) = 2.56 \times 10^{-21} \text{ cm}^3 \text{ molecule}^{-1} \text{ s}^{-1}$  [McGillen et al. 2023] to give  $k(\text{O}_3+\text{CF}_3\text{CH}=\text{CH}_2) = (1.25 \pm 0.26) \times 10^{-20} \text{ cm}^3 \text{ molecule}^{-1} \text{ s}^{-1}$ .
- 2642
- 2643
- 2644
- 2645
- 2646
- 2647

2648  
2649

### Preferred Values

| Parameter                                              | Value                                                          | T/K            |
|--------------------------------------------------------|----------------------------------------------------------------|----------------|
| $k / \text{cm}^3 \text{ molecule}^{-1} \text{ s}^{-1}$ | $1.43 \times 10^{-20}$<br>$4.65 \times 10^{-16} \exp(-3096/T)$ | 298<br>290-390 |
| <i>Reliability</i>                                     |                                                                |                |
| $\Delta \log k$                                        | 0.08                                                           | 298            |
| $\Delta E/R$                                           | 200                                                            |                |

2650

#### Comments on Preferred Values

2652

2653 The preferred expression is taken from a fit to the absolute rate data from McGillen et al. (2023).  
2654 The value at 298K is evaluated from the preferred Arrhenius expression. The relative rate and  
2655 absolute rate results reported by McGillen et al. (2023) are in good agreement but are substantially  
2656 lower than the results reported by Sulbaek Andersen et al. (2005) and Soto et al. (2018). As discussed  
2657 by McGillen et al. (2023), the cyclohexane scavenger used by Sulbaek Andersen et al. (2005) and  
2658 Soto et al. (2018) would be effective for HO radicals but not for Criegee intermediates. Hence, the  
2659 larger rate constants reported by Sulbaek Andersen et al. (2005) and Soto et al. (2018) presumably  
2660 reflect secondary loss of  $\text{CF}_3\text{CH}=\text{CH}_2$  by reaction with Criegee intermediates. McGillen et al. (2023)  
2661 showed that  $\text{CF}_3\text{H}$  is formed in a yield of  $(0.37 \pm 0.02) \%$  in a “hot acid” reaction channel.

2662

2663

### References

2664

2665 McGillen, M. R.; Zachary, T. P.; Fried, M.; Khan, A. H.; Kuwata, K. T.; Martin, C. M.; O’Doherty, S.;  
2666 Pecere, F.; Shallcross, D. E.; Stanley, K. M.; and Zhang, K.: PNAS, 120, e2312714120, 2023.

2667 Soto, A.; Ballesteros, B.; Jiménez, E.; Antinõlo, M.; Martínez, E.; and Albaladejo, J.: Chemosphere 201,  
2668 318–327, 2018.

2669 Sulbæk Andersen, M. P.; Nielsen, O. J.; Toft, A.; Nakayama, T.; Matsumi, Y.; Waterland, R. L.; Buck, R. C.;  
2670 Hurley, M. D.; and Wallington, T. J.: J. Photoch. Photobio. A 176, 124–128, 2005.

2671 Treacy, J.; Elhag, M.; O’Farrell, D.; Sidebottom, H.: Ber. Bunsen-Ges. Phys. Chem., 96, 422–427, 1992.

2672

2673

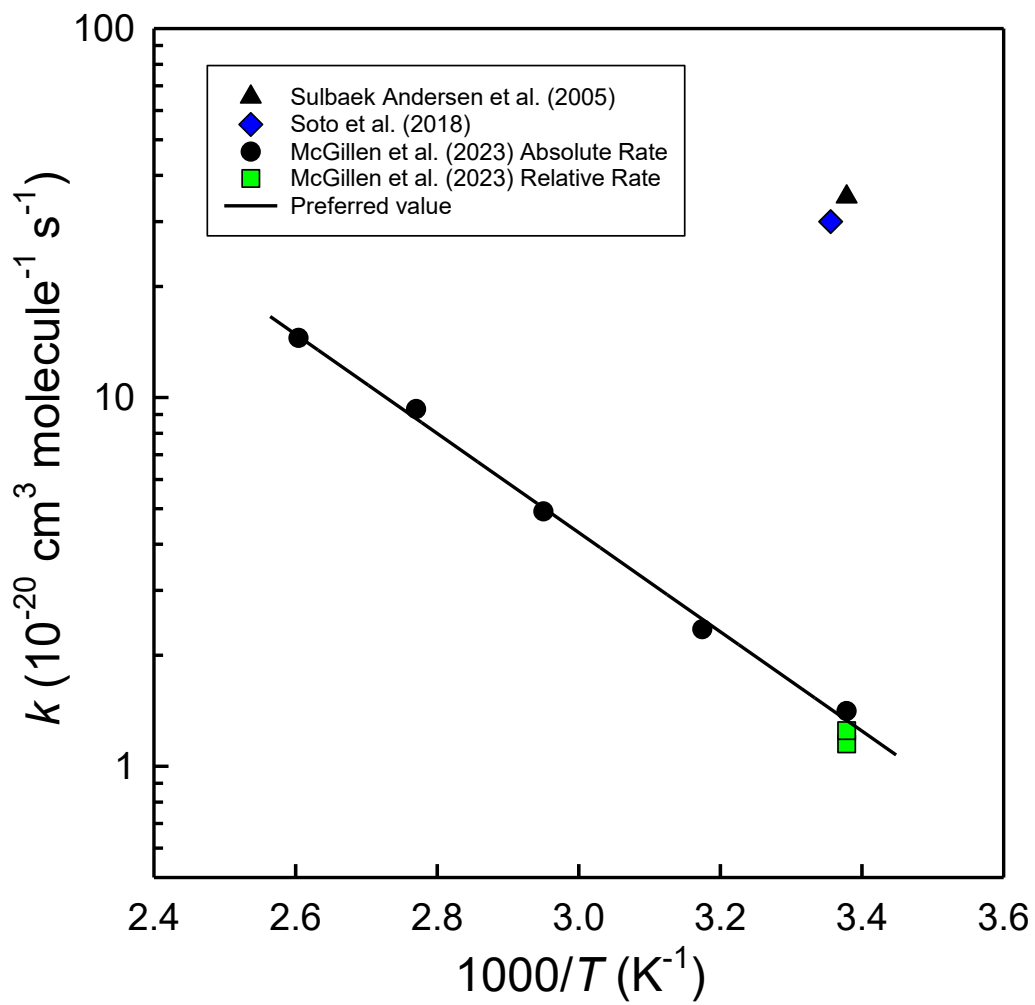

2674  
2675

2678 **O<sub>3</sub> + CF<sub>3</sub>CF=CH<sub>2</sub> (HFO-1234yf) → products**

2680 **Rate coefficient data**

| <i>k</i> /cm <sup>3</sup> molecule <sup>-1</sup> s <sup>-1</sup> | Temp./K | Reference              | Technique/ Comments |
|------------------------------------------------------------------|---------|------------------------|---------------------|
| <i>Absolute Rate Coefficients</i>                                |         |                        |                     |
| (2.77 ± 0.21) × 10 <sup>-21</sup>                                | 296     | Nielsen et al. (2007)  | S-FTIR (a)          |
| (2.56 ± 1.42) × 10 <sup>-21</sup>                                | 296     | McGillen et al. (2023) | S-UV (b)            |
| <i>Relative Rate Coefficients</i>                                |         |                        |                     |
| (2.37 ± 0.47) × 10 <sup>-21</sup>                                | 296     | McGillen et al. (2023) | RR (c)              |
| (2.58 ± 0.53) × 10 <sup>-21</sup>                                | 296     |                        | RR (d)              |

2683 **Comments**

- 2684
- 2685
- 2686 (a) The decay of CF<sub>3</sub>CF=CH<sub>2</sub> was monitored by FTIR spectroscopy when exposed to ozone in 700  
 2687 Torr of air diluent. Cyclohexane was added to avoid potential problems associated with the loss  
 2688 of CF<sub>3</sub>CF=CH<sub>2</sub> via reaction with OH radicals formed in the reaction system. The loss of  
 2689 CF<sub>3</sub>CF=CH<sub>2</sub> followed first order kinetics and the pseudo first order rate coefficients increased  
 2690 linearly with [O<sub>3</sub>].
- 2691 (b) The decay of ozone was monitored via UV absorption in the presence of an excess of  
 2692 CF<sub>3</sub>CF=CH<sub>2</sub>. Either *i*-propanol, or cyclohexane and HC(O)OH which were added as scavengers  
 2693 for HO radicals and stabilized Criegee intermediates. The diluent and pressure was 1 atmosphere  
 2694 of air (McGillen, private communication). The loss of O<sub>3</sub> followed first order kinetics and the  
 2695 pseudo first order rate coefficients increased linearly with [CF<sub>3</sub>CF=CH<sub>2</sub>].
- 2696 (c) The decay of CF<sub>3</sub>CF=CH<sub>2</sub> was measured relative to that of HCFO-1233xf (CF<sub>3</sub>CCl=CH<sub>2</sub>) in the  
 2697 presence of a large excess of ozone in 1 bar of air. To avoid unwanted secondary chemistry  
 2698 isopropanol was added to scavenge HO radicals and stabilized Criegee intermediates which are  
 2699 formed in the system. A rate constant ratio of  $k(\text{O}_3 + \text{CF}_3\text{CF}=\text{CH}_2)/k(\text{O}_3 + \text{CF}_3\text{CCl}=\text{CH}_2) = (0.669 \pm$   
 2700  $0.133)$  was measured and combined with  $k(\text{O}_3 + \text{CF}_3\text{CCl}=\text{CH}_2) = 3.54 \times 10^{-21} \text{ cm}^3 \text{ molecule}^{-1} \text{ s}^{-1}$   
 2701 (McGillen et al., 2023) to give  $k(\text{O}_3 + \text{CF}_3\text{CF}=\text{CH}_2) = (2.37 \pm 0.47) \times 10^{-21} \text{ cm}^3 \text{ molecule}^{-1} \text{ s}^{-1}$ .
- 2702 (d) The decay of CF<sub>3</sub>CF=CH<sub>2</sub> was measured relative to that of HFO-1243zf (CF<sub>3</sub>CH=CH<sub>2</sub>) in the  
 2703 presence of a large excess of ozone in 1 bar of air. To avoid unwanted secondary chemistry  
 2704 isopropanol was added to scavenge HO radicals and stabilized Criegee intermediates which are  
 2705 formed in the system. A rate constant ratio of  $k(\text{O}_3 + \text{CF}_3\text{CF}=\text{CH}_2)/k(\text{O}_3 + \text{CF}_3\text{CH}=\text{CH}_2) = (0.205 \pm$   
 2706  $0.042)$  was measured and combined with  $k(\text{O}_3 + \text{CF}_3\text{CH}=\text{CH}_2) = 1.26 \times 10^{-20} \text{ cm}^3 \text{ molecule}^{-1} \text{ s}^{-1}$  to  
 2707 give  $k(\text{O}_3 + \text{CF}_3\text{CF}=\text{CH}_2) = (2.58 \pm 0.53) \times 10^{-21} \text{ cm}^3 \text{ molecule}^{-1} \text{ s}^{-1}$ .

2708 **Preferred Values**

| Parameter                                                        | Value                    | T/K |
|------------------------------------------------------------------|--------------------------|-----|
| <i>k</i> /cm <sup>3</sup> molecule <sup>-1</sup> s <sup>-1</sup> | 2.67 × 10 <sup>-21</sup> | 298 |
| <i>Reliability</i>                                               |                          |     |
| Δ log <i>k</i>                                                   | 0.08                     | 298 |

2711  
2712  
2713  
2714  
2715  
2716  
2717  
2718  
2719  
2720  
2721  
2722  
2723  
2724  
2725  
2726  
2727  
2728

---

*Comments on Preferred Values*

There is good agreement in the results from the absolute rate studies of Nielsen et al. (2007) and McGillen et al. (2023) and the relative rate studies by McGillen et al. (2023). The preferred value is the average of the two studies. McGillen et al. (2023) performed experiments to look for the formation of CF<sub>4</sub> and CF<sub>3</sub>H as products but did not observe them.

**References**

McGillen, M. R.; Zachary, T. P.; Fried, M.; Khan, A. H.; Kuwata, K. T.; Martin, C. M.; O'Doherty, S.; Pecere, F.; Shallcross, D. E.; Stanley, K. M.; and Zhang, K.: PNAS, 120, e2312714120, 2023.  
Nielsen, O. J.; Javadi, M. S.; Sulbaek Andersen, M. P.; Hurley, M. D.; Wallington, T. J.; and Singh, R.: Chem. Phys. Lett. 439, 18, 2007.

2729 **oFOx129: O<sub>3</sub> + E-CF<sub>3</sub>CH=CHF (HFO-1234ze(E))**  
2730 Last evaluated: June 2025; Last change in preferred values: June 2024.

2731  
2732  
2733  
2734  
2735

**O<sub>3</sub> + E-CF<sub>3</sub>CH=CHF (HFO-1234ze(E)) → products**

**Rate coefficient data**

| <i>k</i> /cm <sup>3</sup> molecule <sup>-1</sup> s <sup>-1</sup> | Temp./K | Reference                 | Technique/ Comments |
|------------------------------------------------------------------|---------|---------------------------|---------------------|
| <i>Absolute Rate Coefficients</i>                                |         |                           |                     |
| (2.81 ± 0.21) × 10 <sup>-21</sup>                                | 296     | Søndergaard et al. (2007) | S-FTIR (a)          |
| <i>Relative Rate Coefficients</i>                                |         |                           |                     |
| (2.19 ± 0.43) × 10 <sup>-21</sup>                                | 296     | McGillen et al. (2023)    | RR (b)              |

2736  
2737  
2738

**Comments**

- 2739 (a) The decay of E-CF<sub>3</sub>CH=CHF was monitored by FTIR spectroscopy when exposed to ozone in  
2740 700 Torr of air diluent. Cyclohexane was added to avoid potential problems associated with the  
2741 loss of E-CF<sub>3</sub>CH=CHF via reaction with OH radicals formed in the reaction system. The loss of  
2742 E-CF<sub>3</sub>CH=CHF followed first-order kinetics and the pseudo first-order rate coefficients increased  
2743 linearly with [O<sub>3</sub>].
- 2744 (b) The decay of E-CF<sub>3</sub>CH=CHF was measured relative to that of HCFO-1233xf (CF<sub>3</sub>CCl=CH<sub>2</sub>) in  
2745 the presence of a large excess of ozone in 1 bar of air. To avoid unwanted secondary chemistry  
2746 isopropanol was added to scavenge HO radicals and stabilized Criegee intermediates which are  
2747 formed in the system. A rate constant ratio of  $k(\text{O}_3 + \text{E-CF}_3\text{CH=CHF})/k(\text{O}_3 + \text{CF}_3\text{CCl=CH}_2) =$   
2748  $0.617 \pm 0.121$  was measured. Combining this with  $k(\text{O}_3 + \text{CF}_3\text{CCl=CH}_2) = 3.54 \times 10^{-21}$  cm<sup>3</sup>  
2749 molecule<sup>-1</sup> s<sup>-1</sup> (McGillen et al., 2023) gives  $k(\text{O}_3 + \text{E-CF}_3\text{CH=CHF}) = (2.19 \pm 0.43) \times 10^{-21}$  cm<sup>3</sup>  
2750 molecule<sup>-1</sup> s<sup>-1</sup>.

2751  
2752  
2753

**Preferred Values**

| Parameter                                                        | Value                    | T/K |
|------------------------------------------------------------------|--------------------------|-----|
| <i>k</i> /cm <sup>3</sup> molecule <sup>-1</sup> s <sup>-1</sup> | 2.50 × 10 <sup>-21</sup> | 298 |
| <i>Reliability</i>                                               |                          |     |
| Δ log <i>k</i>                                                   | 0.10                     | 298 |

2754  
2755

*Comments on Preferred Values*

2756  
2757  
2758  
2759  
2760

The preferred value is the average from the absolute rate study by Søndergaard et al. (2007) and the relative rate study by McGillen et al. (2023). McGillen et al. (2023) showed that CF<sub>3</sub>H is formed in a yield of (3.11 ± 0.05) % in a “hot acid” reaction channel.

**References**

- 2761 McGillen, M. R.; Zachary, T. P.; Fried, M.; Khan, A. H.; Kuwata, K. T.; Martin, C. M.; O’Doherty, S.;  
2762 Pecere, F.; Shallcross, D. E.; Stanley, K. M.; and Zhang, K.: PNAS, 120, e2312714120, 2023.  
2763 Søndergaard, R., Nielsen, O. J., Hurley, M. D., Wallington, T. J., Singh, R.: Chem. Phys. Lett, 443,  
2764 199, 2007.  
2765

2766 **oFOx156: O<sub>3</sub> + Z-CF<sub>3</sub>CH=CHF (HFO-1234(Z))**  
2767 Last evaluated: June 2023; Last change in preferred values: June 2019.

2768  
2769  
2770  
2771  
2772

**O<sub>3</sub> + Z-CF<sub>3</sub>CH=CHF (HFO-1234(Z)) → products**

**Rate coefficient data**

| <i>k</i> /cm <sup>3</sup> molecule <sup>-1</sup> s <sup>-1</sup> | Temp./K | Reference             | Technique/ Comments |
|------------------------------------------------------------------|---------|-----------------------|---------------------|
| <i>Absolute Rate Coefficients</i>                                |         |                       |                     |
| (1.65 ± 0.16) × 10 <sup>-21</sup>                                | 296     | Nilsson et al. (2009) | S-FTIR (a)          |

2773  
2774  
2775  
2776  
2777  
2778  
2779  
2780  
2781  
2782  
2783  
2784

**Comments**

- (a) The decay of Z-CF<sub>3</sub>CH=CHF was monitored by FTIR spectroscopy when exposed to ozone. Reaction mixtures consisted of 14.7-16.2 mTorr Z-CF<sub>3</sub>CH=CHF, 21-65 mTorr cyclohexane, and 950–2260 mTorr O<sub>3</sub> in 700 Torr (933 mbar) of air diluent. Cyclohexane was added to avoid potential problems associated with the loss of Z-CF<sub>3</sub>CH=CHF via reaction with OH radicals formed in the reaction system. The loss of Z-CF<sub>3</sub>CH=CHF followed first order kinetics and the pseudo first order rate coefficients increased linearly with [O<sub>3</sub>].

**Preferred Values**

| Parameter                                                        | Value                   | T/K |
|------------------------------------------------------------------|-------------------------|-----|
| <i>k</i> /cm <sup>3</sup> molecule <sup>-1</sup> s <sup>-1</sup> | 1.7 × 10 <sup>-21</sup> | 298 |
| <i>Reliability</i>                                               |                         |     |
| Δ log <i>k</i>                                                   | 0.30                    | 298 |

2785  
2786  
2787  
2788  
2789  
2790  
2791  
2792  
2793  
2794  
2795  
2796  
2797

*Comments on Preferred Values*

The preferred value is taken from the work by Nilsson et al. (2009); the only study of this reaction. As the authors did not consider the potential loss of Z-CF<sub>3</sub>CH=CHF via reaction with Criegee intermediates, we increase the uncertainty substantially.

**References**

Nilsson, E. J. K., Nielsen, O. J., Johnson, M. S., Hurley, M. D., and Wallington, T. J.: Chem. Phys. Lett., 473, 233, 2009.

2800 **O<sub>3</sub> + CF<sub>3</sub>CF=CF<sub>2</sub> (FO-1216) → products**

2801 **Rate coefficient data**

| <i>k</i> /cm <sup>3</sup> molecule <sup>-1</sup> s <sup>-1</sup> | Temp./K | Reference              | Technique/ Comments |
|------------------------------------------------------------------|---------|------------------------|---------------------|
| <i>Absolute Rate Coefficients</i>                                |         |                        |                     |
| 2.2 × 10 <sup>-17</sup>                                          | 298     | Heicklen (1966)        | S-IR (a)            |
| < 3 × 10 <sup>-21</sup>                                          | 296     | Mashino et al. (2000)  | S-FTIR (b)          |
| (6.2 ± 1.5) × 10 <sup>-22</sup>                                  | 298     | Acerboni et al. (2001) | S-FTIR (c)          |

2805 **Comments**

- 2806
- 2807
- 2808 (a) Kinetic data were derived by following the initial rate of formation of the reaction product COF<sub>2</sub>  
 2809 using IR spectroscopy following the mixing of 1.9-14.8 Torr of O<sub>3</sub> with 0.22-7.0 Torr of  
 2810 CF<sub>3</sub>CF=CF<sub>2</sub>.
- 2811 (b) The decay of CF<sub>3</sub>CF=CF<sub>2</sub> was monitored by FTIR spectroscopy when exposed to ozone.  
 2812 Reaction mixtures consisted of 1.5-8.1 mTorr CF<sub>3</sub>CF=CF<sub>2</sub> and 899–963 mTorr O<sub>3</sub> in 700 Torr of  
 2813 O<sub>2</sub> diluent. There was no scavenger, such as cyclohexane, added to suppress unwanted radical  
 2814 chemistry in the system. The loss of CF<sub>3</sub>CF=CF<sub>2</sub> followed first order kinetics but there was a  
 2815 systematic increase in the pseudo first order loss rates with increasing [CF<sub>3</sub>CF=CF<sub>2</sub>]. The  
 2816 simplest explanation of this observation is loss of CF<sub>3</sub>CF=CF<sub>2</sub> via reaction with products of the  
 2817 O<sub>3</sub> + CF<sub>3</sub>CF=CF<sub>2</sub> reaction. Mashino et al. (2000) chose to quote an upper limit based on the  
 2818 lowest value of *k*(O<sub>3</sub>+ CF<sub>3</sub>CF=CF<sub>2</sub>) measured in their study.
- 2819 (c) FTIR spectroscopy was used to follow the loss of CF<sub>3</sub>CF=CF<sub>2</sub> (2-5 ppmv) in the presence of a large  
 2820 excess of O<sub>3</sub> (25-600 ppmv) in 740 Torr (986 mbar) of air at 298 K. Cyclohexane was added as a  
 2821 scavenge to suppress potential complications from unwanted radical reactions. First order decay of  
 2822 CF<sub>3</sub>CF=CF<sub>2</sub> was observed and the pseudo first order loss rates were linearly dependent on [O<sub>3</sub>].

2823 **Preferred Values**

| Parameter                                                        | Value                   | T/K |
|------------------------------------------------------------------|-------------------------|-----|
| <i>k</i> /cm <sup>3</sup> molecule <sup>-1</sup> s <sup>-1</sup> | 6.2 × 10 <sup>-22</sup> | 298 |
| <i>Reliability</i><br>Δ log <i>k</i>                             | 0.15                    | 298 |

2824 **Comments on Preferred Values**

2825

2826

2827 The preferred value is based on the measurements by Acerboni et al. (2001) which were conducted using  
 2828 cyclohexane to suppress radical chemistry in the system leading to additional loss of CF<sub>3</sub>CF=CF<sub>2</sub>.  
 2829 Mashino et al. (2000) showed that in the absence of a radical scavenger such as cyclohexane there is  
 2830 additional unwanted loss of CF<sub>3</sub>CF=CF<sub>2</sub> and that the severity of this complication increases with the  
 2831 [CF<sub>3</sub>CF=CF<sub>2</sub>] used in the experiment. The early experiments by Heicklen (1966) used particularly high  
 2832 [CF<sub>3</sub>CF=CF<sub>2</sub>] and secondary losses of CF<sub>3</sub>CF=CF<sub>2</sub> by radical chain reactions presumably explains the  
 2833 overestimation of the rate coefficient by more than a factor of 10<sup>4</sup> in the early studies.

2837

## References

2838

2839 Acerboni, G., Beukes, J. A., Jensen, N. R., Hjorth, J., Myhre, G., Nielsen, C. J., and Sundet, J. K. : Atmos. Environ., 35, 4113, 2001.

2841 Heicklen, J.: J. Phys. Chem., 70, 477, 1966.

2842 Mashino, M., Ninomiya, Y., Kawasaki, M., Wallington, T. J., and Hurley, M. D.: J. Phys. Chem. A 104, 7255, 2000.

2844

2845 **oFOx157: O<sub>3</sub> + CF<sub>2</sub>=CF<sub>2</sub>=CF<sub>2</sub>**  
 2846 Last evaluated: June 2025; Last change in preferred values: June 2019.

2847 **O<sub>3</sub> + CF<sub>2</sub>=CF<sub>2</sub>=CF<sub>2</sub> → products**

2849 **Rate coefficient data**

| <i>k</i> /cm <sup>3</sup> molecule <sup>-1</sup> s <sup>-1</sup> | Temp./K | Reference              | Technique/ Comments |
|------------------------------------------------------------------|---------|------------------------|---------------------|
| <i>Absolute Rate Coefficients</i>                                |         |                        |                     |
| (6.5 ± 0.2) × 10 <sup>-21</sup>                                  | 298     | Acerboni et al. (2001) | S-FTIR (a)          |
| (1.14±0.94) × 10 <sup>-16</sup> exp[-(2800±225)/T]               | 225-308 | Chen et al. (2005)     | S-FTIR (b)          |
| (9.37±0.70) × 10 <sup>-21</sup>                                  | 298     |                        |                     |

2853 **Comments**

- 2852
- 2853
- 2854
- 2855 (a) FTIR spectroscopy was used to follow the loss of CF<sub>2</sub>=CF<sub>2</sub>=CF<sub>2</sub> (3-5 ppmv) in the presence of  
 2856 a large excess of O<sub>3</sub> (25-600 ppmv) in 740 Torr (986 mbar) of air at 298 K. Cyclohexane (20-60  
 2857 ppmv) was added as a scavenger to suppress potential complications from unwanted radical  
 2858 reactions. First order decay of CF<sub>2</sub>=CF<sub>2</sub>=CF<sub>2</sub> was observed and the pseudo first order loss  
 2859 rates were linearly dependent on [O<sub>3</sub>].
- 2860 (b) The decay of CF<sub>2</sub>=CF<sub>2</sub>=CF<sub>2</sub> was monitored by FTIR spectroscopy when exposed to ozone.  
 2861 Reaction mixtures consisted of 1.2 × 10<sup>14</sup> molecule cm<sup>-3</sup> CF<sub>2</sub>=CF<sub>2</sub>=CF<sub>2</sub> (5 ppmv) and 1.26-  
 2862 6.94 × 10<sup>15</sup> molecule cm<sup>-3</sup> O<sub>3</sub> in 720 Torr of air diluent. Cyclohexane (5.6 × 10<sup>15</sup> molecule cm<sup>-3</sup>)  
 2863 was added as a scavenger to suppress unwanted radical chemistry in the system. The loss of  
 2864 CF<sub>2</sub>=CF<sub>2</sub>=CF<sub>2</sub> followed first order kinetics.

2865 **Preferred Values**

| Parameter                                                        | Value                                 | T/K     |
|------------------------------------------------------------------|---------------------------------------|---------|
| <i>k</i> /cm <sup>3</sup> molecule <sup>-1</sup> s <sup>-1</sup> | 7.9 × 10 <sup>-21</sup>               | 298     |
| <i>k</i> /cm <sup>3</sup> molecule <sup>-1</sup> s <sup>-1</sup> | 9.51 × 10 <sup>-17</sup> exp(-2800/T) | 220-320 |
| <i>Reliability</i>                                               |                                       |         |
| Δ log <i>k</i>                                                   | 0.20                                  | 298     |
| Δ E/R                                                            | ± 300                                 |         |

2868 **Comments on Preferred Values**

2869

2870

2871 The *k*(298 K) values reported by Acerboni et al. (2001) and Chen et al. (2005) differ by approximately  
 2872 30%. However, given the comment by Chen et al. that there was “a systematic uncertainty of 20% in the  
 2873 measurement of O<sub>3</sub> concentration” in their experiments the results from the two studies are probably  
 2874 consistent within the combined experimental uncertainties. The preferred value at 298 K is an average of  
 2875 the results from Acerboni et al. (2001) and Chen et al. (2005). Taking the temperature dependence from  
 2876 Chen et al. (2005) and adjusting the pre-exponential factor to reproduce the preferred value at 298 K  
 2877 gives the preferred Arrhenius expression of *k* = 9.51 × 10<sup>-17</sup> exp(-2800/T) cm<sup>3</sup> molecule<sup>-1</sup> s<sup>-1</sup>.

2881  
2882  
2883  
2884  
2885  
2886  
2887  
2888

## References

- Acerboni, G., Beukes, J. A., Jensen, N. R., Hjorth, J., Myhre, G., Nielsen, C. J., and Sundet, J. K.: Atmos. Environ., 35, 4113, 2001.
- Chen, L., Kutsuna, S., Tokuhashi, K., Uchimaru, T., and Sekiya, A.: Chem. Phys. Lett., 416, 187, 2005.

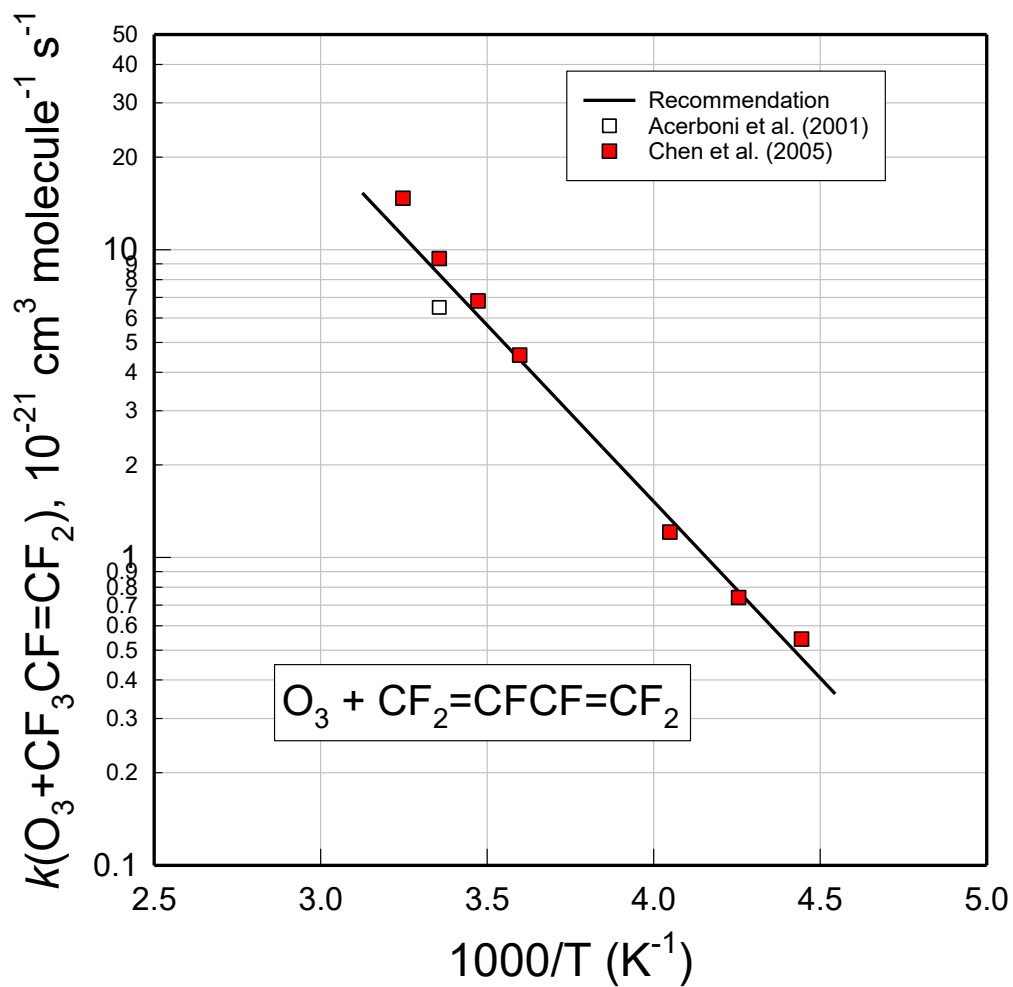

2889  
2890

2893 **O<sub>3</sub> + *E*-CF<sub>3</sub>CH=CHCF<sub>3</sub> (HFO-1336mzz(*E*)) → products**

2894 **Rate coefficient data**

| <i>k</i> /cm <sup>3</sup> molecule <sup>-1</sup> s <sup>-1</sup> | Temp./K | Reference                | Technique/ Comments |
|------------------------------------------------------------------|---------|--------------------------|---------------------|
| <i>Absolute Rate Coefficients</i>                                |         |                          |                     |
| (4.14 ± 0.42) × 10 <sup>-22</sup>                                | 296     | Østerstrøm et al. (2017) | S-FTIR (a)          |
| (5.16 ± 0.40) × 10 <sup>-22</sup>                                | 296     | Baasandorj et al. (2018) | S-FTIR (b)          |

2898 **Comments**

- 2899
- 2900
- 2901 (a) The decay of *E*-CF<sub>3</sub>CH=CHCF<sub>3</sub> was monitored by FTIR spectroscopy when exposed to ozone in  
 2902 700 Torr of air or N<sub>2</sub>/O<sub>2</sub> diluent. Cyclohexane was added to avoid the loss of *E*-CF<sub>3</sub>CH=CHCF<sub>3</sub> via  
 2903 reaction with HO radicals formed in the reaction system. The loss of *E*-CF<sub>3</sub>CH=CHCF<sub>3</sub> followed  
 2904 first order kinetics and the pseudo first order rate coefficients increased linearly with [O<sub>3</sub>].
- 2905 (b) The decay of *E*-CF<sub>3</sub>CH=CHCF<sub>3</sub> was monitored by FTIR spectroscopy when exposed to ozone in  
 2906 10-250 Torr of He diluent. The loss of *E*-CF<sub>3</sub>CH=CHCF<sub>3</sub> followed first order kinetics and the  
 2907 pseudo first order rate coefficients increased linearly with [O<sub>3</sub>].

2908 **Preferred Values**

| Parameter                                                        | Value                    | <i>T</i> /K |
|------------------------------------------------------------------|--------------------------|-------------|
| <i>k</i> /cm <sup>3</sup> molecule <sup>-1</sup> s <sup>-1</sup> | 4.14 × 10 <sup>-22</sup> | 298         |
| <i>Reliability</i>                                               |                          |             |
| Δ log <i>k</i>                                                   | 0.10                     | 298         |

2911 **Comments on Preferred Values**

2912 The preferred value is taken from the absolute rate study by Østerstrøm et al. (2017) in which  
 2913 cyclohexane was added to avoid the loss of *E*-CF<sub>3</sub>CH=CHCF<sub>3</sub> via reaction with HO radicals formed in  
 2914 the reaction system. The result from the study by Baasandorj et al. (2018) is approximately 25%  
 2915 higher than that from Østerstrøm et al. (2017) and probably reflects additional loss of *E*-  
 2916 CF<sub>3</sub>CH=CHCF<sub>3</sub> from reaction with HO radicals.

2917 **References**

- 2918
- 2919
- 2920
- 2921
- 2922 Baasandorj, M., Marshall, P., Waterland, R. L., Ravishankara, A. R., Burkholder, J. B.: J. Phys. Chem. A,  
 2923 122, 4635-4646, 2018.
- 2924 Østerstrøm, F. F.; Andersen, S. T.; Sølling, T. I.; Nielsen, O. J.; Sulbæk Andersen, M. P.: Phys.  
 2925 Chem. Chem. Phys. 19, 735–750, 2017.
- 2926

2927 **oFOx124: O<sub>3</sub> + Z-CF<sub>3</sub>CH=CHCF<sub>3</sub> (HFO-1336mzz(Z))**  
 2928 Last evaluated: June 2025; Last change in preferred values: June 2024.

2929 **O<sub>3</sub> + Z-CF<sub>3</sub>CH=CHCF<sub>3</sub> (HFO-1336mzz(Z)) → products**

2930 **Rate coefficient data**

| <i>k</i> /cm <sup>3</sup> molecule <sup>-1</sup> s <sup>-1</sup> | Temp./K | Reference                | Technique/ Comments |
|------------------------------------------------------------------|---------|--------------------------|---------------------|
| <i>Absolute Rate Coefficients</i>                                |         |                          |                     |
| (6.55 ± 0.70) × 10 <sup>-22</sup>                                | 296     | Østerstrøm et al. (2017) | S-FTIR (a)          |
| <i>Relative Rate Coefficients</i>                                |         |                          |                     |
| (7.63 ± 1.53) × 10 <sup>-22</sup>                                | 296     | McGillen et al. (2023)   | RR (b)              |

2934 **Comments**

- 2935
- 2936
- 2937 (a) The decay of Z-CF<sub>3</sub>CH=CHCF<sub>3</sub> was monitored by FTIR spectroscopy when exposed to ozone. Cyclohexane was added to avoid potential problems associated with the loss of Z-CF<sub>3</sub>CH=CHCF<sub>3</sub> via reaction with OH radicals formed in the reaction system. The loss of Z-CF<sub>3</sub>CH=CHCF<sub>3</sub> was found to be approximately 15% greater in the absence of cyclohexane than in the presence of cyclohexane. The loss of Z-CF<sub>3</sub>CH=CHCF<sub>3</sub> followed first order kinetics and the pseudo first order rate coefficients increased linearly with [O<sub>3</sub>].
- 2938
- 2939
- 2940
- 2941
- 2942
- 2943 (b) The decay of Z-CF<sub>3</sub>CH=CHCF<sub>3</sub> was measured relative to that of HCFO-1233xf (CF<sub>3</sub>CCl=CH<sub>2</sub>) in the presence of a large excess of ozone in 1 bar of air. To avoid unwanted secondary chemistry isopropanol was added to scavenge both HO radicals and stabilized Criegee intermediates which are formed in the system. A rate constant ratio of  $k(\text{O}_3 + \text{Z-CF}_3\text{CH=CHCF}_3) / k(\text{O}_3 + \text{CF}_3\text{CCl=CH}_2) = 0.043$  was measured and was combined with  $k(\text{O}_3 + \text{CF}_3\text{CCl=CH}_2) = 3.54 \times 10^{-21} \text{ cm}^3 \text{ molecule}^{-1} \text{ s}^{-1}$  (McGillen et al. 2023) to give  $k(\text{O}_3 + \text{Z-CF}_3\text{CH=CHCF}_3) = (7.63 \pm 1.53) \times 10^{-22} \text{ cm}^3 \text{ molecule}^{-1} \text{ s}^{-1}$ .
- 2944
- 2945
- 2946
- 2947
- 2948
- 2949

2950 **Preferred Values**

| Parameter                                                        | Value                    | T/K |
|------------------------------------------------------------------|--------------------------|-----|
| <i>k</i> /cm <sup>3</sup> molecule <sup>-1</sup> s <sup>-1</sup> | 7.09 × 10 <sup>-22</sup> | 298 |
| <i>Reliability</i>                                               |                          |     |
| Δ log <i>k</i>                                                   | 0.08                     | 298 |

2951 **Comments on Preferred Values**

2952

2953 The results from the absolute rate study by Østerstrøm et al. (2017) and the relative rate study by

2954 McGillen et al. (2023) are in good agreement. The preferred value is an average from the two studies.

2955 The upper limit of  $k < 6 \times 10^{-21} \text{ cm}^3 \text{ molecule}^{-1} \text{ s}^{-1}$  reported by Baasandorj et al. (2011) is consistent with

2956 the preferred value. McGillen et al. (2023) observed the formation of CF<sub>3</sub>H in a yield of 0.42 ± 0.02

2957 % and showed that this is formed via the hot acid mechanism.

2958

2959

2960

2961

2962

## References

2963

2964

Baasandorj, M.; Ravishankara, A. R.; and Burkholder, J. B.: *J. Phys. Chem. A*, 115, 10539–10549, 2011.

2966

McGillen, M. R.; Zachary, T. P.; Fried, M.; Khan, A. H.; Kuwata, K. T.; Martin, C. M.; O'Doherty, S.;

2967

Pecere, F.; Shallcross, D. E.; Stanley, K. M.; and Zhang, K.: *Proc. Nat. Acad. Sci.*, 120, e2312714120,

2968

2023.

2969

Østerstrøm, F. F.; Andersen, S. T.; Sølling, T. I.; Nielsen, O. J.; and Sulbæk Andersen, M. P.: *Phys.*

2970

*Chem. Chem. Phys.* 19, 735–750, 2017.

2971

2972 **oClOx97: O<sub>3</sub> + CH<sub>2</sub>=CHCl**  
2973 Last evaluated: June 2025; Last change in preferred values: June 2017.

2974 **O<sub>3</sub> + CH<sub>2</sub>=CHCl → products**

2975 **Rate coefficient data**

| <i>k</i> /cm <sup>3</sup> molecule <sup>-1</sup> s <sup>-1</sup> | Temp./K | Reference           | Technique/ Comments |
|------------------------------------------------------------------|---------|---------------------|---------------------|
| <i>Relative Rate Coefficients</i>                                |         |                     |                     |
| ~ 2.3 × 10 <sup>-19</sup>                                        | 305     | Gay et al. (1976)   | S-FTIR (a)          |
| (2.45 ± 0.45) × 10 <sup>-19</sup>                                | 298     | Zhang et al. (1983) | S-FTIR (b)          |

2979 **Comments**

2980  
2981  
2982(a) A mixture of approximately 5 ppm of O<sub>3</sub> and 3 ppm of CH<sub>2</sub>=CHCl in 1 atmosphere of air at 305 K was  
2983 prepared and monitored for 4 hours. A rate coefficient of  $k(\text{O}_3 + \text{CH}_2=\text{CHCl}) = 0.34 \text{ ppm}^{-1} \text{ min}^{-1}$  was  
2984 estimated from the rate of loss of CH<sub>2</sub>=CHCl.

2985(b) The loss of CH<sub>2</sub>=CHCl in the presence of O<sub>3</sub> in 1 atmosphere of N<sub>2</sub> or air diluent was monitored by FTIR  
2986 spectroscopy. CH<sub>3</sub>CHO was added as a scavenger for Cl atoms formed in the oxidation of CH<sub>2</sub>=CHCl.  
2987 Initial concentrations of CH<sub>2</sub>=CHCl were 12-14 mTorr and O<sub>3</sub> were 12-71 mTorr.

2988 **Preferred Values**

| Parameter                                                        | Value                   | T/K |
|------------------------------------------------------------------|-------------------------|-----|
| <i>k</i> /cm <sup>3</sup> molecule <sup>-1</sup> s <sup>-1</sup> | 2.5 × 10 <sup>-19</sup> | 298 |
| <i>Reliability</i>                                               |                         |     |
| Δ log <i>k</i>                                                   | 0.2                     | 298 |

2991 *Comments on Preferred Values*

2992  
2993  
2994 The preferred value is based upon the study by Zhang et al. (1983) which is in good agreement  
2995 with the earlier work by Gay et al. (1976).

2996 **References**

2997  
2998  
2999 Gay, B. W., Hanst, P. L., and Noonan, R. C.: Environ. Sci. Technol., 10, 58, 1976.

3000 Zhang, J., Hatakeyama, S., and Akimoto, H.: Int. J. Chem. Kinet., 15 655, 1983.  
3001

3002 **oFOx132: O<sub>3</sub> + *E*-CF<sub>3</sub>CH=CHCl (HCFO-1233zd(E))**

3003 Last evaluated: June 2025; last change in preferred values: June 2019.

3004

3005 **O<sub>3</sub> + *E*-CF<sub>3</sub>CH=CHCl (HCFO-1233zd(E)) → products**

3006

3007

3008

3009

**Rate coefficient data**

| <i>k</i> /cm <sup>3</sup> molecule <sup>-1</sup> s <sup>-1</sup> | Temp./K | Reference                      | Technique/ Comments |
|------------------------------------------------------------------|---------|--------------------------------|---------------------|
| <i>Relative Rate Coefficients</i>                                |         |                                |                     |
| (1.46 ± 0.12) × 10 <sup>-21</sup>                                | 296     | Sulbaek Andersen et al. (2008) | S-FTIR (a)          |

3010

3011

3012

**Comments**

3013 (a) The decay of *E*-CF<sub>3</sub>CH=CHCl was monitored by FTIR spectroscopy when exposed to ozone.  
 3014 Reaction mixtures consisted of 5.9-14.2 mTorr *E*-CF<sub>3</sub>CH=CHCl, 14.0-30.6 mTorr cyclohexane,  
 3015 and 414–4360 mTorr O<sub>3</sub> in 700 Torr (933 mbar) of air diluent. Cyclohexane was added to avoid  
 3016 potential problems associated with the loss of *E*-CF<sub>3</sub>CH=CHCl via reaction with OH radicals  
 3017 formed in the reaction system. The loss of *E*-CF<sub>3</sub>CH=CHCl followed first order kinetics and the  
 3018 pseudo first order rate coefficients increased linearly with [O<sub>3</sub>].

3019

3020

3021

**Preferred Values**

| Parameter                                                        | Value                   | <i>T</i> /K |
|------------------------------------------------------------------|-------------------------|-------------|
| <i>k</i> /cm <sup>3</sup> molecule <sup>-1</sup> s <sup>-1</sup> | 1.5 × 10 <sup>-21</sup> | 298         |
| <i>Reliability</i>                                               |                         |             |
| Δ log <i>k</i>                                                   | 0.15                    | 298         |

3022

3023

*Comments on Preferred Values*

3025 The recommended value is taken from the work by Sulbaek Andersen et al. (2008); the only study of  
 3026 this reaction.

3027

3028

3029

**References**

3030 Sulbaek Andersen, M. P., Nilsson, E. J. K., Nielsen, O. J., Johnson, M. S., Hurley, M. D., and  
 3031 Wallington, T. J.: J. Photochem. and Photobiol. A: Chem., 199, 92, 2008.

3032

3033 **oFOx131: O<sub>3</sub> + Z-CF<sub>3</sub>CH=CHCl (HCFO-1233zd(Z))**

3034 Last evaluated: June 2025; last change in preferred values: June 2019.

3035

3036

3037

3038

3039

3040

3041

**O<sub>3</sub> + Z-CF<sub>3</sub>CH=CHCl (HCFO-1233zd(Z)) → products**

**Rate coefficient data**

| <i>k</i> /cm <sup>3</sup> molecule <sup>-1</sup> s <sup>-1</sup> | Temp./K | Reference              | Technique/ Comments |
|------------------------------------------------------------------|---------|------------------------|---------------------|
| <i>Relative Rate Coefficients</i>                                |         |                        |                     |
| (1.53 ± 0.12) × 10 <sup>-21</sup>                                | 296     | Andersen et al. (2015) | S-FTIR (a)          |

3042

3043

3044

**Comments**

3045

3046

3047

3048

3049

3050

3051

3052

3053

- (a) The decay of Z-CF<sub>3</sub>CH=CHCl was monitored by FTIR spectroscopy when exposed to ozone. Reaction mixtures consisted of 4.07-4.17 mTorr Z-CF<sub>3</sub>CH=CHCl, 3.96-31.79 mTorr cyclohexane, and 610–2820 mTorr O<sub>3</sub> in 700 Torr of air diluent. Cyclohexane was added to avoid potential problems associated with the loss of Z-CF<sub>3</sub>CH=CHCl via reaction with OH radicals formed in the reaction system. The loss of Z-CF<sub>3</sub>CH=CHCl followed first order kinetics and the pseudo first order rate coefficients increased linearly with [O<sub>3</sub>].

**Preferred Values**

| Parameter                                                        | Value                    | T/K |
|------------------------------------------------------------------|--------------------------|-----|
| <i>k</i> /cm <sup>3</sup> molecule <sup>-1</sup> s <sup>-1</sup> | 1.53 × 10 <sup>-21</sup> | 298 |
| <i>Reliability</i>                                               |                          |     |
| Δ log <i>k</i>                                                   | 0.15                     | 298 |

3054

3055

3056

3057

3058

3059

3060

3061

3062

3063

3064

*Comments on Preferred Values*

The recommended value is taken from the work by Andersen et al. (2015); the only study of this reaction.

**References**

Andersen, L. L., Østerstrøm, F. F., Sulbaek Andersen, M. P., Nielsen, O. J., and Wallington, T. J.: Chem. Phys. Lett., 639, 289, 2015.

3065 **oFOx125: O<sub>3</sub> + CF<sub>3</sub>CCl=CH<sub>2</sub> (HCFO-1233xf)**

3066 Last evaluated: June 2025; last change in preferred values: June 2024.

3067

3068

3069

3070

3071

3072

3073

**O<sub>3</sub> + CF<sub>3</sub>CCl=CH<sub>2</sub> (HCFO-1233xf) → products****Rate coefficient data**

| <i>k</i> /cm <sup>3</sup> molecule <sup>-1</sup> s <sup>-1</sup> | Temp./K | Reference              | Technique/ Comments |
|------------------------------------------------------------------|---------|------------------------|---------------------|
| <i>Absolute Rate Coefficients</i>                                |         |                        |                     |
| (3.00 ± 0.74) × 10 <sup>-21</sup>                                | 296     | McGillen et al. (2023) | S-UV (a)            |
| <i>Relative Rate Coefficients</i>                                |         |                        |                     |
| (3.86 ± 0.79) × 10 <sup>-21</sup>                                | 296     | McGillen et al. (2023) | RR (b)              |
| (3.82 ± 0.78) × 10 <sup>-21</sup>                                | 296     | McGillen et al. (2023) | RR (c)              |
| (3.95 ± 0.87) × 10 <sup>-21</sup>                                | 296     | McGillen et al. (2023) | RR (d)              |
| (3.15 ± 0.87) × 10 <sup>-21</sup>                                | 296     | McGillen et al. (2023) | RR (e)              |

3074

3075

3076

**Comments**

3077

3078

3079

3080

3081

3082

3083

3084

3085

3086

3087

3088

3089

3090

3091

3092

3093

3094

3095

3096

3097

3098

3099

3100

3101

3102

3103

- (a) The decay of ozone was monitored via UV absorption in the presence of an excess of CF<sub>3</sub>CCl=CH<sub>2</sub> in the presence of either *i*-propanol or cyclohexane and HC(O)OH which were added as scavengers for HO radicals and stabilized Criegee intermediates. The diluent and pressure was 1 atmosphere of air (McGillen, private communication). The loss of O<sub>3</sub> followed first-order kinetics and the pseudo first-order rate coefficients increased linearly with [CF<sub>3</sub>CCl=CH<sub>2</sub>].
- (b) The decay of CF<sub>3</sub>CCl=CH<sub>2</sub> was measured relative to that of HFO-1243zf (CF<sub>3</sub>CH=CH<sub>2</sub>) in the presence of a large excess of ozone in 1 bar of air. To avoid unwanted secondary chemistry isopropanol was added to scavenge both HO radicals and stabilized Criegee intermediates which are formed in the system. A rate constant ratio of  $k(\text{O}_3+\text{CF}_3\text{CCl}=\text{CH}_2)/k(\text{O}_3+\text{CF}_3\text{CH}=\text{CH}_2) = 0.307$  was measured and was combined with  $k(\text{O}_3+\text{CF}_3\text{CH}=\text{CH}_2) = 1.26 \times 10^{-20} \text{ cm}^3 \text{ molecule}^{-1} \text{ s}^{-1}$  (McGillen et al. 2023) to give  $k(\text{O}_3+\text{CF}_3\text{CCl}=\text{CH}_2) = (3.86 \pm 0.79) \times 10^{-21} \text{ cm}^3 \text{ molecule}^{-1} \text{ s}^{-1}$ .
- (c) The decay of CF<sub>3</sub>CCl=CH<sub>2</sub> was measured relative to that of HFO-1234yf (CF<sub>3</sub>CF=CH<sub>2</sub>) in the presence of a large excess of ozone in 1 bar of air. To avoid unwanted secondary chemistry isopropanol was added to scavenge both HO radicals and stabilized Criegee intermediates which are formed in the system. A rate constant ratio of  $k(\text{O}_3+\text{CF}_3\text{CCl}=\text{CH}_2)/k(\text{O}_3+\text{CF}_3\text{CF}=\text{CH}_2) = 1.495$  was measured and was combined with  $k(\text{O}_3+\text{CF}_3\text{CF}=\text{CH}_2) = 2.56 \times 10^{-21} \text{ cm}^3 \text{ molecule}^{-1} \text{ s}^{-1}$  (McGillen et al. 2023) to give  $k(\text{O}_3+\text{CF}_3\text{CCl}=\text{CH}_2) = (3.82 \pm 0.78) \times 10^{-21} \text{ cm}^3 \text{ molecule}^{-1} \text{ s}^{-1}$ .
- (d) The decay of CF<sub>3</sub>CCl=CH<sub>2</sub> was measured relative to that of HFO-1243ze(*E*) (*E*-CF<sub>3</sub>CH=CHF) in the presence of a large excess of ozone in 1 bar of air. To avoid unwanted secondary chemistry isopropanol was added to scavenge both HO radicals and stabilized Criegee intermediates which are formed in the system. A rate constant ratio of  $k(\text{O}_3+\text{CF}_3\text{CCl}=\text{CH}_2)/k(\text{O}_3+\textit{E}\text{-CF}_3\text{CH}=\text{CHF}) = 1.619$  was measured and was combined with  $k(\text{O}_3+\textit{E}\text{-CF}_3\text{CH}=\text{CHF}) = 2.44 \times 10^{-21} \text{ cm}^3 \text{ molecule}^{-1} \text{ s}^{-1}$  (McGillen et al. 2023) to give  $k(\text{O}_3+\text{CF}_3\text{CCl}=\text{CH}_2) = (3.95 \pm 0.87) \times 10^{-21} \text{ cm}^3 \text{ molecule}^{-1} \text{ s}^{-1}$ .
- (e) The decay of CF<sub>3</sub>CCl=CH<sub>2</sub> was measured relative to that of HFO-1336mzz(*Z*) (*Z*-CF<sub>3</sub>CH=CHCF<sub>3</sub>) in the presence of a large excess of ozone in 1 bar of air. To avoid unwanted

3104 secondary chemistry isopropanol was added to scavenge both HO radicals and stabilized Criegee  
 3105 intermediates which are formed in the system. A rate constant ratio of  $k(\text{O}_3+\text{CF}_3\text{CCl}=\text{CH}_2)/k(\text{O}_3+$   
 3106  $\text{Z-CF}_3\text{CH}=\text{CHCF}_3) = 4.624$  was measured and was combined with  $k(\text{O}_3+ \text{Z-CF}_3\text{CH}=\text{CHCF}_3) =$   
 3107  $6.81 \times 10^{-22} \text{ cm}^3 \text{ molecule}^{-1} \text{ s}^{-1}$  (McGillen et al. 2023) to give  $k(\text{O}_3+\text{CF}_3\text{CCl}=\text{CH}_2) = (3.15 \pm 0.87)$   
 3108  $\times 10^{-21} \text{ cm}^3 \text{ molecule}^{-1} \text{ s}^{-1}$ .

### 3111 Preferred Values

| 3112 | Parameter                                              | Value                  | T/K |
|------|--------------------------------------------------------|------------------------|-----|
|      | $k / \text{cm}^3 \text{ molecule}^{-1} \text{ s}^{-1}$ | $3.00 \times 10^{-21}$ | 298 |
|      | <i>Reliability</i>                                     |                        |     |
|      | $\Delta \log k$                                        | 0.08                   | 298 |

3113

3114

### 3115 *Comments on Preferred Values*

3116

3117 The preferred value is taken from the absolute rate study by McGillen et al. (2023). Results from the  
 3118 relative rate studies by McGillen et al. (2023) are consistent with the preferred value. McGillen et al.  
 3119 (2023) did not observe formation of  $\text{CF}_3\text{Cl}$  and  $\text{CF}_3\text{H}$  as products.

3120

3121

### References

3122

3123 McGillen, M. R.; Zachary, T. P.; Fried, M.; Khan, A. H.; Kuwata, K. T.; Martin, C. M.; O'Doherty,  
 3124 S.; Pecere, F.; Shallcross, D. E.; Stanley, K. M.; and Zhang, K.: Proc. Soc. Nat. Acad., 120,  
 3125 e2312714120, 2023.

3126

3127 **oFOx84: HO + CH<sub>2</sub>FCH<sub>2</sub>OH**  
 3128 Last evaluated: June 2025; Last change in preferred values: June 2023.

3129

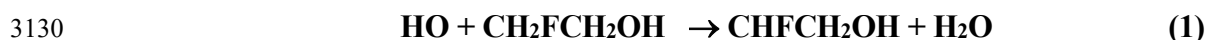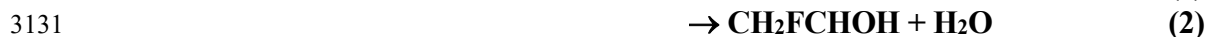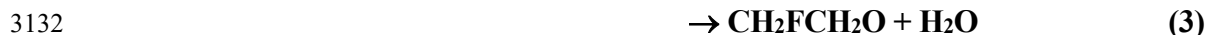

3133

3134 **Rate coefficient data ( $k = k_1 + k_2 + k_3$ )**

3135

| $k/\text{cm}^3 \text{ molecule}^{-1} \text{ s}^{-1}$    | $T/\text{K}$ | Reference               | Technique/ Comments |
|---------------------------------------------------------|--------------|-------------------------|---------------------|
| <i>Absolute Rate Coefficients</i>                       |              |                         |                     |
| $(5.15 \pm 0.88) \times 10^{-12} \exp[-(330 \pm 45)/T]$ | 238-355      | Rajakumar et al. (2005) | PLP-LIF (a)         |
| $(1.63 \pm 0.09) \times 10^{-12}$                       | 297          |                         |                     |
| $3.47 \times 10^{-14} (T/298)^{4.49} \exp(977/T)$       | 230-370      | Orkin et al. (2011)     | FP-RF (b)           |
| $(9.29 \pm 0.18) \times 10^{-13}$                       | 298          |                         |                     |
| <i>Relative Rate Coefficients</i>                       |              |                         |                     |
| $(1.39 \pm 0.05) \times 10^{-12}$                       | 298          | Sellevåg et al. (2004)  | RR (c)              |

3136

3137

3138

### Comments

3139 (a) HO radicals were generated by the 248 nm photolysis of H<sub>2</sub>O<sub>2</sub> in 60-100 Torr (80-133 mbar) of  
 3140 helium diluent. Additional experiments were performed at 355 K using DO radicals (formed via O<sub>3</sub>  
 3141 photolysis in the presence of D<sub>2</sub>O). The rate coefficients for the reactions of DO and HO radicals  
 3142 with CH<sub>2</sub>FCH<sub>2</sub>OH were indistinguishable. There was no evidence for the formation of HO radicals  
 3143 following reaction of DO radicals with CH<sub>2</sub>FCH<sub>2</sub>OH.

3144 (b) HO radicals were generated by the flash photolysis of H<sub>2</sub>O in 1.33-26.7 kPa (10-200 Torr) of argon  
 3145 diluent. The rate coefficients were independent of the H<sub>2</sub>O concentration, flash energy, flash  
 3146 repetition rate, residence time of the mixture in the reactor, reactant concentration in the storage  
 3147 bulb, and residence time of the reactant mixture in the delivery volume.

3148 (c) HO radicals were generated by the photolysis of O<sub>3</sub> in the presence of H<sub>2</sub>O in 1013 mbar of air  
 3149 diluent at 298 K. A rate coefficient ratio of  $k(\text{HO} + \text{CH}_2\text{FCH}_2\text{OH})/k(\text{HO} + \text{C}_2\text{H}_6) = 5.81 \pm 0.19$  was  
 3150 measured. Placing this on an absolute basis using  $k(\text{HO} + \text{C}_2\text{H}_6) = 2.4 \times 10^{-13}$  (Atkinson et al., 2006)  
 3151 gives  $k(\text{HO} + \text{CH}_2\text{FCH}_2\text{OH}) = (1.39 \pm 0.05) \times 10^{-12} \text{ cm}^3 \text{ molecule}^{-1} \text{ s}^{-1}$ .

3152

3153

3154

### Preferred Values

| Parameter                                            | Value                               | T/K     |
|------------------------------------------------------|-------------------------------------|---------|
| $k/\text{cm}^3 \text{ molecule}^{-1} \text{ s}^{-1}$ | $9.12 \times 10^{-13}$              | 298     |
| $k/\text{cm}^3 \text{ molecule}^{-1} \text{ s}^{-1}$ | $2.23 \times 10^{-12} \exp(-266/T)$ | 230-300 |
| <i>Reliability</i>                                   |                                     |         |
| $\Delta \log k$                                      | $\pm 0.08$                          | 298     |
| $\Delta E/R$                                         | $\pm 100$                           | 230-300 |

3157

### Comments on Preferred Values

3158

3159 The results from the relative rate study by Sellevåg et al. (2004) and the absolute rate study of  
 3160 Rajakumar et al. (2005) at ambient temperature are indistinguishable within the likely combined  
 3161 experimental uncertainties. The results from the absolute rate study by Orkin et al. (2011) are  
 3162 approximately a factor of 2 lower. The concentration of CH<sub>2</sub>FCH<sub>2</sub>OH in the study by Rajakumar et al.  
 3163

3164 was measured using absorption at 184.9 nm. Orkin et al. remeasured the absorption spectrum of  
 3165 CH<sub>2</sub>FCH<sub>2</sub>OH and determined an absorption cross section at 184.9 nm that was 1.82 times smaller than  
 3166 used by Rajakumar et al. (2005). Correction of the rate coefficients reported by Rajakumar et al. by a  
 3167 factor of 1.82 brings them into good agreement with those from Orkin et al. (2011). A fit of the  
 3168 modified Arrhenius expression  $k = CT^2 \exp(-D/T)$ , to the combined data set from Orkin et al. (2011)  
 3169 and the corrected data from Rajakumar et al. (2005) gives  $k = 4.28 \times 10^{-18} T^2 \exp(264/T) \text{ cm}^3$   
 3170  $\text{molecule}^{-1} \text{ s}^{-1}$  over the temperature range 230-370 K. The preferred Arrhenius expression  $k = 2.23 \times$   
 3171  $10^{-12} \exp(-266/T)$ , is centered at 265 K and is derived from the three-parameter equation with  $A = C e^2$   
 3172  $T^2$  and  $B = D + 2T$ .

### 3173 References

- 3176 Atkinson, R., Baulch, D. L., Cox, R. A., Crowley, J. N., Hampson, R. F., Hynes, R. G., Jenkin, M. E.,  
 3177 Rossi, M. J., and Troe, J.: Atmos. Chem. Phys., 6, 3625, 2006; IUPAC Subcommittee for Gas Kinetic  
 3178 Data Evaluation, <https://iupac.aeris-data.fr/>.  
 3179 Orkin, V. L., Khamaganov, V. G., Martynova, L. E., and Kurylo, M. J.: J. Phys. Chem. A, 115, 8556,  
 3180 2011.  
 3181 Rajakumar, B., Burkholder, J. B., Portmann, R. W., and Ravishankara, A.R.: Phys. Chem. Chem. Phys.,  
 3182 7, 2498, 2005.  
 3183 Sellevåg, S. R., Nielsen, C. J., Søvde, O. A., Myhre, G., Sundet, J. K., Stordal, F., and Isaksen, I. S. A.:  
 3184 Atmos. Environ., 38, 6725, 2004.

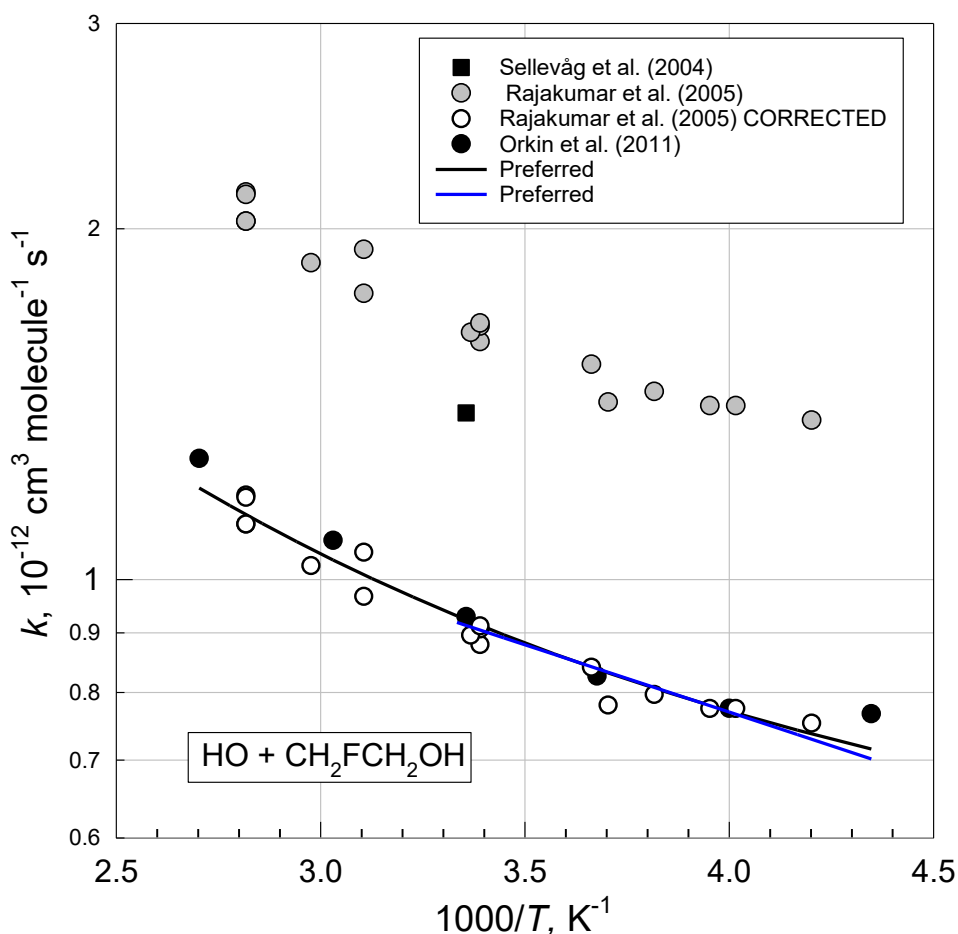

3185  
 3186

3189  
 3190  
 3191  
 3192  
 3193  
 3194  
 3195

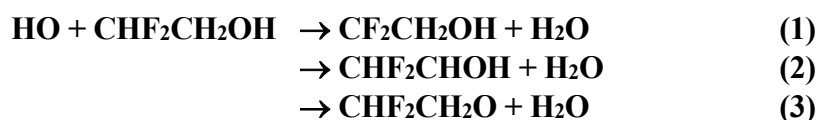

**Rate coefficient data ( $k = k_1 + k_2 + k_3$ )**

| $k/\text{cm}^3 \text{ molecule}^{-1} \text{ s}^{-1}$ | $T/\text{K}$ | Reference              | Technique/ Comments |
|------------------------------------------------------|--------------|------------------------|---------------------|
| <i>Absolute Rate Coefficients</i>                    |              |                        |                     |
| $(2.52 \pm 0.44) \times 10^{-13}$                    | 300          | Kovacs et al. (2005)   | PLP-RF (a)          |
| $3.87 \times 10^{-14} (T/298)^{4.25} \exp(578/T)$    | 220-370      | Orkin et al. (2011)    | FP-RF (b)           |
| $(2.70 \pm 0.02) \times 10^{-13}$                    | 298          |                        |                     |
| <i>Relative Rate Coefficients</i>                    |              |                        |                     |
| $(4.57 \pm 0.38) \times 10^{-13}$                    | 298          | Sellevåg et al. (2004) | RR (c)              |

3196  
 3197  
 3198  
 3199  
 3200  
 3201  
 3202  
 3203  
 3204  
 3205  
 3206  
 3207  
 3208  
 3209  
 3210

**Comments**

- (a) HO radicals were produced by the photolysis of HNO<sub>3</sub> at 248 nm in 105 ± 5 mbar of helium diluent.  
 (b) HO radicals were generated by the flash photolysis of H<sub>2</sub>O in 1.33-26.7 kPa (10-200 Torr) of argon. The rate coefficient was independent of the H<sub>2</sub>O concentration, flash energy, flash repetition rate, residence time of the mixture in the reactor, reactant concentration in the storage bulb, and residence time of the reactant mixture in the delivery volume.  
 (c) HO radicals were generated by the photolysis of O<sub>3</sub> in the presence of H<sub>2</sub>O in 1013 mbar of air diluent at 298 K. A rate coefficient ratio of  $k(\text{HO}+\text{CHF}_2\text{CH}_2\text{OH})/k(\text{HO}+\text{C}_2\text{H}_6) = 1.903 \pm 0.016$  was measured. Placing this on an absolute basis using  $k(\text{HO}+\text{C}_2\text{H}_6) = 2.4 \times 10^{-13}$  (Atkinson et al., 2006) gives  $k(\text{HO}+\text{CHF}_2\text{CH}_2\text{OH}) = (4.57 \pm 0.38) \times 10^{-13} \text{ cm}^3 \text{ molecule}^{-1} \text{ s}^{-1}$ .

**Preferred Values**

| Parameter                                              | Value                               | $T/\text{K}$ |
|--------------------------------------------------------|-------------------------------------|--------------|
| $k / \text{cm}^3 \text{ molecule}^{-1} \text{ s}^{-1}$ | $2.61 \times 10^{-13}$              | 298          |
| $k / \text{cm}^3 \text{ molecule}^{-1} \text{ s}^{-1}$ | $1.63 \times 10^{-12} \exp(-545/T)$ | 220-300      |
| <i>Reliability</i>                                     |                                     |              |
| $\Delta \log k$                                        | ± 0.08                              | 298          |
| $\Delta E/R$                                           | ± 200                               | 220-300      |

3213  
 3214  
 3215  
 3216  
 3217  
 3218  
 3219  
 3220  
 3221  
 3222  
 3223  
 3224

*Comments on Preferred Values*

The results from the absolute rate studies at ambient temperature by Kovacs et al. (2005) and Orkin et al. (2011) are in excellent agreement. For reasons which are unclear the rate coefficient reported in the relative rate study by Sellevåg et al. (2004) is approximately 80% larger than those from the two absolute rate studies. The preferred value of  $k = 2.61 \times 10^{-13} \text{ cm}^3 \text{ molecule}^{-1} \text{ s}^{-1}$  at 298 K is an average of the ambient temperature measurements by Kovacs et al. (2005) and Orkin et al. (2011). There is small, but discernable, curvature in the Arrhenius plot evident in the data from Orkin et al. (2011). A fit of the modified Arrhenius expression  $k = CT^2 \exp(-D/T)$ , to the combined data set from Kovacs et al. (2005) and Orkin et al. (2011) gives  $k = 3.44 \times 10^{-18} T^2 \exp(-35/T) \text{ cm}^3 \text{ molecule}^{-1} \text{ s}^{-1}$  over the temperature range 220-370 K. The preferred Arrhenius expression  $k = A \exp(-B/T)$  is centered at 255 K and was

3225 derived using  $B = D + 2T$  with the value of  $A$  adjusted to give the preferred  $k(298\text{K})$  value;  $k = 1.63 \times$   
3226  $10^{-12} \exp(-545/T) \text{ cm}^3 \text{ molecule}^{-1} \text{ s}^{-1}$ .

3227

3228

3229

### References

3230 Atkinson, R., Baulch, D. L., Cox, R. A., Crowley, J. N., Hampson, R. F., Hynes, R. G., Jenkin, M. E.,  
3231 Rossi, M. J., and Troe, J.: *Atmos. Chem. Phys.*, 6, 3625, 2006; Task Group on Atmospheric  
3232 Chemical Kinetic Data Evaluation, <https://iupac.aeris-data.fr/>.

3233 Kovacs, G., Szasz-Vadasz, T., Papadimitriou, V. C., Dóbe, S., Bérces, T., and Marta F.: *React. Kinet.*  
3234 *Catal. Lett.*, 87, 129, 2005.

3235 Orkin, V. L., Khamaganov, V. G., Martynova, L. E., and Kurylo, M. J.: *J. Phys. Chem. A*, 115, 8556,  
3236 2011.

3237 Sellevåg, S. R., Nielsen, C. J., Søvde, O. A., Myhre, G., Sundet, J. K., Stordal, F., and Isaksen, I. S. A.:  
3238 *Atmos. Environ.*, 38, 6725, 2004.

3239

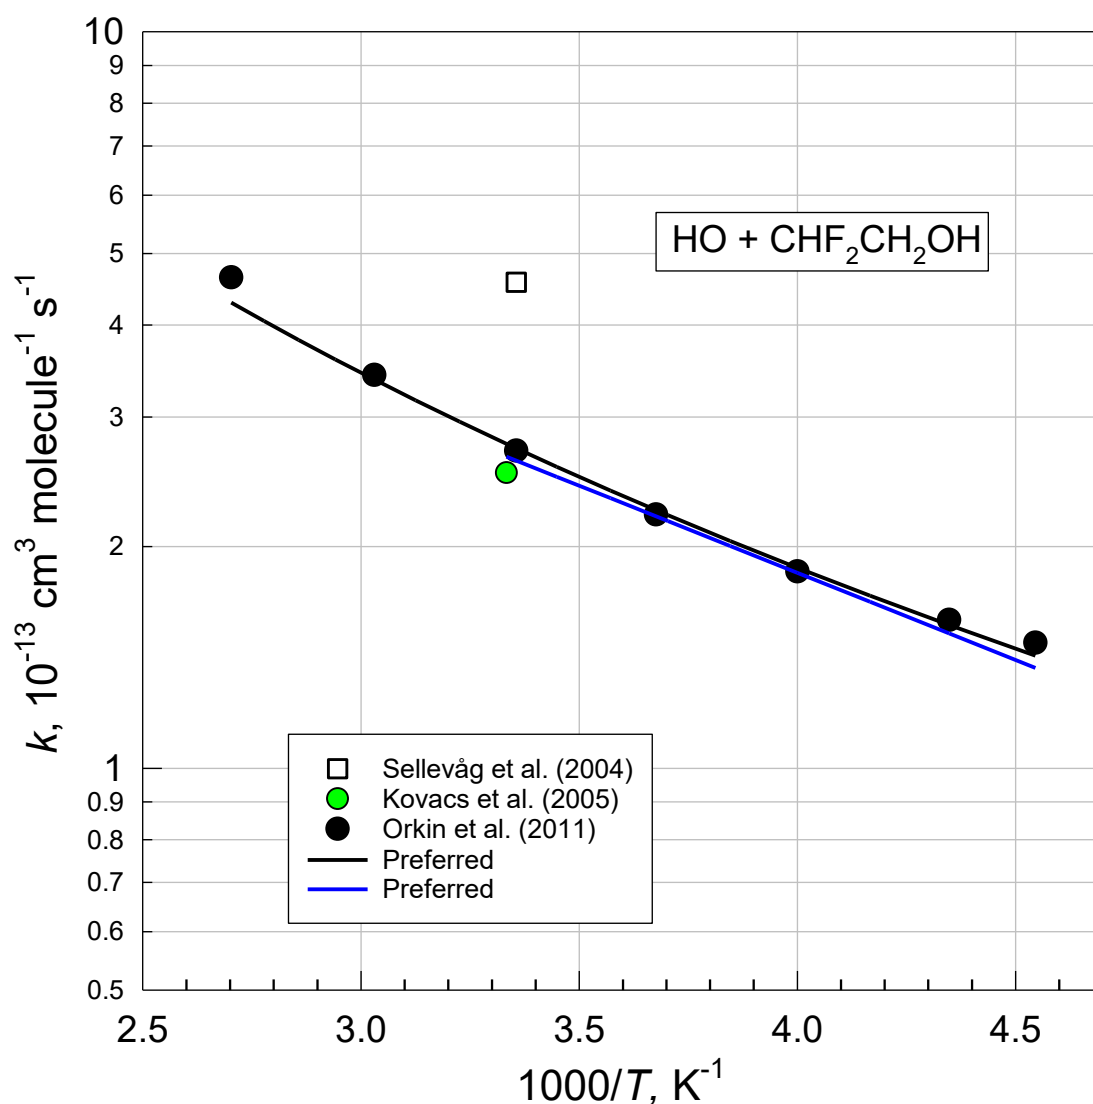

3240

3241

3244  
 3245  
 3246  
 3247  
 3248  
 3249

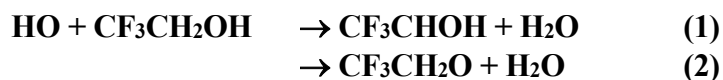

**Rate coefficient data ( $k = k_1 + k_2$ )**

| $k/\text{cm}^3 \text{ molecule}^{-1} \text{ s}^{-1}$    | $T/\text{K}$ | Reference                | Technique/<br>Comments |
|---------------------------------------------------------|--------------|--------------------------|------------------------|
| <i>Absolute Rate Coefficients</i>                       |              |                          |                        |
| $(9.55 \pm 0.71) \times 10^{-14}$                       | 298          | Wallington et al. (1988) | FP-RF (a)              |
| $(2.00 \pm 0.37) \times 10^{-12} \exp[-(890 \pm 60)/T]$ | 250-430      | Tokuhashi et al. (1999)  | LP-LIF (b)             |
| $1.01 \times 10^{-13}$                                  | 298          |                          | FP-LIF (b)             |
|                                                         |              |                          | DF-LIF (b)             |
| $(1.06 \pm 0.30) \times 10^{-13}$                       | 300          | Kovacs et al. (2005)     | PLP-RF (c)             |
| $(1.23 \times 10^{-12} \exp[-(760 \pm 340)/T])$         | 298-363      | Indulkar et al. (2011)   | LP-LIF (d)             |
| $(1.03 \pm 0.11) \times 10^{-13}$                       | 298          |                          |                        |
| $2.48 \times 10^{-14} (T/298)^{4.03} \exp(418/T)$       | 220-370      | Orkin et al. (2011)      | FP-RF (e)              |
| $(1.01 \pm 0.01) \times 10^{-13}$                       | 298          |                          |                        |
| <i>Relative Rate Coefficients</i>                       |              |                          |                        |
| $(1.31 \pm 0.05) \times 10^{-13}$                       | 298          | Sellevåg et al. (2004)   | RR (f)                 |
| $(9.4 \pm 0.8) \times 10^{-14}$                         | 296          | Hurley et al. (2004)     | RR (g)                 |

3250  
 3251  
 3252

**Comments**

- 3253 (a) HO radicals were generated by the photolysis ( $\lambda \geq 165 \text{ nm}$ ) of H<sub>2</sub>O in 25-50 Torr (33-67 mbar) of  
 3254 argon diluent at 298 K.
- 3255 (b) Three different absolute rate methods were employed by Tokuhashi et al. (1999): LP-LIF, FP-LIF,  
 3256 and DF-LIF. HO radicals in the LP-LIF experiments were generated by the 193 nm photolysis of  
 3257 N<sub>2</sub>O to produce O(<sup>1</sup>D) atoms in the presence of H<sub>2</sub>O in 15-70 Torr (20-93 mbar) of helium diluent.  
 3258 HO radicals in the FP-LIF experiments were generated by the photolysis (Xe flash lamp,  $\lambda < 180$   
 3259 nm) of H<sub>2</sub>O in argon diluent. HO radicals in the DF-LIF experiments were generated by the reaction  
 3260 of H atoms with NO<sub>2</sub> in 4-6 Torr (5-8 mbar) of argon diluent. There was good agreement between  
 3261 the results from experiments using the three different techniques. The value at 298 K cited above is  
 3262 the average obtained using the different techniques.
- 3263 (c) HO radicals were produced by the photolysis of HNO<sub>3</sub> at 248 nm in  $105 \pm 5$  mbar of helium diluent.
- 3264 (d) HO radicals were produced by the photolysis of H<sub>2</sub>O<sub>2</sub> at 248 nm.
- 3265 (e) HO radicals were generated by the flash photolysis of H<sub>2</sub>O in 1.33-26.7 kPa (10-200 Torr) of argon  
 3266 diluent. The rate coefficient was independent of the H<sub>2</sub>O concentration, flash energy, flash repetition  
 3267 rate, residence time of the mixture in the reactor, reactant concentration in the storage bulb, and  
 3268 residence time of the reactant mixture in the delivery volume.
- 3269 (f) HO radicals were generated by the photolysis of O<sub>3</sub> in the presence of H<sub>2</sub>O in 1013 mbar of air  
 3270 diluent at 298 K. A rate coefficient ratio of  $k(\text{HO}+\text{CF}_3\text{CH}_2\text{OH})/k(\text{HO}+\text{C}_2\text{H}_6) = 0.547 \pm 0.019$  was  
 3271 measured. Placing this on an absolute basis using  $k(\text{HO}+\text{C}_2\text{H}_6) = 2.4 \times 10^{-13}$  (Atkinson et al., 2006)  
 3272 gives  $k(\text{HO}+\text{CF}_3\text{CH}_2\text{OH}) = (1.31 \pm 0.05) \times 10^{-13} \text{ cm}^3 \text{ molecule}^{-1} \text{ s}^{-1}$ .
- 3273 (g) HO radicals were generated by the photolysis of CH<sub>3</sub>ONO in 700 Torr (933 mbar) of air. A rate  
 3274 coefficient ratio of  $k(\text{HO}+\text{CF}_3\text{CH}_2\text{OH})/k(\text{HO}+\text{C}_2\text{H}_2) = 0.12 \pm 0.01$  was reported. Using  
 3275  $k(\text{HO}+\text{C}_2\text{H}_2) = 7.8 \times 10^{-13} \text{ cm}^3 \text{ molecule}^{-1} \text{ s}^{-1}$  (Atkinson et al., 2006) gives  $k(\text{HO}+\text{CF}_3\text{CH}_2\text{OH}) =$   
 3276  $(9.4 \pm 0.8) \times 10^{-14} \text{ cm}^3 \text{ molecule}^{-1} \text{ s}^{-1}$ .

3277  
3278  
3279

## Preferred Values

| Parameter                                            | Value                               | T/K     |
|------------------------------------------------------|-------------------------------------|---------|
| $k/\text{cm}^3 \text{ molecule}^{-1} \text{ s}^{-1}$ | $1.00 \times 10^{-13}$              | 298     |
| $k/\text{cm}^3 \text{ molecule}^{-1} \text{ s}^{-1}$ | $1.25 \times 10^{-12} \exp(-754/T)$ | 220-300 |
| <i>Reliability</i>                                   |                                     |         |
| $\Delta \log k$                                      | 0.06                                | 298     |
| $\Delta E/R$                                         | $\pm 100$                           | 220-300 |

3280  
3281*Comments on Preferred Values*3282  
3283  
3284

Except for the measurement by Sellevåg et al. (2004), there is excellent agreement in the room temperature rate coefficients reported for this reaction. The preferred value at 298 K is an average of the results from the remaining six studies. The rate coefficients reported by Indulkar et al. (2011) at 318 and 333 K are approximately 20% below those reported by Tokuhashi et al. (1999) and Orkin et al. (2011) but are within the likely combined uncertainties of the studies. The rate coefficients reported by Indulkar et al. (2011) at 348 and 363 K are in excellent agreement with those expected based on the studies by Tokuhashi et al. (1999) and Orkin et al. (2011). The temperature dependencies reported by Tokuhashi et al. (1999), Indulkar et al. (2011), and Orkin et al. (2011) over the range 250-370 K are in good agreement. There is evidence of curvature in the Arrhenius plot in the results from Orkin et al. (2011) particularly below 250 K. A fit of the modified Arrhenius expression  $k = CT^2 \exp(-D/T)$ , to the combined data set from Tokuhashi et al. (1999) and Orkin et al. (2011) gives  $k = 2.41 \times 10^{-18} T^2 \exp(-224/T) \text{ cm}^3 \text{ molecule}^{-1} \text{ s}^{-1}$  over the temperature range 220-430 K. The preferred Arrhenius expression  $k = A \exp(-B/T)$  is centered at 265 K and was derived using  $B = D + 2T$  with the value of A adjusted to give the preferred  $k(298\text{K})$  value;  $k = 1.25 \times 10^{-12} \exp(-754/T) \text{ cm}^3 \text{ molecule}^{-1} \text{ s}^{-1}$ . Hurley et al. (2004) have reported the formation of  $\text{CF}_3\text{CHO}$  in a molar yield of  $97 \pm 3\%$  following the chlorine-atom-initiated oxidation of  $\text{CF}_3\text{CH}_2\text{OH}$  in 700 Torr of air. HO and chlorine atom reaction with  $\text{CF}_3\text{CH}_2\text{OH}$  are expected to proceed via the same mechanism; hydrogen abstraction from the  $-\text{CH}_2-$  group. The HO radical initiated oxidation of  $\text{CF}_3\text{CH}_2\text{OH}$  is expected to lead to quantitative conversion of  $\text{CF}_3\text{CH}_2\text{OH}$  into  $\text{CF}_3\text{CHO}$  (Calvert et al., 2011).

3304

## References

3305  
3306

- Atkinson, R., Baulch, D. L., Cox, R. A., Crowley, J. N., Hampson, R. F., Hynes, R. G., Jenkin, M. E., Rossi, M. J., and Troe, J.: *Atmos. Chem. Phys.*, 6, 3625, 2006; IUPAC Subcommittee for Gas Kinetic Data Evaluation, <https://iupac.aeris-data.fr/>.
- Calvert, J. G., Mellouki, A., Orlando, J. J., Pilling, M., and Wallington T. J.: *The Mechanisms of Atmospheric Oxidation of the Oxygenates*, Oxford University Press, New York, NY, 2011.
- Hurley, M. D., Wallington, T. J., Andersen, M. P. S., Ellis, D. A., Martin, J. W., and Mabury, S. A.: *J. Phys. Chem. A*, 108, 1973, 2004.
- Indulkar, Y. N., SenGupta, S., Waghmode, S. B., Kumar, A., Dhanya, S., and Naik, P. D.: *Atmos. Environ.*, 45, 6973, 2011.
- Kovacs, G., Szasz-Vadasz, T., Papadimitriou, V. C., Dóbbé, S., Bérces, T., and Marta F.: *React. Kinet. Catal. Lett.*, 87, 129, 2005.
- Orkin, V. L., Khamaganov, V. G., Martynova, L. E., and Kurylo, M. J.: *J. Phys. Chem. A*, 115, 8556, 2011.
- Sellevåg, S. R., Nielsen, C. J., Søvdde, O. A., Myhre, G., Sundet, J. K., Stordal, F., and Isaksen, I. S. A.: *Atmos. Environ.*, 38, 6725, 2004.
- Tokuhashi, K., Nagai, H., Takahashi, A., Kaise, M., Kondo, S., Sekiya, A., Takahashi, M., Gotoh, Y.,

3322

3323  
3324  
3325  
3326

and Suga, A.: J. Phys. Chem. A, 103, 2664, 1999.  
Wallington, T. J., Dagaut, P., and Kurylo, M. J.: J. Phys. Chem., 92, 5024, 1988.

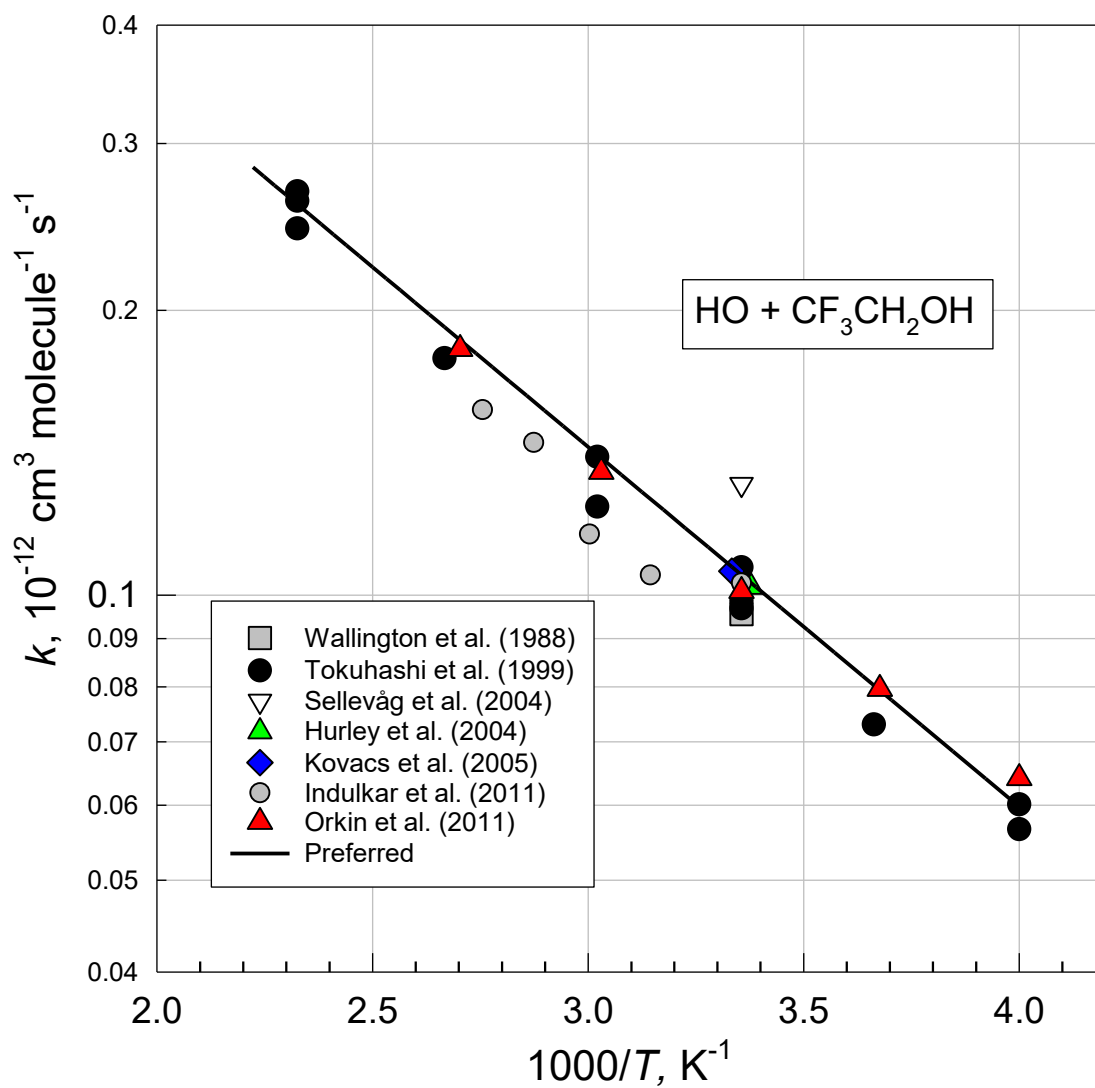

3327  
3328  
3329

3330 **oFOx87: HO + CF<sub>3</sub>CH<sub>2</sub>CH<sub>2</sub>OH**  
 3331 Last evaluated: June 2025; Last change in preferred values: June 2014.

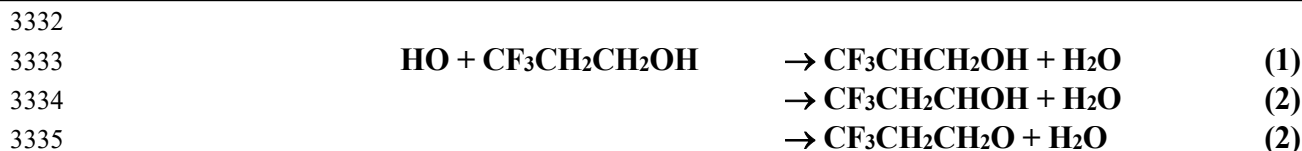

3336 **Rate coefficient data ( $k = k_1 + k_2 + k_3$ )**

| $k/\text{cm}^3 \text{ molecule}^{-1} \text{ s}^{-1}$ | $T/\text{K}$ | Reference              | Technique/<br>Comments |
|------------------------------------------------------|--------------|------------------------|------------------------|
| <i>Absolute Rate Coefficients</i>                    |              |                        |                        |
| $(0.89 \pm 0.03) \times 10^{-12}$                    | 298          | Kelly et al. (2005)    | PLP-LIF (a)            |
| $(0.97 \pm 0.11) \times 10^{-12}$                    | 298          | Jiménez et al. (2010)  | PLP-LIF (b)            |
| $2.82 \times 10^{-12} \exp[-(302 \pm 139)/T]$        | 263-358      | Antiñolo et al. (2011) | PLP-LIF (c)            |
| $(1.03 \pm 0.11) \times 10^{-12}$                    | 287          |                        |                        |
| <i>Relative Rate Coefficients</i>                    |              |                        |                        |
| $(1.06 \pm 0.04) \times 10^{-12}$                    | 298          | Kelly et al. (2005)    | RR (d)                 |
| $(1.05 \pm 0.05) \times 10^{-12}$                    |              |                        | RR (d)                 |
| $(1.43 \pm 0.03) \times 10^{-12}$                    |              |                        | RR (d)                 |
| $(0.68 \pm 0.07) \times 10^{-13}$                    | 296          | Hurley et al (2005)    | RR (e)                 |
| $(0.70 \pm 0.08) \times 10^{-13}$                    |              |                        | RR (e)                 |

3339 **Comments**

- 3340  
 3341  
 3342 (a) HO radicals were generated by the 248 nm photolysis of H<sub>2</sub>O<sub>2</sub> in 100 Torr (133 mbar) of helium  
 3343 diluent at 298 K.  
 3344 (b) HO radicals were produced by 248 nm photolysis of H<sub>2</sub>O<sub>2</sub> in 47-211 Torr (63-281 mbar) of helium  
 3345 diluent at 298 K.  
 3346 (c) HO radicals were produced by 248 nm photolysis of H<sub>2</sub>O<sub>2</sub> in 46-95 Torr (61-127 mbar) of helium  
 3347 diluent at 263-358 K.  
 3348 (d) HO radicals were generated by the 254 nm (Hg lamp) photolysis of either H<sub>2</sub>O<sub>2</sub> or O<sub>3</sub> (in the  
 3349 presence of H<sub>2</sub>O vapor) in one atmosphere of air. Rate coefficient ratios of  
 3350  $k(\text{HO}+\text{CF}_3\text{CH}_2\text{CH}_2\text{OH})/k(\text{HO}+\text{HC}(\text{O})\text{OC}_4\text{H}_9) = 0.30 \pm 0.01$ ,  $k(\text{HO}+\text{CF}_3\text{CH}_2\text{CH}_2\text{OH})/k(\text{HO}+n$   
 3351  $\text{hexane}) = 0.20 \pm 0.01$ , and  $k(\text{HO}+\text{CF}_3\text{CH}_2\text{CH}_2\text{OH})/k(\text{HO}+\text{CF}_3\text{CH}_2\text{OH}) = 0.95 \pm 0.02$  were  
 3352 determined. Placing these ratios on an absolute basis using  $k(\text{HO}+\text{HC}(\text{O})\text{OC}_4\text{H}_9) = 3.54 \times 10^{-12}$  (Le  
 3353 Calvé et al., 1997),  $k(\text{HO}+n\text{-hexane}) = 5.27 \times 10^{-12}$  (Calvert et al., 2008), and  $k(\text{HO}+\text{CF}_3\text{CH}_2\text{OH}) =$   
 3354  $1.5 \times 10^{-12} \text{ cm}^3 \text{ molecule}^{-1} \text{ s}^{-1}$  (present recommendation) gives  $k(\text{HO}+\text{CF}_3\text{CH}_2\text{CH}_2\text{OH}) = (1.06 \pm$   
 3355  $0.04) \times 10^{-12}$ ,  $(1.05 \pm 0.05) \times 10^{-12}$ , and  $(1.43 \pm 0.03) \times 10^{-12}$ , respectively.  
 3356 (e) HO radicals were generated by the photolysis of CH<sub>3</sub>ONO in 700 Torr (933 mbar) of air. Rate  
 3357 coefficient ratios of  $k(\text{HO}+\text{CF}_3\text{CH}_2\text{CH}_2\text{OH})/k(\text{HO}+\text{C}_2\text{H}_2) = 0.87 \pm 0.09$  and  
 3358  $k(\text{HO}+\text{CF}_3\text{CH}_2\text{CH}_2\text{OH})/k(\text{HO}+\text{C}_2\text{H}_4) = 0.089 \pm 0.010$  were reported. Using  $k(\text{HO}+\text{C}_2\text{H}_2) = 7.8$   
 3359  $\times 10^{-13}$  and  $k(\text{HO}+\text{C}_2\text{H}_4) = 7.9 \times 10^{-12}$  (Atkinson et al., 2006) gives  $k(\text{HO}+\text{CF}_3\text{CH}_2\text{CH}_2\text{OH}) = (6.79$   
 3360  $\pm 0.70) \times 10^{-13}$  and  $(7.03 \pm 0.79) \times 10^{-13} \text{ cm}^3 \text{ molecule}^{-1} \text{ s}^{-1}$ .

3361 **Preferred Values**

| Parameter                                            | Value                 | $T/\text{K}$ |
|------------------------------------------------------|-----------------------|--------------|
| $k/\text{cm}^3 \text{ molecule}^{-1} \text{ s}^{-1}$ | $9.6 \times 10^{-13}$ | 298          |

$k / \text{cm}^3 \text{ molecule}^{-1} \text{ s}^{-1}$  $2.72 \times 10^{-12} \exp(-305/T)$ 

260-360

3364

3365 *Reliability* $\Delta \log k$ 

0.10

298

 $\Delta E/R$  $\pm 200$ 

260-360

3366

3367 *Comments on Preferred Values*

3368

3369

3370

3371

3372

3373

3374

3375

3376

3377

3378

3379

3380

3381

3382

3383

3384

3385

3386

3387

There is significant scatter in the room temperature rate coefficients reported in the relative rate studies by Kelly et al. (2005) and Hurley et al. (2005). The room temperature rate coefficients reported in the absolute rate studies by Kelly et al. (2005) and Jiménez et al. (2010) are in good agreement. The absolute rate determinations at 298 K by Kelly et al. (2005) and Jiménez et al. (2010) lie in the center of the scatter in the results from the relative rate studies of Kelly et al. (2005) and Hurley et al. (2005). The preferred rate coefficient at 298 K is an average from the results of the absolute rate studies by Kelly et al. (2005) and Jiménez et al. (2010). An interpolation of the absolute rate data at 263 – 358 K reported by Antiñolo et al. (2011) is in good agreement with the preferred rate coefficient at 298 K. The preferred temperature dependence is taken from a fit to the data from Antiñolo et al. (2011) with the pre-exponential factor adjusted to be consistent with the preferred rate coefficient at 298K. The majority of reaction is believed to occur via hydrogen abstraction from the  $-\text{CH}_2-$  group bearing the alcohol functionality (Calvert et al., 2010). Subsequent reaction of the  $\text{CF}_3\text{CH}_2\text{CHOH}$  with  $\text{O}_2$  will give  $\text{CF}_3\text{CH}_2\text{CHO}$ . The HO radical initiated oxidation of  $\text{CF}_3\text{CH}_2\text{CH}_2\text{OH}$  is expected to give  $\text{CF}_3\text{CH}_2\text{CHO}$  in a yield close to 100%. Consistent with this expectation, Hurley et al. (2005) observed the formation of  $\text{CF}_3\text{CH}_2\text{CHO}$  as the sole product of the chlorine-atom-initiated oxidation of  $\text{CF}_3\text{CH}_2\text{CH}_2\text{OH}$  in one atmosphere of air.

## References

3388

Antiñolo, M., Jiménez, E., and Albaladejo, J.: Environ. Sci. Technol., 45, 4323, 2011.

3389

Atkinson, R., Baulch, D. L., Cox, R. A., Crowley, J. N., Hampson, R. F., Hynes, R. G., Jenkin, M. E.,

3390

Rossi, M. J., and Troe, J.: Atmos. Chem. Phys., 6, 3625, 2006; IUPAC Task Group on Atmospheric

3391

Chemical Kinetic Data Evaluation, <https://iupac.aeris-data.fr/>.

3392

Calvert, J. G., Derwent, R. G., Orlando, J. J., Tyndall, G. S. and Wallington T. J.: Mechanisms of

3393

Atmospheric Oxidation of the Alkanes, Oxford University Press, New York, NY, 2008.

3394

Calvert, J. G., Mellouki, A., Orlando, J. J., Pilling, M., and Wallington T. J.: The Mechanisms of

3395

Atmospheric Oxidation of the Oxygenates, Oxford University Press, New York, NY, 2011.

3396

Hurley, M. D., Misner, J. A., Ball, J. C., Wallington, T. J., Ellis, D. A., Martin, J. W., and Mabury, S. A.: J.

3397

Phys. Chem. A, 109, 9816, 2005.

3398

Jiménez, E., Antiñolo, M., Ballesteros, B., Martínez, E., and Albaladejo, J.: ChemPhysChem, 11, 4079,

3399

2010.

3400

Kelly, T., Bossoutrot, V., Magneron, I., Wirtz, K., Treacy, J., Mellouki, A., Sidebottom, H., and Le Bras,

3401

G.: J. Phys. Chem. A, 109, 347, 2005.

3402

Le Calvé, S., Le Bras, G., and Mellouki, A.: J. Phys. Chem. A, 101, 5489, 1997.

3403

3404

3405

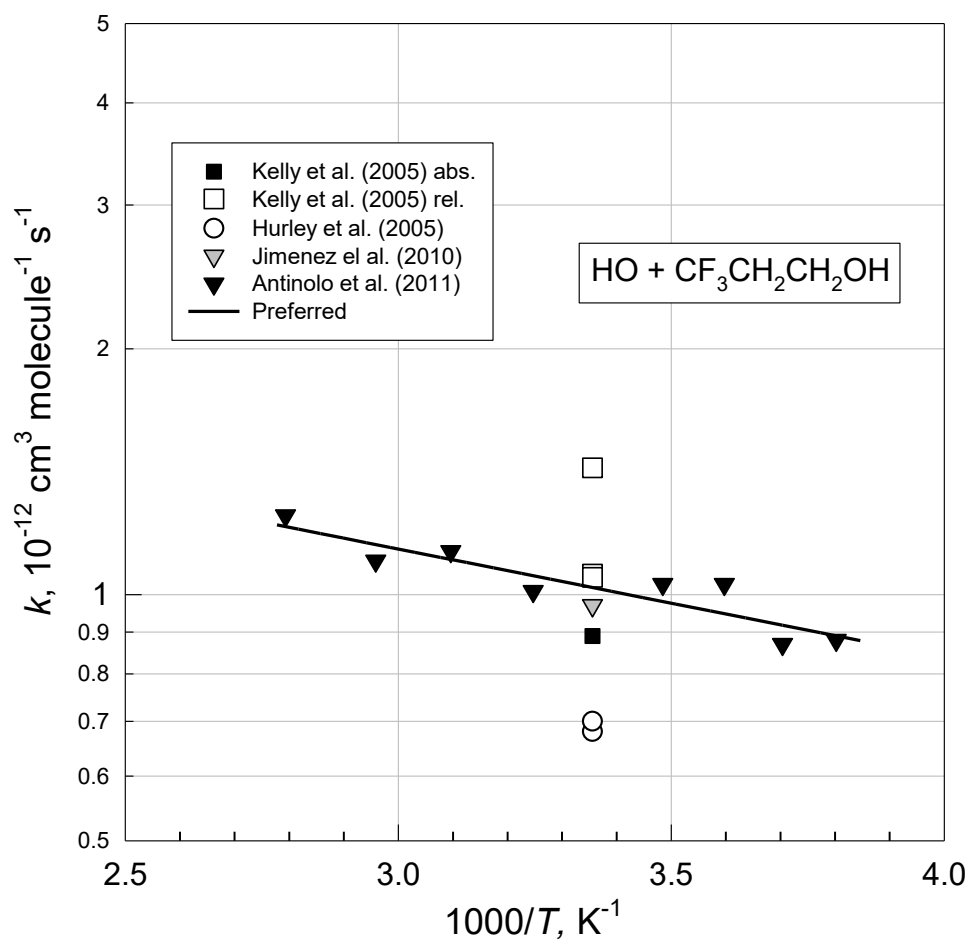

3406  
3407

3410  
 3411  
 3412  
 3413  
 3414  
 3415

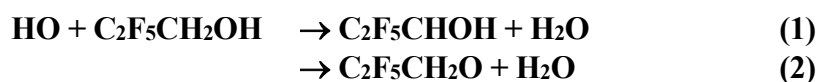

**Rate coefficient data ( $k = k_1 + k_2$ )**

| $k/\text{cm}^3 \text{ molecule}^{-1} \text{ s}^{-1}$    | $T/\text{K}$ | Reference               | Technique/<br>Comments   |
|---------------------------------------------------------|--------------|-------------------------|--------------------------|
| <i>Absolute Rate Coefficients</i>                       |              |                         |                          |
| $(1.40 \pm 0.27) \times 10^{-12} \exp[-(780 \pm 60)/T]$ | 250-430      | Tokuhashi et al. (1999) | LP-LIF (a)               |
| $1.00 \times 10^{-13}$                                  | 298          |                         | FP-LIF (a)<br>DF-LIF (a) |
| $1.36 \times 10^{-12} \exp[-(730 \pm 43)/T]$            | 263-358      | Antiñolo et al. (2012)  | PLP-LIF (b)              |
| $(1.19 \pm 0.03) \times 10^{-13}$                       | 287          |                         |                          |
| <i>Relative Rate Coefficients</i>                       |              |                         |                          |
| $1.5 \times 10^{-12} \exp[-(818)/T]$                    | 298-356      | Chen et al. (2000)      | RR(c)                    |
| $9.84 \times 10^{-14}$                                  | 298          |                         |                          |
| $(9.4 \pm 0.8) \times 10^{-14}$                         | 296          | Hurley et al. (2004)    | RR (d)                   |

3416

**Comments**

3417  
 3418

- 3419 (a) Three different absolute rate methods were employed by Tokuhashi et al. (1999): LP-LIF, FP-LIF,  
 3420 and DF-LIF. HO radicals in the LP-LIF experiments were generated by the 193 nm photolysis of  
 3421 N<sub>2</sub>O to produce O(<sup>1</sup>D) atoms in the presence of H<sub>2</sub>O in 15-70 Torr (20-93 mbar) of helium diluent.  
 3422 HO radicals in the FP-LIF experiments were generated by the photolysis (Xe flash lamp,  $\lambda \geq 180$   
 3423 nm) of H<sub>2</sub>O in argon diluent. HO radicals in the DF-LIF experiments were generated by the reaction  
 3424 of H atoms with NO<sub>2</sub> in 4-6 Torr (5-8 mbar) of argon diluent. There was good agreement between  
 3425 the results from experiments using the three different techniques. The value at 298 K cited above is  
 3426 the average obtained using the different techniques.
- 3427 (b) HO radicals were produced by 248 nm photolysis of H<sub>2</sub>O<sub>2</sub> in 43-214 Torr (57-285 mbar) of helium  
 3428 diluent at 263-358 K. No effect of total pressure was reported over the range studied.
- 3429 (c) HO radicals were generated by the photolysis of O<sub>3</sub> in the presence of water vapor in 1 bar of O<sub>2</sub>  
 3430 diluent. The decay of C<sub>2</sub>F<sub>5</sub>CH<sub>2</sub>OH was monitored relative to that of CH<sub>2</sub>Cl<sub>2</sub>. Chen et al. (2000)  
 3431 used the expression  $k(\text{HO}+\text{CH}_2\text{Cl}_2) = 3.8 \times 10^{-12} \exp(-1050/T)$  to place their results on an absolute  
 3432 basis. Rescaling using  $k(\text{HO}+\text{CH}_2\text{Cl}_2) = 1.8 \times 10^{-12} \exp(-860/T)$  (Atkinson et al., 2008) and fitting  
 3433 an Arrhenius expression to the results gives  $k(\text{HO}+\text{C}_2\text{F}_5\text{CH}_2\text{OH}) = 1.5 \times 10^{-12} \exp(-818/T) \text{ cm}^3$   
 3434  $\text{molecule}^{-1} \text{ s}^{-1}$ .
- 3435 (d) HO radicals were generated by the photolysis of CH<sub>3</sub>ONO in 700 Torr (933 mbar) of air. A rate  
 3436 coefficient ratio of  $k(\text{HO}+\text{C}_2\text{F}_5\text{CH}_2\text{OH})/k(\text{HO}+\text{C}_2\text{H}_2) = 0.12 \pm 0.01$  was reported. Using  
 3437  $k(\text{HO}+\text{C}_2\text{H}_2) = 7.8 \times 10^{-13} \text{ cm}^3 \text{ molecule}^{-1} \text{ s}^{-1}$  (Atkinson et al., 2006) gives  $k(\text{HO}+\text{C}_2\text{F}_5\text{CH}_2\text{OH}) =$   
 3438  $(9.4 \pm 0.8) \times 10^{-14} \text{ cm}^3 \text{ molecule}^{-1} \text{ s}^{-1}$ .

3439  
 3440  
 3441  
 3442  
 3443  
 3444

3445  
3446

## Preferred Values

| Parameter                                              | Value                               | T/K     |
|--------------------------------------------------------|-------------------------------------|---------|
| $k / \text{cm}^3 \text{ molecule}^{-1} \text{ s}^{-1}$ | $1.05 \times 10^{-13}$              | 298     |
| $k / \text{cm}^3 \text{ molecule}^{-1} \text{ s}^{-1}$ | $1.28 \times 10^{-12} \exp(-748/T)$ | 250-430 |
| <i>Reliability</i>                                     |                                     |         |
| $\Delta \log k$                                        | 0.06                                | 298     |
| $\Delta E/R$                                           | $\pm 200$                           | 250-430 |

3447  
34483449  
3450  
3451*Comments on Preferred Values*

The rate coefficients reported in the absolute rate studies by Tokuhashi et al. (1997) and Antiñolo et al. (2012) and the relative rate studies by Chen et al. (2000) and Hurley et al. (2004) are in good agreement. Taking an average of the determinations by Tokuhashi et al. (1997) and Antiñolo et al. (2012) gives  $k(\text{HO} + \text{C}_2\text{F}_5\text{CH}_2\text{OH}) = 1.05 \times 10^{-13} \text{ cm}^3 \text{ molecule}^{-1} \text{ s}^{-1}$  at 298 K. Fitting the Arrhenius expression to the data from Tokuhashi et al. (1997) and Antiñolo et al. (2012) and adjusting the pre-exponential factor to reproduce the preferred value at 298 K gives  $k(\text{HO} + \text{C}_2\text{F}_5\text{CH}_2\text{OH}) = 1.28 \times 10^{-12} \exp(-748/T) \text{ cm}^3 \text{ molecule}^{-1} \text{ s}^{-1}$ . The HO radical initiated oxidation of  $\text{C}_2\text{F}_5\text{CH}_2\text{OH}$  is expected to lead to quantitative conversion into  $\text{C}_2\text{F}_5\text{CHO}$  (Calvert et al., 2011).

3460  
3461  
3462

## References

3463  
3464  
3465  
3466  
3467  
3468  
3469  
3470  
3471  
3472  
3473  
3474  
3475  
3476  
3477  
3478  
3479  
3480  
3481  
3482

- Antiñolo, M., Gonzalez, S., Ballesteros, B., Albaladejo, J., and Jiménez, E.: J. Phys. Chem. A, 116, 6041, 2012.
- Atkinson, R., Baulch, D. L., Cox, R. A., Crowley, J. N., Hampson, R. F., Hynes, R. G., Jenkin, M. E., Rossi, M. J., and Troe, J.: Atmos. Chem. Phys., 6, 3625, 2006; IUPAC Task Group on Atmospheric Chemical Kinetic Data Evaluation, <https://iupac.aeris-data.fr/>.
- Atkinson, R., Baulch, D. L., Cox, R. A., Crowley, J. N., Hampson, R. F., Hynes, R. G., Jenkin, M. E., Rossi, M. J., Troe, J., and Wallington, T. J.: Atmos. Chem. Phys., 8, 4141, 2008; IUPAC Subcommittee for Gas Kinetic Data Evaluation, <https://iupac.aeris-data.fr/>.
- Calvert, J. G., Mellouki, A., Orlando, J. J., Pilling, M., and Wallington T. J.: The Mechanisms of Atmospheric Oxidation of the Oxygenates, Oxford University Press, New York, NY, 2011.
- Chen, L., Fukuda, K., Takenaka, N., Bandow, H., Maeda, Y.: Int. J. Chem. Kinet., 32, 73, 2000.
- Hurley, M. D., Wallington, T. J., Andersen, M. P. S., Ellis, D. A., Martin, J. W., and Mabury, S.A.: J. Phys. Chem. A, 108, 1973, 2004.
- Tokuhashi, K., Nagai, H., Takahashi, A., Kaise, M., Kondo, S., Sekiya, A., Takahashi, M., Gotoh, Y., and Suga, A.: J. Phys. Chem. A, 103, 2664, 1999.

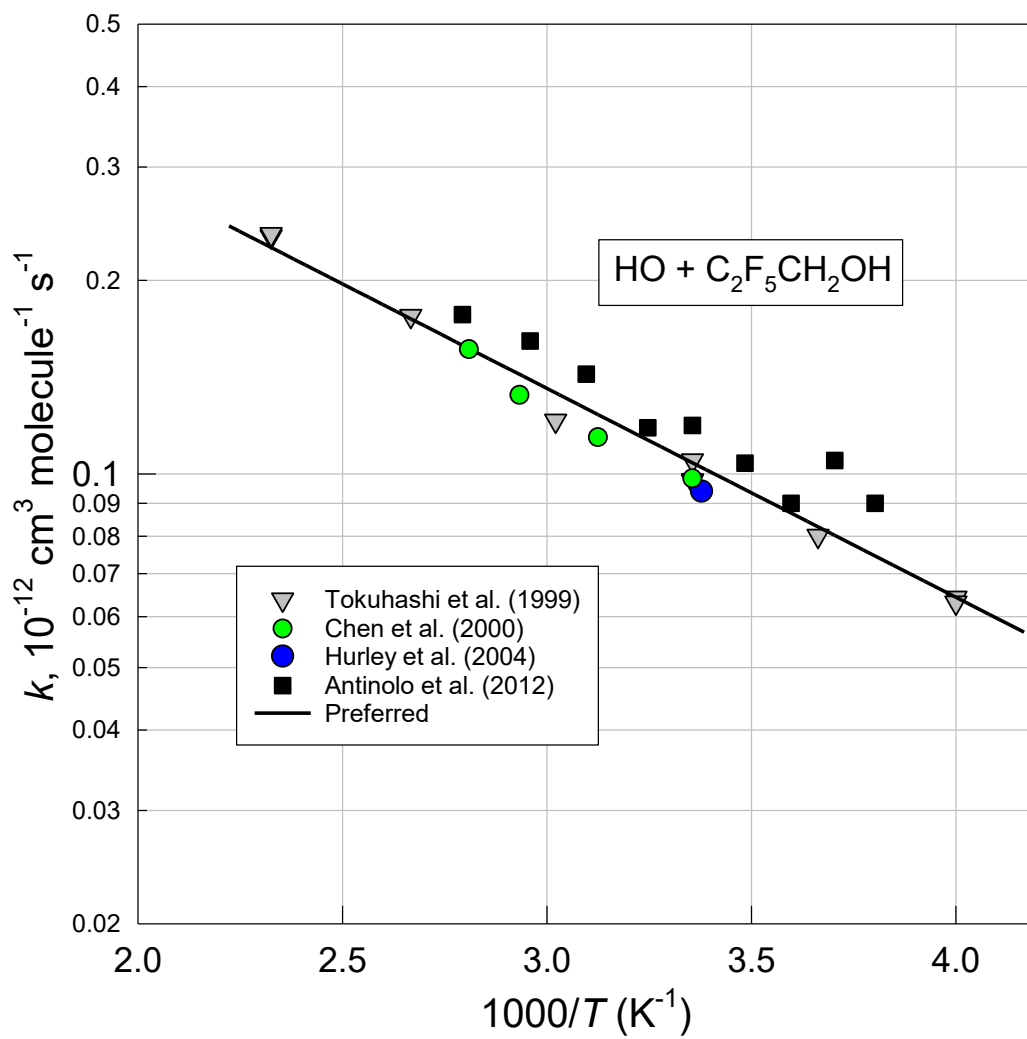

3483  
3484

3485 **oFOx89: HO + CF<sub>3</sub>CH(OH)CF<sub>3</sub>**  
 3486 Last evaluated: June 2025; Last change in preferred values: June 2019.

3487  
 3488  
 3489  
 3490  
 3491  
 3492

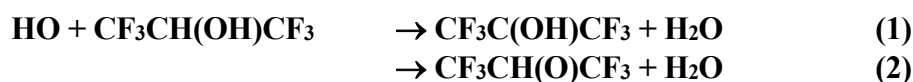

**Rate coefficient data ( $k = k_1 + k_2$ )**

| $k/\text{cm}^3 \text{ molecule}^{-1} \text{ s}^{-1}$                    | $T/\text{K}$ | Reference               | Technique/<br>Comments |
|-------------------------------------------------------------------------|--------------|-------------------------|------------------------|
| <i>Absolute Rate Coefficients</i>                                       |              |                         |                        |
| $(6.99 \pm 1.56) \times 10^{-13} \exp[-(990 \pm 70)/T]$                 | 250-430      | Tokuhashi et al. (1999) | LP-LIF (a)             |
| $2.52 \times 10^{-14}$                                                  | 298          |                         | FP-LIF (a)             |
|                                                                         |              |                         | DF-LIF (a)             |
| $1.19 \times 10^{-12} \exp(-1207/T) + 7.85 \times 10^{-16} \exp(502/T)$ | 220-370      | Orkin et al. (2012)     | FP-RF (b)              |
| $(2.47 \pm 0.03) \times 10^{-14}$                                       | 298          |                         |                        |

3493  
 3494  
 3495

**Comments**

- (a) Three different absolute rate methods were employed by Tokuhashi et al. (1999): LP-LIF, FP-LIF, and DF-LIF. HO radicals in the LP-LIF experiments were generated by the 193 nm photolysis of N<sub>2</sub>O to produce O(<sup>1</sup>D) atoms in the presence of H<sub>2</sub>O in 15-70 Torr (20-93 mbar) of helium diluent. HO radicals in the FP-LIF experiments were generated by the photolysis (Xe flash lamp,  $\lambda \geq 180$  nm) of H<sub>2</sub>O in argon diluent. HO radicals in the DF-LIF experiments were generated by the reaction of H atoms with NO<sub>2</sub> in 4-6 Torr (5-8 mbar) of argon diluent. There was good agreement between the results from experiments using the three different techniques. The value at 298 K cited above is the average obtained using the different techniques.
- (b) HO radicals were generated using the flash photolysis of H<sub>2</sub>O vapor in 30 Torr (40 mbar) of argon.

3504  
 3505  
 3506  
 3507

**Preferred Values**

| Parameter                                              | Value                                             | T/K     |
|--------------------------------------------------------|---------------------------------------------------|---------|
| $k / \text{cm}^3 \text{ molecule}^{-1} \text{ s}^{-1}$ | $2.43 \times 10^{-14}$                            | 298     |
| $k / \text{cm}^3 \text{ molecule}^{-1} \text{ s}^{-1}$ | $3.94 \times 10^{-15} (T/298)^{4.57} \exp(542/T)$ | 220-430 |
| <i>Reliability</i>                                     |                                                   |         |
| $\Delta \log k$                                        | 0.12                                              | 298     |

3510  
 3511  
 3512

*Comments on Preferred Values*

The results from Tokuhashi et al. (1997) and Orkin et al. (2012) are in excellent agreement. The preferred value at 298 K is an average of the values from Tokuhashi et al. (1997) and Orkin et al. (2012). There is significant curvature in the Arrhenius plot which is particularly evident in the data below 250 K. A fit of the modified Arrhenius expression to the combined data set from Tokuhashi et al. (1997) and Orkin et al. (2012) with the first term adjusted so the expression returns the preferred value at 298 K gives  $k(\text{HO} + \text{CF}_3\text{CH}(\text{OH})\text{CF}_3) = 3.94 \times 10^{-15} (T/298)^{4.57} \exp(542/T) \text{ cm}^3 \text{ molecule}^{-1} \text{ s}^{-1}$  which fits the data over the temperature range 220-430 K.

3520

3521 The HO radical initiated oxidation of  $\text{CF}_3\text{CH}(\text{OH})\text{CF}_3$  is expected to lead to quantitative conversion into  
3522  $\text{CF}_3\text{C}(\text{O})\text{CF}_3$  (Calvert et al., 2011).

3523

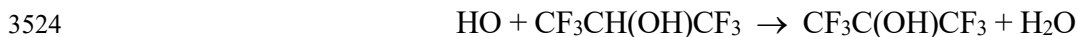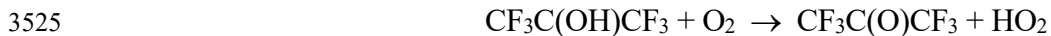

3526

3527

3528

### References

3529 Calvert, J. G., Mellouki, A., Orlando, J. J., Pilling, M., and Wallington T. J.: The Mechanisms of  
3530 Atmospheric Oxidation of the Oxygenates, Oxford University Press, New York, NY, 2011.

3531 Orkin, V. L., Khanaganov, V. G., Kurylo, M. J.: J. Phys. Chem. A, 116, 6188, 2012.

3532 Tokuhashi, K., Nagai, H., Takahashi, A., Kaise, M., Kondo, S., Sekiya, A., Takahashi, M., Gotoh, Y., and  
3533 Suga, A.: J. Phys. Chem. A, 103, 2664, 1999.

3534

3535

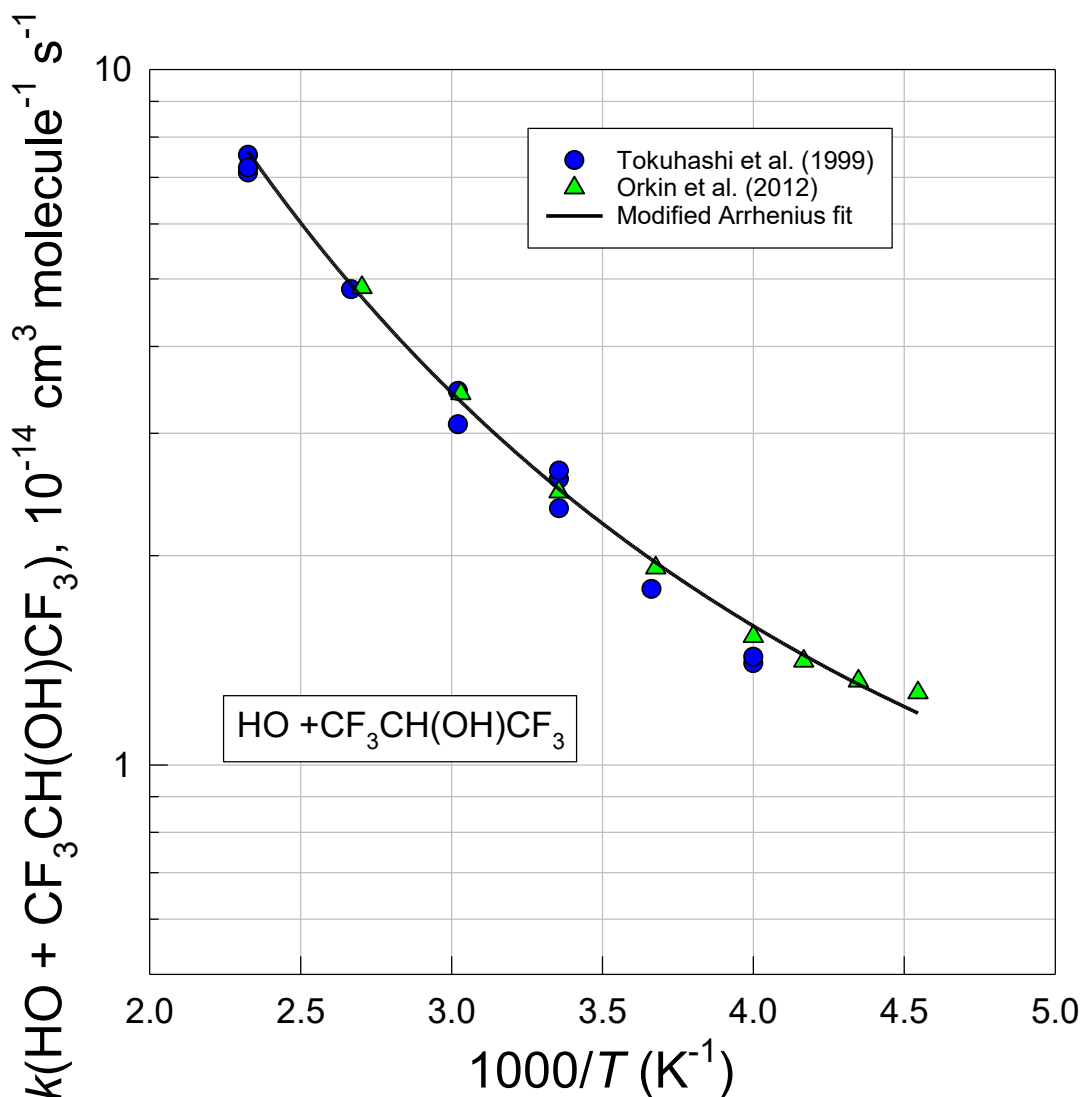

3536

3537

3538

3539

3540

3541

3542

3543 **oFOx158: HO + (CF<sub>3</sub>)<sub>2</sub>C(OH)CH<sub>3</sub>**  
 3544 Last evaluated: June 2025; Last change in preferred values: September 2019.

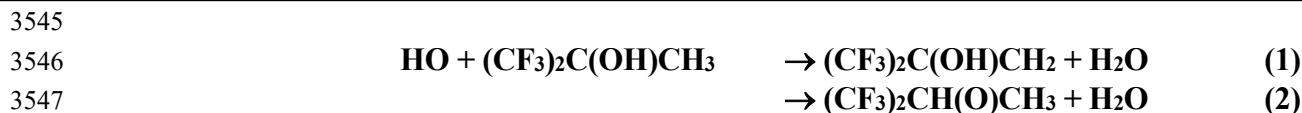

3548  
 3549 **Rate coefficient data ( $k = k_1 + k_2$ )**  
 3550

| $k/\text{cm}^3 \text{ molecule}^{-1} \text{ s}^{-1}$                    | $T/\text{K}$ | Reference           | Technique/<br>Comments |
|-------------------------------------------------------------------------|--------------|---------------------|------------------------|
| <i>Absolute Rate Coefficients</i>                                       |              |                     |                        |
| $1.68 \times 10^{-12} \exp(-1718/T) + 7.32 \times 10^{-16} \exp(371/T)$ | 230-370      | Orkin et al. (2012) | FP-RF (b)              |
| $(7.84 \pm 0.12) \times 10^{-15}$                                       | 298          |                     |                        |

3551  
 3552 **Comments**

3553  
 3554 (a) HO radicals were generated using the flash photolysis of H<sub>2</sub>O vapor in 30 Torr (40 mbar) of argon  
 3555 diluent and monitored using resonance fluorescence.

3556  
 3557 **Preferred Values**

| Parameter                                            | Value                                              | T/K     |
|------------------------------------------------------|----------------------------------------------------|---------|
| $k/\text{cm}^3 \text{ molecule}^{-1} \text{ s}^{-1}$ | $7.71 \times 10^{-15}$                             | 298     |
| $k/\text{cm}^3 \text{ molecule}^{-1} \text{ s}^{-1}$ | $1.90 \times 10^{-18} (T/298)^{11.5} \exp(2476/T)$ | 230-370 |
| <i>Reliability</i>                                   |                                                    |         |
| $\Delta \log k$                                      | 0.12                                               | 298     |

3561  
 3562 *Comments on Preferred Values*

3563  
 3564 The preferred value at 298 K is taken from Orkin et al. (2012). There is significant curvature in the  
 3565 Arrhenius plot which is particularly evident in the data below 250 K. A fit of the modified Arrhenius  
 3566 expression to the data set from Orkin et al. (2012) gives  $k(\text{HO} + (\text{CF}_3)_2\text{C}(\text{OH})\text{CH}_3) = 1.90 \times 10^{-18}$   
 3567  $(T/298)^{11.5} \exp(2476/T) \text{ cm}^3 \text{ molecule}^{-1} \text{ s}^{-1}$  over the temperature range 230-370 K.

3568  
 3569  
 3570 **References**

3571  
 3572 Orkin, V. L., Khamaganov, V. G., and Kurylo, M. J.: J. Phys. Chem. A, 116, 6188, 2012.

3573  
 3574  
 3575

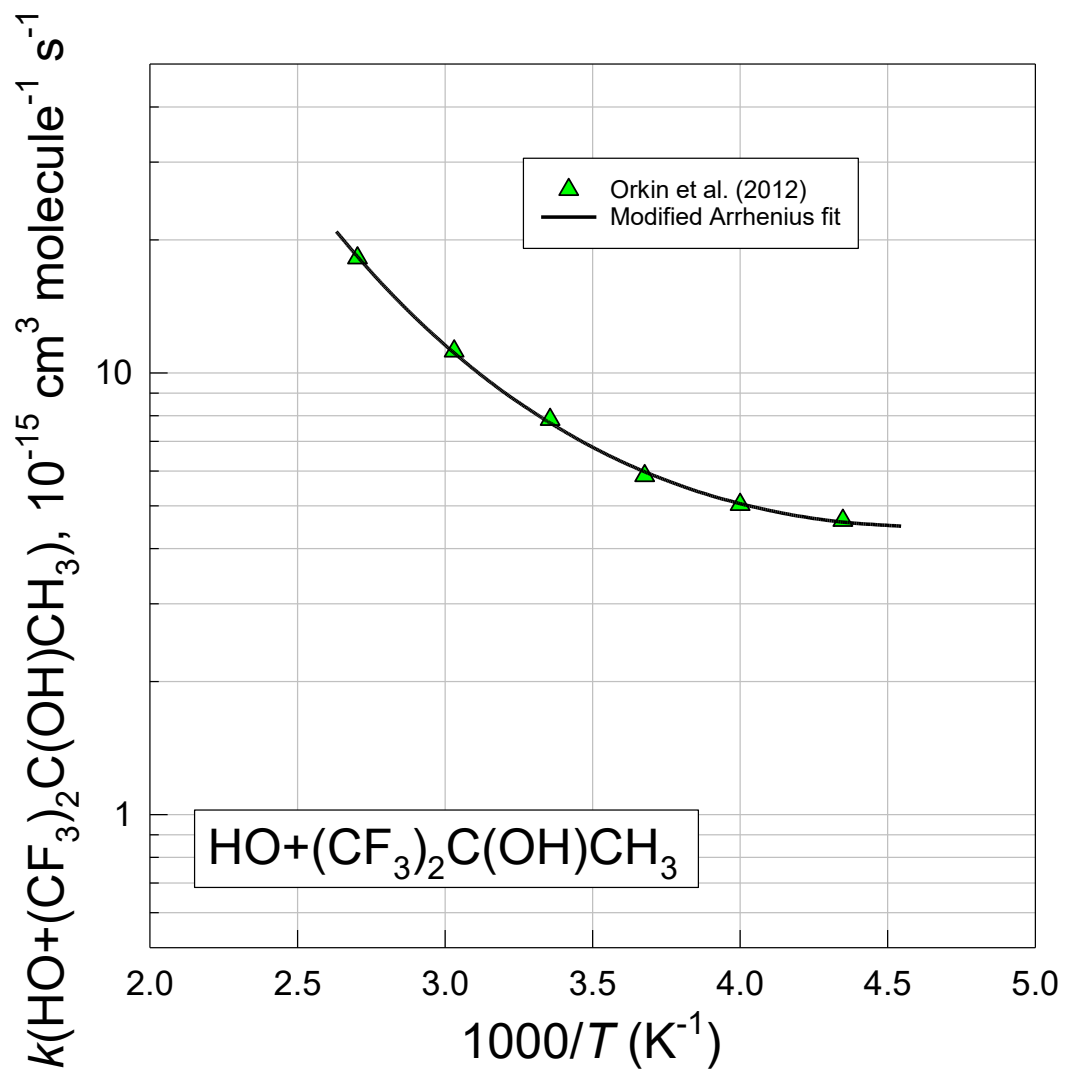

3576  
3577  
3578

3579 **oFOx159: HO + (CF<sub>3</sub>)<sub>3</sub>C(OH)**  
 3580 Last evaluated: June 2025; Last change in preferred values: June 2019.

3581

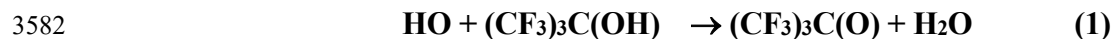

3583

3584

3585

**Rate coefficient data**

| $k/\text{cm}^3 \text{ molecule}^{-1} \text{ s}^{-1}$                                 | $T/\text{K}$   | Reference           | Technique/<br>Comments |
|--------------------------------------------------------------------------------------|----------------|---------------------|------------------------|
| <i>Absolute Rate Coefficients</i>                                                    |                |                     |                        |
| $3.0 \times 10^{-20} (T/298)^{11.3} \exp(3060/T)$<br>$(8.6 \pm 0.2) \times 10^{-16}$ | 230-370<br>298 | Orkin et al. (2012) | FP-RF (b)              |

3586

3587

3588

**Comments**

3589 (a) HO radicals were generated using the flash photolysis of H<sub>2</sub>O vapor in 30 Torr (40 mbar) of argon  
 3590 diluent and monitored using resonance fluorescence.

3591

3592

3593

**Preferred Values**

| Parameter                                            | Value                                             | T/K     |
|------------------------------------------------------|---------------------------------------------------|---------|
| $k/\text{cm}^3 \text{ molecule}^{-1} \text{ s}^{-1}$ | $8.6 \times 10^{-16}$                             | 298     |
| $k/\text{cm}^3 \text{ molecule}^{-1} \text{ s}^{-1}$ | $3.0 \times 10^{-20} (T/298)^{11.3} \exp(3060/T)$ | 230-370 |
| <i>Reliability</i>                                   |                                                   |         |
| $\Delta \log k$                                      | 0.12                                              | 298     |

3596

*Comments on Preferred Values*

3597

3598

3599 There is significant curvature in the Arrhenius plot. The  $k(298\text{K})$  value and modified Arrhenius  
 3600 expression from Orkin et al. (2012) are preferred. The HO radical initiated oxidation of (CF<sub>3</sub>)<sub>3</sub>C(OH) is  
 3601 expected to lead to quantitative conversion into CF<sub>3</sub>C(O)CF<sub>3</sub> (Calvert et al., 2011).

3602

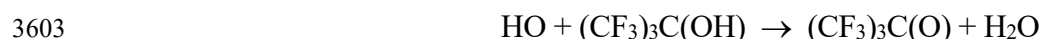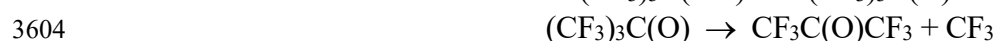

3605

3606

**References**

3607

3608 Calvert, J. G., Mellouki, A., Orlando, J. J., Pilling, M., and Wallington T. J.: The Mechanisms of  
 3609 Atmospheric Oxidation of the Oxygenates, Oxford University Press, New York, NY, 2011.

3610 Orkin, V. L., Khamaganov, V. G., and Kurylo, M. J.: J. Phys. Chem. A, 116, 6188, 2012.

3611

3612

3613

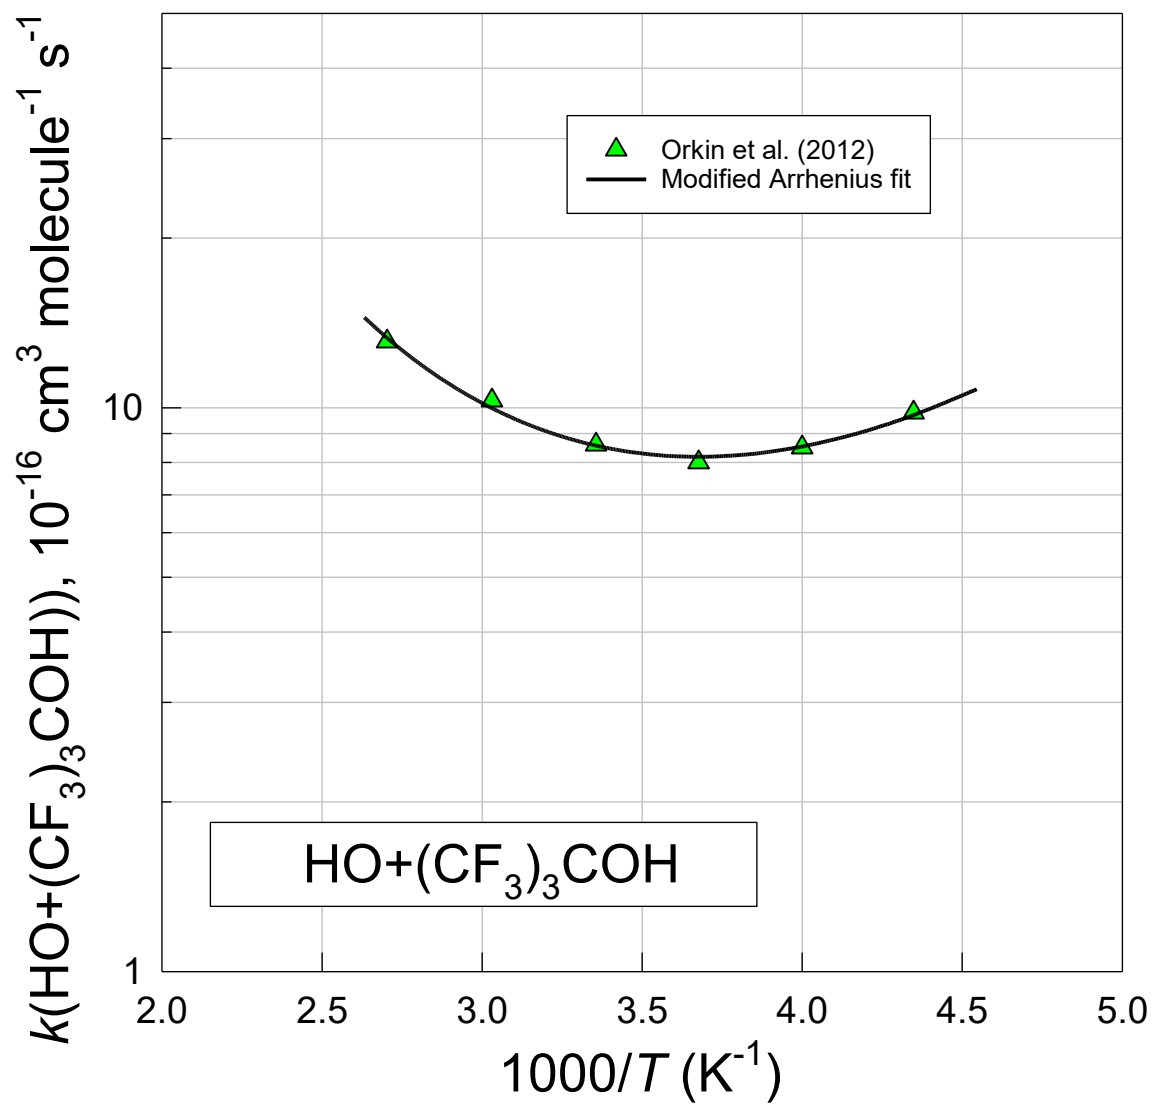

3614  
3615

3616 **oFOx90: HO + CF<sub>3</sub>CHF<sub>2</sub>CF<sub>2</sub>CH<sub>2</sub>OH**  
 3617 Last evaluated: June 2025; Last change in preferred values: June 2009.

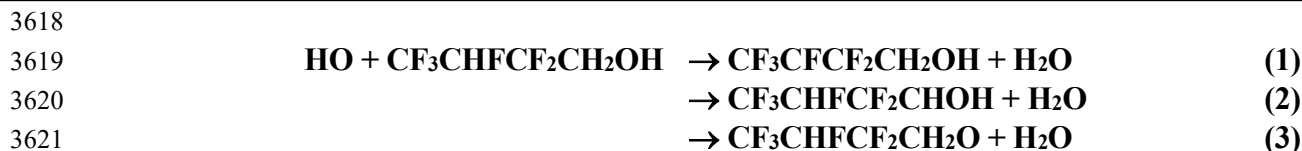

3622 **Rate coefficient data ( $k = k_1 + k_2 + k_3$ )**  
 3623  
 3624

| $k/\text{cm}^3 \text{ molecule}^{-1} \text{ s}^{-1}$    | $T/\text{K}$ | Reference          | Technique/<br>Comments |
|---------------------------------------------------------|--------------|--------------------|------------------------|
| <i>Absolute Rate Coefficients</i>                       |              |                    |                        |
| $(2.46 \pm 0.26) \times 10^{-12} \exp[-(880 \pm 40)/T]$ | 250-430      | Chen et al. (2003) | LP-LIF (a)             |
| $1.3 \times 10^{-13}$                                   | 298          |                    | FP-LIF (a)             |
| <i>Relative Rate Coefficients</i>                       |              |                    |                        |
| $6.03 \times 10^{-13} \exp(-510/T)$                     | 230-308      | Chen et al. (2003) | RR (b)                 |
| $(1.04 \pm 0.04) \times 10^{-13}$                       | 298          |                    |                        |
| $9.41 \times 10^{-13} \exp(-591/T)$                     | 230-308      | Chen et al. (2003) | RR (b)                 |
| $(1.27 \pm 0.03) \times 10^{-13}$                       | 298          |                    |                        |

3625 **Comments**

- 3626  
 3627 (a) Two different absolute rate methods were employed by Chen et al. (2003): LP-LIF and FP-LIF. HO  
 3628 radicals in the LP-LIF experiments were generated by the 193 nm photolysis of N<sub>2</sub>O to produce  
 3629 O(<sup>1</sup>D) atoms in the presence of H<sub>2</sub>O in 20-80 Torr (27-107 mbar) of helium diluent. HO radicals in  
 3630 the FP-LIF experiments were generated by the photolysis (Xe flash lamp) of H<sub>2</sub>O in 20-80 Torr (27-  
 3631 107 mbar) of argon diluent. There was good agreement between the results from experiments using  
 3632 the two different techniques. The Arrhenius expression is from a fit to the combined data set from  
 3633 both sets of absolute rate experiments. The value at 298 K cited above is the average obtained using  
 3634 the different techniques.  
 3635 (b) HO radicals were generated by the photolysis of O<sub>3</sub> at  $\lambda \geq 260$  nm using the output from Xe arc  
 3636 lamps in the presence of H<sub>2</sub>O vapor in 100 Torr (133 mbar) of helium diluent. CH<sub>2</sub>Cl<sub>2</sub> and CHCl<sub>3</sub>  
 3637 were used as reference compounds. Arrhenius fits to the rate coefficient ratios reported by Chen et  
 3638 al. (2003) give  $k(\text{HO} + \text{CF}_3\text{CHF}_2\text{CF}_2\text{CH}_2\text{OH})/k(\text{HO} + \text{CH}_2\text{Cl}_2) = 0.335 \exp(350/T)$  and  
 3639  $k(\text{HO} + \text{CF}_3\text{CHF}_2\text{CF}_2\text{CH}_2\text{OH})/k(\text{HO} + \text{CHCl}_3) = 0.523 \exp(259/T)$ . Placing these ratios on an absolute  
 3640 basis using  $k(\text{HO} + \text{CH}_2\text{Cl}_2) = 1.8 \times 10^{-12} \exp(-860/T)$  and  $k(\text{HO} + \text{CHCl}_3) = 1.8 \times 10^{-12} \exp(-850/T)$   
 3641 (Atkinson et al., 2008) gives  $k(\text{HO} + \text{CF}_3\text{CHF}_2\text{CF}_2\text{CH}_2\text{OH}) = 6.03 \times 10^{-13} \exp(-510/T)$  and  $9.41 \times 10^{-13}$   
 3642  $\exp(-591/T) \text{ cm}^3 \text{ molecule}^{-1} \text{ s}^{-1}$ , respectively. Over the temperature range where comparison is  
 3643 possible, the results from the relative rate studies are consistent with those from the absolute study.  
 3644

3645 **Preferred Values**  
 3646

| Parameter                                            | Value                               | $T/\text{K}$ |
|------------------------------------------------------|-------------------------------------|--------------|
| $k/\text{cm}^3 \text{ molecule}^{-1} \text{ s}^{-1}$ | $1.3 \times 10^{-13}$               | 298          |
| $k/\text{cm}^3 \text{ molecule}^{-1} \text{ s}^{-1}$ | $2.26 \times 10^{-12} \exp(-848/T)$ | 250-430      |
| <i>Reliability</i>                                   |                                     |              |
| $\Delta \log k$                                      | 0.12                                | 298          |
| $\Delta E/R$                                         | $\pm 200$                           | 250-430      |

3648 *Comments on Preferred Values*

3649

3650

3651

3652

3653

3654

3655

3656

3657

3658 Atkinson, R., Baulch, D. L., Cox, R. A., Crowley, J. N., Hampson, R. F., Hynes, R. G., Jenkin, M. E., Rossi,  
3659 M. J., Troe, J., and Wallington, T. J.: Atmos. Chem. Phys., 8, 4141, 2008; IUPAC Subcommittee for Gas  
3660 Kinetic Data Evaluation, <https://iupac.aeris-data.fr/>.

3661 Calvert, J. G., Mellouki, A., Orlando, J. J., Pilling, M., and Wallington T. J.: The Mechanisms of Atmospheric  
3662 Oxidation of the Oxygenates, Oxford University Press, New York, NY, 2011.

3663 Chen, L., Tokuhashi, K., Kutsuna, S., Sekiya, A., Yonei, Y., and Yamamoto, A.: Chem. Phys. Lett., 382, 277,  
3664 2003.

3665

3666

### References

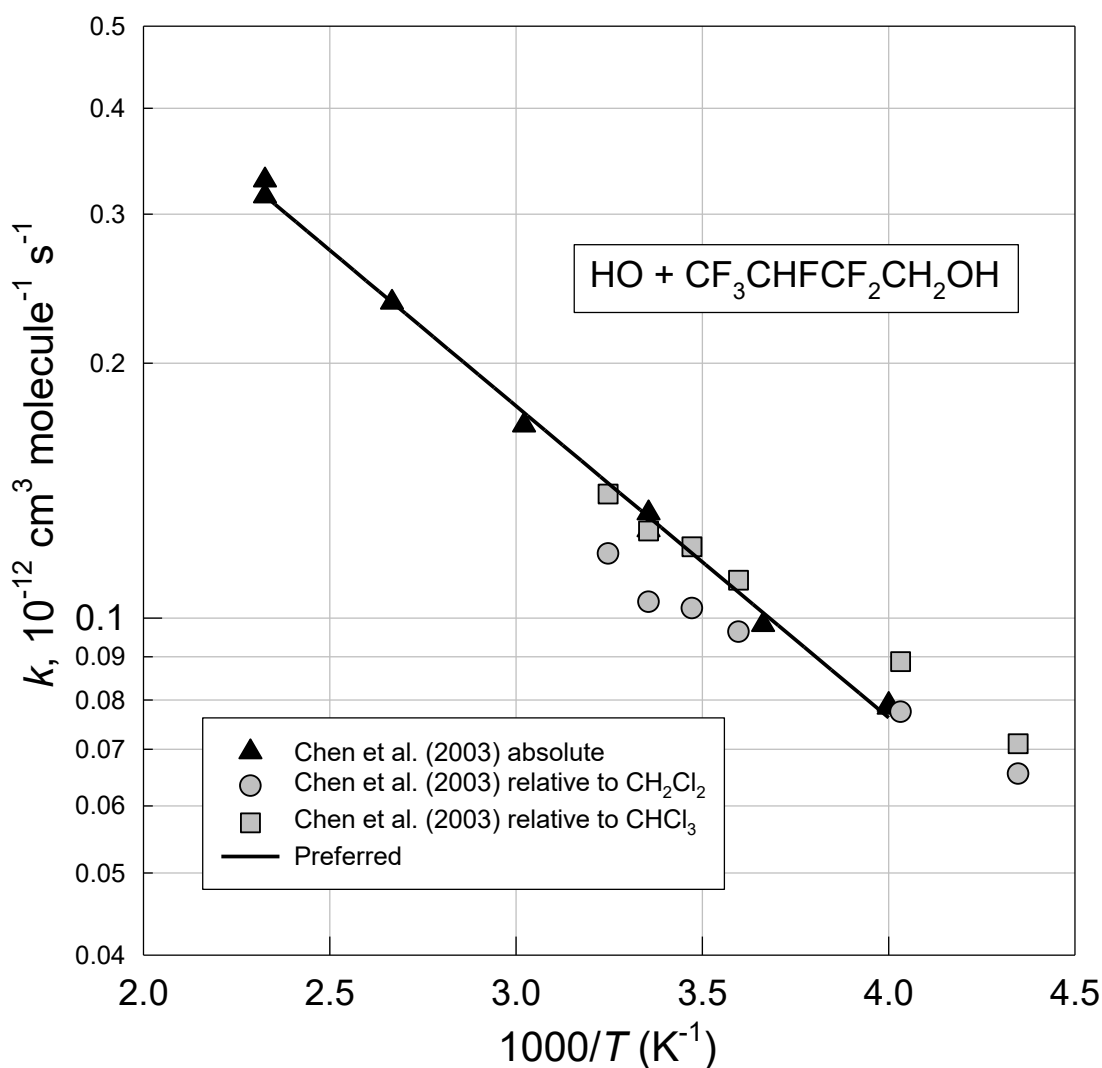

3667

3668

3669 **oFOx91: HO + *n*-C<sub>3</sub>F<sub>7</sub>CH<sub>2</sub>OH**  
 3670 Last evaluated: June 2025; Last change in preferred values: June 2025.

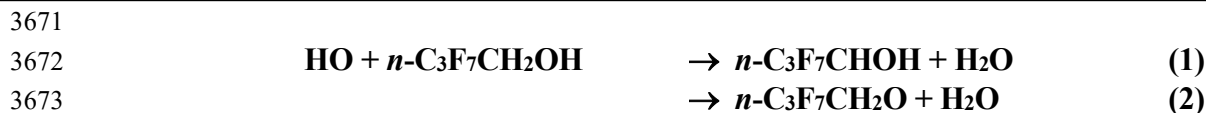

3674  
 3675 **Rate coefficient data (*k* = *k*<sub>1</sub> + *k*<sub>2</sub>)**  
 3676

| <i>k</i> /cm <sup>3</sup> molecule <sup>-1</sup> s <sup>-1</sup>                        | <i>T</i> /K | Reference              | Technique/<br>Comments |
|-----------------------------------------------------------------------------------------|-------------|------------------------|------------------------|
| <i>Absolute Rate Coefficients</i>                                                       |             |                        |                        |
| (1.4 <sup>+0.3</sup> <sub>-0.2</sub> ) × 10 <sup>-11</sup> exp [-(1460±120)/ <i>T</i> ] | 290-368     | Bravo et al. (2010)    | DF-MS (a)              |
| (1.07 ± 0.05) × 10 <sup>-13</sup>                                                       | 298         |                        |                        |
| (1.54 × 10 <sup>-12</sup> exp[-(765±170)/ <i>T</i> ])                                   | 298-363     | Indulkar et al. (2011) | LP-LIF (b)             |
| (1.15 ± 0.12) × 10 <sup>-13</sup>                                                       | 298         |                        |                        |
| <i>Relative Rate Coefficients</i>                                                       |             |                        |                        |
| (9.4 ± 0.8) × 10 <sup>-14</sup>                                                         | 296         | Hurley et al. (2004)   | RR (c)                 |

3677  
 3678 **Comments**

3679  
 3680(a) F atoms produced in a microwave discharge of F<sub>2</sub>/He mixtures were reacted with H<sub>2</sub>O to generate HO  
 3681 radicals. Experiments were conducted in a flow tube at a pressure of 1 Torr of helium diluent. HO  
 3682 radicals were monitored by mass spectroscopy by adding I<sub>2</sub> and detecting the HOI product.  
 3683(b) HO radicals were produced by the photolysis of H<sub>2</sub>O<sub>2</sub> at 248 nm and monitored by laser induced  
 3684 fluorescence in 55 Torr of helium diluent.  
 3685(c) HO radicals were generated by the photolysis of CH<sub>3</sub>ONO in 700 Torr (933 mbar) of air. A rate  
 3686 coefficient ratio of *k*(HO+C<sub>3</sub>F<sub>7</sub>CH<sub>2</sub>OH)/*k*(HO+C<sub>2</sub>H<sub>2</sub>) = 0.12 ± 0.01 was reported. Using *k*(HO+C<sub>2</sub>H<sub>2</sub>) =  
 3687 7.8 × 10<sup>-13</sup> cm<sup>3</sup> molecule<sup>-1</sup> s<sup>-1</sup> (Atkinson et al., 2006) gives *k*(HO+C<sub>3</sub>F<sub>7</sub>CH<sub>2</sub>OH) = (9.4 ± 0.8) × 10<sup>-14</sup> cm<sup>3</sup>  
 3688 molecule<sup>-1</sup> s<sup>-1</sup>.

3689  
 3690 **Preferred Values**

| Parameter                                                        | Value                                          | <i>T</i> /K |
|------------------------------------------------------------------|------------------------------------------------|-------------|
| <i>k</i> /cm <sup>3</sup> molecule <sup>-1</sup> s <sup>-1</sup> | 1.11 × 10 <sup>-13</sup>                       | 298         |
| <i>k</i> /cm <sup>3</sup> molecule <sup>-1</sup> s <sup>-1</sup> | 6.06 × 10 <sup>-12</sup> exp(-1192/ <i>T</i> ) | 280-370     |
| <i>Reliability</i>                                               |                                                |             |
| Δ log <i>k</i>                                                   | ± 0.10                                         | 298         |
| Δ E/R                                                            | ± 200                                          | 280-370     |

3694  
 3695 **Comments on Preferred Values**

3696  
 3697 The results from the absolute rate studies by Bravo et al. (2010), Indulkar et al. (2011), and the  
 3698 relative rate study by Hurley et al. (2005) at ambient temperature are in good agreement. The preferred  
 3699 rate coefficient at 298 K is an average from the two absolute rate studies. The Arrhenius expression was  
 3700 obtained using the temperature dependence derived from fitting an Arrhenius expression to the combined  
 3701 data set from Bravo et al. (2010) and Indulkar et al. (2011) and adjusting the pre-exponential factor to

3702 match the preferred rate coefficient at 298 K.

3703

3704

3705

### References

3706 Atkinson, R., Baulch, D. L., Cox, R. A., Crowley, J. N., Hampson, R. F., Hynes, R. G., Jenkin, M. E.,  
3707 Rossi, M. J., and Troe, J.: Atmos. Chem. Phys., 6, 3625, 2006; IUPAC Subcommittee for Gas Kinetic  
3708 Data Evaluation, <https://iupac.aeris-data.fr/>.

3709 Bravo, I., Diaz-de-Mera, Y., Aranda, A., Smith, K., Shine, K. P., and Marston, G.: Phys. Chem. Chem.  
3710 Phys., 12, 5115, 2010.

3711 Hurley, M. D., Wallington, T. J., Andersen, M. P. S., Ellis, D. A., Martin, J. W., and Mabury, S. A.: J.  
3712 Phys. Chem. A, 108, 1973, 2004.

3713 Indulkar, Y. N., SenGupta, S., Waghmode, S. B., Kumar, A., Dhanya, S., and Naik, P. D.: Atmos.  
3714 Environ., 45, 6973, 2011.

3715

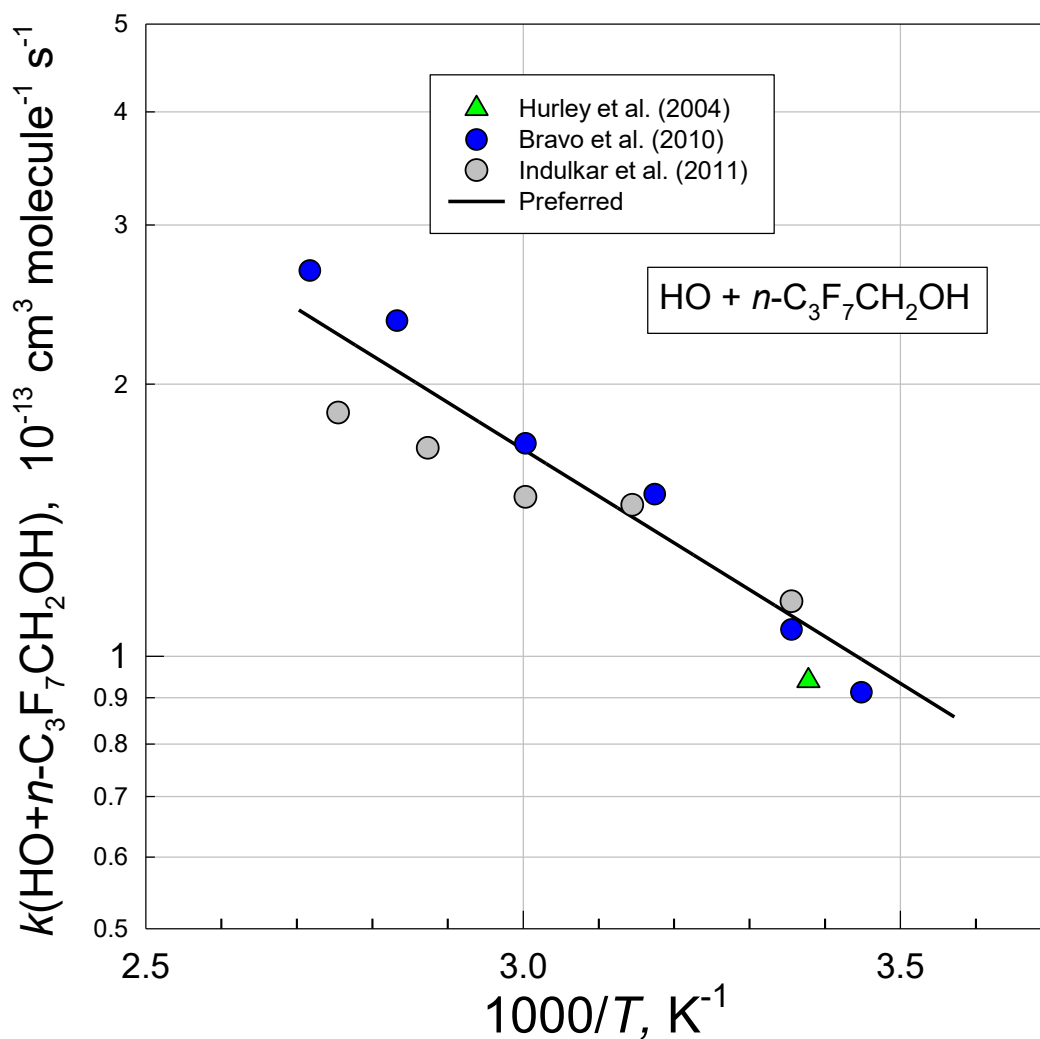

3716

3717

3718 **oFOx92: HO + n-C<sub>4</sub>F<sub>9</sub>CH<sub>2</sub>OH**  
3719 Last evaluated: June 2025; Last change in preferred values: June 2009.

3720

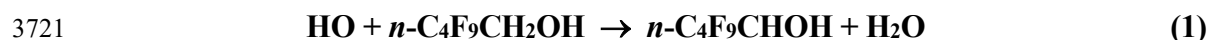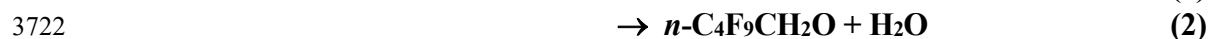

3723

3724 **Rate coefficient data ( $k = k_1 + k_2$ )**

3725

| $k/\text{cm}^3 \text{ molecule}^{-1} \text{ s}^{-1}$ | $T/\text{K}$ | Reference            | Technique/ Comments |
|------------------------------------------------------|--------------|----------------------|---------------------|
| <i>Relative Rate Coefficients</i>                    |              |                      |                     |
| $(9.4 \pm 0.8) \times 10^{-14}$                      | 296          | Hurley et al. (2004) | RR (a)              |

3726

3727

3728

### Comments

3729 (a) HO radicals were generated by the photolysis of CH<sub>3</sub>ONO in 700 Torr (933 mbar) of air.  
3730 Experiments were performed with C<sub>x</sub>F<sub>2x+1</sub>CH<sub>2</sub>OH (x= 1, 2, 3, and 4). There was no discernable  
3731 difference in the reactivity of C<sub>x</sub>F<sub>2x+1</sub>CH<sub>2</sub>OH molecules investigated and the composite data set was  
3732 analyzed together. A rate coefficient ratio of  $k(\text{HO} + \text{C}_x\text{F}_{2x+1}\text{CH}_2\text{OH})/k(\text{HO} + \text{C}_2\text{H}_2) = 0.12 \pm 0.01$  was  
3733 reported. Using  $k(\text{HO} + \text{C}_2\text{H}_2) = 7.8 \times 10^{-13} \text{ cm}^3 \text{ molecule}^{-1} \text{ s}^{-1}$  (Atkinson et al., 2006) gives  
3734  $k(\text{HO} + \text{C}_4\text{F}_9\text{CH}_2\text{OH}) = (9.4 \pm 0.8) \times 10^{-14} \text{ cm}^3 \text{ molecule}^{-1} \text{ s}^{-1}$ .

3735

3736

3737

### Preferred Values

| Parameter                                              | Value                 | $T/\text{K}$ |
|--------------------------------------------------------|-----------------------|--------------|
| $k / \text{cm}^3 \text{ molecule}^{-1} \text{ s}^{-1}$ | $9.4 \times 10^{-14}$ | 298          |
| <i>Reliability</i>                                     |                       |              |
| $\Delta \log k$                                        | $\pm 0.15$            | 298          |

3740

3741 *Comments on Preferred Values*

3742

3743 The preferred value is based upon the sole study of this reaction by Hurley et al. (2004).

3744

3745

### References

3746

3747 Atkinson, R., Baulch, D. L., Cox, R. A., Crowley, J. N., Hampson, R. F., Hynes, R. G., Jenkin, M. E.,  
3748 Rossi, M. J., and Troe, J.: Atmos. Chem. Phys., 6, 3625, 2006; IUPAC Subcommittee for Gas Kinetic  
3749 Data Evaluation, <https://iupac.aeris-data.fr/>.

3750 Hurley, M. D., Wallington, T. J., Andersen, M. P. S., Ellis, D. A., Martin, J. W., and Mabury, S. A.: J.  
3751 Phys. Chem. A, 108, 1973, 2004.

3752

3753

3754

3755 **oFOx93: HO + *n*-C<sub>4</sub>F<sub>9</sub>CH<sub>2</sub>CH<sub>2</sub>OH**  
 3756 Last evaluated: June 2025; Last change in preferred values: June 2009.

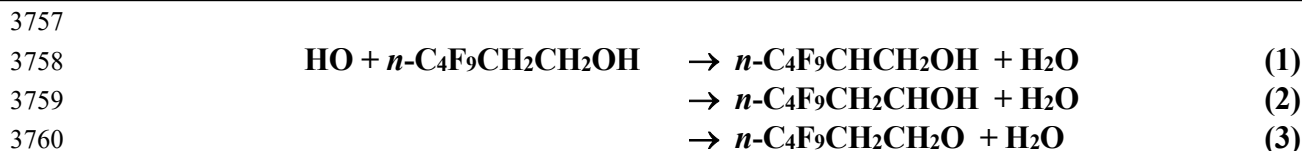

3761 **Rate coefficient data ( $k = k_1 + k_2 + k_3$ )**

| $k/\text{cm}^3 \text{ molecule}^{-1} \text{ s}^{-1}$ | $T/\text{K}$ | Reference           | Technique/ Comments |
|------------------------------------------------------|--------------|---------------------|---------------------|
| <i>Relative Rate Coefficients</i>                    |              |                     |                     |
| $(0.92 \pm 0.12) \times 10^{-12}$                    | 296          | Ellis et al. (2003) | RR (a)              |
| $(1.03 \pm 0.14) \times 10^{-12}$                    | 296          |                     |                     |

3764

3765 **Comments**

3766

3767 (a) HO radicals were generated by the photolysis of CH<sub>3</sub>ONO in 700 Torr (933 mbar) of air.

3768 Experiments were performed with *n*-C<sub>4</sub>F<sub>9</sub>CH<sub>2</sub>CH<sub>2</sub>OH, *n*-C<sub>6</sub>F<sub>13</sub>CH<sub>2</sub>CH<sub>2</sub>OH, and *n*-

3769 C<sub>8</sub>F<sub>17</sub>CH<sub>2</sub>CH<sub>2</sub>OH. There was no discernable difference in the reactivity of the three alcohols and the

3770 composite data set was analyzed together. Rate coefficient ratios of

3771  $k(\text{HO} + \text{C}_x\text{F}_{2x+1}\text{CH}_2\text{CH}_2\text{OH})/k(\text{HO} + \text{C}_2\text{H}_2) = 1.18 \pm 0.15$  and  $k(\text{HO} + \text{C}_x\text{F}_{2x+1}\text{CH}_2\text{CH}_2\text{OH})/$

3772  $k(\text{HO} + \text{C}_2\text{H}_4) = 0.131 \pm 0.018$  were reported. Using  $k(\text{HO} + \text{C}_2\text{H}_2) = 7.8 \times 10^{-13}$  and  $k(\text{HO} + \text{C}_2\text{H}_2) =$

3773  $7.9 \times 10^{-12} \text{ cm}^3 \text{ molecule}^{-1} \text{ s}^{-1}$  (Atkinson et al., 2006) gives  $k(\text{HO} + n\text{-C}_4\text{F}_9\text{CH}_2\text{CH}_2\text{OH}) = (0.92 \pm$

3774  $0.12) \times 10^{-12}$  and  $(1.03 \pm 0.14) \times 10^{-12} \text{ cm}^3 \text{ molecule}^{-1} \text{ s}^{-1}$ .

3775

3776 **Preferred Values**

| Parameter                                            | Value                 | $T/\text{K}$ |
|------------------------------------------------------|-----------------------|--------------|
| $k/\text{cm}^3 \text{ molecule}^{-1} \text{ s}^{-1}$ | $1.0 \times 10^{-12}$ | 298          |
| <i>Reliability</i>                                   |                       |              |
| $\Delta \log k$                                      | 0.15                  | 298          |

3777

3778 **Comments on Preferred Values**

3781

3782

3783 The preferred value is based upon the average of the two determinations by Ellis et al. (2003). As

3784 discussed by Calvert et al. (2011), HO radicals are approximately an order of magnitude less reactive

3785 towards C<sub>x</sub>F<sub>2x+1</sub>CH<sub>2</sub>OH than towards C<sub>x</sub>F<sub>2x+1</sub>CH<sub>2</sub>CH<sub>2</sub>OH and presumably the majority (>90%) of

3786 reaction of HO with *n*-C<sub>4</sub>F<sub>9</sub>CH<sub>2</sub>CH<sub>2</sub>OH proceeds via attack on the terminal –CH<sub>2</sub>– group. As with

3787 other α-hydroxy alkyl radicals, the atmospheric fate of *n*-C<sub>4</sub>F<sub>9</sub>CH<sub>2</sub>CHOH radicals will be reaction

3788 with O<sub>2</sub> to give the corresponding aldehyde.

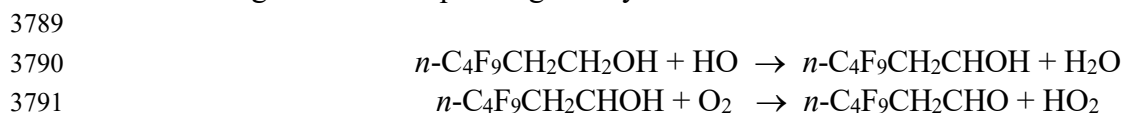

3792

3793 Product studies of the chlorine atom initiated oxidation of *n*-C<sub>4</sub>F<sub>9</sub>CH<sub>2</sub>CH<sub>2</sub>OH in 700 Torr of air at 296

3794 K by Hurley et al. (2004) and Andersen et al. (2005) have shown that *n*-C<sub>4</sub>F<sub>9</sub>CH<sub>2</sub>CH<sub>2</sub>OH is oxidized

3795 to give *n*-C<sub>4</sub>F<sub>9</sub>CH<sub>2</sub>CHO in a yield which is indistinguishable from 100%.

3796

## References

- 3797  
3798  
3799 Andersen, M. P. S., Nielsen, O. J., Hurley, M. D., Ball, J. C., Wallington, T. J., Ellis, D. A., Martin, J. W.,  
3800 and Mabury, S. A.: *J. Phys. Chem. A*, 109, 1849, 2005.
- 3801 Atkinson, R., Baulch, D. L., Cox, R. A., Crowley, J. N., Hampson, R. F., Hynes, R. G., Jenkin, M. E.,  
3802 Rossi, M. J., and Troe, J.: *Atmos. Chem. Phys.*, 6, 3625, 2006; IUPAC Subcommittee for Gas Kinetic  
3803 Data Evaluation, <https://iupac.aeris-data.fr/>.
- 3804 Calvert, J. G., Mellouki, A., Orlando, J. J., Pilling, M., and Wallington T. J.: *The Mechanisms of*  
3805 *Atmospheric Oxidation of the Oxygenates*, Oxford University Press, New York, NY, 2011.
- 3806 Ellis, D. A., Martin, J. W., Mabury, S. A., Hurley, M. D., Andersen, M. P. S., and Wallington, T. J.:  
3807 *Environ. Sci. Technol.*, 37, 3816, 2003.
- 3808 Hurley, M. D., Ball, J. C., Wallington, T. J., Andersen, M. P. S., Ellis, D. A., Martin, J. W. and Mabury, S.  
3809 A.: *J. Phys. Chem. A*, 108, 5635, 2004.
- 3810

3811 **oFOx94: HO + *n*-C<sub>6</sub>F<sub>13</sub>CH<sub>2</sub>CH<sub>2</sub>OH**  
 3812 Last evaluated: June 2025; Last change in preferred values: June 2009.

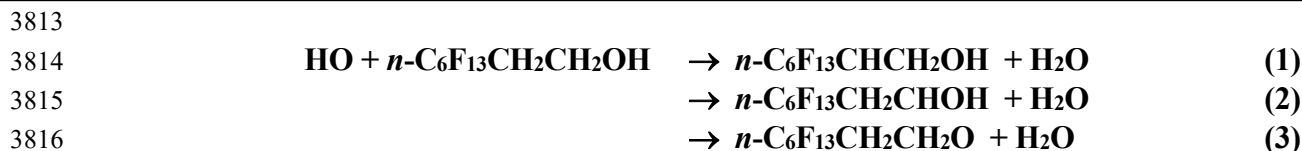

3818 **Rate coefficient data ( $k = k_1 + k_2 + k_3$ )**  
 3819

| $k/\text{cm}^3 \text{ molecule}^{-1} \text{ s}^{-1}$ | $T/\text{K}$ | Reference           | Technique/<br>Comments |
|------------------------------------------------------|--------------|---------------------|------------------------|
| <i>Relative Rate Coefficients</i>                    |              |                     |                        |
| $(9.2 \pm 1.2) \times 10^{-13}$                      | 296          | Ellis et al. (2003) | RR (a)                 |
| $(7.79 \pm 0.35) \times 10^{-13}$                    | 298          | Kelly et al. (2005) | RR (b)                 |
| $(7.91 \pm 0.53) \times 10^{-13}$                    | 298          |                     | RR (b)                 |

3820  
 3821 **Comments**  
 3822

- 3823 (a) HO radicals were generated by the photolysis of CH<sub>3</sub>ONO in 700 Torr (933 mbar) of air.  
 3824 Experiments were performed with *n*-C<sub>4</sub>F<sub>9</sub>CH<sub>2</sub>CH<sub>2</sub>OH, *n*-C<sub>6</sub>F<sub>13</sub>CH<sub>2</sub>CH<sub>2</sub>OH, and *n*-  
 3825 C<sub>8</sub>F<sub>17</sub>CH<sub>2</sub>CH<sub>2</sub>OH. There was no discernable difference in the reactivity of the three alcohols and the  
 3826 composite data set was analyzed together. A rate coefficient ratio of  
 3827  $k(\text{HO} + \text{C}_x\text{F}_{2x+1}\text{CH}_2\text{CH}_2\text{OH})/k(\text{HO} + \text{C}_2\text{H}_2) = 1.18 \pm 0.15$  was reported. Using  $k(\text{HO} + \text{C}_2\text{H}_2) = 7.8 \times$   
 3828  $10^{-13} \text{ cm}^3 \text{ molecule}^{-1} \text{ s}^{-1}$  (Atkinson et al., 2006) gives  $k(\text{HO} + n\text{-C}_6\text{F}_{13}\text{CH}_2\text{CH}_2\text{OH}) = (9.2 \pm 1.2) \times 10^{-13}$   
 3829  $\text{ cm}^3 \text{ molecule}^{-1} \text{ s}^{-1}$ .  
 3830 (b) HO radicals were generated by the photolysis of either H<sub>2</sub>O<sub>2</sub> or O<sub>3</sub> (in the presence of H<sub>2</sub>O vapor) in  
 3831 one atmosphere of air. Experiments were performed using two different reference compounds;  
 3832 HC(O)OC<sub>4</sub>H<sub>9</sub> and *n*-C<sub>6</sub>H<sub>14</sub>. Rate coefficient ratios of  
 3833  $k(\text{HO} + \text{C}_6\text{F}_{13}\text{CH}_2\text{CH}_2\text{OH})/k(\text{HO} + \text{HC}(\text{O})\text{OC}_4\text{H}_9) = 0.22 \pm 0.01$  and  
 3834  $k(\text{HO} + \text{C}_6\text{F}_{13}\text{CH}_2\text{CH}_2\text{OH})/k(\text{HO} + n\text{-C}_6\text{H}_{14}) = 0.15 \pm 0.01$  were reported. Using  $k(\text{HO} + \text{HC}(\text{O})\text{OC}_4\text{H}_9)$   
 3835  $= 3.54 \times 10^{-12}$  (Le Calvé et al., 1997) and  $k(\text{HO} + n\text{-C}_6\text{H}_{14}) = 3.27 \times 10^{-12} \text{ cm}^3 \text{ molecule}^{-1} \text{ s}^{-1}$  (Calvert  
 3836 et al., 2008) gives  $k(\text{HO} + n\text{-C}_6\text{F}_{13}\text{CH}_2\text{CH}_2\text{OH}) = (7.79 \pm 0.35) \times 10^{-13}$  and  $(7.91 \pm 0.53) \times 10^{-13} \text{ cm}^3$   
 3837  $\text{ molecule}^{-1} \text{ s}^{-1}$ .  
 3838

3839 **Preferred Values**  
 3840

| Parameter                                              | Value                 | $T/\text{K}$ |
|--------------------------------------------------------|-----------------------|--------------|
| $k / \text{cm}^3 \text{ molecule}^{-1} \text{ s}^{-1}$ | $8.3 \times 10^{-13}$ | 298          |
| <i>Reliability</i>                                     |                       |              |
| $\Delta \log k$                                        | 0.15                  | 298          |

3841  
 3842 **Comments on Preferred Values**  
 3843

3844 The rate coefficients reported in the relative rate studies by Ellis et al. (2003) and Kelly et al.  
 3845 (2005) are in agreement and an average gives our preferred value. As discussed by Calvert et al. (2011),  
 3846 HO radicals are approximately an order of magnitude less reactive towards C<sub>x</sub>F<sub>2x+1</sub>CH<sub>2</sub>CH<sub>2</sub>OH than  
 3847 towards C<sub>x</sub>F<sub>2x+1</sub>CH<sub>2</sub>CH<sub>2</sub>OH and it seems likely that the majority (>90%) of reaction of HO with *n*-  
 3848 C<sub>6</sub>F<sub>13</sub>CH<sub>2</sub>CH<sub>2</sub>OH proceeds via attack on the terminal –CH<sub>2</sub>– group. As with other α-hydroxy alkyl  
 3849  
 3850

3851 radicals, the atmospheric fate of  $n\text{-C}_6\text{F}_{13}\text{CH}_2\text{CHOH}$  radicals will be reaction with  $\text{O}_2$  to give the  
3852 corresponding aldehyde.

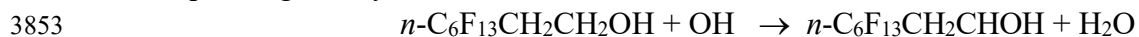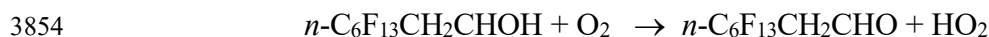

3855

3856

### References

3857

3858 Andersen, M. P. S., Nielsen, O. J., Hurley, M. D., Ball, J. C., Wallington, T. J., Ellis, D. A., Martin, J. W.,  
3859 and Mabury, S. A.: J. Phys. Chem. A, 109, 1849, 2005.

3860 Atkinson, R., Baulch, D. L., Cox, R. A., Crowley, J. N., Hampson, R. F., Hynes, R. G., Jenkin, M. E.,  
3861 Rossi, M. J., and Troe, J.: Atmos. Chem. Phys., 6, 3625, 2006; IUPAC Subcommittee for Gas Kinetic  
3862 Data Evaluation, <https://iupac.aeris-data.fr/>.

3863 Calvert, J.G., R.G. Derwent, J.J. Orlando, G.S. Tyndall, and T.J. Wallington, (2008), The Mechanisms of  
3864 Atmospheric Oxidation of the Alkanes, Oxford University Press, New York.

3865 Calvert, J. G., Mellouki, A., Orlando, J. J., Pilling, M., and Wallington T. J.: The Mechanisms of  
3866 Atmospheric Oxidation of the Oxygenates, Oxford University Press, New York, NY, 2011.

3867 Ellis, D. A., Martin, J. W., Mabury, S. A., Hurley, M. D., Andersen, M. P. S., and Wallington, T. J.:  
3868 Environ. Sci. Technol., 37, 3816, 2003.

3869 Kelly, T., Bossoutrot, V., Magneron, I., Wirtz, K., Treacy, J., Mellouki, A., Sidebottom, H., and Le Bras,  
3870 G.: J. Phys. Chem. A, 109, 347, 2005.

3871 Le Calvé, S., Le Bras, G., and Mellouki, A.: J. Phys. Chem. A 101, 5489, 1997.

3872

3873

3874 **oFOx95: HO + *n*-C<sub>6</sub>F<sub>13</sub>CH<sub>2</sub>CH<sub>2</sub>OH**  
 3875 Last evaluated: June 2025; Last change in preferred values: June 2009.

3876

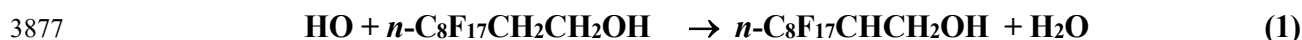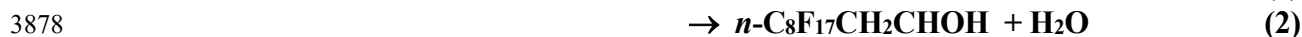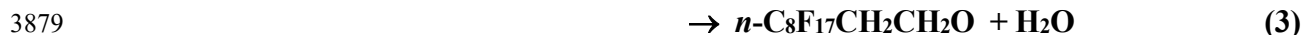

3880

3881 **Rate coefficient data ( $k = k_1 + k_2 + k_3$ )**

3882

| $k/\text{cm}^3 \text{ molecule}^{-1} \text{ s}^{-1}$ | $T/\text{K}$ | Reference           | Technique/ Comments |
|------------------------------------------------------|--------------|---------------------|---------------------|
| <i>Relative Rate Coefficients</i>                    |              |                     |                     |
| $(9.2 \pm 1.2) \times 10^{-13}$                      | 296          | Ellis et al. (2003) | RR (a)              |

3883

3884

3885

### Comments

3886 (a) HO radicals were generated by the photolysis of CH<sub>3</sub>ONO in 700 Torr (933 mbar) of air.  
 3887 Experiments were performed with *n*-C<sub>4</sub>F<sub>9</sub>CH<sub>2</sub>CH<sub>2</sub>OH, *n*-C<sub>6</sub>F<sub>13</sub>CH<sub>2</sub>CH<sub>2</sub>OH, and *n*-  
 3888 C<sub>8</sub>F<sub>17</sub>CH<sub>2</sub>CH<sub>2</sub>OH. There was no discernable difference in the reactivity of the three alcohols and the  
 3889 composite data set was analyzed together. A rate coefficient ratio of  
 3890  $k(\text{HO} + \text{C}_x\text{F}_{2x+1}\text{CH}_2\text{CH}_2\text{OH})/k(\text{HO} + \text{C}_2\text{H}_5) = 1.18 \pm 0.15$  was reported. Using  $k(\text{HO} + \text{C}_2\text{H}_5) = 7.8 \times$   
 3891  $10^{-13} \text{ cm}^3 \text{ molecule}^{-1} \text{ s}^{-1}$  (Atkinson et al., 2006) gives  $k(\text{HO} + n\text{-C}_8\text{F}_{17}\text{CH}_2\text{CH}_2\text{OH}) = (9.2 \pm 1.2) \times 10^{-$   
 3892  $13 \text{ cm}^3 \text{ molecule}^{-1} \text{ s}^{-1}$ .

3893

3894

3895

### Preferred Values

| Parameter                                            | Value                 | $T/\text{K}$ |
|------------------------------------------------------|-----------------------|--------------|
| $k/\text{cm}^3 \text{ molecule}^{-1} \text{ s}^{-1}$ | $9.2 \times 10^{-13}$ | 298          |
| <i>Reliability</i>                                   |                       |              |
| $\Delta \log k$                                      | 0.15                  | 298          |

3896

3897

3898

### Comments on Preferred Values

3900

3901 The rate coefficient reported by Ellis et al. (2003) is adopted as the preferred value. As discussed  
 3902 by Calvert et al. (2011), HO radicals are approximately an order of magnitude less reactive towards  
 3903 C<sub>*x*</sub>F<sub>2*x*+1</sub>CH<sub>2</sub>OH than towards C<sub>*x*</sub>F<sub>2*x*+1</sub>CH<sub>2</sub>CH<sub>2</sub>OH and it seems likely that the majority (>90%) of  
 3904 reaction of HO with *n*-C<sub>8</sub>F<sub>17</sub>CH<sub>2</sub>CH<sub>2</sub>OH proceeds via attack on the terminal –CH<sub>2</sub>– group. As with  
 3905 other  $\alpha$ -hydroxy alkyl radicals, the atmospheric fate of *n*-C<sub>8</sub>F<sub>17</sub>CH<sub>2</sub>CHOH radicals will be reaction  
 3906 with O<sub>2</sub> to give the corresponding aldehyde.

3907

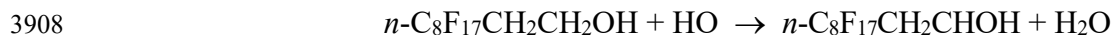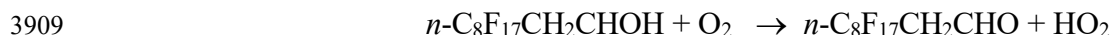

3910

3911 It is expected that the HO radical initiated oxidation of *n*-C<sub>8</sub>F<sub>17</sub>CH<sub>2</sub>CH<sub>2</sub>OH will lead to the formation  
 3912 of *n*-C<sub>8</sub>F<sub>17</sub>CH<sub>2</sub>CHO in a yield of essentially 100%. Consistent with this expectation, Chiappero et al.  
 3913 (2008) measured a  $92 \pm 7\%$  yield of *n*-C<sub>8</sub>F<sub>17</sub>CH<sub>2</sub>CHO in the chlorine-atom initiated oxidation of *n*-  
 3914 C<sub>8</sub>F<sub>17</sub>CH<sub>2</sub>CH<sub>2</sub>OH (8:2 FTOH) in 700 Torr of air.

3915

3916

## References

- 3917  
3918  
3919 Atkinson, R., Baulch, D. L., Cox, R. A., Crowley, J. N., Hampson, R. F., Hynes, R. G., Jenkin, M. E.,  
3920 Rossi, M. J., and Troe, J.: *Atmos. Chem. Phys.*, 6, 3625, 2006; IUPAC Subcommittee for Gas Kinetic  
3921 Data Evaluation, <https://iupac.aeris-data.fr/>.  
3922 Calvert, J. G., Mellouki, A., Orlando, J. J., Pilling, M., and Wallington T. J.: *The Mechanisms of*  
3923 *Atmospheric Oxidation of the Oxygenates*, Oxford University Press, New York, NY, 2011.  
3924 Chiappero, M. S., Argüello, G. A., Hurley, M. D., and Wallington, T. J.: *Chem. Phys. Lett.*, 461, 198,  
3925 2008.  
3926 Ellis, D. A., Martin, J. W., Mabury, S. A., Hurley, M. D., Andersen, M. P. S., and Wallington, T. J.:  
3927 *Environ. Sci. Technol.*, 37, 3816, 2003.  
3928  
3929

3930 **oFOx96: HO + CF<sub>3</sub>CH(OH)<sub>2</sub>**  
 3931 Last evaluated: June 2025; Last change in preferred values: June 2009.

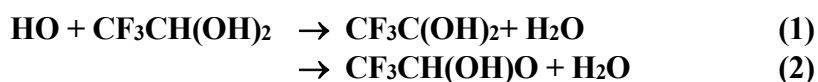

3935 **Rate coefficient data ( $k = k_1 + k_2$ )**

| $k/\text{cm}^3 \text{ molecule}^{-1} \text{ s}^{-1}$ | T/K | Reference              | Technique/ Comments |
|------------------------------------------------------|-----|------------------------|---------------------|
| <i>Relative Rate Coefficients</i>                    |     |                        |                     |
| $(1.18 \pm 0.11) \times 10^{-12}$                    | 296 | Andersen et al. (2006) | RR (a)              |
| $(1.14 \pm 0.12) \times 10^{-12}$                    | 296 |                        |                     |

3938 **Comments**

- 3939  
 3940  
 3941 (a) HO radicals were generated by the photolysis of CH<sub>3</sub>ONO in 700 Torr (933 mbar) of air. Separate  
 3942 experiments were performed using C<sub>2</sub>H<sub>2</sub> and C<sub>2</sub>H<sub>4</sub> as references. Rate coefficient ratios of  
 3943  $k(\text{HO} + \text{CF}_3\text{CH}(\text{OH})_2)/k(\text{HO} + \text{C}_2\text{H}_2) = 0.146 \pm 0.015$  and  $k(\text{HO} + \text{CF}_3\text{CH}(\text{OH})_2)/k(\text{HO} + \text{C}_2\text{H}_4) =$   
 3944  $0.0149 \pm 0.0014$  were reported. Using  $k(\text{HO} + \text{C}_2\text{H}_2) = 7.8 \times 10^{-13}$  and  $k(\text{HO} + \text{C}_2\text{H}_4) = 7.9 \times 10^{-12} \text{ cm}^3$   
 3945  $\text{molecule}^{-1} \text{ s}^{-1}$  (Atkinson et al., 2006) gives  $k(\text{HO} + \text{CF}_3\text{CH}(\text{OH})_2) = (1.14 \pm 0.12) \times 10^{-13}$  and  $(1.18 \pm$   
 3946  $0.11) \times 10^{-13} \text{ cm}^3 \text{ molecule}^{-1} \text{ s}^{-1}$ .

3947 **Preferred Values**

| Parameter                                              | Value                 | T/K |
|--------------------------------------------------------|-----------------------|-----|
| $k / \text{cm}^3 \text{ molecule}^{-1} \text{ s}^{-1}$ | $1.2 \times 10^{-13}$ | 298 |
| <i>Reliability</i>                                     |                       |     |
| $\Delta \log k$                                        | 0.20                  | 298 |

3948 **Comments on Preferred Values**

3949  
 3950  
 3951  
 3952  
 3953 The preferred value is based upon the average of the two determinations by Andersen et al.  
 3954 (2006). Andersen et al. (2006) reported that the chlorine atom initiated oxidation of CF<sub>3</sub>CH(OH)<sub>2</sub> in  
 3955 700 Torr (933 mbar) of air gives CF<sub>3</sub>C(O)OH in a molar yield of  $101 \pm 6\%$ . The HO radical initiated of  
 3956 CF<sub>3</sub>CH(OH)<sub>2</sub> is expected to give CF<sub>3</sub>C(O)OH in essentially 100% yield.

3957 **References**

- 3958 Andersen, M. P. S., Nielsen, O. J., Hurley, M. D., Ball, J. C., Wallington, T. J., Ellis, D. A., Martin, J. W.,  
 3959 and Mabury, S. A.: J. Phys. Chem. A, 109, 1849, 2005.  
 3960 Atkinson, R., Baulch, D. L., Cox, R. A., Crowley, J. N., Hampson, R. F., Hynes, R. G., Jenkin, M. E.,  
 3961 Rossi, M. J., and Troe, J.: Atmos. Chem. Phys., 6, 3625, 2006; IUPAC Subcommittee for Gas Kinetic  
 3962 Data Evaluation, <https://iupac.aeris-data.fr/>.

3968 **oClOx90: HO + CH<sub>2</sub>ClCH<sub>2</sub>OH**  
 3969 Last evaluated: June 2025; Last change in preferred values: June 2009

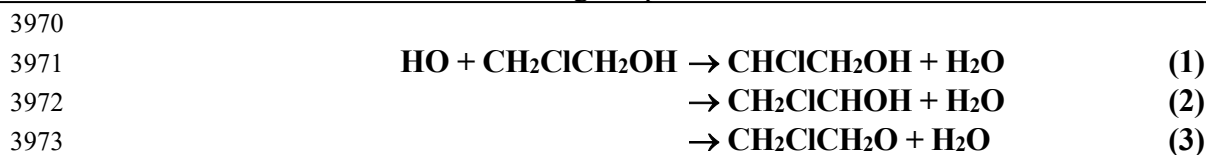

3974  
 3975 **Rate coefficient data ( $k = k_1 + k_2 + k_3$ )**  
 3976

| $k/\text{cm}^3 \text{ molecule}^{-1} \text{ s}^{-1}$ | $T/\text{K}$ | Reference                | Technique/<br>Comments |
|------------------------------------------------------|--------------|--------------------------|------------------------|
| <i>Absolute Rate Coefficients</i>                    |              |                          |                        |
| $(1.28 \pm 0.09) \times 10^{-12}$                    | 298          | Wallington et al. (1988) | FP-RF (a)              |

3977  
 3978 **Comments**

3979  
 3980 (a) HO radicals were generated by the photolysis ( $\lambda \geq 165 \text{ nm}$ ) of H<sub>2</sub>O in 25-50 Torr (33-67 mbar) of  
 3981 argon at 298 K.

3982  
 3983 **Preferred Values**

| Parameter                                              | Value                 | $T/\text{K}$ |
|--------------------------------------------------------|-----------------------|--------------|
| $k / \text{cm}^3 \text{ molecule}^{-1} \text{ s}^{-1}$ | $1.3 \times 10^{-12}$ | 298          |
| <i>Reliability</i>                                     |                       |              |
| $\Delta \log k$                                        | 0.20                  | 298          |

3987  
 3988 *Comments on Preferred Values*

3989  
 3990 The absolute rate coefficient reported by Wallington et al. (1988) is adopted as the preferred value.  
 3991 The enhanced uncertainty reflects the fact that there is only one study available.

3992  
 3993  
 3994 **References**

3995  
 3996 Wallington, T. J., Dagaut, P., and Kurylo, M. J.: J. Phys. Chem., 92, 5024, 1988.

3997  
 3998

3999 **oClOx91: HO + CCl<sub>3</sub>CH<sub>2</sub>OH**  
4000 Last evaluated: June 2023; Last change in preferred values: June 2009.

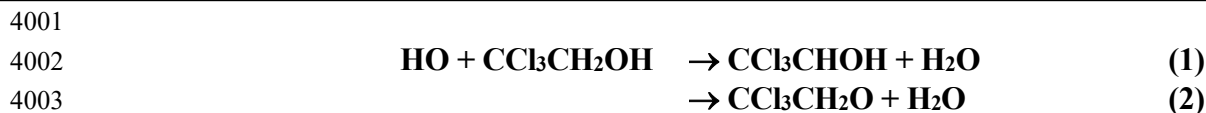

4004  
4005 **Rate coefficient data ( $k = k_1 + k_2$ )**  
4006

| $k/\text{cm}^3 \text{ molecule}^{-1} \text{ s}^{-1}$ | $T/\text{K}$ | Reference                | Technique/ Comments |
|------------------------------------------------------|--------------|--------------------------|---------------------|
| <i>Absolute Rate Coefficients</i>                    |              |                          |                     |
| $(2.45 \pm 0.24) \times 10^{-13}$                    | 298          | Wallington et al. (1988) | FP-RF (a)           |

4007  
4008 **Comments**

4009  
4010 (a) HO radicals were generated by the photolysis ( $\lambda \geq 165 \text{ nm}$ ) of H<sub>2</sub>O in 25-50 Torr (33-67 mbar) of  
4011 argon at 298 K.

4012  
4013 **Preferred Values**

| Parameter                                              | Value                  | T/K |
|--------------------------------------------------------|------------------------|-----|
| $k / \text{cm}^3 \text{ molecule}^{-1} \text{ s}^{-1}$ | $2.45 \times 10^{-13}$ | 298 |
| <i>Reliability</i><br>$\Delta \log k$                  | 0.20                   | 298 |

4017  
4018 *Comments on Preferred Values*

4019  
4020 The absolute rate coefficient reported by Wallington et al. (1988) forms the basis of the preferred  
4021 value. The enhanced uncertainty reflects the fact that there is only one study available.

4022  
4023 **References**

4024  
4025  
4026 Wallington, T. J., Dagaut, P., and Kurylo, M. J.: J. Phys. Chem., 92, 5024, 1988.

4027

4030  
 4031  
 4032  
 4033  
 4034  
 4035

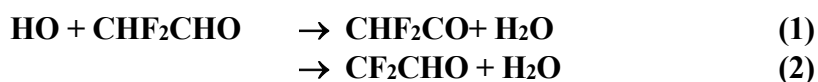

**Rate coefficient data ( $k = k_1 + k_2$ )**

| $k/\text{cm}^3 \text{ molecule}^{-1} \text{ s}^{-1}$ | $T/\text{K}$ | Reference              | Technique/ Comments |
|------------------------------------------------------|--------------|------------------------|---------------------|
| <i>Absolute Rate Coefficients</i>                    |              |                        |                     |
| $(1.7 \pm 0.2) \times 10^{-12}$                      | 298          | Scollard et al. (1993) | PLP-RF (a)          |
| <i>Relative Rate Coefficients</i>                    |              |                        |                     |
| $(1.32 \pm 0.28) \times 10^{-12}$                    | 298          | Scollard et al. (1993) | RR (b)              |
| $(1.79 \pm 0.05) \times 10^{-12}$                    | 298          | Sellevåg et al. (2005) | RR (c)              |

4036  
 4037  
 4038

**Comments**

- 4039 (a) HO radicals were generated by the 248 nm photolysis of nitric acid in argon at 15-100 Torr (20 - 133  
 4040 mbar) pressure. Laser fluence was varied in the range 150-300 mJ/pulse with no discernable effect  
 4041 on the rate coefficient measured suggesting the absence of complications from photolysis of  
 4042 CHF<sub>2</sub>CHO.
- 4043 (b) HO radicals were generated by the photolysis of CH<sub>3</sub>ONO (or C<sub>2</sub>H<sub>5</sub>ONO) in CH<sub>3</sub>ONO (or  
 4044 C<sub>2</sub>H<sub>5</sub>ONO)-NO-CHF<sub>2</sub>CHO-toluene-air mixtures at 730-750 Torr (973 - 1000 mbar) pressure. The  
 4045 concentrations of CHF<sub>2</sub>CHO and toluene were measured by GC and/or FTIR spectroscopy. Scollard  
 4046 et al. (1993) did not report a value for the rate coefficient ratio  $k(\text{HO} + \text{CHF}_2\text{CHO})/k(\text{HO} + \text{toluene})$ .  
 4047 Dividing the reported value of  $k(\text{HO} + \text{CHF}_2\text{CHO})$  by the value of  $k(\text{HO} + \text{toluene})$  used by  
 4048 Scollard et al. (1993) gives  $k(\text{HO} + \text{CHF}_2\text{CHO})/k(\text{HO} + \text{toluene}) = 0.235 \pm 0.005$  which is placed on  
 4049 an absolute basis in the table above using  $k(\text{HO} + \text{toluene}) = 5.6 \times 10^{-12} \text{ cm}^3 \text{ molecule}^{-1} \text{ s}^{-1}$  at 298 K  
 4050 (Mellouki et al., 2022).
- 4051 (c) HO radicals were generated by the photolysis of O<sub>3</sub> in the presence of H<sub>2</sub> in 1013 mbar of air  
 4052 diluent. Propane was used as the reference compound. The concentrations of CHF<sub>2</sub>CHO and  
 4053 propane were measured by FTIR spectroscopy and a rate coefficient ratio of  $k(\text{HO} +$   
 4054  $\text{CHF}_2\text{CHO})/k(\text{HO} + \text{propane}) = 1.626 \pm 0.042$  was reported. Placing this result on an absolute basis  
 4055 using  $k(\text{HO} + \text{propane}) = 1.1 \times 10^{-12} \text{ cm}^3 \text{ molecule}^{-1} \text{ s}^{-1}$  (Atkinson et al., 2006) gives  $k(\text{HO} +$   
 4056  $\text{CHF}_2\text{CHO}) = (1.79 \pm 0.05) \times 10^{-12} \text{ cm}^3 \text{ molecule}^{-1} \text{ s}^{-1}$ .

4057  
 4058  
 4059

**Preferred Values**

| Parameter                                            | Value                 | $T/\text{K}$ |
|------------------------------------------------------|-----------------------|--------------|
| $k/\text{cm}^3 \text{ molecule}^{-1} \text{ s}^{-1}$ | $1.6 \times 10^{-12}$ | 298          |
| <i>Reliability</i>                                   |                       |              |
| $\Delta \log k$                                      | 0.15                  | 298          |

4062  
 4063  
 4064

*Comments on Preferred Values*

4065 The results from the relative and absolute rate studies by Scollard et al. (1993) and Sellevåg et  
 4066 al. (2005) are in agreement within the combined experimental uncertainties. An average of the results  
 4067 from Scollard et al. (1993) and Sellevåg et al. (2005) gives the preferred value of  $k(\text{OH} + \text{CHF}_2\text{CHO}) =$

4068  $1.6 \times 10^{-12} \text{ cm}^3 \text{ molecule}^{-1} \text{ s}^{-1}$  at 298 K. The reaction probably proceeds predominately via abstraction  
4069 of the aldehydic hydrogen (channel 1) to give CHF<sub>2</sub>C(O) radicals.

4070

4071

### References

4072

4073 Atkinson, R., Baulch, D. L., Cox, R. A., Crowley, J. N., Hampson, R. F., Hynes, R. G., Jenkin, M. E., Rossi,  
4074 M. J., and Troe, J.: *Atmos. Chem. Phys.*, 6, 3625, 2006; IUPAC Task Group on Atmospheric Chemical  
4075 Kinetic Data Evaluation, <https://iupac.aeris-data.fr/>.

4076 Mellouki, A., Ammann, M., Cox, R. A., Crowley, J. N., Herrmann, H., Jenkin, M. E., McNeill, V. F., Troe, J.,  
4077 and Wallington, T. J.: Evaluated kinetic and photochemical data for atmospheric chemistry: Volume VII -  
4078 gas phase reactions of organic species with four, or more, carbon atoms ( $\geq \text{C}_4$ ), *Atmos. Chem. Phys.*, 21,  
4079 4797-4808, 2021; IUPAC Task Group on Atmospheric Chemical Kinetic Data Evaluation,  
4080 <https://iupac.aeris-data.fr/>.

4081 Scollard, D. J., Treacy, J. J., Sidebottom, H. W., Balestra-Garcia, C., Laverdet, G., Le Bras, G., MacLeod, H.,  
4082 and Téton, S.: *J. Phys. Chem.*, 97, 4683, 1993.

4083 Sellevåg, S.R., Stenstrøm, V., Helgaker, T., and Nielsen, C.J.: *J. Phys. Chem. A* 109, 3652, 2005.

4084

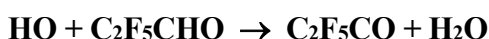

4089 **Rate coefficient data**

| <i>k</i> /cm <sup>3</sup> molecule <sup>-1</sup> s <sup>-1</sup>                                            | <i>T</i> /K    | Reference                      | Technique/ Comments |
|-------------------------------------------------------------------------------------------------------------|----------------|--------------------------------|---------------------|
| 2.56 × 10 <sup>-12</sup> exp[-(458±36)/ <i>T</i> ]<br>(5.57 ± 0.14) × 10 <sup>-13</sup>                     | 263-358<br>298 | Antiñolo et al. (2014)         | PLP-LIF (a)         |
| <i>Relative Rate Coefficients</i><br>(4.63 ± 0.51) × 10 <sup>-13</sup><br>(5.10 ± 0.29) × 10 <sup>-13</sup> | 296            | Sulbaek Andersen et al. (2003) | RR (b)              |

4092 **Comments**

- 4093 (a) HO radicals were produced by 248 nm (KrF eximer laser) photolysis of HNO<sub>3</sub> in 50-205 Torr (67-  
 4094 273 mbar) of helium diluent at 263-358 K. HO radicals were monitored by LIF. No effect of total  
 4095 pressure was reported over the range studied  
 4096 (b) HO radicals were generated by the photolysis of CH<sub>3</sub>ONO in 700 Torr (933 mbar) of air in the  
 4097 presence of NO. C<sub>2</sub>H<sub>2</sub> and C<sub>2</sub>H<sub>4</sub> were used in separate experiments as reference compounds. The  
 4098 loss of C<sub>2</sub>F<sub>5</sub>CHO and the reference compounds were monitored using FTIR spectroscopy. Rate  
 4099 coefficient ratios of  $k(\text{HO}+\text{C}_2\text{F}_5\text{CHO})/k(\text{HO}+\text{C}_2\text{H}_2) = 0.593 \pm 0.065$  and  
 4100  $k(\text{HO}+\text{C}_2\text{F}_5\text{CHO})/k(\text{HO}+\text{C}_2\text{H}_4) = 0.0646 \pm 0.0037$  were reported. Scaling these ratios using  
 4101  $k(\text{HO}+\text{C}_2\text{H}_2) = 7.8 \times 10^{-13}$  and  $k(\text{HO}+\text{C}_2\text{H}_4) = 7.9 \times 10^{-12}$  (Atkinson et al., 2006) gives  $k(\text{HO}+$   
 4102  $\text{C}_2\text{F}_5\text{CHO}) = (4.63 \pm 0.51) \times 10^{-13}$  and  $(5.10 \pm 0.29) \times 10^{-13}$  cm<sup>3</sup> molecule<sup>-1</sup> s<sup>-1</sup>.

4103 **Preferred Values**

| Parameter                                                        | Value                                         | <i>T</i> /K |
|------------------------------------------------------------------|-----------------------------------------------|-------------|
| <i>k</i> /cm <sup>3</sup> molecule <sup>-1</sup> s <sup>-1</sup> | 5.2 × 10 <sup>-13</sup>                       | 298         |
| <i>k</i> /cm <sup>3</sup> molecule <sup>-1</sup> s <sup>-1</sup> | 2.42 × 10 <sup>-12</sup> exp(-458/ <i>T</i> ) | 250-360     |
| <i>Reliability</i>                                               |                                               |             |
| Δ log <i>k</i>                                                   | 0.10                                          | 298         |
| Δ <i>E</i> / <i>R</i>                                            | ± 200                                         | 250-360     |

4104 **Comments on Preferred Values**

4105 The results reported by Sulbaek Andersen et al. (2003) and Antiñolo et al. (2014) near room  
 4106 temperature are in agreement within the likely experimental uncertainties. Taking an average of the  
 4107 results from the two studies gives the preferred value of  $k(\text{OH}+\text{C}_2\text{F}_5\text{CHO}) = 5.2 \times 10^{-13}$  cm<sup>3</sup> molecule<sup>-1</sup>  
 4108 s<sup>-1</sup> at 298 K. Taking the temperature dependence from Antiñolo et al. (2014) and adjusting the A factor  
 4109 to reproduce the preferred rate coefficient at 298 K gives  $k(\text{OH}+\text{C}_2\text{F}_5\text{CHO}) = 2.42 \times 10^{-12}$  exp(-458/*T*)  
 4110 cm<sup>3</sup> molecule<sup>-1</sup> s<sup>-1</sup>. The reaction proceeds via abstraction of the aldehydic hydrogen to give C<sub>2</sub>F<sub>5</sub>C(O)  
 4111 radicals.

4122  
4123  
4124  
4125  
4126  
4127  
4128  
4129  
4130

## References

- Antiñolo, M., Jiménez, E., Gonzalez, S., and Albaladejo, J.: J. Phys. Chem. A, 118, 178, 2014.  
Atkinson, R., Baulch, D. L., Cox, R. A., Crowley, J. N., Hampson, R. F., Hynes, R. G., Jenkin, M. E., Rossi, M. J., and Troe, J.: Atmos. Chem. Phys., 6, 3625, 2006; IUPAC Subcommittee for Gas Kinetic Data Evaluation, <https://iupac.aeris-data.fr/>.  
Sulbaek Andersen, M. P., Hurley, M. D., Wallington, T.J., Ball, J. C., Martin, J. W., Ellis, D.A., Mabury, S. A., and Nielsen, O. J.: Chem. Phys. Lett., 379, 28, 2003.

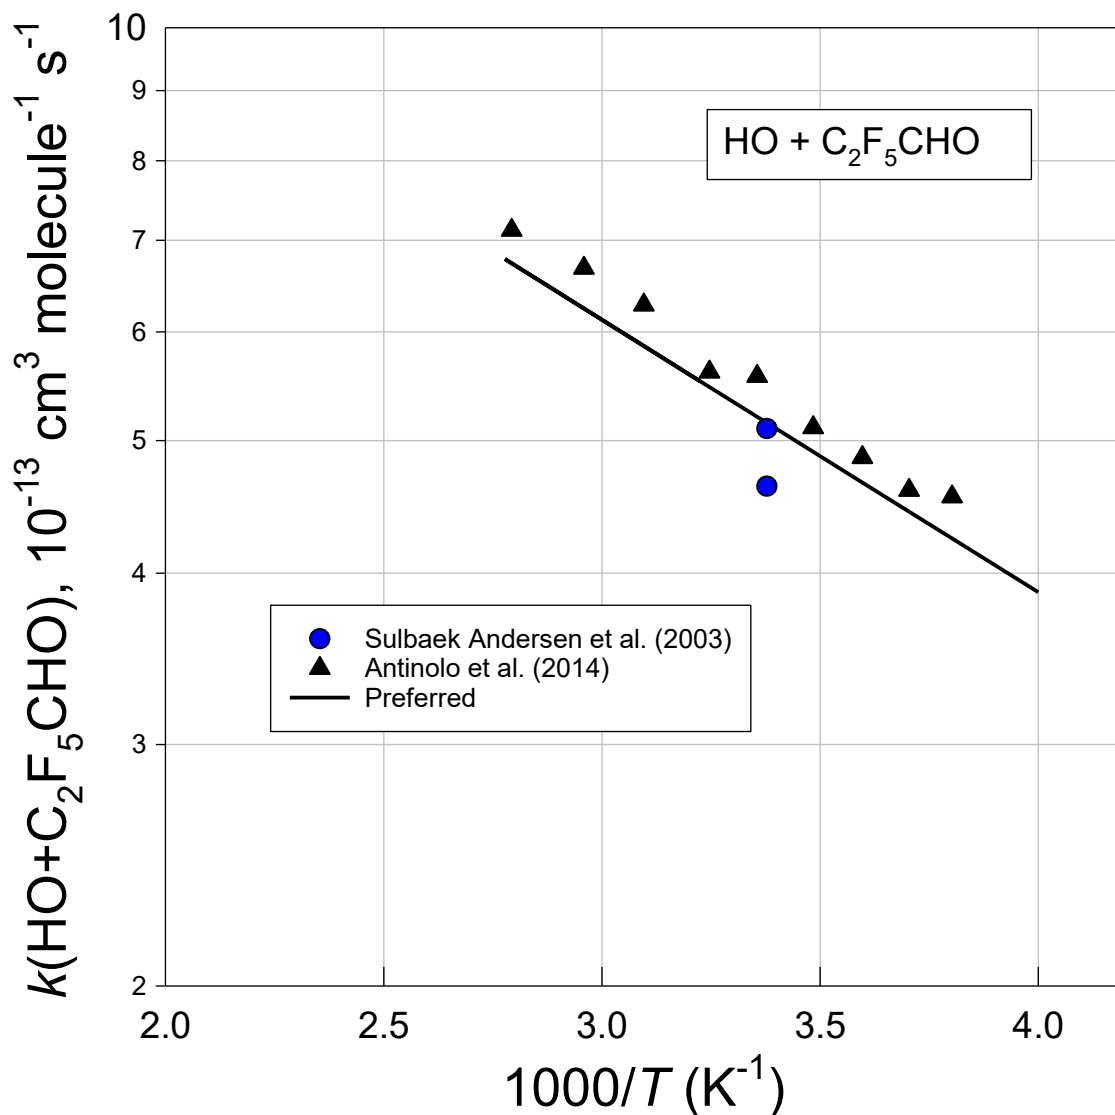

4131  
4132

4133 **oFOx99: HO + n-C<sub>3</sub>F<sub>7</sub>CHO**  
 4134 Last evaluated: June 2025; Last change in preferred values: June 2019.

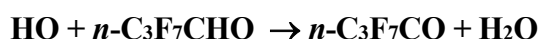

4136 **Rate coefficient data**

| <i>k</i> /cm <sup>3</sup> molecule <sup>-1</sup> s <sup>-1</sup> | <i>T</i> /K | Reference                      | Technique/<br>Comments |
|------------------------------------------------------------------|-------------|--------------------------------|------------------------|
| <i>Absolute Rate Coefficients</i>                                |             |                                |                        |
| (2.0 ± 0.6) × 10 <sup>-12</sup> exp[-(369 ± 90)/ <i>T</i> ]      | 252 - 373   | Solignac et al. (2007)         | PLP-LIF (a)            |
| 5.55 × 10 <sup>-13</sup>                                         | 297         |                                | (b)                    |
| <i>Relative Rate Coefficients</i>                                |             |                                |                        |
| (5.68 ± 0.74) × 10 <sup>-13</sup>                                | 296         | Sulbaek Andersen et al. (2004) | RR (c)                 |
| (6.42 ± 0.75) × 10 <sup>-13</sup>                                |             |                                |                        |

4140 **Comments**

- 4141
- 4142
- 4143 (a) HO radicals were generated by the photolysis of H<sub>2</sub>O<sub>2</sub> at 248 nm in the presence of C<sub>3</sub>F<sub>7</sub>CHO in 100 Torr (133 mbar) of helium diluent.
- 4144
- 4145 (b) Average of values given at 297 K
- 4146 (c) HO radicals were generated by the photolysis of CH<sub>3</sub>ONO in 700 Torr (933 mbar) of air in the presence of NO. C<sub>2</sub>H<sub>2</sub> and C<sub>2</sub>H<sub>4</sub> were used as reference compounds in separate experiments. The loss of C<sub>3</sub>F<sub>7</sub>CHO and the reference compounds were monitored using FTIR spectroscopy. Experiments were performed using CF<sub>3</sub>CHO, C<sub>3</sub>F<sub>7</sub>CHO, and C<sub>4</sub>F<sub>9</sub>CHO. There was no discernable difference in reactivity of the three fluorinated aldehydes. An analysis of the combined data set gave rate coefficient ratios of  $k(\text{HO} + \text{C}_x\text{F}_{2x+1}\text{CHO})/k(\text{HO} + \text{C}_2\text{H}_2) = 0.73 \pm 0.10$  and  $k(\text{HO} + \text{C}_x\text{F}_{2x+1}\text{CHO})/k(\text{HO} + \text{C}_2\text{H}_4) = 0.0813 \pm 0.0095$ . Scaling these ratios using  $k(\text{HO} + \text{C}_2\text{H}_2) = 7.8 \times 10^{-13}$  and  $k(\text{HO} + \text{C}_2\text{H}_4) = 7.9 \times 10^{-12}$  (Atkinson et al., 2006) gives  $k(\text{HO} + \text{C}_x\text{F}_{2x+1}\text{CHO}) = (5.68 \pm 0.74) \times 10^{-13}$  and  $(6.42 \pm 0.75) \times 10^{-13}$  cm<sup>3</sup> molecule<sup>-1</sup> s<sup>-1</sup>.

4155 **Preferred Values**

| Parameter                                                        | Value                                        | <i>T</i> /K |
|------------------------------------------------------------------|----------------------------------------------|-------------|
| <i>k</i> /cm <sup>3</sup> molecule <sup>-1</sup> s <sup>-1</sup> | 5.8 × 10 <sup>-13</sup>                      | 298         |
| <i>k</i> /cm <sup>3</sup> molecule <sup>-1</sup> s <sup>-1</sup> | 2.0 × 10 <sup>-12</sup> exp(-369/ <i>T</i> ) | 250-380     |
| <i>Reliability</i>                                               |                                              |             |
| Δ log <i>k</i>                                                   | 0.08                                         | 298         |
| Δ E/R                                                            | ± 200                                        | 250-380     |

4157 **Comments on Preferred Values**

4158

4159

4160

4161 There is excellent agreement between the absolute rate data reported by Solignac et al. (2007) and the relative rate data reported by Sulbaek Andersen et al. (2004) at temperatures near 298K. The Arrhenius expression  $k(\text{HO} + \text{C}_3\text{F}_7\text{CHO}) = 2.0 \times 10^{-12} \exp(-369/T)$  from Solignac et al. (2007) is preferred and gives  $5.8 \times 10^{-13}$  cm<sup>3</sup> molecule<sup>-1</sup> s<sup>-1</sup> at 298 K. As shown by Sulbaek Andersen et al. (2004), the reaction proceeds via abstraction of the aldehydic hydrogen to give C<sub>3</sub>F<sub>7</sub>C(O) radicals.

4162

4163

4164

4165

4166

4167

4168

4169  
4170  
4171  
4172  
4173  
4174  
4175  
4176  
4177  
4178  
4179

## References

- Atkinson, R., Baulch, D. L., Cox, R. A., Crowley, J. N., Hampson, R. F., Hynes, R. G., Jenkin, M. E., Rossi, M. J., and Troe, J.: *Atmos. Chem. Phys.*, 6, 3625, 2006; IUPAC Subcommittee for Gas Kinetic Data Evaluation, <https://iupac.aeris-data.fr/>.
- Solignac, G., Mellouki, A., Le Bras, G., Mu, Y., and Sidebottom, H.: *Phys. Chem. Chem. Phys.*, 9, 4200, 2007.
- Sulbaek Andersen, M. P., Nielsen, O. J., Hurley, M. D., Ball, J. C., Wallington, T. J., Stevens, J. E., Martin, J. W., Ellis, D. A., and Mabury, S.A.: *J. Phys. Chem. A*, 108, 5189, 2004.

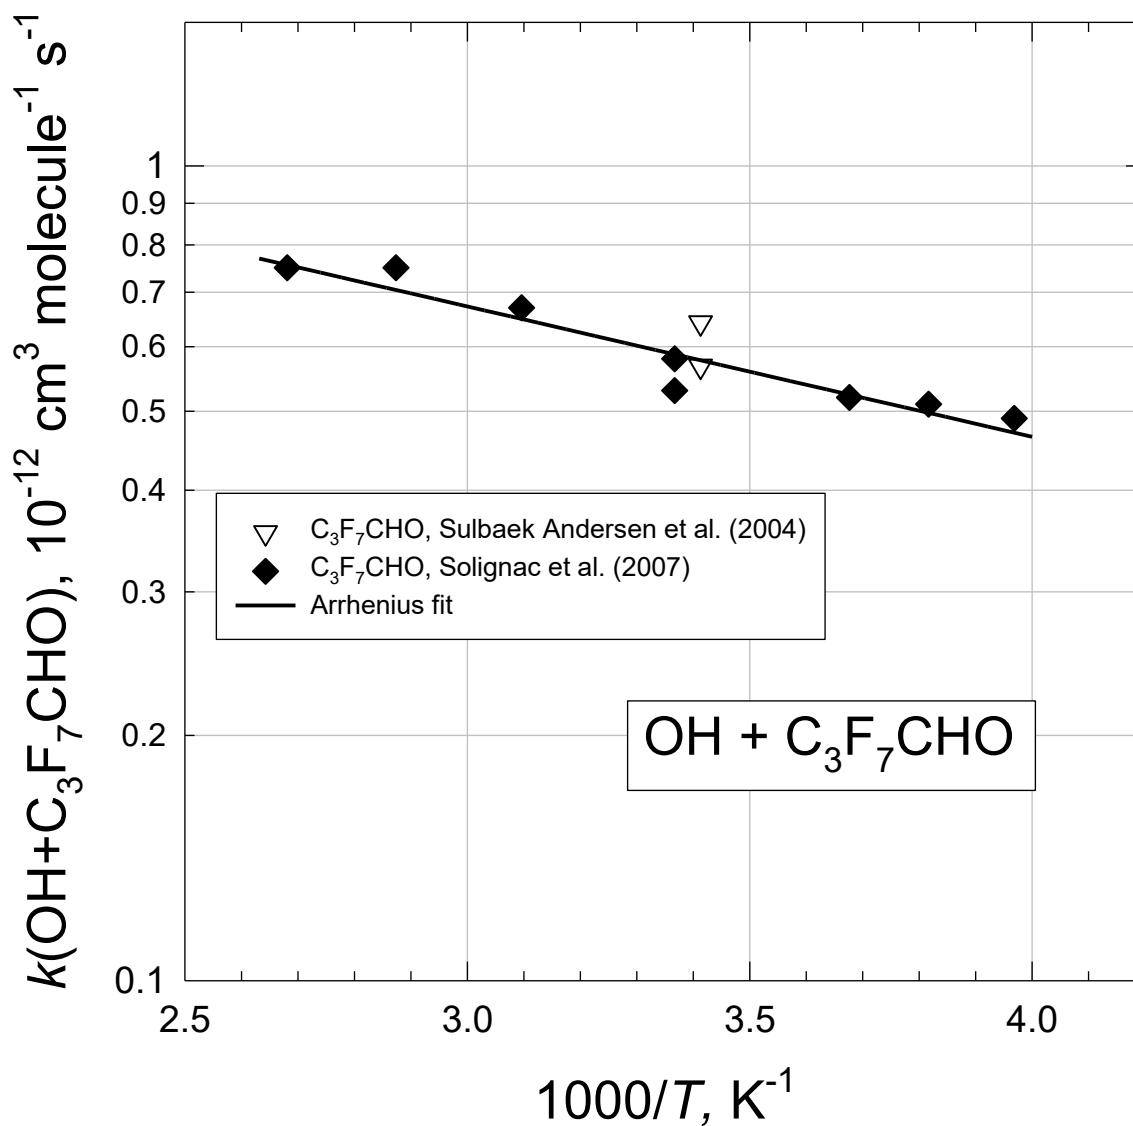

4180  
4181

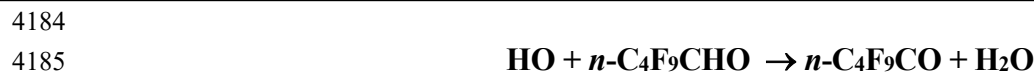

4186  
 4187 **Rate coefficient data**  
 4188

| <i>k</i> /cm <sup>3</sup> molecule <sup>-1</sup> s <sup>-1</sup>                               | <i>T</i> /K      | Reference                      | Technique/<br>Comments |
|------------------------------------------------------------------------------------------------|------------------|--------------------------------|------------------------|
| <i>Absolute Rate Coefficients</i>                                                              |                  |                                |                        |
| (2.0 ± 0.5) × 10 <sup>-12</sup> exp[-(356 ± 70)/ <i>T</i> ]<br>(6.4 ± 0.3) × 10 <sup>-13</sup> | 253 – 373<br>299 | Solignac et al. (2007)         | PLP-LIF (a)            |
| <i>Relative Rate Coefficients</i>                                                              |                  |                                |                        |
| (5.68 ± 0.74) × 10 <sup>-13</sup><br>(6.42 ± 0.75) × 10 <sup>-13</sup>                         | 296              | Sulbaek Andersen et al. (2004) | RR (b)                 |

4189  
 4190 **Comments**

- 4191  
 4192 (a) HO radicals were generated by the photolysis of H<sub>2</sub>O<sub>2</sub> at 248 nm in the presence of C<sub>4</sub>F<sub>9</sub>CHO in 100  
 4193 Torr (133 mbar) of helium diluent.  
 4194 (b) HO radicals were generated by the photolysis of CH<sub>3</sub>ONO in 700 Torr (933 mbar) of air in the  
 4195 presence of NO. In separate experiments C<sub>2</sub>H<sub>2</sub> and C<sub>2</sub>H<sub>4</sub> were used as reference compounds. The  
 4196 loss of C<sub>4</sub>F<sub>9</sub>CHO and the reference compounds were monitored using FTIR spectroscopy.  
 4197 Experiments were performed using CF<sub>3</sub>CHO, C<sub>3</sub>F<sub>7</sub>CHO, and C<sub>4</sub>F<sub>9</sub>CHO. There was no discernable  
 4198 difference in reactivity of the three fluorinated aldehydes. An analysis of the combined data set gave  
 4199 rate coefficient ratios of  $k(\text{HO} + \text{C}_x\text{F}_{2x+1}\text{CHO})/k(\text{HO} + \text{C}_2\text{H}_2) = 0.73 \pm 0.10$  and  
 4200  $k(\text{HO} + \text{C}_x\text{F}_{2x+1}\text{CHO})/k(\text{HO} + \text{C}_2\text{H}_4) = 0.0813 \pm 0.0095$ . Scaling these ratios using  $k(\text{HO} + \text{C}_2\text{H}_2) = 7.8$   
 4201  $\times 10^{-13}$  and  $k(\text{HO} + \text{C}_2\text{H}_4) = 7.9 \times 10^{-12}$  (Atkinson et al., 2006) gives  $k(\text{HO} + \text{C}_x\text{F}_{2x+1}\text{CHO}) = (5.68 \pm$   
 4202  $0.74) \times 10^{-13}$  cm<sup>3</sup> molecule<sup>-1</sup> s<sup>-1</sup> and  $(6.42 \pm 0.75) \times 10^{-13}$  cm<sup>3</sup> molecule<sup>-1</sup> s<sup>-1</sup>.

4203  
 4204 **Preferred Values**  
 4205

| Parameter                                                        | Value                                        | <i>T</i> /K |
|------------------------------------------------------------------|----------------------------------------------|-------------|
| <i>k</i> /cm <sup>3</sup> molecule <sup>-1</sup> s <sup>-1</sup> | 6.1 × 10 <sup>-13</sup>                      | 298         |
| <i>k</i> /cm <sup>3</sup> molecule <sup>-1</sup> s <sup>-1</sup> | 2.0 × 10 <sup>-12</sup> exp(-356/ <i>T</i> ) | 250-380     |
| <i>Reliability</i>                                               |                                              |             |
| Δ log <i>k</i>                                                   | 0.08                                         | 298         |
| Δ E/R                                                            | ± 150                                        | 250-380     |

4206  
 4207 **Comments on Preferred Values**

4208  
 4209  
 4210 There is excellent agreement between the absolute rate data reported by Solignac et al. (2007)  
 4211 and the relative rate data reported by Sulbaek Andersen et al. (2004) at temperatures near 298 K. The  
 4212 Arrhenius expression  $k(\text{HO} + \text{C}_4\text{F}_9\text{CHO}) = 2.0 \times 10^{-12} \exp(-365/T)$  from Solignac et al. (2007) is  
 4213 preferred and gives 6.1 × 10<sup>-13</sup> cm<sup>3</sup> molecule<sup>-1</sup> s<sup>-1</sup> at 298 K. As shown by Sulbaek Andersen et al.  
 4214 (2004), the reaction proceeds via abstraction of the aldehydic hydrogen to give C<sub>4</sub>F<sub>9</sub>C(O) radicals.  
 4215  
 4216  
 4217

4218  
4219  
4220  
4221  
4222  
4223  
4224  
4225  
4226  
4227  
4228

## References

- Atkinson, R., Baulch, D. L., Cox, R. A., Crowley, J. N., Hampson, R. F., Hynes, R. G., Jenkin, M. E., Rossi, M. J., and Troe, J.: Atmos. Chem. Phys., 6, 3625, 2006; IUPAC Subcommittee for Gas Kinetic Data Evaluation, <https://iupac.aeris-data.fr/>.
- Solignac, G., Mellouki, A., Le Bras, G., Mu, Y., and Sidebottom, H.: Phys. Chem. Chem. Phys., 9, 4200, 2007.
- Sulbaek Andersen, M. P., Nielsen, O. J., Hurley, M. D., Ball, J. C., Wallington, T. J., Stevens, J. E., Martin, J. W., Ellis, D. A., and Mabury, S. A.: J. Phys. Chem. A, 108, 5189, 2004.

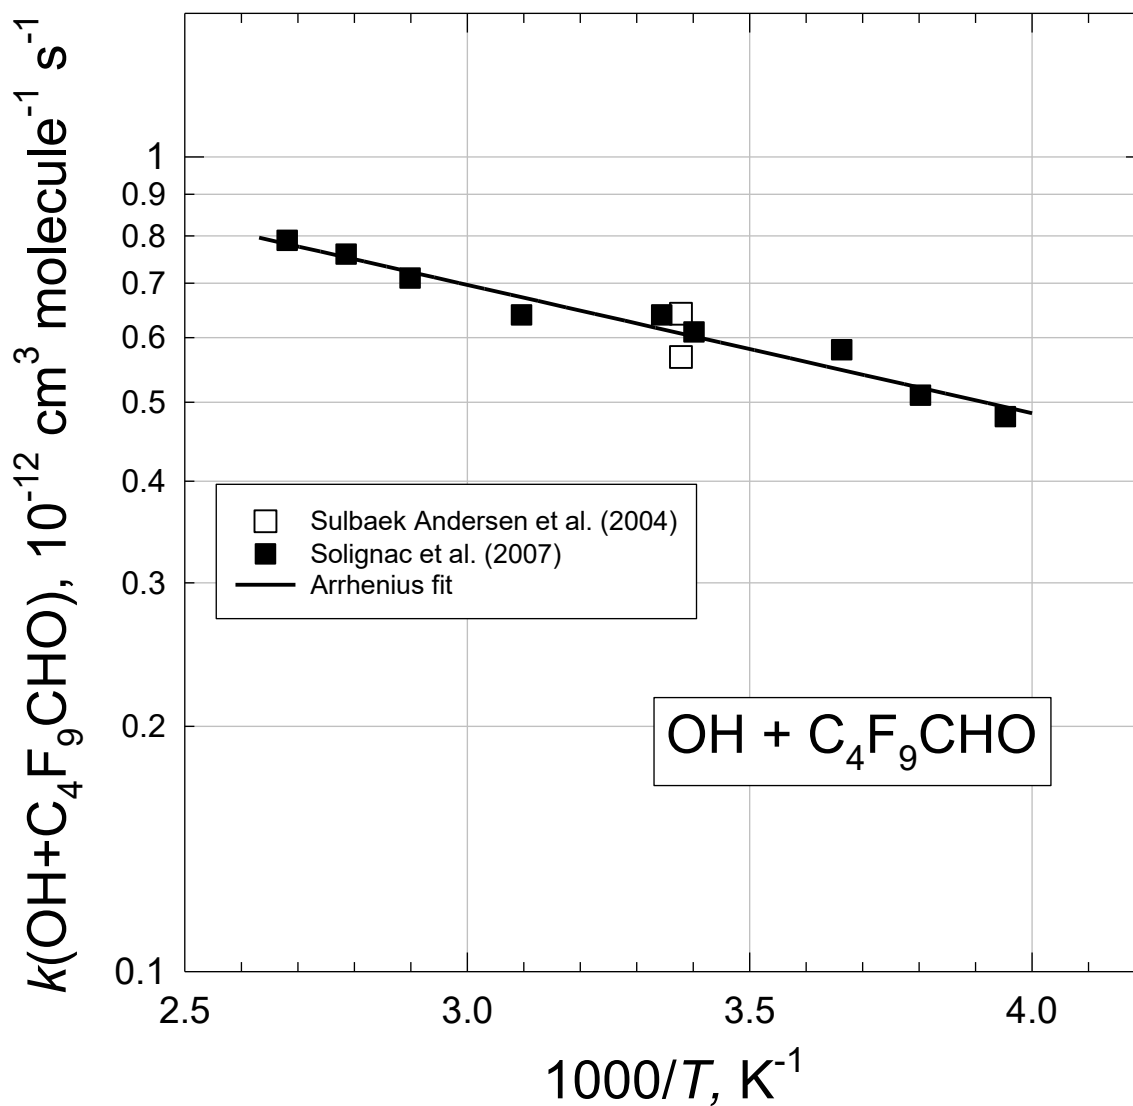

4229  
4230

4233  
 4234  
 4235  
 4236  
 4237  
 4238

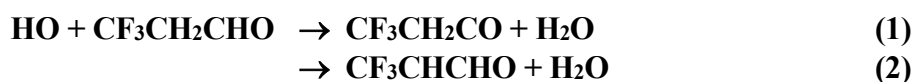

Rate coefficient data ( $k = k_1 + k_2$ )

| $k/\text{cm}^3 \text{ molecule}^{-1} \text{ s}^{-1}$ | $T/\text{K}$ | Reference              | Technique/<br>Comments |
|------------------------------------------------------|--------------|------------------------|------------------------|
| <i>Absolute Rate Coefficients</i>                    |              |                        |                        |
| $(2.96 \pm 0.04) \times 10^{-12}$                    | 298          | Kelly et al. (2005)    | PLP-LIF (a)            |
| $(7.8 \pm 2.2) \times 10^{-12} \exp(-314 \pm 90)/T$  | 263-358      | Antiñolo et al. (2010) | PLP-LIF (b)            |
| $(2.59 \pm 0.50) \times 10^{-12}$                    | 298          |                        |                        |
| <i>Relative Rate Coefficients</i>                    |              |                        |                        |
| $(3.87 \pm 0.16) \times 10^{-12}$                    | 298          | Sellevåg et al. (2004) | RR (c)                 |
| $(3.07 \pm 0.08) \times 10^{-12}$                    |              |                        |                        |
| $(2.48 \pm 0.27) \times 10^{-12}$                    | 296          | Hurley et al. (2005)   | RR (d)                 |
| $(2.65 \pm 0.36) \times 10^{-12}$                    |              |                        |                        |

4239  
 4240  
 4241  
 4242  
 4243  
 4244  
 4245  
 4246  
 4247  
 4248  
 4249  
 4250  
 4251  
 4252  
 4253  
 4254  
 4255  
 4256  
 4257  
 4258  
 4259  
 4260  
 4261

Comments

- (a) HO radicals were generated by the 248 nm photolysis of H<sub>2</sub>O<sub>2</sub> in 100 Torr (133 mbar) of helium diluent at 298 K.
- (b) HO radicals were generated by the 248 nm photolysis of H<sub>2</sub>O<sub>2</sub> in 50-215 Torr (67-286 mbar) of helium diluent at 263-358 K.
- (c) Experiments were performed in 1013 mbar of air diluent. HO radicals were generated by the photolysis of O<sub>3</sub> at  $\lambda \approx 310$  nm in the presence of H<sub>2</sub>O vapor. The loss of CF<sub>3</sub>CH<sub>2</sub>CHO was monitored relative to C<sub>2</sub>H<sub>5</sub>OH and HC(O)OC<sub>2</sub>H<sub>5</sub> in separate experiments using FTIR spectroscopy and rate coefficient ratios of  $k(\text{HO}+\text{CF}_3\text{CH}_2\text{CHO})/k(\text{HO}+\text{C}_2\text{H}_5\text{OH}) = 1.21 \pm 0.05$  and  $k(\text{HO}+\text{CF}_3\text{CH}_2\text{CHO})/k(\text{HO}+\text{HC}(\text{O})\text{OC}_2\text{H}_5) = 3.51 \pm 0.09$  were reported. Scaling these ratios using  $k(\text{HO}+\text{C}_2\text{H}_5\text{OH}) = 3.2 \times 10^{-12}$  (Atkinson et al., 2006) and  $k(\text{HO}+\text{HC}(\text{O})\text{OC}_2\text{H}_5) = 8.74 \times 10^{-13}$  (Calvert et al., 2011) gives  $k(\text{HO}+\text{CF}_3\text{CH}_2\text{CHO}) = (3.87 \pm 0.16) \times 10^{-12} \text{ cm}^3 \text{ molecule}^{-1} \text{ s}^{-1}$  and  $(3.07 \pm 0.08) \times 10^{-12} \text{ cm}^3 \text{ molecule}^{-1} \text{ s}^{-1}$ .
- (d) HO radicals were generated by the photolysis of CH<sub>3</sub>ONO in 700 Torr (933 mbar) of air in the presence of NO. C<sub>2</sub>H<sub>2</sub> and C<sub>2</sub>H<sub>4</sub> were used as reference compounds in separate experiments. The loss of CF<sub>3</sub>CH<sub>2</sub>CHO and the reference compounds were monitored using FTIR spectroscopy. Rate coefficient ratios of  $k(\text{HO}+\text{CF}_3\text{CH}_2\text{CHO})/k(\text{HO}+\text{C}_2\text{H}_2) = 3.18 \pm 0.35$  and  $k(\text{HO}+\text{CF}_3\text{CH}_2\text{CHO})/k(\text{HO}+\text{C}_2\text{H}_4) = 0.336 \pm 0.045$ . Scaling these ratios using  $k(\text{HO}+\text{C}_2\text{H}_2) = 7.8 \times 10^{-13}$  and  $k(\text{HO}+\text{C}_2\text{H}_4) = 7.9 \times 10^{-12}$  (Atkinson et al., 2006) gives  $k(\text{HO}+\text{CF}_3\text{CH}_2\text{CHO}) = (2.48 \pm 0.27) \times 10^{-12} \text{ cm}^3 \text{ molecule}^{-1} \text{ s}^{-1}$  and  $(2.65 \pm 0.36) \times 10^{-12} \text{ cm}^3 \text{ molecule}^{-1} \text{ s}^{-1}$ .

4262  
4263

## Preferred Values

| Parameter                                              | Value                               | T/K     |
|--------------------------------------------------------|-------------------------------------|---------|
| $k / \text{cm}^3 \text{ molecule}^{-1} \text{ s}^{-1}$ | $2.7 \times 10^{-12}$               | 298     |
| $k / \text{cm}^3 \text{ molecule}^{-1} \text{ s}^{-1}$ | $7.74 \times 10^{-12} \exp(-314/T)$ | 260-360 |
| <i>Reliability</i>                                     |                                     |         |
| $\Delta \log k$                                        | 0.15                                | 298     |
| $\Delta (E/R)$                                         | $\pm 150$                           | 260-360 |

4264  
42654266  
4267  
4268*Comments on Preferred Values*4269  
4270  
4271  
4272  
4273  
4274  
4275  
4276

Except for one of the two relative rate determinations by Sellevåg et al. (2004), the data from the relative and absolute rate studies by Antiñolo et al. (2010), Hurley et al. (2005), Kelly et al. (2005), and Sellevåg et al. (2004) are consistent within the combined experimental uncertainties. Taking an average of the data from Antiñolo et al. (2010), Hurley et al. (2005), and Kelly et al. (2005) gives the preferred value at 298 K. The preferred Arrhenius expression is derived from taking the temperature dependence from Antiñolo et al. (2010) and adjusting the pre-exponential factor to match the preferred value at 298 K. The reaction is expected to proceed predominantly via abstraction of the aldehydic hydrogen giving  $\text{CF}_3\text{CH}_2\text{C}(\text{O})$  radicals.

4277  
4278  
4279

## References

4280  
4281  
4282  
4283  
4284  
4285  
4286  
4287  
4288  
4289  
4290  
4291  
4292  
4293

- Antiñolo, M., Jiménez, E., Notario, A., Martínez, E., and Aldaladejo, J.: Atmos. Chem. Phys., 10, 1911, 2010.
- Atkinson, R., Baulch, D. L., Cox, R. A., Crowley, J. N., Hampson, R. F., Hynes, R. G., Jenkin, M. E., Rossi, M. J., and Troe, J.: Atmos. Chem. Phys., 6, 3625, 2006; IUPAC Subcommittee for Gas Kinetic Data Evaluation, <https://iupac.aeris-data.fr/>.
- Calvert, J. G., Mellouki, A., Orlando, J. J., Pilling, M., and Wallington T. J.: The Mechanisms of Atmospheric Oxidation of the Oxygenates, Oxford University Press, New York, NY, 2011.
- Hurley, M. D., Misner, J. A., Ball, J. C., Wallington, T. J., Ellis, D. A., Martin, J. W., and Mabury, S. A.: J. Phys. Chem. A, 109, 9816, 2005.
- Kelly, T., Bossoutrot, V., Magneron, I., Wirtz, K., Treacy, J., Mellouki, A., Sidebottom, H., and Le Bras, G.: J. Phys. Chem. A, 109, 347, 2005.
- Sellevåg, S. R., Kelly, T., Sidebottom, H., and Nielsen, C. J.: Phys. Chem. Chem. Phys., 6, 1243, 2004.

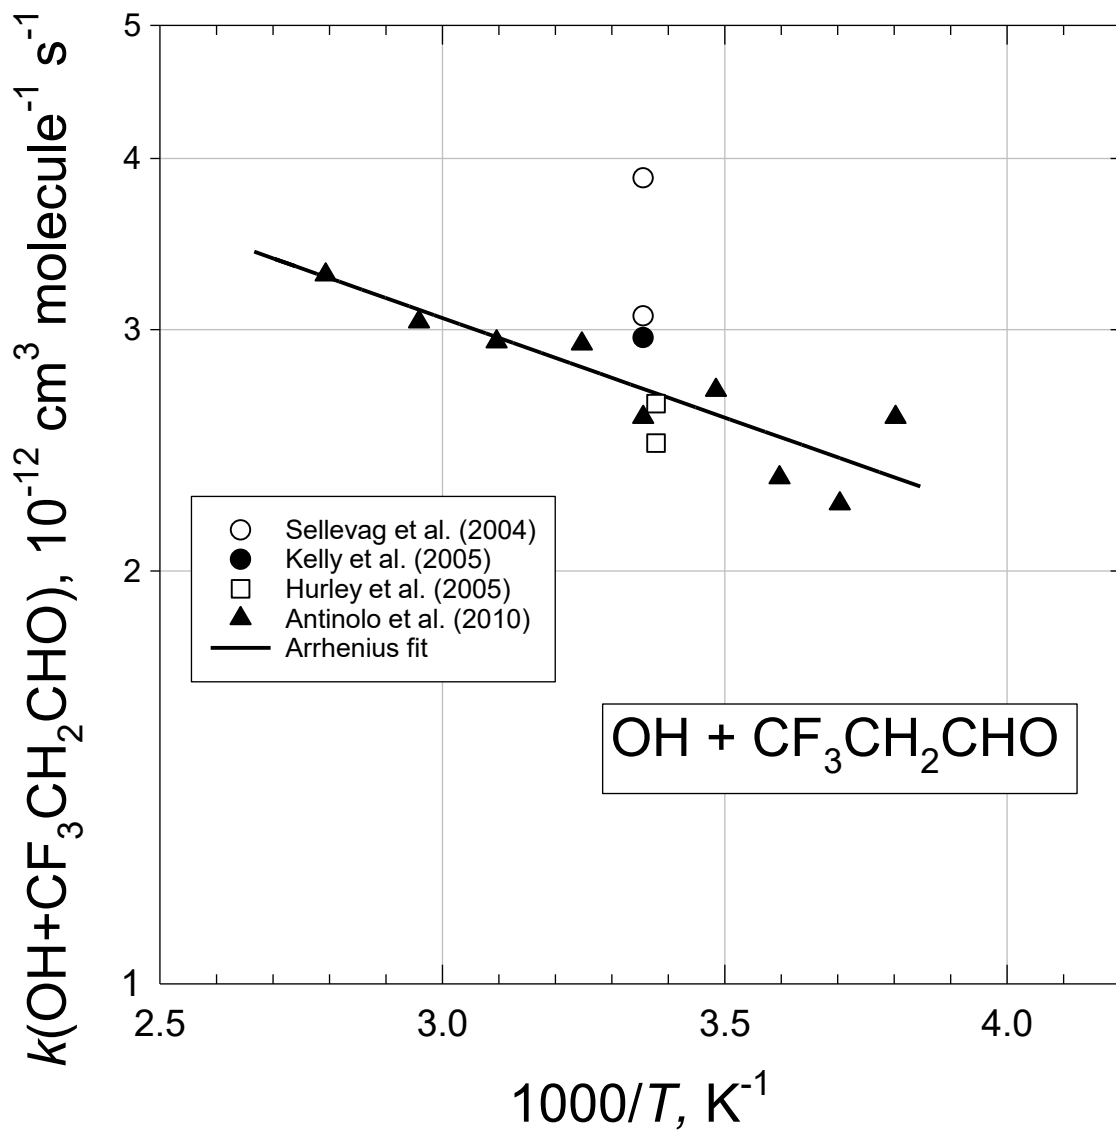

4294  
4295  
4296  
4297  
4298

4299 **oFOx102: HO + n-C<sub>6</sub>F<sub>13</sub>CH<sub>2</sub>CHO**  
4300 Last evaluated: June 2025; Last change in preferred values: June 2009.

4301

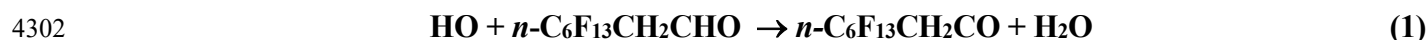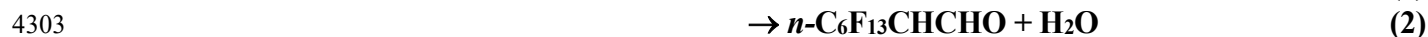

4304

4305 **Rate coefficient data ( $k = k_1 + k_2$ )**

4306

| $k/\text{cm}^3 \text{ molecule}^{-1} \text{ s}^{-1}$ | $T/\text{K}$ | Reference               | Technique/ Comments |
|------------------------------------------------------|--------------|-------------------------|---------------------|
| <i>Relative Rate Coefficients</i>                    |              |                         |                     |
| $(1.98 \pm 0.24) \times 10^{-12}$                    | 296          | Chiappero et al. (2010) | RR (a)              |

4307

4308

4309

### Comments

4310 (a) HO radicals were generated by the photolysis of CH<sub>3</sub>ONO in n-C<sub>6</sub>F<sub>13</sub>CH<sub>2</sub>CHO/C<sub>2</sub>H<sub>4</sub>/CH<sub>3</sub>ONO  
4311 mixtures in 700 Torr (933 mbar) of air diluent. The loss of C<sub>6</sub>F<sub>13</sub>CH<sub>2</sub>CHO and C<sub>2</sub>H<sub>4</sub> were monitored  
4312 using FTIR spectroscopy and a rate coefficient ratio of  $k(\text{HO}+\text{C}_6\text{F}_{13}\text{CH}_2\text{CHO})/k(\text{HO}+\text{C}_2\text{H}_4) = 0.25$   
4313  $\pm 0.03$  was obtained. Using  $k(\text{HO}+\text{C}_2\text{H}_4) = 7.9 \times 10^{-12} \text{ cm}^3 \text{ molecule}^{-1} \text{ s}^{-1}$  (Atkinson et al., 2006)  
4314 gives  $k(\text{HO}+\text{C}_6\text{F}_{13}\text{CH}_2\text{CHO}) = (1.98 \pm 0.24) \times 10^{-12} \text{ cm}^3 \text{ molecule}^{-1} \text{ s}^{-1}$ .

4315

4316

4317

### Preferred Values

| Parameter                                            | Value                 | $T/\text{K}$ |
|------------------------------------------------------|-----------------------|--------------|
| $k/\text{cm}^3 \text{ molecule}^{-1} \text{ s}^{-1}$ | $2.0 \times 10^{-12}$ | 298          |
| <i>Reliability</i>                                   |                       |              |
| $\Delta \log k$                                      | 0.15                  | 298          |

4318

4319

4320

4321 *Comments on Preferred Values*

4322

4323 The preferred value is based on the sole study of this reaction by Chiappero et al. (2010). The  
4324 reaction is expected to proceed predominantly via abstraction of the aldehydic hydrogen giving  
4325 C<sub>6</sub>F<sub>13</sub>CH<sub>2</sub>C(O) radicals.

4326

4327

4328

### References

4329 Atkinson, R., Baulch, D. L., Cox, R. A., Crowley, J. N., Hampson, R. F., Hynes, R. G., Jenkin, M. E.,  
4330 Rossi, M. J., and Troe, J.: Atmos. Chem. Phys., 6, 3625, 2006; IUPAC Subcommittee for Gas Kinetic  
4331 Data Evaluation, <https://iupac.aeris-data.fr/>.

4332 Chiappero, M. S., Argüello, G. A., Hurley, M. D., and Wallington, T. J.: J. Phys. Chem. A, 114, 6131,  
4333 2010.

4334

4335 **oFOx103: HO + *n*-C<sub>8</sub>F<sub>17</sub>CH<sub>2</sub>CHO**  
 4336 Last evaluated: June 2025; Last change in preferred values: June 2009.

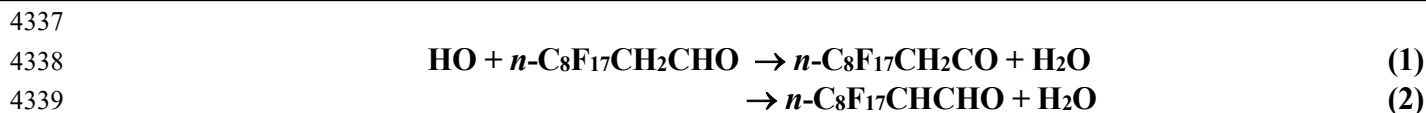

4340  
 4341 **Rate coefficient data ( $k = k_1 + k_2$ )**  
 4342

| $k/\text{cm}^3 \text{ molecule}^{-1} \text{ s}^{-1}$ | $T/\text{K}$ | Reference               | Technique/ Comments |
|------------------------------------------------------|--------------|-------------------------|---------------------|
| <i>Relative Rate Coefficients</i>                    |              |                         |                     |
| $(1.82 \pm 0.32) \times 10^{-12}$                    | 296          | Chiappero et al. (2008) | RR (a)              |

4343  
 4344 **Comments**

4345  
 4346 (a) HO radicals were generated by the photolysis of CH<sub>3</sub>ONO in *n*-C<sub>8</sub>F<sub>17</sub>CH<sub>2</sub>CHO/C<sub>2</sub>H<sub>4</sub>/CH<sub>3</sub>ONO  
 4347 mixtures in 700 Torr (933 mbar) of air diluent. The loss of C<sub>8</sub>F<sub>17</sub>CH<sub>2</sub>CHO and C<sub>2</sub>H<sub>4</sub> were  
 4348 monitored using FTIR spectroscopy and a rate coefficient ratio of  
 4349  $k(\text{HO} + \text{C}_8\text{F}_{17}\text{CH}_2\text{CHO})/k(\text{HO} + \text{C}_2\text{H}_4) = 0.23 \pm 0.04$  was obtained. Using  $k(\text{HO} + \text{C}_2\text{H}_4) = 7.9 \times 10^{-12}$   
 4350  $\text{cm}^3 \text{ molecule}^{-1} \text{ s}^{-1}$  (Atkinson et al., 2006) gives  $k(\text{HO} + \text{C}_8\text{F}_{17}\text{CH}_2\text{CHO}) = (1.82 \pm 0.32) \times 10^{-12} \text{ cm}^3$   
 4351  $\text{molecule}^{-1} \text{ s}^{-1}$ .

4352  
 4353 **Preferred Values**  
 4354

| Parameter                                            | Value                 | $T/\text{K}$ |
|------------------------------------------------------|-----------------------|--------------|
| $k/\text{cm}^3 \text{ molecule}^{-1} \text{ s}^{-1}$ | $1.8 \times 10^{-12}$ | 298          |
| <i>Reliability</i>                                   |                       |              |
| $\Delta \log k$                                      | 0.15                  | 298          |

4355  
 4356 *Comments on Preferred Values*

4357  
 4358 The preferred value is based on the sole study of this reaction by Chiappero et al. (2008). The  
 4359 reaction is expected to proceed predominantly via abstraction of the aldehydic hydrogen giving  
 4360 C<sub>8</sub>F<sub>17</sub>CH<sub>2</sub>C(O) radicals.  
 4361  
 4362

4363  
 4364 **References**

4365  
 4366 Atkinson, R., Baulch, D. L., Cox, R. A., Crowley, J. N., Hampson, R. F., Hynes, R. G., Jenkin, M. E.,  
 4367 Rossi, M. J., and Troe, J.: Atmos. Chem. Phys., 6, 3625, 2006; IUPAC Subcommittee for Gas Kinetic  
 4368 Data Evaluation, <https://iupac.aeris-data.fr/>.  
 4369 Chiappero, M. S., Argüello, G. A., Hurley, M. D., and Wallington, T. J.: Chem. Phys. Lett., 461, 198,  
 4370 2008.  
 4371  
 4372  
 4373  
 4374  
 4375  
 4376  
 4377

4378 **oFOx104: HO + C<sub>2</sub>F<sub>5</sub>C(O)CF(CF<sub>3</sub>)<sub>2</sub>**  
4379 Last evaluated: June 2025; Last change in preferred values: June 2009.

4380

4381 **HO + C<sub>2</sub>F<sub>5</sub>C(O)CF(CF<sub>3</sub>)<sub>2</sub> → products** (1)

4382

4383 **Rate coefficient data ( $k = k_1$ )**

4384

| $k/\text{cm}^3 \text{ molecule}^{-1} \text{ s}^{-1}$ | $T/\text{K}$ | Reference               | Technique/ Comments |
|------------------------------------------------------|--------------|-------------------------|---------------------|
| <i>Relative Rate Coefficients</i>                    |              |                         |                     |
| $< 5 \times 10^{-16}$                                | 296          | Taniguchi et al. (2003) | RR (a)              |

4385

4386

4387

### Comments

4388 (a) HO radicals were generated by photolysis of ozone at 254 nm in the presence of water vapor in 200  
4389 Torr (266 mbar) of helium diluent. The loss of C<sub>2</sub>F<sub>5</sub>C(O)CF(CF<sub>3</sub>)<sub>2</sub> was measured relative to CH<sub>4</sub>  
4390 and CH<sub>3</sub>Cl. Following the generation of OH radicals in the system, CH<sub>4</sub> and CH<sub>3</sub>Cl were observed  
4391 to decay, but there was no discernible loss (<2%) of C<sub>2</sub>F<sub>5</sub>C(O)CF(CF<sub>3</sub>)<sub>2</sub> (over and above that  
4392 ascribed to photolysis). Using  $k(\text{HO}+\text{CH}_4) = 6.4 \times 10^{-15} \text{ cm}^3 \text{ molecule}^{-1} \text{ s}^{-1}$  (Atkinson et al., 2006)  
4393 an upper limit of  $k(\text{HO}+\text{C}_2\text{F}_5\text{C}(\text{O})\text{CF}(\text{CF}_3)_2) < 5 \times 10^{-16} \text{ cm}^3 \text{ molecule}^{-1} \text{ s}^{-1}$  was derived.

4394

4395

4396

### Preferred Values

| Parameter                                            | Value                 | $T/\text{K}$ |
|------------------------------------------------------|-----------------------|--------------|
| $k/\text{cm}^3 \text{ molecule}^{-1} \text{ s}^{-1}$ | $< 5 \times 10^{-16}$ | 298          |

4397

4398 *Comments on Preferred Values*

4399

4400 The preferred value is based on the study by Taniguchi et al. (2008).

4401

4402

4403

### References

4404 Atkinson, R., Baulch, D. L., Cox, R. A., Crowley, J. N., Hampson, R. F., Hynes, R. G., Jenkin, M. E.,  
4405 Rossi, M. J., and Troe, J.: Atmos. Chem. Phys., 6, 3625, 2006; IUPAC Subcommittee for Gas Kinetic  
4406 Data Evaluation, <https://iupac.aeris-data.fr/>.

4407 Taniguchi, N., Wallington, T. J., Hurley, M. D., Guschin, A. G., Molina, L. T., and Molina, M. J.: J. Phys.  
4408 Chem. A., 107, 2674, 2003.

4409

4410

4411 **oClOx92: OH + CH<sub>2</sub>ClC(O)CH<sub>3</sub>**  
 4412 Last evaluated: June 2025; Last change in preferred values: June 2010

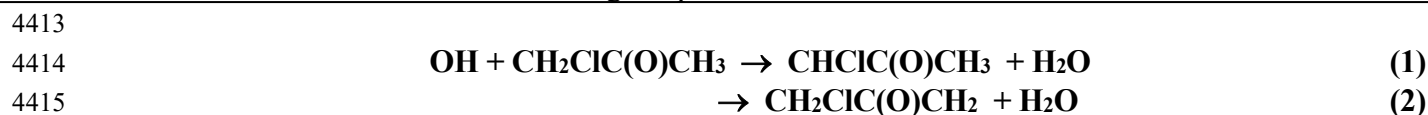

4417 **Rate coefficient data ( $k = k_1 + k_2$ )**  
 4418

| $k/\text{cm}^3 \text{ molecule}^{-1} \text{ s}^{-1}$ | $T/\text{K}$ | Reference          | Technique/<br>Comments |
|------------------------------------------------------|--------------|--------------------|------------------------|
| <i>Relative Rate Coefficients</i>                    |              |                    |                        |
| $(4.38 \pm 0.29) \times 10^{-13}$                    | 298          | Carr et al. (2003) | RR (a)                 |

4419  
 4420 **Comments**

4421  
 4422 (a) OH radicals were generated by the photolysis of O<sub>3</sub> at 254 nm in the presence of H<sub>2</sub>O vapour in 1  
 4423 bar of O<sub>2</sub> diluent. CH<sub>2</sub>ClCH<sub>2</sub>Cl was used as the reference compound. Chemical analysis was  
 4424 achieved using FTIR spectroscopy and GC techniques and a rate coefficient ratio of  
 4425  $k(\text{HO}+\text{CH}_2\text{ClC(O)CH}_3)/k(\text{HO}+\text{CH}_2\text{ClCH}_2\text{Cl}) = 1.81 \pm 0.12$  was obtained. Using  
 4426  $k(\text{HO}+\text{CH}_2\text{ClCH}_2\text{Cl}) = 2.42 \times 10^{-13} \text{ cm}^3 \text{ molecule}^{-1} \text{ s}^{-1}$  (Calvert et al., 2008) gives  
 4427  $k(\text{HO}+\text{CH}_2\text{ClC(O)CH}_3) = (4.38 \pm 0.29) \times 10^{-13} \text{ cm}^3 \text{ molecule}^{-1} \text{ s}^{-1}$ .  
 4428

4429 **Preferred Values**  
 4430

| Parameter                                            | Value                 | $T/\text{K}$ |
|------------------------------------------------------|-----------------------|--------------|
| $k/\text{cm}^3 \text{ molecule}^{-1} \text{ s}^{-1}$ | $4.4 \times 10^{-13}$ | 298          |
| <i>Reliability</i>                                   |                       |              |
| $\Delta \log k$                                      | 0.15                  | 298          |

4431  
 4432 *Comments on Preferred Values*

4433  
 4434 The preferred value is based on the study by Carr et al. (2003). The chlorine atom initiated  
 4435 oxidation of CH<sub>2</sub>ClC(O)CH<sub>3</sub> was studied by Carr et al. (2003) in one atmosphere of O<sub>2</sub> and the formation  
 4436 of CO, CO<sub>2</sub>, and HC(O)Cl products were reported. The products of the HO-initiated oxidation are  
 4437 expected to be the same. Carr et al (2003) did not provide any information on the magnitude of the  
 4438 consumption of CH<sub>2</sub>ClC(O)CH<sub>3</sub> and the precise mechanism by which these products form is not clear.  
 4439 As discussed by Calvert et al. (2011), photolysis leading to the formation of CO, CO<sub>2</sub>, and HC(O)Cl is  
 4440 probably the major atmospheric fate of CH<sub>2</sub>ClC(O)CH<sub>3</sub>.  
 4441  
 4442

4443  
 4444 **References**

4445  
 4446 Calvert, J. G., Derwent, R. G., Orlando, J. J., Tyndall, G. S., and Wallington T. J.: Mechanisms of  
 4447 Atmospheric Oxidation of the Alkanes, Oxford University Press, New York, NY, 2008.  
 4448 Calvert, J. G., Mellouki, A., Orlando, J. J., Pilling, M. J., and Wallington T. J.: The Mechanisms of  
 4449 Atmospheric Oxidation of the Oxygenates, Oxford University Press, New York, NY, 2011.  
 4450 Carr, S., Shallcross, D.E., Canosa-Mas, C.E., Wenger, J.C., Sidebottom, H.W., Treacy, J.J., and Wayne,  
 4451 R.P.: Phys. Chem. Chem. Phys., 5, 3874, 2003.  
 4452

4453 **oClOx93: HO + CHCl<sub>2</sub>C(O)CH<sub>3</sub>**  
4454 Last evaluated: June 2025; Last change in preferred values: June 2010.

4455  
4456  
4457  
4458  
4459  
4460

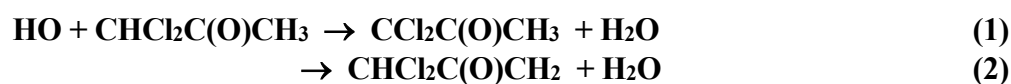

**Rate coefficient data ( $k = k_1 + k_2$ )**

| $k/\text{cm}^3 \text{ molecule}^{-1} \text{ s}^{-1}$ | $T/\text{K}$ | Reference          | Technique/ Comments |
|------------------------------------------------------|--------------|--------------------|---------------------|
| <i>Relative Rate Coefficients</i>                    |              |                    |                     |
| $(4.02 \pm 0.27) \times 10^{-13}$                    | 298          | Carr et al. (2003) | RR (a)              |

4461  
4462  
4463  
4464  
4465  
4466  
4467  
4468  
4469  
4470  
4471  
4472

**Comments**

(a) HO radicals were generated by the photolysis of O<sub>3</sub> at 254 nm in the presence of H<sub>2</sub>O vapour in 1 bar of O<sub>2</sub> diluent. CH<sub>2</sub>ClCH<sub>2</sub>Cl was used as the reference compound. Chemical analysis was achieved using FTIR spectroscopy and GC techniques and a rate coefficient ratio of  $k(\text{HO}+\text{CHCl}_2\text{C}(\text{O})\text{CH}_3)/k(\text{HO}+\text{CH}_2\text{ClCH}_2\text{Cl}) = 1.66 \pm 0.11$  was obtained. Using  $k(\text{HO}+\text{CH}_2\text{ClCH}_2\text{Cl}) = 2.42 \times 10^{-13} \text{ cm}^3 \text{ molecule}^{-1} \text{ s}^{-1}$  (Calvert et al., 2008) gives  $k(\text{HO}+\text{CHCl}_2\text{C}(\text{O})\text{CH}_3) = (4.02 \pm 0.27) \times 10^{-13} \text{ cm}^3 \text{ molecule}^{-1} \text{ s}^{-1}$ .

**Preferred Values**

| Parameter                                            | Value                 | $T/\text{K}$ |
|------------------------------------------------------|-----------------------|--------------|
| $k/\text{cm}^3 \text{ molecule}^{-1} \text{ s}^{-1}$ | $4.0 \times 10^{-13}$ | 298          |
| <i>Reliability</i>                                   |                       |              |
| $\Delta \log k$                                      | $\pm 0.15$            | 298          |

4473  
4474

*Comments on Preferred Values*

4475  
4476  
4477  
4478  
4479  
4480  
4481  
4482  
4483  
4484

The preferred value is based on the study by Carr et al. (2003). The chlorine-atom initiated oxidation of CHCl<sub>2</sub>C(O)CH<sub>3</sub> was studied by Carr et al. (2003) in one atmosphere of O<sub>2</sub> and the formation of CO, CO<sub>2</sub>, and COCl<sub>2</sub> products were reported. The products of the HO-initiated oxidation are expected to be the same. Carr et al (2003) did not provide any information on the magnitude of the consumption of CHCl<sub>2</sub>C(O)CH<sub>3</sub> and the precise mechanism by which these products form is not clear. As discussed by Calvert et al. (2011), photolysis leading to the formation of CO, CO<sub>2</sub>, and COCl<sub>2</sub> is probably the major atmospheric fate of CHCl<sub>2</sub>C(O)CH<sub>3</sub>.

4485  
4486  
4487

**References**

4488  
4489  
4490  
4491  
4492  
4493  
4494

- Calvert, J. G., Derwent, R. G., Orlando, J. J., Tyndall, G. S., and Wallington T. J.: Mechanisms of Atmospheric Oxidation of the Alkanes, Oxford University Press, New York, NY, 2008.
- Calvert, J. G., Mellouki, A., Orlando, J. J., Pilling, M. J., and Wallington T. J.: The Mechanisms of Atmospheric Oxidation of the Oxygenates, Oxford University Press, New York, NY, 2011.
- Carr, S., Shallcross, D.E., Canosa-Mas, C.E., Wenger, J.C., Sidebottom, H.W., Treacy, J.J., and Wayne, R.P.: Phys. Chem. Chem. Phys., 5, 3874, 2003.

4495 **oClOx94: OH + CCl<sub>3</sub>C(O)CH<sub>3</sub>**  
4496 Last evaluated: June 2025; Last change in preferred values: June 2010.

4497

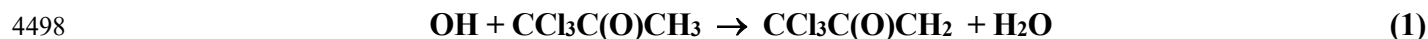

4499

4500 **Rate coefficient data ( $k = k_1$ )**

4501

| $k/\text{cm}^3 \text{ molecule}^{-1} \text{ s}^{-1}$ | $T/\text{K}$ | Reference          | Technique/ Comments |
|------------------------------------------------------|--------------|--------------------|---------------------|
| <i>Relative Rate Coefficients</i>                    |              |                    |                     |
| $(1.54 \pm 0.15) \times 10^{-14}$                    | 298          | Carr et al. (2003) | RR (a)              |

4502

4503

4504

### Comments

4505 (a) OH radicals were generated by the photolysis of O<sub>3</sub> at 254 nm in the presence of H<sub>2</sub>O vapour in 1  
4506 bar of O<sub>2</sub> diluent. CH<sub>3</sub>CN was used as the reference compound. Chemical analysis was achieved using  
4507 FTIR spectroscopy and GC techniques and a rate coefficient ratio of  
4508  $k(\text{HO}+\text{CCl}_3\text{C}(\text{O})\text{CH}_3)/k(\text{HO}+\text{CH}_3\text{CN}) = 0.70 \pm 0.07$  was obtained. Using  $k(\text{HO}+\text{CH}_3\text{CN}) = 2.2 \times 10^{-14}$   
4509  $\text{cm}^3 \text{ molecule}^{-1} \text{ s}^{-1}$  (Atkinson et al., 2006) gives  $k(\text{HO}+\text{CCl}_3\text{C}(\text{O})\text{CH}_3) = (1.54 \pm 0.15) \times 10^{-14} \text{ cm}^3$   
4510  $\text{molecule}^{-1} \text{ s}^{-1}$ .

4511

4512

4513

### Preferred Values

| Parameter                                            | Value                 | $T/\text{K}$ |
|------------------------------------------------------|-----------------------|--------------|
| $k/\text{cm}^3 \text{ molecule}^{-1} \text{ s}^{-1}$ | $1.5 \times 10^{-14}$ | 298          |
| <i>Reliability</i>                                   |                       |              |
| $\Delta \log k$                                      | $\pm 0.15$            | 298          |

4514

4515

### Comments on Preferred Values

4516

4517

4518

4519

4520

4521

4522

4523

4524

4525

4526

4527

4528

### References

- 4529 Atkinson, R., Baulch, D. L., Cox, R. A., Crowley, J. N., Hampson, R. F., Hynes, R. G., Jenkin, M. E.,  
4530 Rossi, M. J., and Troe, J.: Atmos. Chem. Phys., 6, 3625, 2006; IUPAC Task Group on Atmospheric  
4531 Chemical Kinetic Data Evaluation, <https://iupac.aeris-data.fr/>.  
4532 Calvert, J. G., Mellouki, A., Orlando, J. J., Pilling, M. J., and Wallington T. J.: The Mechanisms of  
4533 Atmospheric Oxidation of the Oxygenates, Oxford University Press, New York, NY, 2011.  
4534 Carr, S., Shallcross, D. E., Canosa-Mas, C. E., Wenger, J. C., Sidebottom, H.W., Treacy, J. J., and Wayne,  
4535 R. P.: Phys. Chem. Chem. Phys., 5, 3874, 2003.

4536

4537 **oFOx105: HO + C<sub>2</sub>F<sub>5</sub>C(O)OH**  
 4538 Last evaluated: June 2025; Last change in preferred values: June 2009.

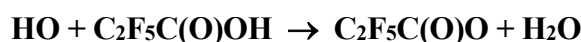

4540 **Rate coefficient data**

| <i>k</i> /cm <sup>3</sup> molecule <sup>-1</sup> s <sup>-1</sup> | <i>T</i> /K | Reference            | Technique/ Comments |
|------------------------------------------------------------------|-------------|----------------------|---------------------|
| <i>Relative Rate Coefficients</i>                                |             |                      |                     |
| $(1.54 \pm 0.17) \times 10^{-13}$                                | 296         | Hurley et al. (2004) | RR (a)              |
| $(1.56 \pm 0.11) \times 10^{-13}$                                |             |                      |                     |

4544 **Comments**

4545 (a) HO radicals were generated by the photolysis of CH<sub>3</sub>ONO in C<sub>2</sub>F<sub>5</sub>C(O)OH/CH<sub>3</sub>ONO/NO/(C<sub>2</sub>H<sub>2</sub>  
 4546 or C<sub>2</sub>H<sub>4</sub>) mixtures in 700 Torr (933 mbar) of air. The loss of the reference compounds (C<sub>2</sub>H<sub>2</sub> or C<sub>2</sub>H<sub>4</sub>)  
 4547 was monitored by FTIR spectroscopy. The loss of C<sub>2</sub>F<sub>5</sub>C(O)OH was small and difficult to observe  
 4548 directly. The loss of C<sub>2</sub>F<sub>5</sub>C(O)OH was calculated from the formation of COF<sub>2</sub> observed by FTIR  
 4549 spectroscopy with a molar yield assumed to be 193% (CF<sub>3</sub>ONO<sub>2</sub> and C<sub>2</sub>F<sub>5</sub>ONO<sub>2</sub> are formed in small  
 4550 amounts). Experiments performed using C<sub>2</sub>F<sub>5</sub>C(O)OH, C<sub>3</sub>F<sub>7</sub>C(O)OH, and C<sub>4</sub>F<sub>9</sub>C(O)OH gave  
 4551 indistinguishable values of the rate coefficient ratio  $k(\text{HO} + \text{C}_x\text{F}_{2x+1}\text{C}(\text{O})\text{OH})/k(\text{HO} + \text{reference})$ . Analysis  
 4552 of the composite data set gave  $k(\text{HO} + \text{C}_x\text{F}_{2x+1}\text{C}(\text{O})\text{OH})/k(\text{HO} + \text{C}_2\text{H}_2) = 0.197 \pm 0.022$  and  
 4553  $k(\text{HO} + \text{C}_x\text{F}_{2x+1}\text{C}(\text{O})\text{OH})/k(\text{HO} + \text{C}_2\text{H}_4) = 0.0198 \pm 0.0014$ . Using  $k(\text{HO} + \text{C}_2\text{H}_2) = 7.8 \times 10^{-13}$  and  
 4554  $k(\text{HO} + \text{C}_2\text{H}_4) = 7.9 \times 10^{-12}$  cm<sup>3</sup> molecule<sup>-1</sup> s<sup>-1</sup> (Atkinson et al., 2006) gives the values of  $k(\text{HO} +$   
 4555  $\text{C}_x\text{F}_{2x+1}\text{CHO})$  listed in the table above.

4556 **Preferred Values**

| Parameter                                                        | Value                   | <i>T</i> /K |
|------------------------------------------------------------------|-------------------------|-------------|
| <i>k</i> /cm <sup>3</sup> molecule <sup>-1</sup> s <sup>-1</sup> | $1.559 \times 10^{-13}$ | 298         |
| <i>Reliability</i>                                               |                         |             |
| $\Delta \log k$                                                  | 0.15                    | 298         |

4560 **Comments on Preferred Values**

4561 The preferred value is based on the study by Hurley et al. (2004). The C<sub>2</sub>F<sub>5</sub>C(O)O radical  
 4562 decomposes rapidly to give CO<sub>2</sub> and a C<sub>2</sub>F<sub>5</sub> radical. As discussed by Ellis et al. (2004), in the  
 4563 atmosphere the C<sub>2</sub>F<sub>5</sub> radical will be converted mainly into COF<sub>2</sub> with CF<sub>3</sub>C(O)OH formed as a minor  
 4564 product following reaction of C<sub>2</sub>F<sub>5</sub>O<sub>2</sub> radicals with CH<sub>3</sub>O<sub>2</sub> radicals. As might be expected from their  
 4565 similar molecular structure, the reactivity of C<sub>2</sub>F<sub>5</sub>C(O)OH, C<sub>3</sub>F<sub>7</sub>C(O)OH, and C<sub>4</sub>F<sub>9</sub>C(O)OH towards HO  
 4566 radicals are indistinguishable.

4567 **References**

- 4568 Atkinson, R., Baulch, D. L., Cox, R. A., Crowley, J. N., Hampson, R. F., Hynes, R. G., Jenkin, M. E.,  
 4569 Rossi, M. J., and Troe, J.: Atmos. Chem. Phys., 6, 3625, 2006; IUPAC Subcommittee for Gas Kinetic  
 4570 Data Evaluation, <https://iupac.aeris-data.fr/>.  
 4571 Ellis, D. A., Martin, J. W., De Silva, A. O., Mabury, S. A., Hurley, M. D., Sulbaek Andersen, M. P.,  
 4572 and Wallington, T. J.: Environ. Sci. Tech., 38, 3316, 2004.  
 4573 Hurley, M. D., Wallington, T. J., Ellis, D. A., Martin, J. W., and Mabury, S. A.: J. Phys. Chem. A, 108,  
 4574 615, 2004.

4581 **oFOx106: HO + *n*-C<sub>3</sub>F<sub>7</sub>C(O)OH**  
 4582 Last evaluated: June 2025; Last change in preferred values: June 2009.

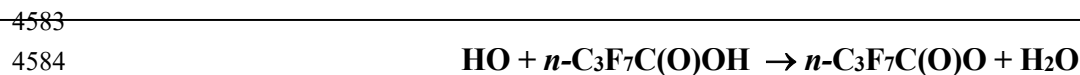

4585  
 4586 **Rate coefficient data**

4587

| <i>k</i> /cm <sup>3</sup> molecule <sup>-1</sup> s <sup>-1</sup> | <i>T</i> /K | Reference            | Technique/ Comments |
|------------------------------------------------------------------|-------------|----------------------|---------------------|
| <i>Relative Rate Coefficients</i>                                |             |                      |                     |
| $(1.54 \pm 0.17) \times 10^{-13}$                                | 296         | Hurley et al. (2004) | RR (a)              |
| $(1.56 \pm 0.11) \times 10^{-13}$                                |             |                      |                     |

4588  
 4589 **Comments**

4590  
 4591 (a) HO radicals were generated by the photolysis of CH<sub>3</sub>ONO in C<sub>3</sub>F<sub>7</sub>C(O)OH/CH<sub>3</sub>ONO/NO/(C<sub>2</sub>H<sub>2</sub>  
 4592 or C<sub>2</sub>H<sub>4</sub>) mixtures in 700 Torr (933 mbar) of air. The loss of the reference compounds C<sub>2</sub>H<sub>2</sub> or C<sub>2</sub>H<sub>4</sub> was  
 4593 monitored by FTIR spectroscopy. The loss of C<sub>3</sub>F<sub>7</sub>C(O)OH was small and difficult to observe directly.  
 4594 The loss of C<sub>3</sub>F<sub>7</sub>C(O)OH was calculated from the formation of COF<sub>2</sub> observed by FTIR spectroscopy  
 4595 with a molar yield assumed to be 290% (CF<sub>3</sub>ONO<sub>2</sub>, C<sub>2</sub>F<sub>5</sub>ONO<sub>2</sub>, and C<sub>3</sub>F<sub>7</sub>ONO<sub>2</sub> are formed in small  
 4596 amounts). Experiments performed using C<sub>2</sub>F<sub>5</sub>C(O)OH, C<sub>3</sub>F<sub>7</sub>C(O)OH, and C<sub>4</sub>F<sub>9</sub>C(O)OH gave  
 4597 indistinguishable values of the rate coefficient ratio  $k(\text{HO} + \text{C}_x\text{F}_{2x+1}\text{C}(\text{O})\text{OH})/k(\text{HO} + \text{reference})$ . Analysis  
 4598 of the composite data set gave  $k(\text{HO} + \text{C}_x\text{F}_{2x+1}\text{C}(\text{O})\text{OH})/k(\text{HO} + \text{C}_2\text{H}_2) = 0.197 \pm 0.022$  and  
 4599  $k(\text{HO} + \text{C}_x\text{F}_{2x+1}\text{C}(\text{O})\text{OH})/k(\text{HO} + \text{C}_2\text{H}_4) = 0.0198 \pm 0.0014$ . Using  $k(\text{HO} + \text{C}_2\text{H}_2) = 7.8 \times 10^{-13}$  and  
 4600  $k(\text{HO} + \text{C}_2\text{H}_4) = 7.9 \times 10^{-12}$  cm<sup>3</sup> molecule<sup>-1</sup> s<sup>-1</sup> (Atkinson et al., 2006) gives the values of  $k(\text{HO} +$   
 4601  $\text{C}_x\text{F}_{2x+1}\text{CHO})$  listed in the table above.

4602 **Preferred Values**

4603

| Parameter                                                        | Value                  | <i>T</i> /K |
|------------------------------------------------------------------|------------------------|-------------|
| <i>k</i> /cm <sup>3</sup> molecule <sup>-1</sup> s <sup>-1</sup> | $1.55 \times 10^{-13}$ | 298         |
| <i>Reliability</i>                                               |                        |             |
| $\Delta \log k$                                                  | 0.15                   | 298         |

4604  
 4605  
 4606 **Comments on Preferred Values**

4607  
 4608 The preferred value is based on the study by Hurley et al. (2004). The C<sub>3</sub>F<sub>7</sub>C(O)O radical  
 4609 decomposes rapidly to give CO<sub>2</sub> and a C<sub>3</sub>F<sub>7</sub> radical. As discussed by Ellis et al. (2004), the C<sub>3</sub>F<sub>7</sub> radical  
 4610 will be converted mainly into COF<sub>2</sub> with CF<sub>3</sub>C(O)OH and C<sub>2</sub>F<sub>5</sub>C(O)OH formed as minor products  
 4611 following reactions of C<sub>2</sub>F<sub>5</sub>O<sub>2</sub> and C<sub>3</sub>F<sub>7</sub>O<sub>2</sub> radicals with CH<sub>3</sub>O<sub>2</sub> radicals. As might be expected from  
 4612 their similar molecular structure, the reactivity of C<sub>2</sub>F<sub>5</sub>C(O)OH, C<sub>3</sub>F<sub>7</sub>C(O)OH, and C<sub>4</sub>F<sub>9</sub>C(O)OH towards  
 4613 HO radicals are indistinguishable.

4614  
 4615 **References**

4616  
 4617 Atkinson, R., Baulch, D. L., Cox, R. A., Crowley, J. N., Hampson, R. F., Hynes, R. G., Jenkin, M. E.,  
 4618 Rossi, M. J., and Troe, J.: Atmos. Chem. Phys., 6, 3625, 2006; IUPAC Subcommittee for Gas Kinetic  
 4619 Data Evaluation, <https://iupac.aeris-data.fr/>.  
 4620 Ellis, D. A., Martin, J. W., De Silva, A. O., Mabury, S. A., Hurley, M. D., Sulbaek Andersen, M. P.,  
 4621 and Wallington, T. J.: Environ. Sci. Tech., 38, 3316, 2004.  
 4622 Hurley, M. D., Wallington, T. J., Ellis, D. A., Martin, J. W., and Mabury, S. A.: J. Phys. Chem. A, 108,  
 4623 615, 2004.

4625 **oFOx107: HO + n-C<sub>4</sub>F<sub>9</sub>C(O)OH**  
4626 Last evaluated: June 2025; Last change in preferred values: June 2009.

4627  
4628  
4629  
4630  
4631

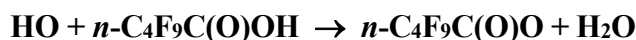

### Rate coefficient data

| $k/\text{cm}^3 \text{ molecule}^{-1} \text{ s}^{-1}$ | $T/\text{K}$ | Reference            | Technique/ Comments |
|------------------------------------------------------|--------------|----------------------|---------------------|
| <i>Relative Rate Coefficients</i>                    |              |                      |                     |
| $(1.54 \pm 0.17) \times 10^{-13}$                    | 296          | Hurley et al. (2004) | RR (a)              |
| $(1.56 \pm 0.11) \times 10^{-13}$                    |              |                      |                     |

4632  
4633  
4634

### Comments

4635 (a) HO radicals were generated by the photolysis of CH<sub>3</sub>ONO in C<sub>4</sub>F<sub>9</sub>C(O)OH/CH<sub>3</sub>ONO/NO/(C<sub>2</sub>H<sub>2</sub>  
4636 or C<sub>2</sub>H<sub>4</sub>) mixtures in 700 Torr (933 mbar) of air. The loss of the reference compounds C<sub>2</sub>H<sub>2</sub> or C<sub>2</sub>H<sub>4</sub> was  
4637 monitored by FTIR spectroscopy. The loss of C<sub>4</sub>F<sub>9</sub>C(O)OH was small and difficult to observe directly.  
4638 The loss of C<sub>4</sub>F<sub>9</sub>C(O)OH was calculated from the formation of COF<sub>2</sub> observed by FTIR spectroscopy.  
4639 with a molar yield assumed to be 384% (nitrates are formed in small amounts). Experiments performed  
4640 using C<sub>2</sub>F<sub>5</sub>C(O)OH, C<sub>3</sub>F<sub>7</sub>C(O)OH, and C<sub>4</sub>F<sub>9</sub>C(O)OH gave indistinguishable values of the rate coefficient  
4641 ratio  $k(\text{HO}+\text{C}_x\text{F}_{2x+1}\text{C(O)OH})/k(\text{HO}+\text{reference})$ . Analysis of the composite data set gave  
4642  $k(\text{HO}+\text{C}_x\text{F}_{2x+1}\text{C(O)OH})/k(\text{HO}+\text{C}_2\text{H}_2) = 0.197 \pm 0.022$  and  $k(\text{HO}+\text{C}_x\text{F}_{2x+1}\text{C(O)OH})/k(\text{HO}+\text{C}_2\text{H}_4) =$   
4643  $0.0198 \pm 0.0014$ . Using  $k(\text{HO}+\text{C}_2\text{H}_2) = 7.8 \times 10^{-13}$  and  $k(\text{HO}+\text{C}_2\text{H}_4) = 7.9 \times 10^{-12} \text{ cm}^3 \text{ molecule}^{-1} \text{ s}^{-1}$   
4644 (Atkinson et al., 2006) gives the values of  $k(\text{HO}+\text{C}_x\text{F}_{2x+1}\text{CHO})$  listed in the table above.

4645  
4646  
4647

### Preferred Values

| Parameter                                            | Value                  | $T/\text{K}$ |
|------------------------------------------------------|------------------------|--------------|
| $k/\text{cm}^3 \text{ molecule}^{-1} \text{ s}^{-1}$ | $1.55 \times 10^{-13}$ | 298          |
| <i>Reliability</i>                                   |                        |              |
| $\Delta \log k$                                      | 0.15                   | 298          |

4650  
4651

### Comments on Preferred Values

4652  
4653  
4654  
4655  
4656  
4657  
4658

The preferred value is based on the study by Hurley et al. (2004). The C<sub>4</sub>F<sub>9</sub>C(O)O radical decomposes rapidly to give CO<sub>2</sub> and a C<sub>4</sub>F<sub>9</sub> radical. As discussed by Ellis et al. (2005), the C<sub>4</sub>F<sub>9</sub> radical will be converted mainly into COF<sub>2</sub> with CF<sub>3</sub>C(O)OH, C<sub>2</sub>F<sub>5</sub>C(O)OH, and C<sub>3</sub>F<sub>7</sub>C(O)OH formed as minor products from reactions involving CH<sub>3</sub>O<sub>2</sub> radicals. As might be expected from their similar molecular structure, C<sub>4</sub>F<sub>9</sub>C(O)OH has a reactivity towards HO radicals which is indistinguishable from those of C<sub>2</sub>F<sub>5</sub>C(O)OH and C<sub>3</sub>F<sub>7</sub>C(O)OH.

4659  
4660

### References

4661 Atkinson, R., Baulch, D. L., Cox, R. A., Crowley, J. N., Hampson, R. F., Hynes, R. G., Jenkin, M. E.,  
4662 Rossi, M. J., and Troe, J.: Atmos. Chem. Phys., 6, 3625, 2006; IUPAC Subcommittee for Gas Kinetic  
4663 Data Evaluation, <https://iupac.aeris-data.fr/>.  
4664 Ellis, D. A., Martin, J. W., De Silva, A. O., Mabury, S. A., Hurley, M. D., Sulbaek Andersen, M. P.,  
4665 and Wallington, T. J.: Environ. Sci. Tech., 38, 3316, 2004.  
4666 Hurley, M. D., Wallington, T. J., Ellis, D. A., Martin, J. W., and Mabury, S. A.: J. Phys. Chem. A, 108,  
4667 615, 2004.

4668

4669 **oFOx137: HO + CH<sub>3</sub>OCHF<sub>2</sub>**  
 4670 Last evaluated: June 2025; Last change in preferred values: June 2019.

4671  
 4672  
 4673  
 4674  
 4675  
 4676

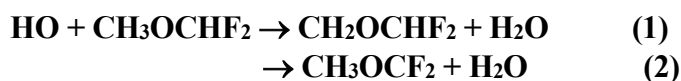

Rate coefficient data ( $k = k_1 + k_2$ )

| $k/\text{cm}^3 \text{ molecule}^{-1} \text{ s}^{-1}$      | Temp./K | Reference           | Technique/ Comments |
|-----------------------------------------------------------|---------|---------------------|---------------------|
| <i>Absolute Rate Coefficients</i>                         |         |                     |                     |
| $(1.16 \pm 0.42) \times 10^{-11} \exp[(-1728 \pm 133)/T]$ | 298-460 | Orkin et al. (2014) | DF-EPR (a)          |
| $(3.54 \pm 0.65) \times 10^{-14}$                         | 298     |                     |                     |

4677  
 4678  
 4679  
 4680  
 4681  
 4682  
 4683

### Comments

(a) HO radicals were generated by the reaction of H atoms with NO<sub>2</sub> in 2.5 Torr of helium diluent.

### Preferred Values

| Parameter                                            | Value                                | T/K     |
|------------------------------------------------------|--------------------------------------|---------|
| $k/\text{cm}^3 \text{ molecule}^{-1} \text{ s}^{-1}$ | $3.52 \times 10^{-14}$               | 298     |
|                                                      | $1.16 \times 10^{-11} \exp(-1728/T)$ | 290-470 |
| <i>Reliability</i>                                   |                                      |         |
| $\Delta \log k$                                      | 0.15                                 | 298     |
| $\Delta E/R$                                         | $\pm 100$                            | 290-470 |

4684  
 4685  
 4686  
 4687  
 4688  
 4689  
 4690  
 4691  
 4692

### Comments on Preferred Values

The preferred Arrhenius expression and rate coefficient at 298 K are taken from a fit to the data reported by Orkin et al. (2014).

### References

Orkin, V. L., Khamaganov, V. G., and Guschin, A. G.: J. Phys. Chem. A, 118, 10770, 2014.

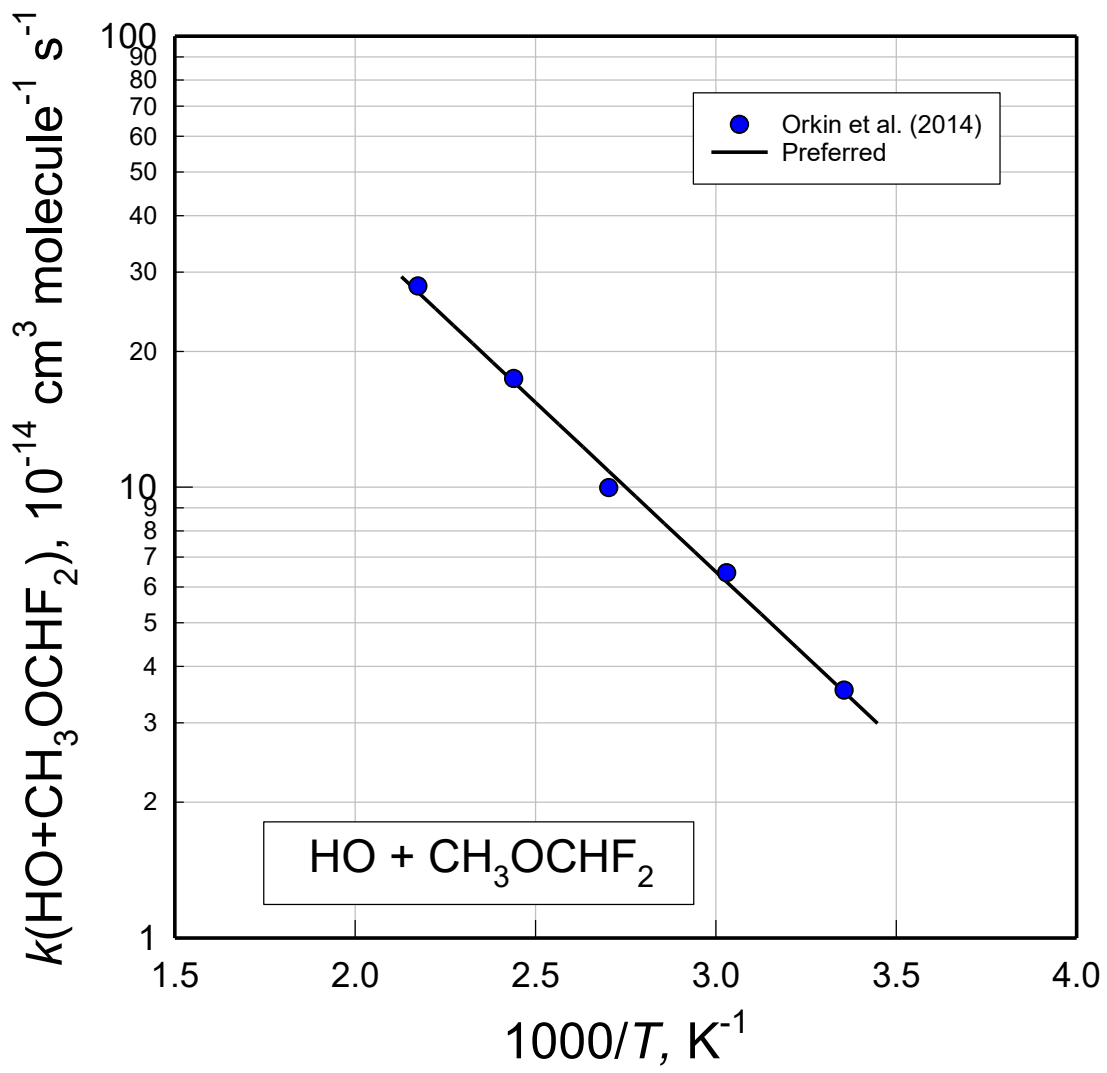

4693  
4694

4697  
 4698  
 4699  
 4700  
 4701

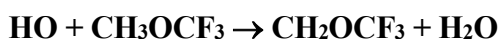

### Rate coefficient data

| $k/\text{cm}^3 \text{ molecule}^{-1} \text{ s}^{-1}$     | Temp./K | Reference             | Technique/ Comments |
|----------------------------------------------------------|---------|-----------------------|---------------------|
| <i>Absolute Rate Coefficients</i>                        |         |                       |                     |
| $(2.14 \pm 0.15) \times 10^{-14}$                        | 296     | Zhang et al. (1992)   | FP-RF (a)           |
| $(1.10 \pm 0.20) \times 10^{-12} \exp[(-1324 \pm 61)/T]$ | 298-460 | Orkin et al. (2014)   | DF-EPR (b)          |
| $(1.30 \pm 0.06) \times 10^{-14}$                        | 298     |                       |                     |
| <i>Relative Rate Coefficients</i>                        |         |                       |                     |
| $1.18 \times 10^{-12} \exp(-1381/T)$                     | 298-381 | Hsu and DeMore (1995) | RR (c)              |
| $1.15 \times 10^{-14}$                                   | 298     |                       |                     |
| $4.19 \times 10^{-12} \exp[(-1742)/T]$                   | 268-308 | Chen et al. (2001)    | RR (d)              |
| $1.17 \times 10^{-14}$                                   | 298     |                       |                     |

4702

### Comments

4703  
 4704

4705 (a) HO radicals were generated by the photolysis of water vapor in 35 Torr (47 mbar) of argon diluent  
 4706 and monitored by resonance fluorescence.

4707 (b) HO radicals were generated by the reaction of H atoms with NO<sub>2</sub> in 2.5 Torr of helium diluent.

4708 (c) HO radicals were generated by the UV photolysis of O<sub>3</sub> in the presence of water vapor. Experiments  
 4709 were conducted in which the loss of CF<sub>3</sub>OCH<sub>3</sub> was measured relative to either CH<sub>3</sub>CHF<sub>2</sub> or CHF<sub>2</sub>Cl.  
 4710 The concentrations of CF<sub>3</sub>OCH<sub>3</sub>, CH<sub>3</sub>CHF<sub>2</sub>, and CH<sub>2</sub>F<sub>2</sub> were measured by FTIR spectroscopy. The  
 4711 measured rate coefficient ratios of  $k(\text{HO} + \text{CF}_3\text{OCH}_3)/k(\text{HO} + \text{CH}_3\text{CHF}_2) = (0.65 \pm 0.08) \exp[(190 \pm$   
 4712  $43)/T]$  and  $k(\text{HO} + \text{CF}_3\text{OCH}_3)/k(\text{HO} + \text{CH}_2\text{F}_2) = (1.55 \pm 0.10) \exp[(136 \pm 43)/T]$  are placed on an  
 4713 absolute basis using  $k(\text{HO} + \text{CH}_3\text{CHF}_2) = 1.25 \times 10^{-12} \exp(-1070/T)$  and  $k(\text{HO} + \text{CH}_2\text{F}_2) = 2.3 \times 10^{-12}$   
 4714  $\exp(-1590/T)$  (Atkinson et al., 2008) to give  $k(\text{HO} + \text{CF}_3\text{OCH}_3) = (8.1 \pm 1.0) \times 10^{-13} \exp[(-880 \pm$   
 4715  $43)/T]$  and  $(3.6 \pm 1.0) \times 10^{-12} \exp[-(1454 \pm 43)/T] \text{ cm}^3 \text{ molecule}^{-1} \text{ s}^{-1}$ . A fit to the combined data set  
 4716 (scaled using reference rate coefficients from Atkinson et al. 2008) gives  $k(\text{HO} + \text{CF}_3\text{OCH}_3) = 1.18 \times$   
 4717  $10^{-12} \exp(-1381/T) \text{ cm}^3 \text{ molecule}^{-1} \text{ s}^{-1}$ .

4718 (d) HO radicals were generated by the photolysis of ozone in the presence of water vapor in 100 Torr of  
 4719 helium diluent. Separate experiments were performed in which the loss CF<sub>3</sub>OCH<sub>3</sub> was measured  
 4720 relative to either CH<sub>4</sub> or CH<sub>3</sub>CCl<sub>3</sub>. Placing the reported rate coefficient ratios on an absolute basis  
 4721 using  $k(\text{HO} + \text{CH}_4) = 1.85 \times 10^{-12} \exp(-1690/T)$  and  $k(\text{HO} + \text{CH}_3\text{CCl}_3) = 1.2 \times 10^{-12} \exp(-1440/T)$   
 4722 (Atkinson et al., 2008) and fitting an Arrhenius expression to the results gives  $k(\text{HO} + \text{CH}_3\text{OCF}_3) =$   
 4723  $(3.6 \pm 1.0) \times 10^{-12} \exp[(1454 \pm 43)/T] \text{ cm}^3 \text{ molecule}^{-1} \text{ s}^{-1}$ .

4724

4725

4726

### Preferred Values

| Parameter                                            | Value                                                          | T/K            |
|------------------------------------------------------|----------------------------------------------------------------|----------------|
| $k/\text{cm}^3 \text{ molecule}^{-1} \text{ s}^{-1}$ | $1.29 \times 10^{-14}$<br>$1.10 \times 10^{-12} \exp(-1324/T)$ | 298<br>290-470 |
| <i>Reliability</i>                                   |                                                                |                |
| $\Delta \log k$                                      | 0.10                                                           | 298            |

4727  
4728  
4729  
4730  
4731  
4732  
4733  
4734  
4735  
4736  
4737  
4738  
4739  
4740  
4741  
4742  
4743  
4744  
4745  
4746  
4747

### Comments on Preferred Values

There is excellent agreement in the results from the relative rate study by Hsu and DeMore (1995), the absolute study by Orkin et al. (2014), and the  $T > 285$  K results from the relative rate study by Chen et al. (2001). The rate coefficient reported by Zhang et al. (1992) at 296 K is substantially higher (by a factor of 1.6 to 1.9) than the results from Hsu and DeMore (1995), Chen et al. (2001), and Orkin et al. (2014). The origin of the discrepancy is probably the presence of reactive impurities in the sample used by Zhang et al. (1992). For reasons which are unclear, the low temperature ( $T < 285$  K) results from Chen et al. (2001) appear to be anomalously low. Further work is needed to investigate the kinetics of the reaction at temperatures below 285 K. The preferred Arrhenius expression and rate coefficient at 298 K are taken from Orkin et al. (2014).

### References

- Chen, L., Kutsuna, S., Nohara, K., Takeuchi, K., and Ibusuki, T.: J. Phys. Chem. A: 105, 10854, 2001.  
Hsu, K.-J. and DeMore, W. B.: J. Phys. Chem., 99, 11141, 1995.  
Orkin, V. L., Khamaganov, V. G., and Guschin, A. G.: J. Phys. Chem. A, 118, 10770, 2014.  
Zhang, Z., Saini, R. D., Kurylo, M. J., and Huie, R. E.: J. Phys. Chem., 96, 9301, 1992.

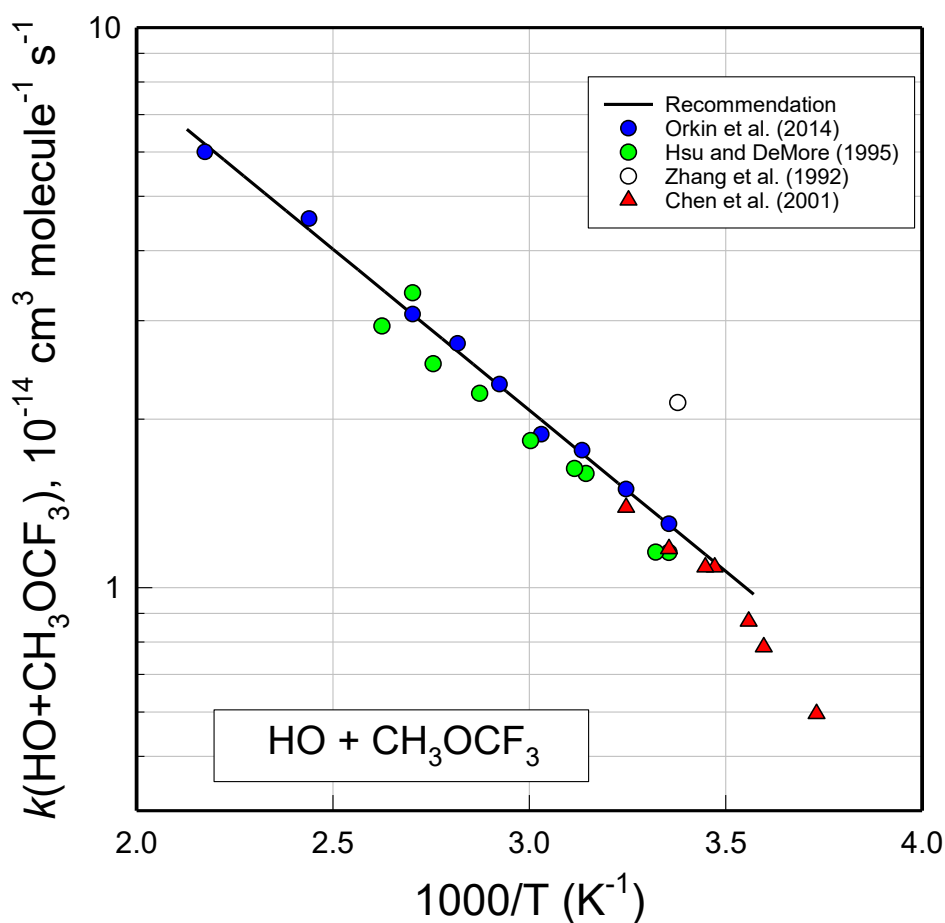

4748  
4749  
4750

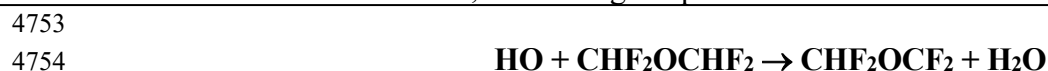

4755 **Rate coefficient data**

| $k/\text{cm}^3 \text{ molecule}^{-1} \text{ s}^{-1}$           | Temp./K | Reference             | Technique/ Comments |
|----------------------------------------------------------------|---------|-----------------------|---------------------|
| <i>Absolute Rate Coefficients</i>                              |         |                       |                     |
| $(2.53 \pm 0.24) \times 10^{-14}$                              | 296     | Zhang et al. (1992)   | FP-RF (a)           |
| $(2.41 \pm 0.16) \times 10^{-14}$                              | 296     |                       |                     |
| $(5.4 \pm 3.5) \times 10^{-13} \exp[-(1560 \pm 201)/T]$        | 269-312 | Garland et al. (1993) | PLP-LIF (b)         |
| $(3.0 \pm 0.7) \times 10^{-15}$                                | 295     |                       |                     |
| $(6.3^{+0.20}_{-0.16}) \times 10^{-12} \exp[-(1646 \pm 76)/T]$ | 277-370 | Orkin et al. (1999)   | FP-RF (c)           |
| $(2.47 \pm 0.12) \times 10^{-15}$                              | 298     |                       |                     |
| <i>Relative Rate Coefficients</i>                              |         |                       |                     |
| $1.26 \times 10^{-12} \exp[-(1896)/T]$                         | 298-381 | Hsu and DeMore (1995) | RR (d)              |
| $2.23 \times 10^{-15}$                                         | 298     |                       |                     |
| $1.01 \times 10^{-12} \exp[-(1825)/T]$                         | 268-308 | Wilson et al. (2001)  | RR (e)              |
| $2.18 \times 10^{-15}$                                         | 298     |                       |                     |

4758 **Comments**

- 4759  
 4760  
 4761 (a) HO radicals were generated by the photolysis of water vapor in 35 Torr (47 mbar) of argon and  
 4762 monitored by resonance fluorescence. Two sets of experiments were performed using different  
 4763 threshold voltages (3.3 kV or 4.6 kV) for the Xe flash lamp giving the values in the table.  
 4764 (b) HO radicals were generated by the 248 nm photolysis of HNO<sub>3</sub> water vapor in 20 Torr (27 mbar) of  
 4765 argon or helium diluent and monitored by LIF.  
 4766 (c) HO radicals were generated by the photolysis of water vapor in 100 Torr (133 mbar) of argon diluent.  
 4767 (d) HO radicals were generated by the UV photolysis of O<sub>3</sub> in the presence of water vapor. FTIR  
 4768 spectroscopy was used to follow the loss of CHF<sub>2</sub>OCHF<sub>2</sub> measured relative to CH<sub>3</sub>CCl<sub>3</sub>. The  
 4769 measured rate coefficient ratio of  $k(\text{HO} + \text{CHF}_2\text{OCHF}_2)/k(\text{HO} + \text{CH}_3\text{CCl}_3) = (1.05 \pm 0.20) \exp[(-456$   
 4770  $\pm 62)/T]$  is placed on an absolute basis using  $k(\text{HO} + \text{CH}_3\text{CCl}_3) = 1.2 \times 10^{-12} \exp(-1440/T)$  (Atkinson  
 4771 et al., 2008) to give  $k(\text{HO} + \text{CHF}_2\text{OCHF}_2) = 1.26 \times 10^{-12} \exp[-(1896)/T] \text{ cm}^3 \text{ molecule}^{-1} \text{ s}^{-1}$ .  
 4772 (e) HO radicals were generated by the photolysis of water vapor in helium diluent and the loss of  
 4773 CHF<sub>2</sub>OCHF<sub>2</sub> was measured relative to that of CF<sub>3</sub>CF<sub>2</sub>H by GC-MS. Placing the reported rate  
 4774 coefficient ratios on an absolute basis using  $k(\text{HO} + \text{CF}_3\text{CF}_2\text{H}) = 4.40 \times 10^{-13} \exp(-1630/T)$  (Atkinson  
 4775 et al., 2008) and fitting an Arrhenius expression to the results gives  $k(\text{HO} + \text{CHF}_2\text{OCHF}_2) = (3.6 \pm$   
 4776  $1.0) \times 10^{-12} \exp[(1454 \pm 43)/T] \text{ cm}^3 \text{ molecule}^{-1} \text{ s}^{-1}$ .

4777  
 4778  
 4779  
 4780  
 4781  
 4782  
 4783  
 4784  
 4785

4786  
4787

### Preferred Values

| Parameter                                              | Value                                                          | T/K            |
|--------------------------------------------------------|----------------------------------------------------------------|----------------|
| $k / \text{cm}^3 \text{ molecule}^{-1} \text{ s}^{-1}$ | $2.20 \times 10^{-15}$<br>$1.04 \times 10^{-12} \exp(-1836/T)$ | 298<br>270-470 |
| <i>Reliability</i>                                     |                                                                |                |
| $\Delta \log k$                                        | 0.10                                                           | 298            |
| $\Delta E/R$                                           | $\pm 100$                                                      | 270-470        |

4788  
4789  
4790

#### *Comments on Preferred Values*

4791 There is excellent agreement in the results at 298 K and higher temperatures from the relative  
4792 rate studies of Hsu and DeMore (1995) and Wilson et al. (2001) and the absolute rate study by Orkin  
4793 et al. (1999). The results at 298 K from the absolute rate study by Garland et al. (1993) lie  
4794 approximately 20-30% above those from Orkin et al. (1999) and the relative rate studies. The results  
4795 from the absolute study by Zhang et al. (1992) are approximately an order of magnitude greater than  
4796 from the other studies and probably reflect the presence of reactive impurities. The results from the  
4797 absolute studies by Orkin et al. (1999) and Garland et al. (1993) at temperatures below 298 K lie  
4798 substantially above those from the relative rate studies. This discrepancy may indicate the effect of  
4799 small amounts of reactive impurities in these studies whose effects would be more pronounced at the  
4800 lower temperatures. The preferred values are based on an Arrhenius fit to the data from Hsu and  
4801 DeMore (1995) and Wilson et al. (2001).

4802  
4803  
4804

#### References

4805 Garland, N. L., Medhurst, L. J. and Nelson, H. H.: J. Geophys. Res. 98, 23107, 1993.  
4806 Hsu, K.-J., and DeMore, W. B.: J. Phys. Chem., 99, 11141, 1995.  
4807 Orkin, V. L., Villenave, E., Huie, R. E., and Kurylo, M. J.: J. Phys. Chem. A, 103, 9770, 1999.  
4808 Wilson, E. W., Sawyer, A. A., and Sawyer, H. A.: J. Phys. Chem. A, 105, 1445, 2001.  
4809 Zhang, Z., Saini, R. D., Kurylo, M. J., and Huie, R. E.: J. Phys. Chem.: 96, 9301, 1992.  
4810  
4811

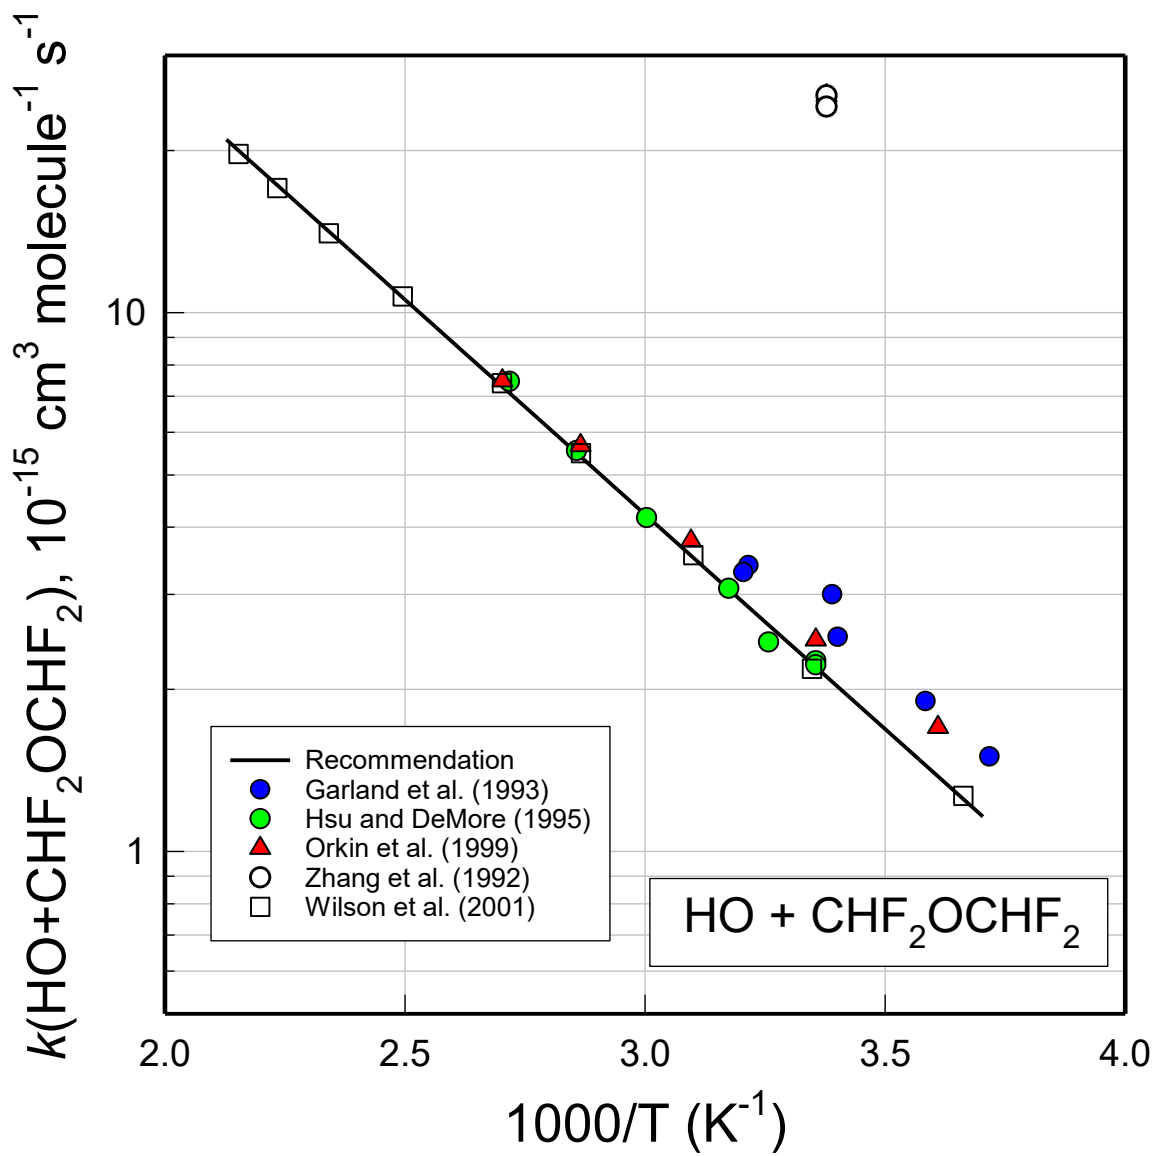

4812  
4813

4814 **oFOx140: HO + CHF<sub>2</sub>OCF<sub>3</sub>**  
 4815 Last evaluated: June 2025; Last change in preferred values: June 2019.

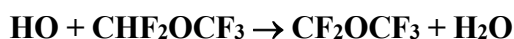

4817 **Rate coefficient data**

| <i>k</i> /cm <sup>3</sup> molecule <sup>-1</sup> s <sup>-1</sup> | Temp./K | Reference             | Technique/ Comments |
|------------------------------------------------------------------|---------|-----------------------|---------------------|
| <i>Absolute Rate Coefficients</i>                                |         |                       |                     |
| 3.47 × 10 <sup>-15</sup>                                         | 296     | Zhang et al. (1992)   | FP-RF (a)           |
| <i>Relative Rate Coefficients</i>                                |         |                       |                     |
| 3.09 × 10 <sup>-13</sup> exp[(-1942)/ <i>T</i> ]                 | 298-381 | Hsu and DeMore (1995) | RR (b)              |
| 4.57 × 10 <sup>-16</sup>                                         | 298     |                       |                     |

4821 **Comments**

- 4822 (a) HO radicals were generated by the photolysis of water vapor in 35 Torr (47 mbar) of argon diluent  
 4823 and monitored by resonance fluorescence.  
 4824 (b) HO radicals were generated by the UV photolysis of O<sub>3</sub> in the presence of water vapor. FTIR  
 4825 spectroscopy was used to follow the loss of CHF<sub>2</sub>OCF<sub>3</sub> and the reference compounds CF<sub>3</sub>H, CH<sub>4</sub>,  
 4826 and CHF<sub>2</sub>CF<sub>3</sub>. Placing the measured rate coefficient ratios on an absolute basis using *k*(HO + CF<sub>3</sub>H)  
 4827 = 6.90 × 10<sup>-13</sup> exp(-2340/*T*), *k*(HO + CH<sub>4</sub>) = 1.85 × 10<sup>-12</sup> exp(-1690/*T*), and *k*(HO + CHF<sub>2</sub>CF<sub>3</sub>H) =  
 4828 4.40 × 10<sup>-13</sup> exp(-1630/*T*) cm<sup>3</sup> molecule<sup>-1</sup> s<sup>-1</sup> (Atkinson et al., 2006, 2008) and fitting an Arrhenius  
 4829 expression to the results gives *k*(HO + CHF<sub>2</sub>OCF<sub>3</sub>) = 3.09 × 10<sup>-13</sup> exp[(-1942)/*T*] cm<sup>3</sup> molecule<sup>-1</sup> s<sup>-1</sup>.  
 4830  
 4831  
 4832

4833 **Preferred Values**

| Parameter                                                        | Value                                          | <i>T</i> /K |
|------------------------------------------------------------------|------------------------------------------------|-------------|
| <i>k</i> /cm <sup>3</sup> molecule <sup>-1</sup> s <sup>-1</sup> | 4.57 × 10 <sup>-16</sup>                       | 298         |
|                                                                  | 3.09 × 10 <sup>-13</sup> exp(-1942/ <i>T</i> ) | 290-400     |
| <i>Reliability</i>                                               |                                                |             |
| Δ log <i>k</i>                                                   | 0.10                                           | 298         |
| Δ E/R                                                            | ±100                                           | 290-400     |

4835 **Comments on Preferred Values**

4836 The preferred values are based on a fit to the results from the relative rate study of Hsu and  
 4837 DeMore (1995). The results from the absolute study by Zhang et al. (1992) at 296 K are  
 4838 approximately a factor of 8 greater than from Hsu and DeMore (1995) probably reflecting the  
 4839 presence of reactive impurities.  
 4840  
 4841

4842 **References**

4843 Atkinson, R., Baulch, D. L., Cox, R. A., Crowley, J. N., Hampson, R. F., Hynes, R. G., Jenkin, M. E.,  
 4844 Rossi, M. J., and Troe, J.: Atmos. Chem. Phys., 6, 3625, 2006; IUPAC Task Group on Atmospheric  
 4845 Chemical Kinetic Data Evaluation, <https://iupac.aeris-data.fr/>  
 4846  
 4847

4848 Atkinson, R., Baulch, D. L., Cox, R. A., Crowley, J. N., Hampson, R. F., Hynes, R. G., Jenkin, M. E.,  
4849 Rossi, M. J., Troe, J., and Wallington, T. J.: Atmos. Chem. Phys., 8, 4141, 2008; IUPAC  
4850 Subcommittee for Gas Kinetic Data Evaluation, <https://iupac.aeris-data.fr/>.  
4851 Hsu, K.-J. and DeMore, W. B.: J. Phys. Chem., 99, 11141, 1995.  
4852 Zhang, Z., Saini, R. D., Kurylo, M. J., and Huie, R. E.: J. Phys. Chem., 96, 9301, 1992.  
4853  
4854

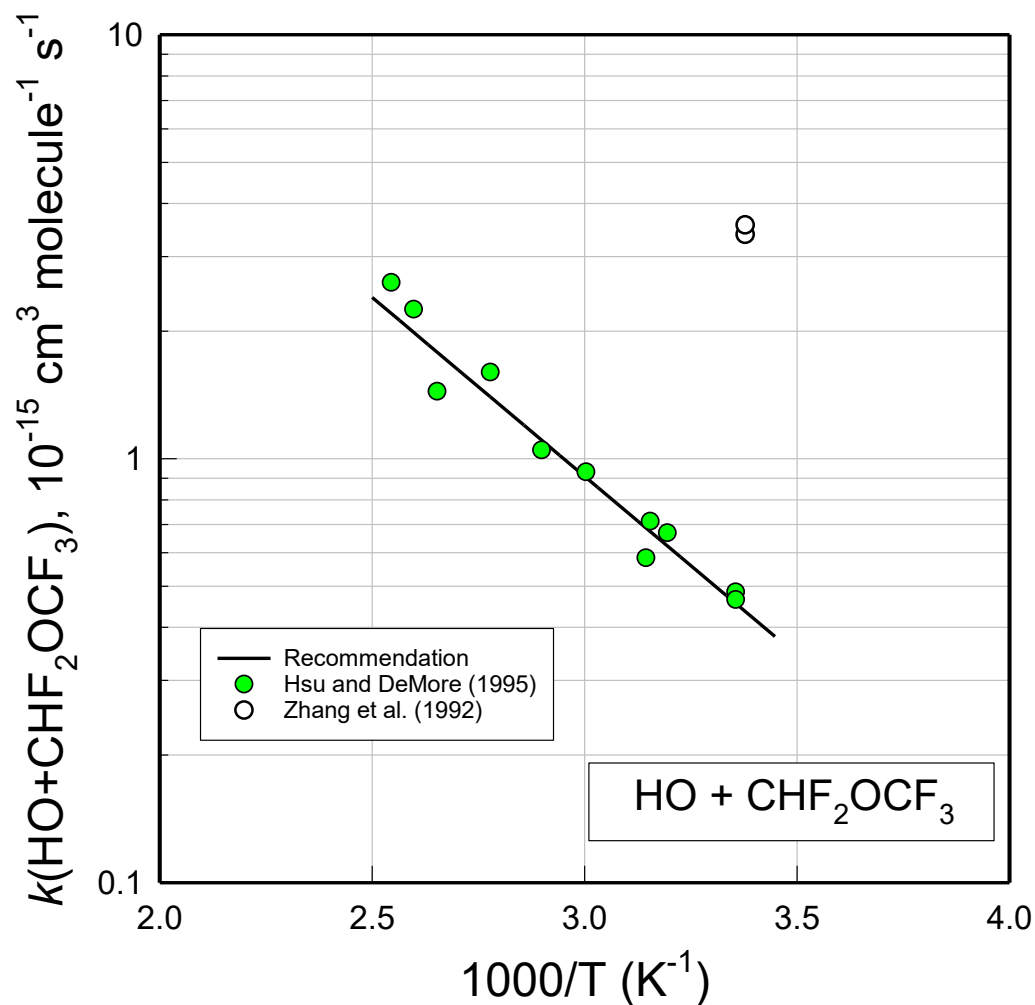

4855  
4856

4857 **oFOx141: HO + CH<sub>3</sub>OCHF<sub>2</sub>CF<sub>3</sub>**  
 4858 Last evaluated: June 2025; Last change in preferred values: June 2019.

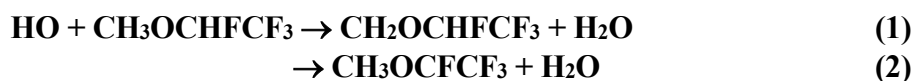

4862 **Rate coefficient data ( $k = k_1 + k_2$ )**

| $k/\text{cm}^3 \text{ molecule}^{-1} \text{ s}^{-1}$ | Temp./K | Reference          | Technique/ Comments |
|------------------------------------------------------|---------|--------------------|---------------------|
| <i>Relative Rate Coefficients</i>                    |         |                    |                     |
| $1.74 \times 10^{-12} \exp(-716/T)$                  | 253-328 | Chen et al. (2006) | RR (a)              |
| $1.57 \times 10^{-13}$                               | 298     |                    |                     |

4865 **Comments**

4866 (a) HO radicals were generated by the photolysis of ozone in the presence of water vapor in 200 Torr of  
 4867 helium diluent. Separate experiments were performed in which the loss CH<sub>3</sub>OCHF<sub>2</sub>CF<sub>3</sub> was  
 4868 measured relative to either C<sub>2</sub>H<sub>6</sub> or CH<sub>3</sub>CHF<sub>2</sub>. Placing the reported rate coefficient ratios on an  
 4869 absolute basis using  $k(\text{HO} + \text{C}_2\text{H}_6) = 6.9 \times 10^{-12} \exp(-1000/T)$  and  $k(\text{HO} + \text{CH}_3\text{CHF}_2) = 1.25 \times 10^{-12}$   
 4870  $\exp(-1070/T) \text{ cm}^3 \text{ molecule}^{-1} \text{ s}^{-1}$  (Atkinson et al. 2006, 2008) and fitting an Arrhenius expression to  
 4871 the results gives  $k(\text{HO} + \text{CH}_3\text{OCHF}_2\text{CF}_3) = 1.74 \times 10^{-12} \exp(-716/T) \text{ cm}^3 \text{ molecule}^{-1} \text{ s}^{-1}$ .

4872 **Preferred Values**

| Parameter                                            | Value                                                         | T/K            |
|------------------------------------------------------|---------------------------------------------------------------|----------------|
| $k/\text{cm}^3 \text{ molecule}^{-1} \text{ s}^{-1}$ | $1.57 \times 10^{-13}$<br>$1.74 \times 10^{-12} \exp(-716/T)$ | 298<br>250-330 |
| <i>Reliability</i>                                   |                                                               |                |
| $\Delta \log k$                                      | 0.10                                                          | 298            |
| $\Delta E/R$                                         | $\pm 100$                                                     | 250-330        |

4873 **Comments on Preferred Values**

4874 The preferred value is based on a fit to the results from the relative rate study of Chen et al.  
 4875 (2006).

4876 **References**

- 4877 Atkinson, R., Baulch, D. L., Cox, R. A., Crowley, J. N., Hampson, R. F., Hynes, R. G., Jenkin, M. E.,  
 4878 Rossi, M. J., and Troe, J.: Atmos. Chem. Phys., 6, 3625, 2006; IUPAC Task Group on Atmospheric  
 4879 Chemical Kinetic Data Evaluation, <https://iupac.aeris-data.fr/>  
 4880 Atkinson, R., Baulch, D. L., Cox, R. A., Crowley, J. N., Hampson, R. F., Hynes, R. G., Jenkin, M. E.,  
 4881 Rossi, M. J., Troe, J., and Wallington, T. J.: Atmos. Chem. Phys., 8, 4141, 2008; IUPAC  
 4882 Subcommittee for Gas Kinetic Data Evaluation, <https://iupac.aeris-data.fr/>.  
 4883 Chen, L., Kutsuna, S., Tokuhashi, K., and Sekiya, A.: J. Phys. Chem., 110, 12845, 2006.

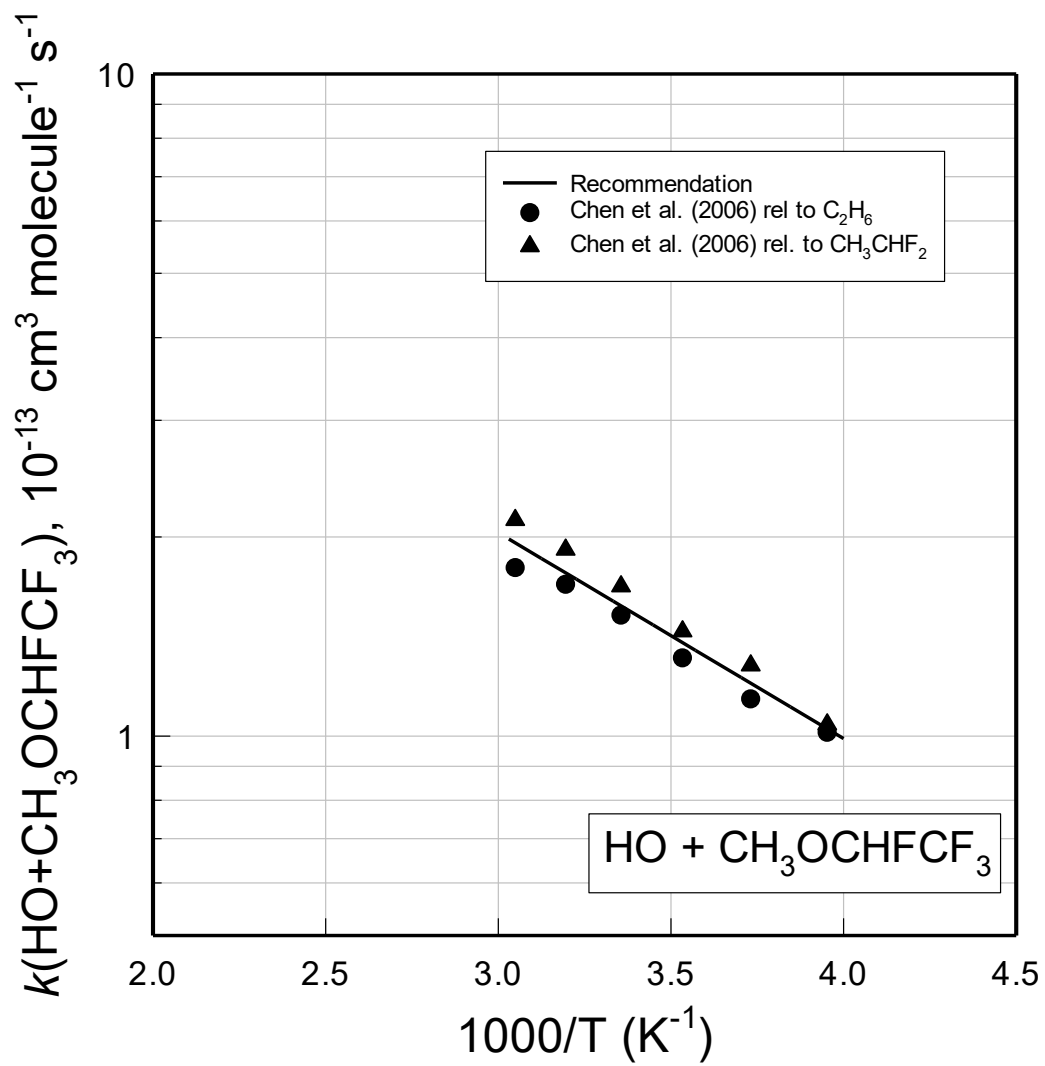

4894  
4895

4896 **oFOx142: HO + CH<sub>3</sub>OCF<sub>2</sub>CHF<sub>2</sub>**  
 4897 Last evaluated: June 2025; Last change in preferred values: June 2019.

4898  
 4899  
 4900  
 4901  
 4902  
 4903

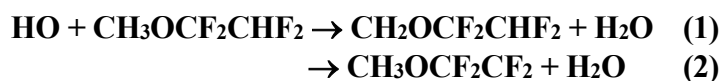

**Rate coefficient data ( $k = k_1 + k_2$ )**

| $k/\text{cm}^3 \text{ molecule}^{-1} \text{ s}^{-1}$ | Temp./K | Reference                | Technique/ Comments |
|------------------------------------------------------|---------|--------------------------|---------------------|
| <i>Absolute Rate Coefficients</i>                    |         |                          |                     |
| $(1.63 \pm 0.32) \times 10^{-13}$                    | 298     | Heathfield et al. (1998) | PR-UVA (a)          |
| $2.60 \times 10^{-12} \exp[(-1420)/T]$               | 250-430 | Tokuhashi et al. (2000)  | LP/FP/DF-LIF (b)    |
| $2.56 \times 10^{-14}$                               | 298     |                          |                     |

4904  
 4905  
 4906  
 4907  
 4908  
 4909  
 4910  
 4911  
 4912  
 4913  
 4914  
 4915  
 4916  
 4917  
 4918  
 4919

**Comments**

- (a) HO radicals were generated by the pulsed radiolysis of 1000 mbar of argon in the presence of 18 mbar of water vapor. The decay of HO radicals was monitored using UV absorption at 309 nm.
- (b) Three different absolute rate methods were employed by Tokuhashi et al. (2000): LP-LIF, FP-LIF, and DF-LIF. HO radicals in the LP-LIF experiments were generated by the photolysis (ArF laser) of N<sub>2</sub>O to produce O(<sup>1</sup>D) atoms in the presence of H<sub>2</sub>O in 20-60 Torr (27-80 mbar) of helium diluent. HO radicals in the FP-LIF experiments were generated by the photolysis (Xe flash lamp,  $\lambda < 180 \text{ nm}$ ) of H<sub>2</sub>O in 20-40 Torr (27-53 mbar) argon diluent. HO radicals in the DF-LIF experiments were generated by the reaction of H atoms with NO<sub>2</sub> in 5-6 Torr (7-8 mbar) of argon diluent. There was good agreement between the results from experiments using the three different techniques. The value at 298 K cited above is the average obtained using the different techniques.

**Preferred Values**

| Parameter                                            | Value                                                          | T/K            |
|------------------------------------------------------|----------------------------------------------------------------|----------------|
| $k/\text{cm}^3 \text{ molecule}^{-1} \text{ s}^{-1}$ | $2.24 \times 10^{-14}$<br>$2.50 \times 10^{-12} \exp(-1405/T)$ | 298<br>240-440 |
| <i>Reliability</i>                                   |                                                                |                |
| $\Delta \log k$                                      | 0.10                                                           | 298            |
| $\Delta E/R$                                         | $\pm 100$                                                      | 240-440        |

4920  
 4921  
 4922  
 4923  
 4924  
 4925  
 4926  
 4927  
 4928  
 4929  
 4930  
 4931

*Comments on Preferred Values*

The preferred values are based on a fit to the results from the comprehensive study of Tokuhashi et al. (2000) in which three different absolute rate techniques were applied and extra care was taken in purifying the samples. The results from the study by Heathfield et al. (1998) at 298 K are approximately a factor of 6 higher than from Tokuhashi et al. (2000) and probably reflect the presence of reactive impurities in the samples used.

4932  
4933  
4934  
4935  
4936  
4937  
4938  
4939

### References

Heathfield, A. E., Anastasi, C., McCulloch, A., and Nicolaisen, F. M.: Atmos. Environ., 32, 2825, 1998.  
Tokuhashi, K., Takahashi, A., Kaise, M., Kondo, S., Sekiya, A., Yamashita, S., and Ito, H.: J. Phys. Chem., 104, 1165, 2000.

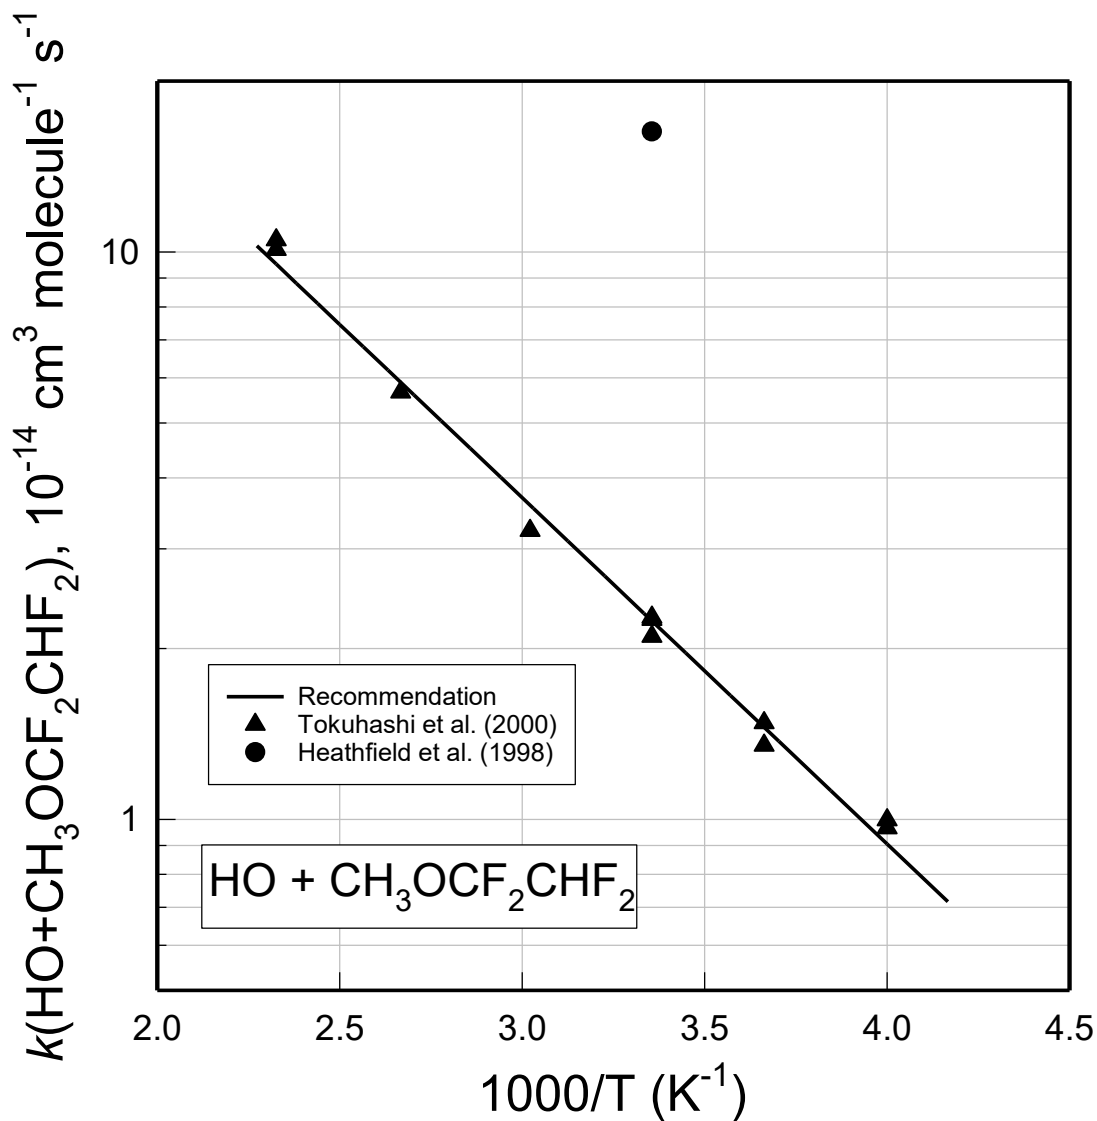

4940  
4941  
4942

4943  
4944  
4945  
4946  
4947  
4948  
4949  
4950  
4951

**oFOx143: HO + CH<sub>3</sub>OCH<sub>2</sub>CF<sub>3</sub>**

Last evaluated: February 2026; Last change in preferred values: February 2026.

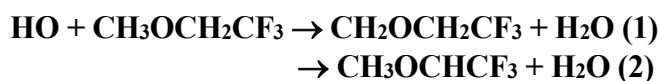

**Rate coefficient data ( $k = k_1 + k_2$ )**

| $k/\text{cm}^3 \text{ molecule}^{-1} \text{ s}^{-1}$    | Temp./K | Reference                | Technique/ Comments |
|---------------------------------------------------------|---------|--------------------------|---------------------|
| <i>Absolute Rate Coefficients</i>                       |         |                          |                     |
| $(6.24 \pm 0.67) \times 10^{-13}$                       | 296     | Zhang et al. (1992)      | FP-RF (a)           |
| $(3.88 \pm 0.89) \times 10^{-12} \exp[-(508 \pm 69)/T]$ | 263-353 | Blázquez et al. (2022)   | PLP-LIF (b)         |
| $(6.88 \pm 0.21) \times 10^{-13}$                       | 298     |                          |                     |
| <i>Relative Rate Coefficients</i>                       |         |                          |                     |
| $(6.4 \pm 0.5) \times 10^{-13}$                         | 298     | Nolan et al. (1999)      | RR (c)              |
| $(6.24 \pm 0.33) \times 10^{-13}$                       | 298     | Oyaro et al. (2005)      | RR (d)              |
| $(5.17 \pm 0.54) \times 10^{-13}$                       |         |                          |                     |
| $(4.71 \pm 0.37) \times 10^{-13}$                       | 296     | Østerstrøm et al. (2011) | RR (e)              |
| $(4.16 \pm 0.39) \times 10^{-13}$                       |         |                          |                     |

4952  
4953  
4954  
4955  
4956  
4957  
4958  
4959  
4960  
4961  
4962  
4963  
4964  
4965  
4966  
4967  
4968  
4969  
4970  
4971  
4972  
4973  
4974  
4975  
4976  
4977  
4978  
4979

**Comments**

- (a) HO radicals were generated by the photolysis of water vapor in 35 Torr (47 mbar) of argon diluent and monitored by resonance fluorescence.
- (b) HO radicals were generated by the photolysis of H<sub>2</sub>O<sub>2</sub> at 248 nm in 50-500 Torr of helium diluent and monitored by laser induce fluorescence.
- (c) HO radicals were generated by the 254 nm photolysis of ozone in the presence of water vapor in 1 atmosphere of air diluent. The reference compound was not specified.
- (d) HO radicals were produced by the photolysis of O<sub>3</sub> at 254 nm in the presence of H<sub>2</sub> in 1013 mbar of air diluent. The loss of CH<sub>3</sub>OCH<sub>2</sub>CF<sub>3</sub> was monitored relative to those of CHCl<sub>3</sub> and CH<sub>3</sub>C(O)OCH<sub>3</sub> by GC/MS. Rate coefficient ratios of  $k(\text{HO} + \text{CH}_3\text{OCH}_2\text{CF}_3)/k(\text{HO} + \text{CHCl}_3) = 5.94 \pm 0.31$  and  $k(\text{HO} + \text{CH}_3\text{OCH}_2\text{CF}_3)/k(\text{HO} + \text{CH}_3\text{C}(\text{O})\text{OCH}_3) = 2.87 \pm 0.305$  were reported. Using  $k(\text{HO} + \text{CHCl}_3) = 1.05 \times 10^{-13}$  and  $k(\text{HO} + \text{CH}_3\text{C}(\text{O})\text{OCH}_3) = 1.8 \times 10^{-13} \text{ cm}^3 \text{ molecule}^{-1} \text{ s}^{-1}$  at 298 K (Atkinson et al., 2006, 2008) gives  $k(\text{HO} + \text{CH}_3\text{OCH}_2\text{CF}_3) = (6.24 \pm 0.33) \times 10^{-13}$  and  $(5.17 \pm 0.54) \times 10^{-13} \text{ cm}^3 \text{ molecule}^{-1} \text{ s}^{-1}$ .
- (e) HO radicals were generated by the photolysis of CH<sub>3</sub>ONO in 700 Torr of air diluent in the presence of NO. The loss of CH<sub>3</sub>OCH<sub>2</sub>CF<sub>3</sub> was monitored indirectly by the formation of its oxidation product COF<sub>2</sub> and was measured relative to that of C<sub>2</sub>H<sub>2</sub> and C<sub>2</sub>H<sub>4</sub>. Rate coefficient ratios of  $k(\text{HO} + \text{CH}_3\text{OCH}_2\text{CF}_3)/k(\text{HO} + \text{C}_2\text{H}_2) = 0.63 \pm 0.05$  and  $k(\text{HO} + \text{CH}_3\text{OCH}_2\text{CF}_3)/k(\text{HO} + \text{C}_2\text{H}_4) = 0.053 \pm 0.005$  were reported. Using  $k(\text{HO} + \text{C}_2\text{H}_2) = 7.47 \times 10^{-13}$  and  $k(\text{HO} + \text{C}_2\text{H}_4) = 7.85 \times 10^{-12} \text{ cm}^3 \text{ molecule}^{-1} \text{ s}^{-1}$  in 700 Torr of air at 296 K (Atkinson et al., 2006) gives  $k(\text{HO} + \text{CH}_3\text{OCH}_2\text{CF}_3) = (4.71 \pm 0.37) \times 10^{-13}$  and  $(4.16 \pm 0.39) \times 10^{-13} \text{ cm}^3 \text{ molecule}^{-1} \text{ s}^{-1}$ .

4980  
4981

### Preferred Values

| Parameter                                              | Value                               | T/K     |
|--------------------------------------------------------|-------------------------------------|---------|
| $k / \text{cm}^3 \text{ molecule}^{-1} \text{ s}^{-1}$ | $6.56 \times 10^{-13}$              | 298     |
| $k / \text{cm}^3 \text{ molecule}^{-1} \text{ s}^{-1}$ | $3.61 \times 10^{-12} \exp(-508/T)$ | 260-360 |
| <i>Reliability</i>                                     |                                     |         |
| $\Delta \log k$                                        | 0.10                                | 298     |
| $\Delta E/R$                                           | 300                                 | 260-360 |

4982

#### Comments on Preferred Values

4983 The absolute rate measurements by Zhang et al. (1992) and Blázquez et al. (2022) at 298 K are in  
4984 excellent agreement. Taking an average of the results from these studies gives the recommended rate  
4985 coefficient at 298 K. The temperature dependence is taken from Blázquez et al. (2022) and the  
4986 preexponential factor is scaled to reproduce the recommended  $k(298\text{K})$  value. The results from the  
4987 relative rate studies by Nolan et al. (1999) and Oyaro et al. (2005) are in good agreement while those  
4988 from Østerstøm et al. (2012) are approximately 30% lower. Østerstøm et al. (2012) measured the loss  
4989 of  $\text{CH}_3\text{OCH}_2\text{CF}_3$  indirectly by the formation of its oxidation product  $\text{COF}_2$  and assuming a molar yield  
4990 of 45% which was determined in separate experiments. Given the good agreement of the results from  
4991 the relative rate studies of Nolan et al. (1999) and Oyaro et al. (2005) with the absolute rate studies by  
4992 Zhang et al. (1992) and Blázquez et al. (2022), it appears there were problems associated with the  
4993 indirect method of monitoring loss of  $\text{CH}_3\text{OCH}_2\text{CF}_3$  used by Østerstøm et al. (2012).  
4994

4995

4996

### References

4997

- 4998 Atkinson, R., Baulch, D. L., Cox, R. A., Crowley, J. N., Hampson, R. F., Hynes, R. G., Jenkin, M.  
4999 E., Rossi, M. J., and Troe, J.: Atmos. Chem. Phys., 6, 3625, 2006; IUPAC Task Group on  
5000 Atmospheric Chemical Kinetic Data Evaluation, <https://iupac.aeris-data.fr/>.  
5001 Atkinson, R., Baulch, D. L., Cox, R. A., Crowley, J. N., Hampson, R. F., Hynes, R. G., Jenkin, M. E.,  
5002 Rossi, M. J., Troe, J., and Wallington, T. J.: Atmos. Chem. Phys., 9, 4141, 2008; IUPAC Task  
5003 Group on Atmospheric Chemical Kinetic Data Evaluation, <https://iupac.aeris-data.fr/>.  
5004 Blázquez, S., Espinosa, S., Antinõlo, M., Albaladejo, J., and Jiménez, E.: Phys. Chem. Chem. Phys.,  
5005 24, 14354, 2022.  
5006 Nolan, S., O'Sullivan, N., Wenger, J., Sidebottom, H., and Treacy, J.: in: R. Djahjhs (Ed.),  
5007 Proceedings of EUROTRAC Symposium '98: Transport and Chemical Transformation in the  
5008 Troposphere, Garmisch-Partenkirchen, Germany, March 23-27, 1998, WIT Press, Ashurst,  
5009 Southampton, UK, 1999, pp. 1–120.  
5010 Østerstøm, F. F., Nielsen, O. J., Sulbæk Andersen, M. P., and Wallington, T. J.: Chem. Phys. Lett, 524,  
5011 32, 2012.  
5012 Oyaro, N., Sellevåg, S. R., and Nielsen, C. J.: J. Phys. Chem. A, 109, 337, 2005.  
5013 Zhang, Z., Saini, R. D., Kurylo, M. J., and Huie, R. E.: J. Phys. Chem., 96, 9301, 1992.  
5014  
5015

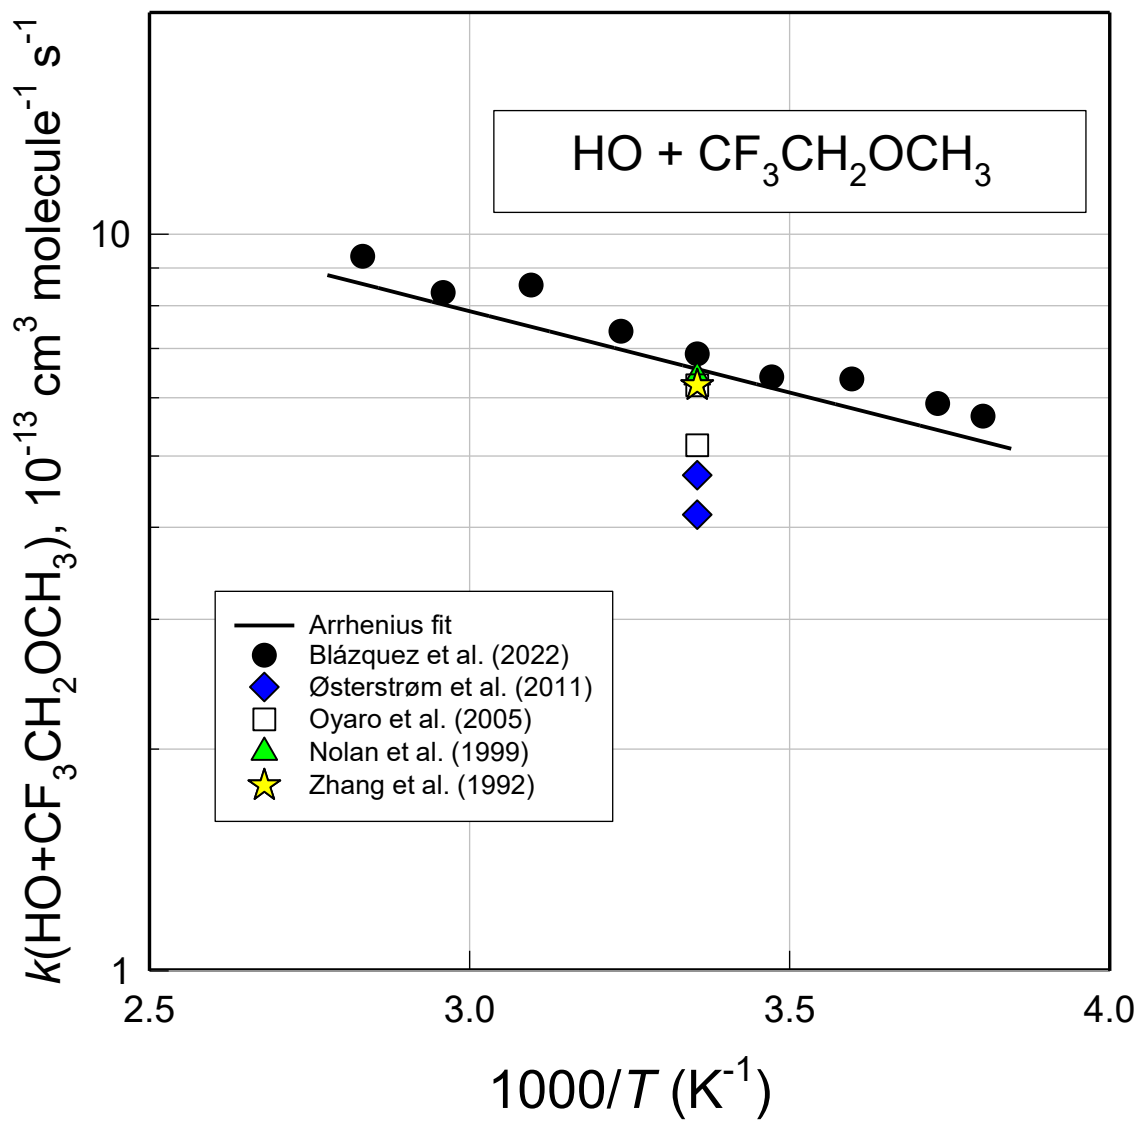

5016  
5017  
5018  
5019

5020 **oFOx144: HO + CH<sub>3</sub>OCF<sub>2</sub>CF<sub>3</sub>**  
 5021 Last evaluated: June 2025; Last change in preferred values: June 2019.

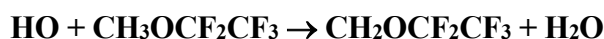

5023 **Rate coefficient data**

| <i>k</i> /cm <sup>3</sup> molecule <sup>-1</sup> s <sup>-1</sup>                                             | Temp./K        | Reference                | Technique/ Comments |
|--------------------------------------------------------------------------------------------------------------|----------------|--------------------------|---------------------|
| <i>Absolute Rate Coefficients</i>                                                                            |                |                          |                     |
| (1.90 <sup>+0.90</sup> <sub>-0.61</sub> × 10 <sup>-12</sup> ) exp[(-1510±120)/T]<br>1.12 × 10 <sup>-14</sup> | 250-430<br>298 | Tokuhashi et al. (1999)  | LP/FP/DF-LIF (a)    |
| <i>Relative Rate Coefficients</i>                                                                            |                |                          |                     |
| (1.12±0.15) × 10 <sup>-14</sup>                                                                              | 296            | Østerstrøm et al. (2016) | RR (b)              |

5027 **Comments**

- 5028  
5029  
5030 (a) Three different absolute rate methods were employed by Tokuhashi et al. (1999): LP-LIF, FP-LIF, and  
 5031 DF-LIF. HO radicals in the LP-LIF experiments were generated by the photolysis (ArF laser) of N<sub>2</sub>O  
 5032 to produce O(<sup>1</sup>D) atoms in the presence of H<sub>2</sub>O in 20-60 Torr (27-80 mbar) of helium diluent. HO  
 5033 radicals in the FP-LIF experiments were generated by the photolysis (Xe flash lamp, λ < 180 nm) of  
 5034 H<sub>2</sub>O in 10-40 Torr (13-53 mbar) argon diluent. HO radicals in the DF-LIF experiments were  
 5035 generated by the reaction of H atoms with NO<sub>2</sub> in 5-6 Torr (7-8 mbar) of argon diluent. There was  
 5036 good agreement between the results from experiments using the three different techniques. The value  
 5037 at 298 K cited above is the average obtained using the different techniques.  
 5038 (b) Photolysis of CH<sub>3</sub>ONO in 700 Torr (933 mbar) of air diluent was used to generate HO radicals. The  
 5039 loss of CH<sub>3</sub>OC<sub>2</sub>F<sub>5</sub> was measured indirectly by measuring the formation of the product C<sub>2</sub>F<sub>5</sub>OCHO.  
 5040 C<sub>2</sub>H<sub>2</sub> was used as the reference and a rate coefficient ratio  $k(\text{CH}_3\text{OC}_2\text{F}_5)/k(\text{C}_2\text{H}_2) = 0.015 \pm 0.002$  was  
 5041 reported. Using  $k(\text{HO} + \text{C}_2\text{H}_2) = 7.47 \times 10^{-13}$  (Atkinson et al., 2006) gives  $k(\text{HO} + \text{CH}_3\text{OC}_2\text{F}_5) =$   
 5042  $(1.12 \pm 0.15) \times 10^{-14}$  cm<sup>3</sup> molecule<sup>-1</sup> s<sup>-1</sup>.

5043 **Preferred Values**

| Parameter                                                        | Value                                                             | T/K            |
|------------------------------------------------------------------|-------------------------------------------------------------------|----------------|
| <i>k</i> /cm <sup>3</sup> molecule <sup>-1</sup> s <sup>-1</sup> | 1.20 × 10 <sup>-14</sup><br>1.84 × 10 <sup>-12</sup> exp(-1499/T) | 298<br>240-440 |
| <i>Reliability</i>                                               |                                                                   |                |
| Δ log <i>k</i>                                                   | 0.10                                                              | 298            |
| Δ E/R                                                            | ±100                                                              | 240-440        |

5046 **Comments on Preferred Values**

5047  
5048  
5049 The preferred values are based on a fit to the results from the comprehensive study of  
 5050 Tokuhashi et al. (2000) in which three different absolute rate techniques were applied and extra care  
 5051 was taken in purifying the samples. The results reported in the relative rate study by Østerstrøm are  
 5052 consistent with the preferred values.

5053  
5054  
5055  
5056  
5057  
5058  
5059  
5060  
5061  
5062  
5063

## References

- Atkinson, R., Baulch, D. L., Cox, R. A., Crowley, J. N., Hampson, R. F., Hynes, R. G., Jenkin, M. E., Rossi, M. J., and Troe, J.: Atmos. Chem. Phys., 6, 3625, 2006; IUPAC Task Group on Atmospheric Chemical Kinetic Data Evaluation, <https://iupac.aeris-data.fr/>
- Østerstrøm, F. F., Nielsen, O. J., and Wallington, T. J.: Chem. Phys. Lett., 653, 149, 2016.
- Tokuhashi, K., Takahashi, A., Kaise, M., Kondo, S., Sekiya, A., Yamashita, S., and Ito, H.: Int. J. Chem. Kinet., 31, 846, 1999.

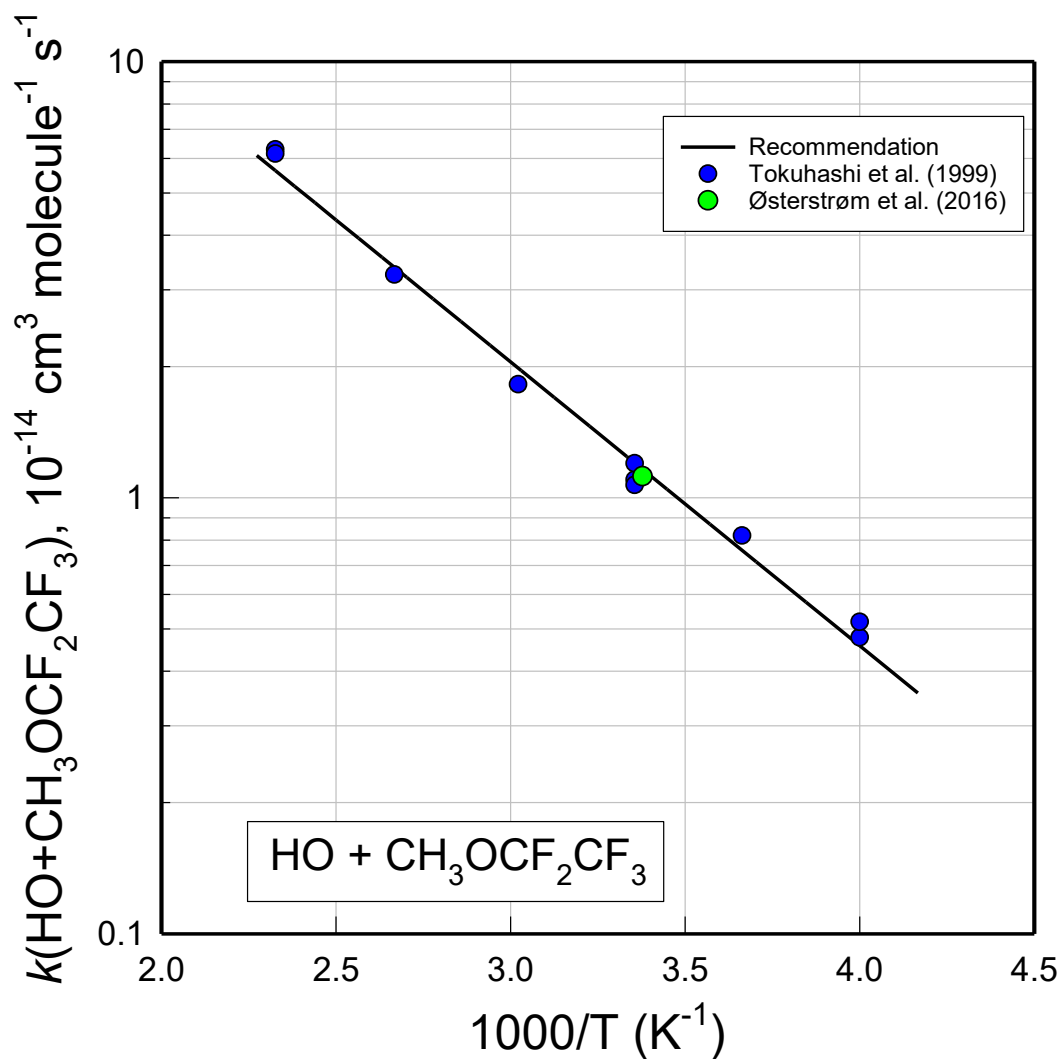

5064  
5065

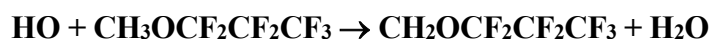

5070 **Rate coefficient data**

| <i>k</i> /cm <sup>3</sup> molecule <sup>-1</sup> s <sup>-1</sup>                | Temp./K | Reference               | Technique/ Comments |
|---------------------------------------------------------------------------------|---------|-------------------------|---------------------|
| <i>Absolute Rate Coefficients</i>                                               |         |                         |                     |
| (2.06 <sup>+0.58</sup> <sub>-0.45</sub> × 10 <sup>-12</sup> ) exp[(-1540±80)/T] | 250-430 | Tokuhashi et al. (1999) | LP/FP/DF-LIF (a)    |
| 1.13 × 10 <sup>-14</sup>                                                        | 298     |                         |                     |
| (2.0 <sup>+1.2</sup> <sub>-0.7</sub> ) × 10 <sup>-11</sup> exp [(-2130±290/T)]  | 288-368 | Bravo et al. (2010)     | DF-MS (b)           |
| (1.54±0.05) × 10 <sup>-14</sup>                                                 | 298     |                         |                     |
| <i>Relative Rate Coefficients</i>                                               |         |                         |                     |
| 1.11 × 10 <sup>-14</sup>                                                        | 295     | Ninomiya et al. (2000)  | RR (c)              |

5073 **Comments**

- 5074
- 5075
- 5076 (a) Three different absolute rate methods were employed by Tokuhashi et al. (1999): LP-LIF, FP-LIF, and  
 5077 DF-LIF. HO radicals in the LP-LIF experiments were generated by the photolysis (ArF laser) of  
 5078 N<sub>2</sub>O to produce O(<sup>1</sup>D) atoms in the presence of H<sub>2</sub>O in 20-60 Torr (27-80 mbar) of helium diluent.  
 5079 HO radicals in the FP-LIF experiments were generated by the photolysis (Xe flash lamp, λ < 180  
 5080 nm) of H<sub>2</sub>O in 20-40 Torr (27-53 mbar) argon diluent. HO radicals in the DF-LIF experiments were  
 5081 generated by the reaction of H atoms with NO<sub>2</sub> in 5-6 Torr (7-8 mbar) of argon diluent. There was  
 5082 good agreement between the results from experiments using the three different techniques. The  
 5083 value at 298 K cited above is the average obtained using the different techniques.
- 5084 (b) F atoms produced in a microwave discharge of F<sub>2</sub>/He mixtures were reacted with H<sub>2</sub>O to generate  
 5085 HO radicals. Experiments were conducted in a flow tube at a pressure of 1 Torr of helium diluent.  
 5086 HO radicals were monitored by mass spectroscopy by adding I<sub>2</sub> and detecting the HOI product.
- 5087 (c) HO radicals were generated by the photolysis of O<sub>3</sub> at 254 nm in the presence of water vapor.  
 5088 Experiments were performed in approximately 200 Torr of helium diluent in the presence of 3-5  
 5089 Torr of ozone and 2-3 Torr of water vapor. The loss of CH<sub>3</sub>OC<sub>3</sub>F<sub>7</sub> was measured relative to those of  
 5090 CH<sub>4</sub> and CH<sub>3</sub>Cl and rate coefficient ratios of  $k(\text{HO} + \text{CH}_3\text{OC}_3\text{F}_7)/k(\text{HO} + \text{CH}_4) = 1.68 \pm 0.20$  and  
 5091  $k(\text{HO} + \text{CH}_3\text{OC}_3\text{F}_7)/k(\text{HO} + \text{CH}_3\text{Cl}) = 0.35 \pm 0.03$  were reported. Using  $k(\text{HO} + \text{CH}_4) = 6.01 \times 10^{-15}$   
 5092 and  $k(\text{HO} + \text{CH}_3\text{Cl}) = 3.47 \times 10^{-14}$  at 295 K (Atkinson et al., 2006) gives  $k(\text{HO} + \text{CH}_3\text{OC}_3\text{F}_7) =$   
 5093  $(1.01 \pm 0.12) \times 10^{-14}$  and  $(1.21 \pm 0.10) \times 10^{-14}$  cm<sup>3</sup> molecule<sup>-1</sup> s<sup>-1</sup>.

5094 **Preferred Values**

| Parameter                                                        | Value                                 | T/K     |
|------------------------------------------------------------------|---------------------------------------|---------|
| <i>k</i> /cm <sup>3</sup> molecule <sup>-1</sup> s <sup>-1</sup> | 1.18 × 10 <sup>-14</sup>              | 298     |
|                                                                  | 1.98 × 10 <sup>-12</sup> exp(-1526/T) | 240-440 |
| <i>Reliability</i>                                               |                                       |         |
| Δ log <i>k</i>                                                   | 0.10                                  | 298     |
| Δ E/R                                                            | ±100                                  | 240-440 |

5097  
5098  
5099  
5100  
5101  
5102  
5103  
5104  
5105  
5106  
5107  
5108  
5109  
5110  
5111  
5112  
5113  
5114  
5115  
5116  
5117  
5118  
5119  
5120  
5121

### *Comments on Preferred Values*

The preferred values are based on a fit to the results from the comprehensive study of Tokuhashi et al. (1999) in which three different absolute rate techniques were applied and care was taken in purifying the samples. The results from the relative rate study by Ninomiya et al. (2000) are in excellent agreement with the results from the absolute study by Tokuhashi et al. (1999). The results from the study by Bravo et al. (2010) are approximately 40-60% higher than those from Tokuhashi et al. (1999). Tokuhashi et al. (1999) showed that reactive impurities can be a complication and purified their sample of  $\text{CH}_3\text{OCF}_2\text{CF}_2\text{CF}_3$  before use. Bravo et al. (2010) did not purify their sample and the presence of reactive impurities may explain the larger rate coefficients observed in their study.

### References

- Atkinson, R., Baulch, D. L., Cox, R. A., Crowley, J. N., Hampson, R. F., Hynes, R. G., Jenkin, M. E., Rossi, M. J., and Troe, J.: *Atmos. Chem. Phys.*, 6, 3625, 2006; IUPAC Task Group on Atmospheric Chemical Kinetic Data Evaluation, <https://iupac.aeris-data.fr/>
- Bravo, I., Diaz-de-Mera, Y., Aranda, A., Smith, K., Shine, K. P., and Marston, G.: *Phys. Chem. Chem. Phys.*, 12, 5115, 2010.
- Ninomiya, Y., Kawasaki, M., Guschin, A., Molina, L. T., Molina, M. J., and Wallington, T. J.: *Environ. Sci. Tech.*, 34, 2973, 2000.
- Tokuhashi, K., Takahashi, A., Kaise, M., Kondo, S., Sekiya, A., Yamashita, S., and Ito, H.: *Int. J. Chem. Kinet.*, 31, 846, 1999.

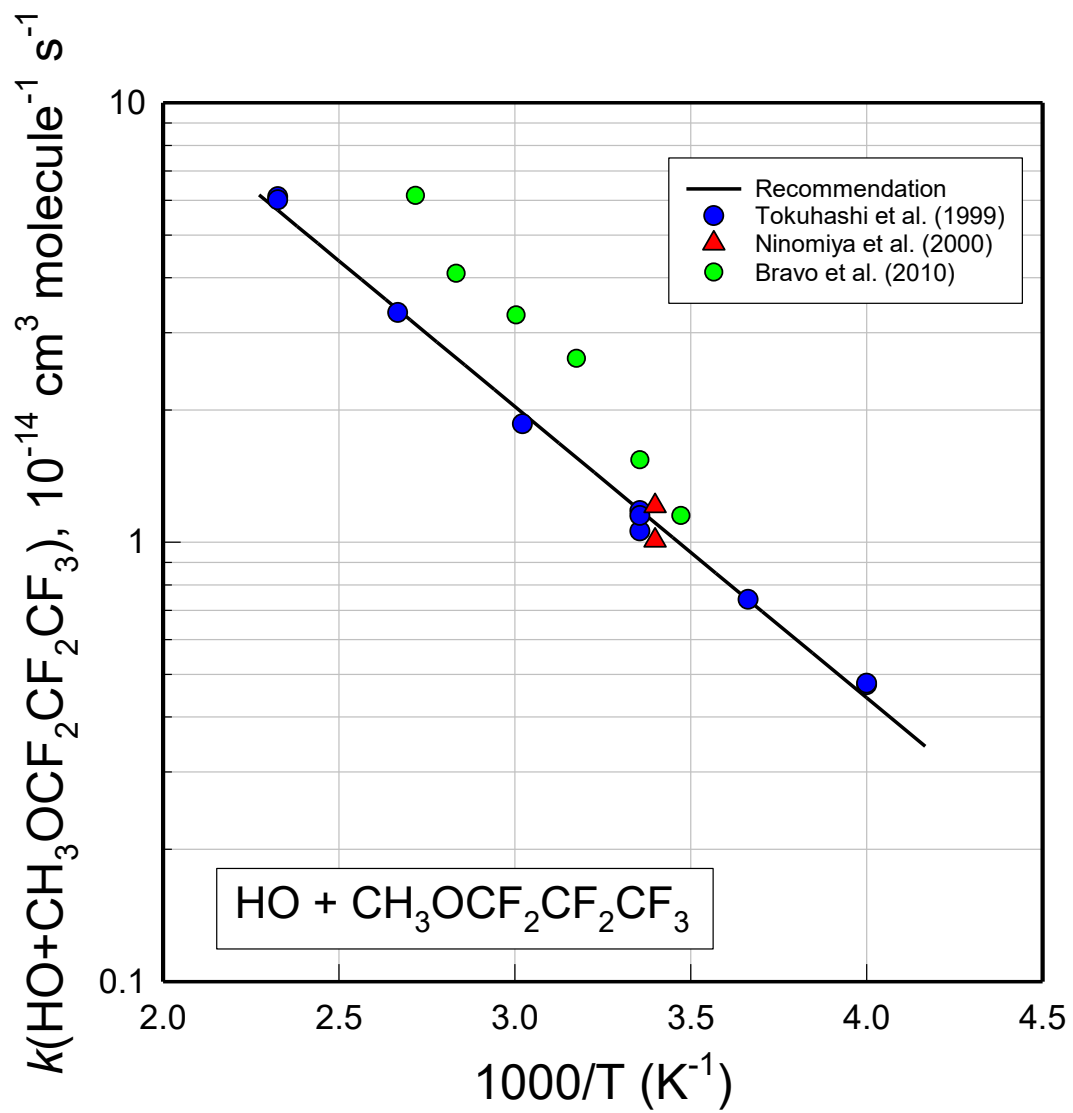

5122  
5123

5124 **oFOx146: HO + CH<sub>3</sub>OCF(CF<sub>3</sub>)<sub>2</sub>**  
 5125 Last evaluated: June 2025; Last change in preferred values: June 2019.

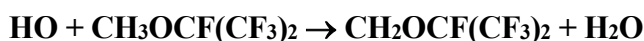

5127 **Rate coefficient data**

| <i>k</i> /cm <sup>3</sup> molecule <sup>-1</sup> s <sup>-1</sup>                                            | Temp./K        | Reference               | Technique/ Comments |
|-------------------------------------------------------------------------------------------------------------|----------------|-------------------------|---------------------|
| <i>Absolute Rate Coefficients</i>                                                                           |                |                         |                     |
| (1.94 <sup>+0.48</sup> <sub>-0.38</sub> × 10 <sup>-12</sup> ) exp[(-1450±70)/T]<br>1.48 × 10 <sup>-14</sup> | 250-430<br>298 | Tokuhashi et al. (1999) | LP/FP/DF-LIF (a)    |
| <i>Relative Rate Coefficients</i>                                                                           |                |                         |                     |
| (1.37 ± 0.13) × 10 <sup>-14</sup>                                                                           | 296            | Andersen et al. (2014)  | RR (b)              |

5131 **Comments**

- 5132 (a) Three different absolute rate methods were employed by Tokuhashi et al. (1999): LP-LIF, FP-LIF, and  
 5133 DF-LIF. HO radicals in the LP-LIF experiments were generated by the photolysis (ArF laser) of  
 5134 N<sub>2</sub>O to produce O(<sup>1</sup>D) atoms in the presence of H<sub>2</sub>O in 20-60 Torr (27-80 mbar) of helium diluent.  
 5135 HO radicals in the FP-LIF experiments were generated by the photolysis (Xe flash lamp, λ < 180  
 5136 nm) of H<sub>2</sub>O in 20-40 Torr (27-53 mbar) argon diluent. HO radicals in the DF-LIF experiments were  
 5137 generated by the reaction of H atoms with NO<sub>2</sub> in 4-6 Torr (5-8 mbar) of argon diluent. There was  
 5138 good agreement between the results from experiments using the three different techniques. The  
 5139 value at 298 K cited above is the average obtained using the different techniques.  
 5140 (b) HO radicals were generated by the photolysis of CH<sub>3</sub>ONO in 700 Torr of air diluent. The loss of  
 5141 CH<sub>3</sub>OCF(CF<sub>3</sub>)<sub>2</sub> was monitored indirectly by the formation of its oxidation product (CF<sub>3</sub>)<sub>2</sub>CFOCHO  
 5142 and was measured relative to that of C<sub>2</sub>H<sub>2</sub>. A rate coefficient ratio of *k*(HO + CH<sub>3</sub>OCF(CF<sub>3</sub>)<sub>2</sub>)/*k*(HO  
 5143 + C<sub>2</sub>H<sub>2</sub>) = 0.0183 ± 0.0017 was reported. Using *k*(HO + C<sub>2</sub>H<sub>2</sub>) = 7.47 × 10<sup>-13</sup> in 700 Torr of air  
 5144 diluent at 296 K (Atkinson et al., 2006) gives *k*(HO + CH<sub>3</sub>OCF(CF<sub>3</sub>)<sub>2</sub>) = (1.37±0.13) × 10<sup>-14</sup> cm<sup>3</sup>  
 5145 molecule<sup>-1</sup> s<sup>-1</sup>.

5146 **Preferred Values**

| Parameter                                                        | Value                                                             | T/K            |
|------------------------------------------------------------------|-------------------------------------------------------------------|----------------|
| <i>k</i> /cm <sup>3</sup> molecule <sup>-1</sup> s <sup>-1</sup> | 1.52 × 10 <sup>-14</sup><br>1.86 × 10 <sup>-12</sup> exp(-1432/T) | 298<br>240-440 |
| <i>Reliability</i>                                               |                                                                   |                |
| Δ log <i>k</i>                                                   | 0.10                                                              | 298            |
| Δ E/R                                                            | ±100                                                              | 240-440        |

5151 **Comments on Preferred Values**

5152 The preferred values are based on a fit to the results from the comprehensive study of  
 5153 Tokuhashi et al. (1999) in which three different absolute rate techniques were applied and care was  
 5154 taken in purifying the samples. The results from the relative rate study by Andersen et al. (2014) are in  
 5155

5157 excellent agreement with the results from the absolute study by Tokuhashi et al. (1999).

5158

5159

5160

### References

5161 Andersen, L. L., Østerstrøm, F. F., Nielsen, O. J., Sulbaek Andersen, M. P., and Wallington, T. J. Chem.  
5162 Phys. Lett., 607, 5, 2014.

5163 Atkinson, R., Baulch, D. L., Cox, R. A., Crowley, J. N., Hampson, R. F., Hynes, R. G., Jenkin, M. E.,  
5164 Rossi, M. J., and Troe, J.: Atmos. Chem. Phys., 6, 3625, 2006; IUPAC Task Group on Atmospheric  
5165 Chemical Kinetic Data Evaluation, <https://iupac.aeris-data.fr/>

5166 Tokuhashi, K., Takahashi, A., Kaise, M., Kondo, S., Sekiya, A., Yamashita, S., and Ito, H.: Int. J. Chem.  
5167 Kinet., 31, 846, 1999.

5168

5169

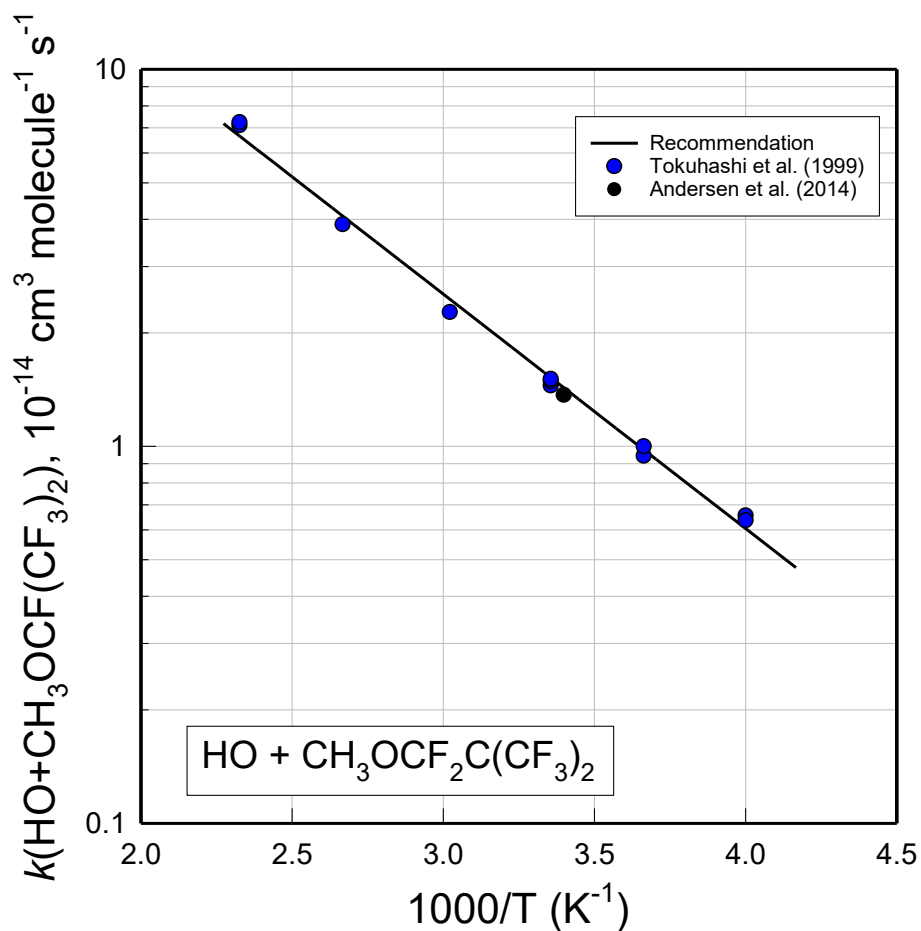

5170

5171

5174 **HO + CH<sub>3</sub>OC<sub>4</sub>F<sub>9</sub> (HFE-7100) → CH<sub>2</sub>OC<sub>4</sub>F<sub>9</sub> + H<sub>2</sub>O**

5175 **Rate coefficient data**

| $k/\text{cm}^3 \text{ molecule}^{-1} \text{ s}^{-1}$        | Temp./<br>K | Reference                                                                   | Technique/ Comments |
|-------------------------------------------------------------|-------------|-----------------------------------------------------------------------------|---------------------|
| <i>Absolute Rate Coefficients</i>                           |             |                                                                             |                     |
| $(2.8^{+3.2}_{-1.5}) \times 10^{-11} \exp(-2200 \pm 490/T)$ | 288-368     | Bravo et al. (2010)                                                         | DF-MS (a)           |
| $(1.49 \pm 0.13) \times 10^{-14}$                           | 298         |                                                                             |                     |
| <i>Relative Rate Coefficients</i>                           |             |                                                                             |                     |
| $\sim 1.2 \times 10^{-14}$                                  | 295         | Wallington et al. (1997)                                                    | RR (b)              |
| $(6.9 \pm 1.5) \times 10^{-15}$                             | 295         | Cavalli et al. (1998)                                                       | RR (c)              |
| $(1.30 \pm 0.09) \times 10^{-14}$                           | 298         | Nolan et al. (1999)                                                         | RR (d)              |
| $(1.53 \pm 0.10) \times 10^{-14}$                           | 298         | Oyaro and Nielsen (2003)                                                    | RR (e)              |
| $1.10 \times 10^{-12} \exp(-1347/T)$                        | 253-328     | Chen et al. (2011) <i>n</i> -C <sub>4</sub> F <sub>9</sub> OCH <sub>3</sub> | RR (f)              |
| $(1.19 \pm 0.12) \times 10^{-14}$                           | 298         |                                                                             |                     |
| $1.21 \times 10^{-12} \exp(-1377/T)$                        | 253-328     | Chen et al. (2011) <i>i</i> -C <sub>4</sub> F <sub>9</sub> OCH <sub>3</sub> | RR (f)              |
| $(1.19 \pm 0.12) \times 10^{-14}$                           | 298         |                                                                             |                     |

5179 **Comments**

- 5180
- 5181
- 5182 (a) F atoms produced in a microwave discharge of F<sub>2</sub>/He mixtures were reacted with H<sub>2</sub>O to generate  
 5183 HO radicals. Experiments were conducted in a flow tube at a pressure of 1 Torr of helium diluent.  
 5184 HO radicals were monitored by mass spectroscopy by adding I<sub>2</sub> and detecting the HOI product.
- 5185 (b) HO radicals were generated by the photolysis of O<sub>3</sub> at 254 nm in the presence of water vapor.  
 5186 Experiments were performed in approximately 200 Torr of helium diluent in the presence of ~1 Torr  
 5187 of ozone. The sample of CH<sub>3</sub>OC<sub>4</sub>F<sub>9</sub> was a mixture of 95% *n*-C<sub>4</sub>F<sub>9</sub>OCH<sub>3</sub> (CF<sub>3</sub>CF<sub>2</sub>CF<sub>2</sub>CF<sub>2</sub>OCH<sub>3</sub>) and  
 5188 5% *i*-C<sub>4</sub>F<sub>9</sub>OCH<sub>3</sub> ((CF<sub>3</sub>)<sub>2</sub>CF<sub>2</sub>CF<sub>2</sub>OCH<sub>3</sub>). The loss of CH<sub>3</sub>OC<sub>4</sub>F<sub>9</sub> was measured relative to those of CH<sub>4</sub>  
 5189 and CH<sub>3</sub>Cl. Two experiments with CH<sub>3</sub>Cl gave rate coefficient ratios of  $k(\text{HO} + \text{CH}_3\text{OC}_4\text{F}_9)/k(\text{HO} +$   
 5190  $\text{CH}_3\text{Cl}) = 0.35$  and  $0.32$ . Using  $k(\text{HO} + \text{CH}_3\text{Cl}) = 3.47 \times 10^{-14}$  at 295 K (Atkinson et al., 2006) gives  
 5191  $k(\text{HO} + \text{CH}_3\text{OC}_4\text{F}_9) = 1.2 \times 10^{-14}$  and  $1.1 \times 10^{-14} \text{ cm}^3 \text{ molecule}^{-1} \text{ s}^{-1}$ . Results from experiments using  
 5192 CH<sub>4</sub> were more scattered, but consistent with, those using CH<sub>3</sub>Cl as reference.
- 5193 (c) HO radicals were generated by the photolysis of O<sub>3</sub> at 254 nm in the presence of water vapor in 740  
 5194 Torr (986 mbar) of air diluent. The sample of CH<sub>3</sub>OC<sub>4</sub>F<sub>9</sub> was a mixture of 25% *n*-C<sub>4</sub>F<sub>9</sub>OCH<sub>3</sub>  
 5195 (CF<sub>3</sub>CF<sub>2</sub>CF<sub>2</sub>CF<sub>2</sub>OCH<sub>3</sub>) and 75% *i*-C<sub>4</sub>F<sub>9</sub>OCH<sub>3</sub> ((CF<sub>3</sub>)<sub>2</sub>CF<sub>2</sub>CF<sub>2</sub>OCH<sub>3</sub>). The loss of CH<sub>3</sub>OC<sub>4</sub>F<sub>9</sub> was  
 5196 measured relative to that of CH<sub>4</sub>. Rescaling the result using  $k(\text{HO} + \text{CH}_4) = 6.01 \times 10^{-15}$  at 295 K  
 5197 (Atkinson et al., 2006) gives  $k(\text{HO} + \text{CH}_3\text{OC}_4\text{F}_9) = (6.9 \pm 1.5) \times 10^{-15} \text{ cm}^3 \text{ molecule}^{-1} \text{ s}^{-1}$ .
- 5198 (d) HO radicals were generated by the 254 nm photolysis of ozone in the presence of water vapor in 1  
 5199 atmosphere of air diluent. Neither the isomeric composition of CH<sub>3</sub>OC<sub>4</sub>F<sub>9</sub>, nor the reference  
 5200 compound used, was specified.
- 5201 (e) HO radicals were generated by the photolysis of ozone in the presence of hydrogen in 1 atmosphere  
 5202 of air diluent. The loss of CH<sub>3</sub>OC<sub>4</sub>F<sub>9</sub> was measured relative to CH<sub>3</sub>CN and CHCl<sub>3</sub> using GC-MS  
 5203 and rate coefficient ratios of  $0.663 \pm 0.009$  and  $0.151 \pm 0.004$  were reported, respectively. Using  
 5204  $k(\text{HO} + \text{CH}_3\text{CN}) = 2.2 \times 10^{-14}$  and  $k(\text{HO} + \text{CHCl}_3) = 1.05 \times 10^{-13}$  (IUPAC 2024) gives  $k(\text{HO} +$   
 5205  $\text{CH}_3\text{OC}_4\text{F}_9) = (1.46 \pm 0.02) \times 10^{-14}$  and  $(1.59 \pm 0.04) \times 10^{-14} \text{ cm}^3 \text{ molecule}^{-1} \text{ s}^{-1}$ . The average with

5206 uncertainties that encompass the extremes of the ranges is  $k(\text{HO}+\text{CH}_3\text{OC}_4\text{F}_9) = (1.53 \pm 0.10) \times 10^{-14}$   
 5207  $\text{cm}^3 \text{ molecule}^{-1} \text{ s}^{-1}$ . The commercial sample of  $\text{CH}_3\text{OC}_4\text{F}_9$  used was an approximately 50:50 mixture  
 5208 of the *n*- and *i*- isomers. The isomers could not be resolved, and the measured rate coefficient is for  
 5209 the mixture.

5210 (f) HO radicals were produced by the 254 nm photolysis of ozone in the presence of water vapor. The  
 5211 commercial sample of  $\text{C}_4\text{F}_9\text{OCH}_3$  obtained for the experiments was a mixture of 36% *n*-  $\text{C}_4\text{F}_9\text{OCH}_3$   
 5212 and 64% *i*- $\text{C}_4\text{F}_9\text{OCH}_3$ . GC-FID was used to monitor the decay of  $\text{C}_4\text{F}_9\text{OCH}_3$  and the reference  
 5213 compounds ( $\text{CF}_3\text{OCH}_3$  and  $\text{C}_2\text{F}_5\text{OCH}_3$ ). The two isomers were resolved and rate coefficient ratios  
 5214 for both isomers were reported. Scaling the reported ratios using the IUPAC preferred values of  
 5215  $k(\text{HO}+\text{CF}_3\text{OCH}_3) = 1.15 \times 10^{-12} \exp(-1324/T)$  and  $k(\text{HO}+\text{C}_2\text{F}_5\text{OCH}_3) = 1.84 \times 10^{-12} \exp(-1499/T)$   
 5216 (IUPAC, 2023) and fitting the Arrhenius expression to the results gives  $k(\text{HO}+n\text{-C}_4\text{F}_9\text{OCH}_3) = 1.10 \times$   
 5217  $10^{-12} \exp(-1347/T)$  and  $k(\text{HO}+i\text{-C}_4\text{F}_9\text{OCH}_3) = 1.21 \times 10^{-12} \exp(-1377/T) \text{ cm}^3 \text{ molecule}^{-1} \text{ s}^{-1}$ . As  
 5218 shown in the figure below, there is no observable difference in the reactivity of the different isomers.  
 5219 A fit to the combined data set gives  $k(\text{HO}+ \text{C}_4\text{F}_9\text{OCH}_3) = 1.15 \times 10^{-12} \exp(-1362/T) \text{ cm}^3 \text{ molecule}^{-1} \text{ s}^{-1}$ .  
 5220

5221  
 5222  
 5223

### Preferred Values

| Parameter                                              | Value                                | T/K     |
|--------------------------------------------------------|--------------------------------------|---------|
| $k / \text{cm}^3 \text{ molecule}^{-1} \text{ s}^{-1}$ | $1.15 \times 10^{-12} \exp(-1362/T)$ | 250-330 |
| $k / \text{cm}^3 \text{ molecule}^{-1} \text{ s}^{-1}$ | $1.19 \times 10^{-14}$               | 298     |
| <i>Reliability</i>                                     |                                      |         |
| $\Delta \log k$                                        | 0.08                                 | 298     |
| $\Delta E/R$                                           | 100                                  | 250-330 |

5224

### Comments on Preferred Values

5226

5227 Commercial samples of  $\text{C}_4\text{F}_9\text{OCH}_3$  are supplied as mixtures of the *n*- and *i*- isomers. All studies  
 5228 except that of Chen et al. (2011) did not resolve the reactivity of the individual isomers and hence report  
 5229 results for the mixture of isomers. Chen et al. (2011) were able to distinguish the two isomers in their  
 5230 relative rate study and reported separate kinetic data for each isomer;  $k(\text{HO}+n\text{-C}_4\text{F}_9\text{OCH}_3) = 1.10 \times 10^{-12}$   
 5231  $\exp(-1347/T)$  and  $k(\text{HO}+i\text{-C}_4\text{F}_9\text{OCH}_3) = 1.21 \times 10^{-12} \exp(-1377/T) \text{ cm}^3 \text{ molecule}^{-1} \text{ s}^{-1}$ . At 298 K the  
 5232 isomers have the same rate coefficient;  $1.19 \times 10^{-14} \text{ cm}^3 \text{ molecule}^{-1} \text{ s}^{-1}$ . A fit to the combined data set  
 5233 gives  $k(\text{HO}+\text{C}_4\text{F}_9\text{OCH}_3) = 1.15 \times 10^{-12} \exp(-1362/T) \text{ cm}^3 \text{ molecule}^{-1} \text{ s}^{-1}$  and is the preferred value. The  
 5234 298 K rate coefficients reported by Wallington et al. (1997), Nolan et al. (1999), Oyaro and Nielsen  
 5235 (2003), and Bravo et al. (2010) for the mixtures of *n*- and *i*-isomers used in the different studies agree,  
 5236 within the likely combined experimental uncertainties, with that measured by Chen et al. (2011). For  
 5237 reasons which are unclear, the rate coefficient reported by Cavalli et al. (1997) is approximately 40%  
 5238 lower.

5239

5240 Bravo et al. (2010) used an absolute rate technique to study the reaction over the temperature range  
 5241 288-368 K. The rate coefficients results reported by Bravo et al. (2010) are 25-100% larger than  
 5242 those from Chen et al. (2011). Tokuhashi et al. (1999) showed that the presence of reactive impurities  
 5243 can be problematic in studies of HO reactions with fluorinated ethers. Bravo et al. (2010) did not  
 5244 purify their sample and the presence of reactive impurities may explain the larger rate coefficients  
 5245 observed in their study.

5246

5247 The reaction of HO with  $\text{CH}_3\text{OC}_4\text{F}_9$  proceeds via H-abstraction from the  $\text{CH}_3$ - which then leads to the

5248 formation of the formate:

5249

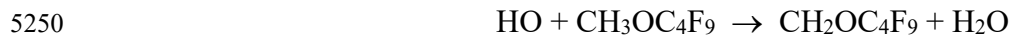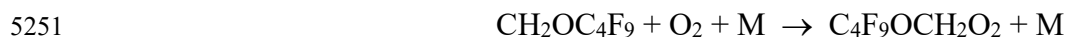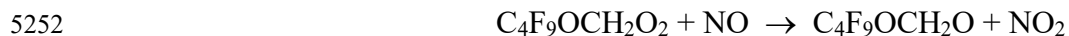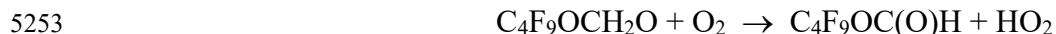

5254

5255

5256

## References

5257

5258 Atkinson, R., Baulch, D. L., Cox, R. A., Crowley, J. N., Hampson, R. F., Hynes, R. G., Jenkin, M. E.,  
5259 Rossi, M. J., and Troe, J.: *Atmos. Chem. Phys.*, 6, 3625, 2006; IUPAC Task Group on Atmospheric  
5260 Chemical Kinetic Data Evaluation, <https://iupac.aeris-data.fr/>

5261 Bravo, I., Diaz-de-Mera, Y., Aranda, A., Smith, K., Shine, K. P., and Marston, G.: *Phys. Chem. Chem.*  
5262 *Phys.*, 12, 5115, 2010.

5263 Cavalli, F., Glasius, M., Hjorth, J., Rindone, B., and Jensen, N. R.: *Atmos. Environ.*, 32, 3767, 1998.

5264 Chen, L., Uchimaru, T., Kutsuna, S., Tokuhashi, K., and Sekiya, A.: *Chem. Phys. Lett.*, 514, 207, 2011.

5265 Nolan, S., O'Sullivan, N., Wenger, J., Sidebottom, H., and Treacy, J.: in: R. Djahjhs (Ed.), *Proceedings of*  
5266 *EUROTRAC Symposium '98: Transport and Chemical Transformation in the Troposphere,*  
5267 *Garmisch-Partenkirchen, Germany, March 23-27, 1998,* WIT Press, Ashurst, Southampton, UK,  
5268 1999, pp. 1–120.

5269 Oyaró, N., and Nielsen, C. J.: *Asian Chem. Lett.*, 7, 119, 2003

5270 Tokuhashi, K., Takahashi, A., Kaise, M., Kondo, S., Sekiya, A., Yamashita, S., and Ito, H.: *Int. J. Chem.*  
5271 *Kinet.*, 31, 846, 1999.

5272 Wallington, T. J., Schneider, W. F., Sehested, J., Bilde, M., Platz, J., Nielsen, O. J., Christensen, L. K.,  
5273 Molina, M. J., Molina, L. T., and Wooldridge, P. W.: *J. Phys. Chem. A*, 101, 8264, 1997.

5274

5275

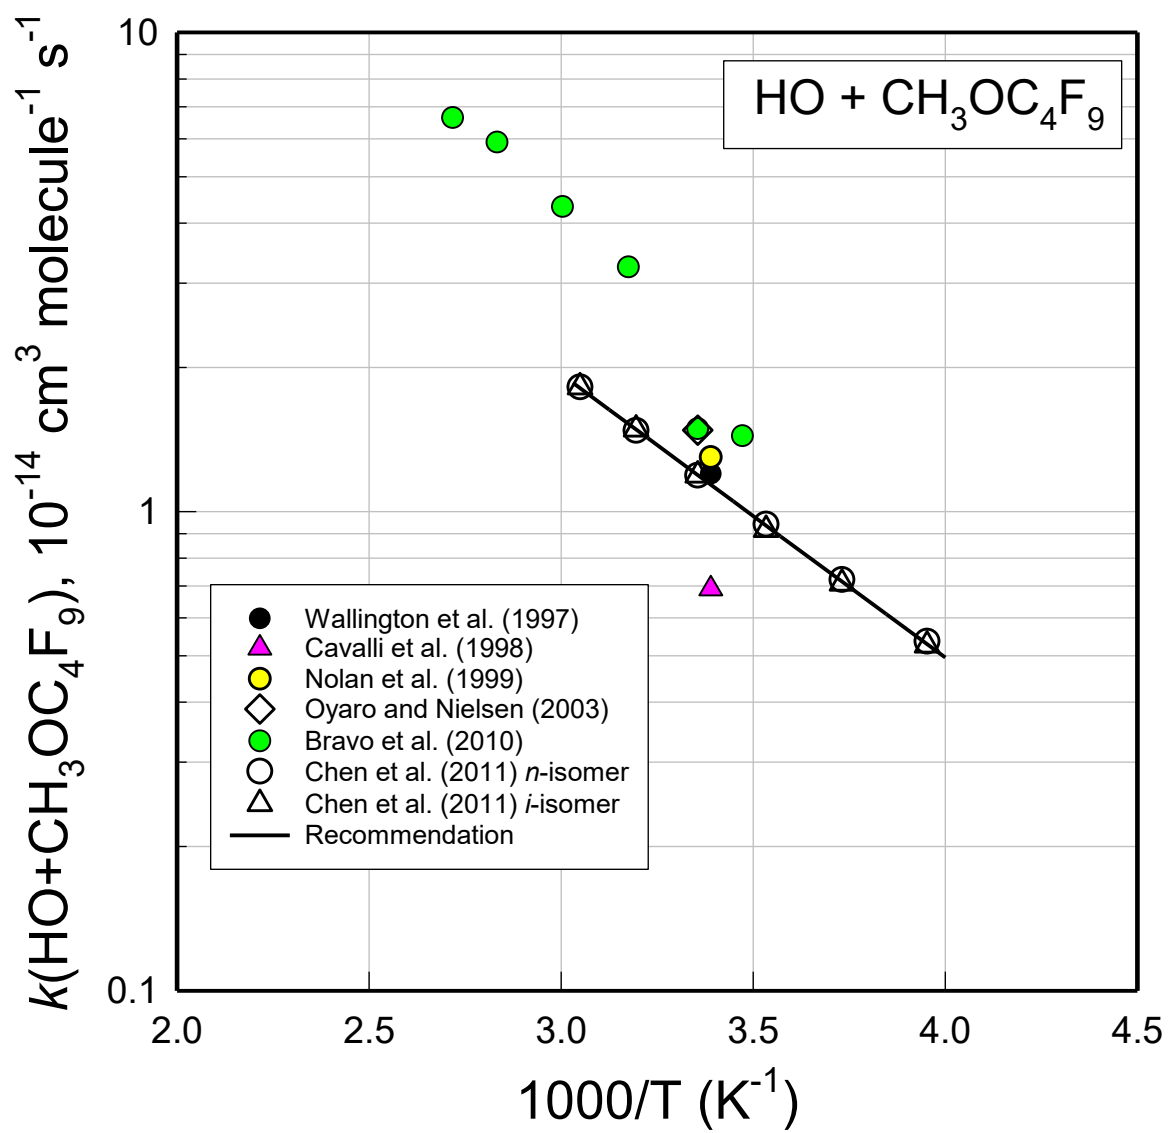

5276  
5277

5278 **oFOx148: HO + CH<sub>3</sub>OCH(CF<sub>3</sub>)<sub>2</sub>**  
 5279 Last evaluated: June 2025; Last change in preferred values: June 2023.

5280  
5281  
5282  
5283  
5284  
5285

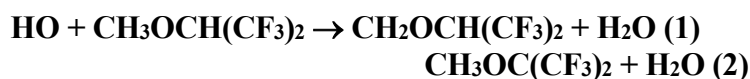

**Rate coefficient data ( $k = k_1 + k_2$ )**

| $k/\text{cm}^3 \text{ molecule}^{-1} \text{ s}^{-1}$                                                 | Temp./K        | Reference           | Technique/ Comments |
|------------------------------------------------------------------------------------------------------|----------------|---------------------|---------------------|
| <i>Absolute Rate Coefficients</i>                                                                    |                |                     |                     |
| $7.69 \times 10^{-14} \times (T/298)^{2.99} \times \exp(342/T)$<br>$(2.38 \pm 0.03) \times 10^{-13}$ | 230-370        | Orkin et al. (2017) | FP-RF (a)           |
| <i>Relative Rate Coefficients</i>                                                                    |                |                     |                     |
| $(1.40 \pm 0.28) \times 10^{-12} \exp[(-550 \pm 60/T)]$<br>$2.25 \times 10^{-13}$                    | 253-328<br>295 | Chen et al. (2005)  | RR (b)              |

5286  
5287  
5288  
5289  
5290  
5291  
5292  
5293  
5294  
5295  
5296  
5297  
5298  
5299  
5300  
5301  
5302

**Comments**

- (a) HO radicals were generated by the flash photolysis of H<sub>2</sub>O in 4 and 13.3 kPa (30 and 100 Torr) of argon diluent and monitored by resonance fluorescence at 308 nm. The sample of CH<sub>3</sub>OCH(CF<sub>3</sub>)<sub>2</sub> was purified using a preparative scale gas chromatograph before use.
- (b) HO radicals were generated by the photolysis of O<sub>3</sub> at 254 nm in the presence of water vapor in 200 Torr (267 mbar) of O<sub>2</sub> diluent. The loss of CH<sub>3</sub>OCH(CF<sub>3</sub>)<sub>2</sub> was measured relative to those of C<sub>2</sub>H<sub>6</sub> and CH<sub>2</sub>Cl<sub>2</sub>. The results obtained using the two different reference compounds were in excellent agreement. Using  $k(\text{HO} + \text{C}_2\text{H}_6) = 6.90 \times 10^{-12} \exp(-1000/T)$  and  $k(\text{HO} + \text{CH}_2\text{Cl}_2) = 1.80 \times 10^{-12} \exp(-860/T) \text{ cm}^3 \text{ molecule}^{-1} \text{ s}^{-1}$  (Atkinson et al., 2006; 2008) places the reported rate coefficient ratios on an absolute basis and fitting an Arrhenius expression to the results gives  $k(\text{HO} + \text{CH}_3\text{OCH}(\text{CF}_3)_2) = 1.22 \times 10^{-12} \exp(-508/T) \text{ cm}^3 \text{ molecule}^{-1} \text{ s}^{-1}$ .

**Preferred Values**

| Parameter                                              | Value                                                         | T/K            |
|--------------------------------------------------------|---------------------------------------------------------------|----------------|
| $k / \text{cm}^3 \text{ molecule}^{-1} \text{ s}^{-1}$ | $2.29 \times 10^{-13}$<br>$1.08 \times 10^{-12} \exp(-461/T)$ | 298<br>230-340 |
| <i>Reliability</i>                                     |                                                               |                |
| $\Delta \log k$                                        | 0.10                                                          | 298            |
| $\Delta \log E/R$                                      | $\pm 100$                                                     | 250-340        |

5303  
5304  
5305  
5306  
5307  
5308  
5309  
5310

*Comments on Preferred Values*

There is excellent agreement between the results from the relative rate study by Chen et al. (2005) and the absolute study by Orkin et al. (2017). Curvature in the Arrhenius plot is evident in the data from Orkin et al. (2017). Taking an average of the values reported by Chen et al. (2005) and Orkin et al. (2017) gives the preferred value at 298 K. A fit to the combined data set from Chen et al. (2005) and Orkin et al. (2017) below 340 K and adjusting the pre-exponential factor to match the

5311 preferred rate coefficient at 298 K gives the preferred Arrhenius expression.

5312

5313

5314

### References

5315 Atkinson, R., Baulch, D. L., Cox, R. A., Crowley, J. N., Hampson, R. F., Hynes, R. G., Jenkin, M. E.,  
5316 Rossi, M. J., and Troe, J.: Atmos. Chem. Phys., 6, 3625, 2006; IUPAC Task Group on Atmospheric  
5317 Chemical Kinetic Data Evaluation, <https://iupac.aeris-data.fr/>.

5318 Atkinson, R., Baulch, D. L., Cox, R. A., Crowley, J. N., Hampson, R. F., Hynes, R. G., Jenkin, M. E.,  
5319 Rossi, M. J., Troe, J., and Wallington, T.J.: Atmos. Chem. Phys., 8, 4141, 2008; IUPAC Task Group  
5320 on Atmospheric Chemical Kinetic Data Evaluation, <https://iupac.aeris-data.fr/>.

5321 Chen, L.; Kutsuna, S., Tokushasi, K.; Sekiya, A., Tamai, R., and Hibino, Y.: J. Phys. Chem. A, 109, 4766,  
5322 2005.

5323 Orkin, V. L., Martynova, L. E., and Kurylo, M. J.: J. Phys. Chem, 121, 5675, 2017.

5324

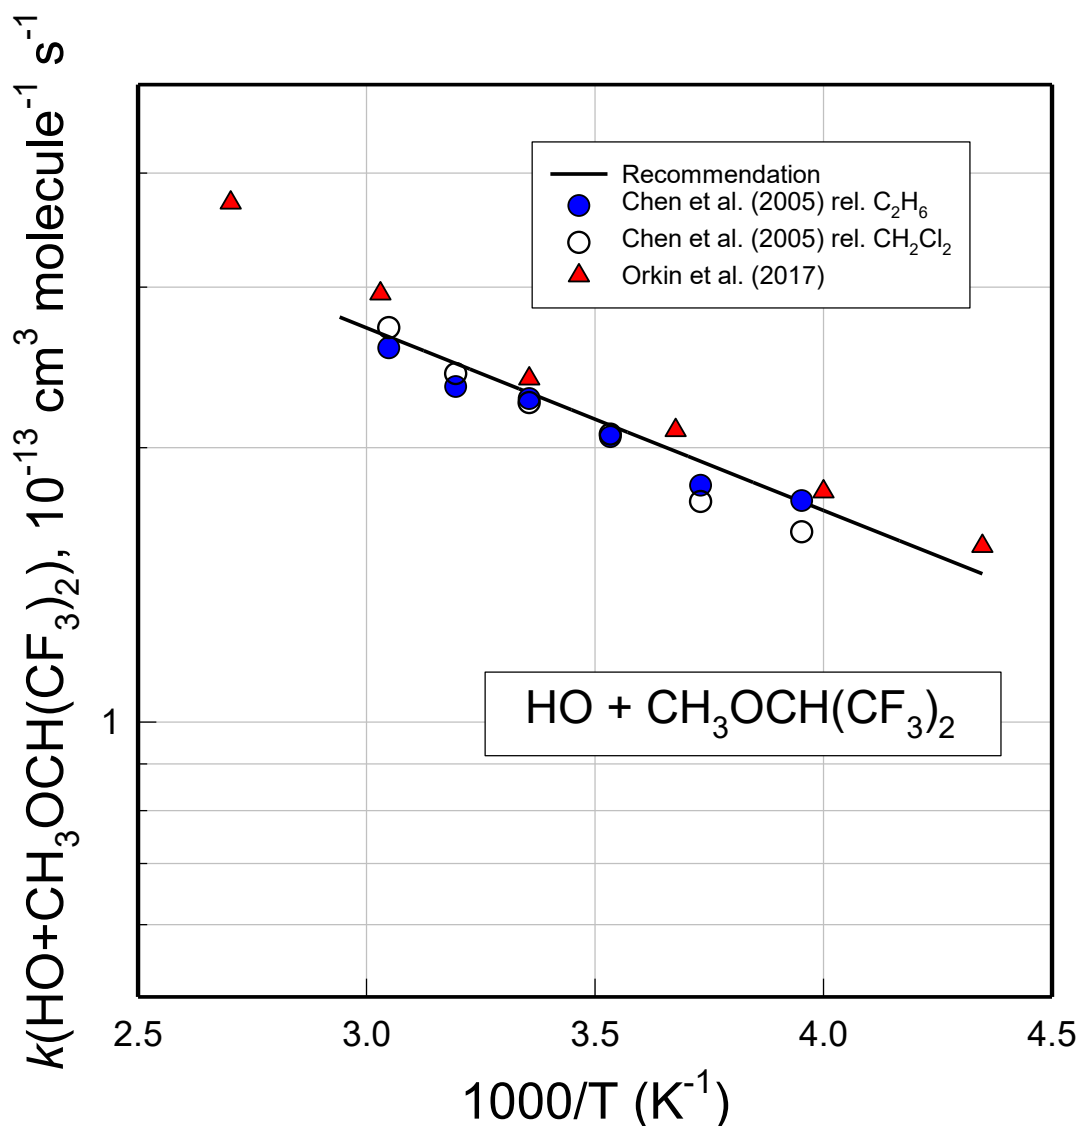

5325

5326

5327

5328  
5329  
5330  
5331  
5332  
5333  
5334  
5335

**oFOx149: HO + CH<sub>2</sub>FOCH(CF<sub>3</sub>)<sub>2</sub> (Sevoflurane)**

Last evaluated: February 2026; Last change in preferred values: February 2026.

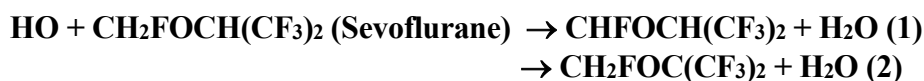

**Rate coefficient data ( $k = k_1 + k_2$ )**

| $k/\text{cm}^3 \text{ molecule}^{-1} \text{ s}^{-1}$    | Temp./K | Reference                      | Technique/<br>Comments |
|---------------------------------------------------------|---------|--------------------------------|------------------------|
| <i>Absolute Rate Coefficients</i>                       |         |                                |                        |
| $1.53 \times 10^{-12} \exp(-900/T)$                     | 299-422 | Brown et al. (1990)            | DF-RF (a)              |
| $(7.3 \pm 2.2) \times 10^{-14}$                         | 299     |                                |                        |
| $(2.7 \pm 0.5) \times 10^{-14}$                         | 298     | Langbein et al. (1999)         | PLP-UVA (b)            |
| $(9.98 \pm 3.24) \times 10^{-12} \exp[(-969 \pm 82)/T]$ | 243-298 | Sulbaek Andersen et al. (2012) | PLP-LIF (c)            |
| $(3.94 \pm 0.30) \times 10^{-14}$                       | 298     |                                |                        |
| $(1.6 \pm 0.7) \times 10^{-12} \exp[(-1065 \pm 138)/T]$ | 253-423 | Espinosa et al. (2025)         | PLP-LIF (d)            |
| $(4.25 \pm 0.86) \times 10^{-14}$                       | 298     |                                |                        |
| <i>Relative Rate Coefficients</i>                       |         |                                |                        |
| $(2.98 \pm 0.18) \times 10^{-14}$                       | 296     | Sulbaek Andersen et al. (2012) | RR (e)                 |
| $(3.31 \pm 0.22) \times 10^{-14}$                       | 296     |                                |                        |

5336  
5337  
5338  
5339  
5340  
5341  
5342  
5343  
5344  
5345  
5346  
5347  
5348  
5349  
5350  
5351  
5352  
5353  
5354  
5355  
5356  
5357  
5358  
5359

**Comments**

- (a) HO radicals were generated by the reaction of H atoms with NO<sub>2</sub> in 1-8 – 6.3 Torr of helium diluent.
- (b) HO radicals were produced by 248 nm photolysis of HNO<sub>3</sub> and monitored by laser long-path absorption at 308.42 nm. Experiments were performed in N<sub>2</sub> diluent, the total pressure was not specified, but judging from the conditions specified for the HO detection limit, it was probably 50 mbar.
- (c) HO radicals were generated by the 248 nm photolysis of O<sub>3</sub> to give O(<sup>1</sup>D) atoms which react with CH<sub>4</sub>. GC analysis of the sevoflurane sample indicated a purity of >99.98%. There was no discernable effect of total pressure over the range 111 - 300 Torr of argon diluent.
- (d) HO radicals were generated by the 248 nm photolysis of either H<sub>2</sub>O<sub>2</sub> or HNO<sub>3</sub> in 70-80 Torr of helium diluent and monitored by laser induced fluorescence.
- (e) HO radicals were generated by the photolysis of CH<sub>3</sub>ONO in the presence of NO in 700 Torr of air diluent. The loss of CH<sub>2</sub>FOCH(CF<sub>3</sub>)<sub>2</sub> was inferred from the formation of its oxidation product FC(O)OCH(CF<sub>3</sub>)<sub>2</sub> measured using FTIR spectroscopy. C<sub>2</sub>H<sub>2</sub> and C<sub>2</sub>H<sub>4</sub> were used as reference compounds and rate coefficient ratios  $k(\text{HO} + \text{CH}_2\text{FOCH}(\text{CF}_3)_2)/k(\text{HO} + \text{C}_2\text{H}_2) = (0.0399 \pm 0.0024)$  and  $k(\text{HO} + \text{CH}_2\text{FOCH}(\text{CF}_3)_2)/k(\text{HO} + \text{C}_2\text{H}_4) = (4.22 \pm 0.28) \times 10^{-3}$  were reported. Using  $k(\text{HO} + \text{C}_2\text{H}_2) = 7.47 \times 10^{-13}$  and  $k(\text{HO} + \text{C}_2\text{H}_4) = 7.85 \times 10^{-12}$  (Atkinson et al., 2006) gives  $k(\text{HO} + \text{CH}_2\text{FOCH}(\text{CF}_3)_2) = (2.98 \pm 0.18) \times 10^{-14}$  and  $(3.31 \pm 0.22) \times 10^{-14} \text{ cm}^3 \text{ molecule}^{-1} \text{ s}^{-1}$ .

5360  
5361

### Preferred Values

| Parameter                                              | Value                                | T/K     |
|--------------------------------------------------------|--------------------------------------|---------|
| $k / \text{cm}^3 \text{ molecule}^{-1} \text{ s}^{-1}$ | $4.10 \times 10^{-14}$               | 298     |
|                                                        | $1.24 \times 10^{-12} \exp(-1017/T)$ | 230-440 |
| <i>Reliability</i>                                     |                                      |         |
| $\Delta \log k$                                        | 0.10                                 | 298     |
| $\Delta \log E/R$                                      | $\pm 200$                            | 230-440 |

5362

#### Comments on Preferred Values

5363 The rate coefficient reported by Brown et al. (1990) at 299 K is approximately a factor of 2-3  
5364 higher than those reported by Langbein et al. (1999), Sulbaek Andersen et al. (2012), and Espinosa et  
5365 al (2025). As noted elsewhere (e.g., Calvert et al. 2008), for several of the compounds investigated by  
5366 Brown et al. (1990) substantially higher rate coefficients were reported than in subsequent studies. It  
5367 seems likely that the presence of reactive impurities was a complicating factor in the study by  
5368 Brown et al. (1990). The result from Langbein et al. (1999) at 298 K is approximately 30% lower  
5369 than reported by Sulbaek Andersen et al. (2012) and Espinosa et al (2025) but consistent within the  
5370 extremes of the likely uncertainties in the studies. The rate coefficients reported by Sulbaek Andersen  
5371 et al. (2012) and Espinosa et al (2025) are in excellent agreement. The recommended rate coefficient  
5372 at 298 K is the average of the absolute rate determinations by Sulbaek Andersen et al. (2012) and  
5373 Espinosa et al (2025). The recommended temperature dependence is the average from Sulbaek  
5374 Andersen et al. (2012) and Espinosa et al (2025), the pre-exponential factor A was chosen to return the  
5375 recommended rate coefficient at 298 K. Results from the relative rate measurements by Sulbaek  
5376 Andersen et al. (2012) at ambient temperature are consistent with the recommended data.

5377

5378

5379

5380

5381

### References

- 5382 Atkinson, R., Baulch, D. L., Cox, R. A., Crowley, J. N., Hampson, R. F., Hynes, R. G., Jenkin, M.  
5383 E., Rossi, M. J., and Troe, J.: Atmos. Chem. Phys., 6, 3625, 2006; IUPAC Task Group on  
5384 Atmospheric Chemical Kinetic Data Evaluation, <https://iupac.aeris-data.fr/>  
5385 Brown, A. C.; Canosa-Mas, C. E.; Parr, A. D.; and Wayne, R. P.: Atmos. Environ., 24A, 2499,  
5386 1990.  
5387 Espinosa, S., Martínez, F., Antinolo, M., Nielsen, O. J., and Jiménez, E.: Environ. Sci.: Proc.  
5388 Impacts, 27, 2410, 2025.  
5389 Langbein, T., Sonntag, H., Trapp, D., Hoffmann, A., Malms, W., Röth, E.-P., Mörs, V., and  
5390 Zellner, R.: British J. Anaest., 82, 66, 1999.  
5391 Sulbaek Andersen, M. P., Nielsen, O. J., Karpichev, B., Wallington, T. J., and Sander, S. P.: J.  
5392 Phys. Chem. A, 116, 5806, 2012.

5393

5394

$k(\text{HO} + \text{CH}_2\text{FOCH}(\text{CF}_3)_2), 10^{-14} \text{ cm}^3 \text{ molecule}^{-1} \text{ s}^{-1}$

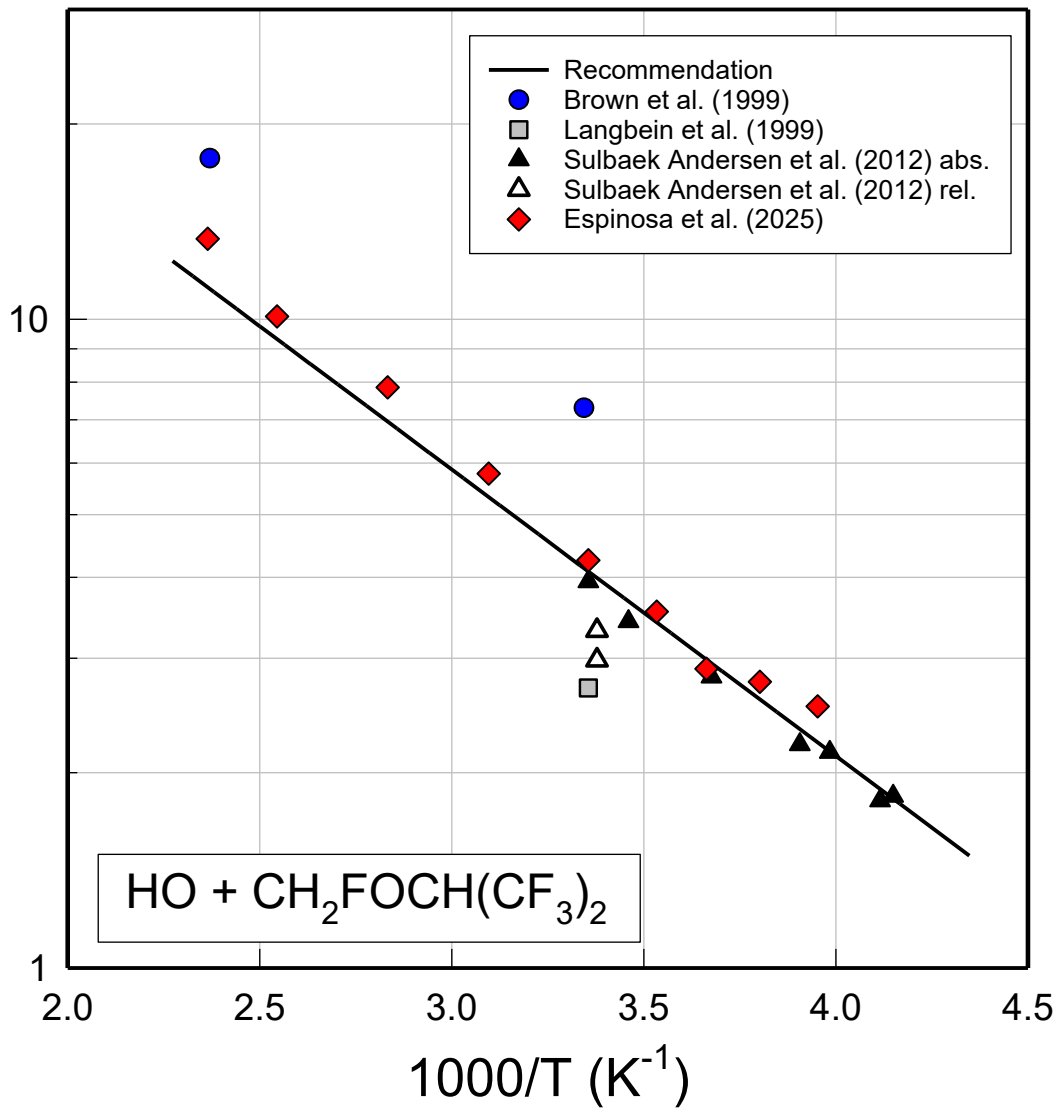

5395  
5396

5397  
5398  
5399  
5400  
5401  
5402  
5403  
5404

**oFOx150: HO + CHF<sub>2</sub>OCHF<sub>2</sub>CF<sub>3</sub> (Desflurane)**

Last evaluated June 2025; Last change in preferred values: September 2019.

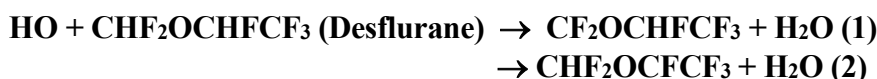

**Rate coefficient data ( $k = k_1 + k_2$ )**

| $k/\text{cm}^3 \text{ molecule}^{-1} \text{ s}^{-1}$     | Temp./K | Reference                      | Technique/<br>Comments |
|----------------------------------------------------------|---------|--------------------------------|------------------------|
| <i>Absolute Rate Coefficients</i>                        |         |                                |                        |
| $(4.4 \pm 0.8) \times 10^{-15}$                          | 298     | Langbein et al. (1999)         | PLP-UVA (a)            |
| $(7.05 \pm 1.80) \times 10^{-13} \exp[(-1551 \pm 72)/T]$ | 239-296 | Sulbaek Andersen et al. (2012) | PLP-LIF (b)            |
| $(3.73 \pm 0.08) \times 10^{-15}$                        | 296     |                                |                        |
| <i>Relative Rate Coefficients</i>                        |         |                                |                        |
| $(6.37 \pm 0.23) \times 10^{-15}$                        | 298     | Orayo et al. (2005)            | RR (c)                 |
| $(5.40 \pm 0.17) \times 10^{-15}$                        | 298     |                                |                        |

5405  
5406  
5407  
5408  
5409  
5410  
5411  
5412  
5413  
5414  
5415  
5416  
5417  
5418  
5419  
5420  
5421  
5422  
5423  
5424

**Comments**

- (a) HO radicals were produced by 248 nm photolysis of HNO<sub>3</sub> and monitored by laser long-path absorption at 308.42 nm. Experiments were performed in N<sub>2</sub> diluent, the total pressure was not specified, but judging from the conditions specified for the HO detection limit, it was probably 50 mbar.
- (b) HO radicals were generated by the 248 nm photolysis of O<sub>3</sub> to give O(<sup>1</sup>D) atoms which react with CH<sub>4</sub>. GC analysis of the desflurane sample indicated a purity of >99.998%. Experiments were conducted in 111 Torr of argon diluent.
- (c) HO radicals were produced by the photolysis of O<sub>3</sub> at 254 nm in the presence of H<sub>2</sub> in 1013 mbar of air diluent. The loss of CHF<sub>2</sub>OCHF<sub>2</sub>CF<sub>3</sub> was monitored relative to those of CH<sub>3</sub>CCl<sub>3</sub> and CHF<sub>2</sub>CH<sub>2</sub>F by GC/MS. Rate coefficient ratios of  $k(\text{HO} + \text{CHF}_2\text{OCHF}_2\text{CF}_3)/k(\text{HO} + \text{CH}_3\text{CCl}_3) = 0.67 \pm 0.024$  and  $k(\text{HO} + \text{CHF}_2\text{OCHF}_2\text{CF}_3)/k(\text{HO} + \text{CHF}_2\text{CH}_2\text{F}) = 0.36 \pm 0.04$  were reported. Using  $k(\text{HO} + \text{CH}_3\text{CCl}_3) = 9.5 \times 10^{-15}$  and  $k(\text{HO} + \text{CHF}_2\text{CH}_2\text{F}) = 1.5 \times 10^{-14} \text{ cm}^3 \text{ molecule}^{-1} \text{ s}^{-1}$  at 298 K (Atkinson et al., 2006, 2008) gives  $k(\text{HO} + \text{CHF}_2\text{OCHF}_2\text{CF}_3) = (6.37 \pm 0.23) \times 10^{-15}$  and  $(5.40 \pm 0.17) \times 10^{-15} \text{ cm}^3 \text{ molecule}^{-1} \text{ s}^{-1}$ .

**Preferred Values**

| Parameter                                            | Value                                                          | T/K            |
|------------------------------------------------------|----------------------------------------------------------------|----------------|
| $k/\text{cm}^3 \text{ molecule}^{-1} \text{ s}^{-1}$ | $4.08 \times 10^{-15}$<br>$7.43 \times 10^{-13} \exp(-1551/T)$ | 298<br>230-300 |
| <i>Reliability</i>                                   |                                                                |                |
| $\Delta \log k$                                      | 0.10                                                           | 298            |
| $\Delta \log E/R$                                    | $\pm 200$                                                      | 230-300        |

5425  
5426

5428

5429

5430

5431

5432

5433

5434

5435

5436

5437

5438

5439

5440

5441

5442

5443

5444

5445

5446

5447

5448

5449

5450

The rate coefficients measured at 298 K in the absolute rate studies by Langbein et al. (1999) and Sulbaek Andersen et al. (2012) are in good agreement and are averaged to provide the preferred value. The preferred Arrhenius expression is based on the temperature dependence reported by Sulbaek Andersen et al. (2012) with the pre-exponential factor adjusted to return the preferred value at 298 K. The results from the relative rate study by Orayo et al. (2005) are consistent within the uncertainties with the preferred values.

### References

- Atkinson, R., Baulch, D. L., Cox, R. A., Crowley, J. N., Hampson, R. F., Hynes, R. G., Jenkin, M. E., Rossi, M. J., and Troe, J.: *Atmos. Chem. Phys.*, 6, 3625, 2006; IUPAC Task Group on Atmospheric Chemical Kinetic Data Evaluation, <https://iupac.aeris-data.fr/>.
- Atkinson, R., Baulch, D. L., Cox, R. A., Crowley, J. N., Hampson, R. F., Hynes, R. G., Jenkin, M. E., Rossi, M. J., Troe, J., and Wallington, T. J.: *Atmos. Chem. Phys.*, 9, 4141, 2008; IUPAC Task Group on Atmospheric Chemical Kinetic Data Evaluation, <https://iupac.aeris-data.fr/>.
- Langbein, T., Sonntag, H., Trapp, D., Hoffmann, A., Malms, W., Röth, E.-P., Mörs, V., and Zellner, R.: *British J. Anaest.*, 82, 66, 1999.
- Oyaro, N., Sellevåg, S. R., and Nielsen, C. J.: *J. Phys. Chem. A*, 109, 337, 2005.
- Sulbaek Andersen, M. P., Nielsen, O. J., Karpichev, B., Wallington, T. J., and Sander, S. P.: *J. Phys. Chem. A*, 116, 5806, 2012.

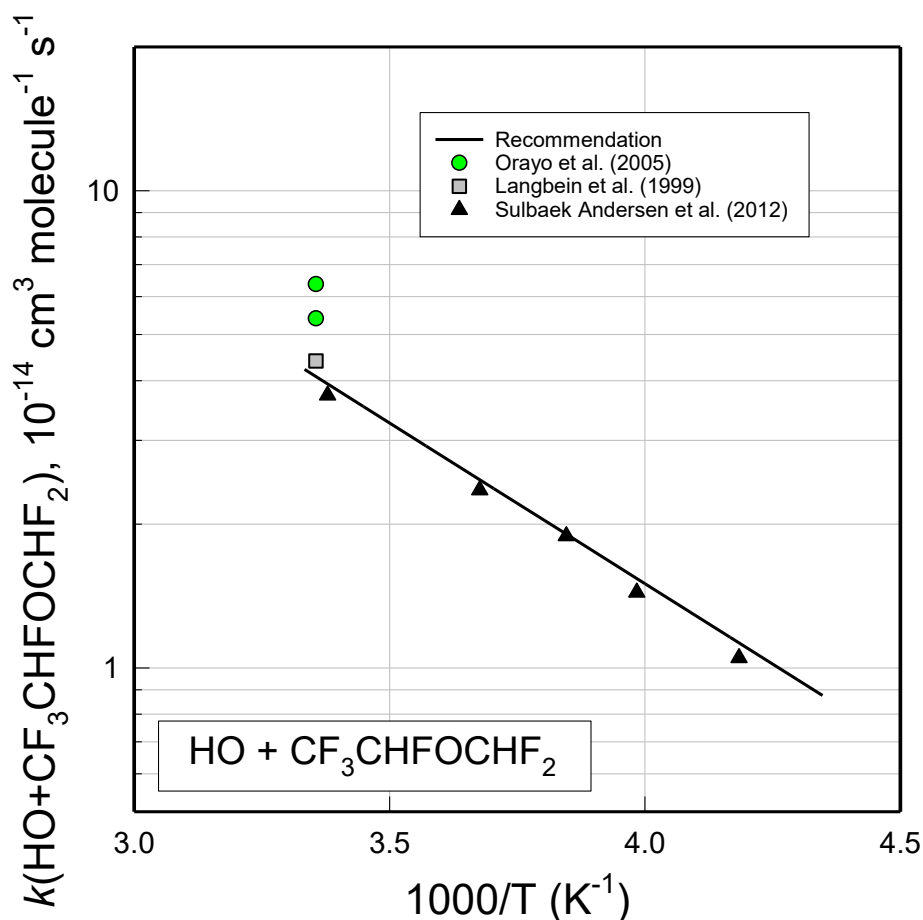

5451

5452

5455 **HO + CF<sub>3</sub>OCF=CF<sub>2</sub> → products**

5456 **Rate coefficient data**

| <i>k</i> /cm <sup>3</sup> molecule <sup>-1</sup> s <sup>-1</sup> | Temp./K | Reference               | Technique/ Comments |
|------------------------------------------------------------------|---------|-------------------------|---------------------|
| <i>Absolute Rate Coefficients</i>                                |         |                         |                     |
| 6.41 × 10 <sup>-11</sup> exp(-868/ <i>T</i> )                    | 253-348 | Li et al. (2000)        | DF-RF (a)           |
| (3.58 ± 0.42) × 10 <sup>-12</sup>                                | 298     |                         |                     |
| 1.01 × 10 <sup>-12</sup> exp(320/ <i>T</i> )                     | 250-430 | Tokuhashi et al. (2000) | LFP-RF (b)          |
| (2.98 ± 0.03) × 10 <sup>-12</sup>                                | 298     |                         |                     |
| <i>Relative Rate Coefficients</i>                                |         |                         |                     |
| (2.16 ± 0.19) × 10 <sup>-12</sup>                                | 296     | Mashino et al. (2000)   | RR (c)              |
| (2.28 ± 0.16) × 10 <sup>-12</sup>                                |         |                         |                     |

5460 **Comments**

- 5461
- 5462
- 5463 (a) HO radicals were produced by the reaction of F atoms with H<sub>2</sub>O or by the reaction of H atoms with  
 5464 NO<sub>2</sub> in 1 Torr of He diluent at 298 K.
- 5465 (b) HO radicals were produced by the pulsed xenon flash lamp photolysis of H<sub>2</sub>O, or pulsed ArF excimer  
 5466 laser photolysis of N<sub>2</sub>O to produce O(<sup>1</sup>D) atoms which were then reacted with either H<sub>2</sub>O or CH<sub>4</sub> to  
 5467 give HO radicals, or pulsed laser photolysis of H<sub>2</sub>O<sub>2</sub>. Experiments were conducted in 5-200 Torr of  
 5468 helium, or argon, diluent. There was no discernible effect of pressure or diluent gas over the range  
 5469 studied. Results from experiments using four different sources of HO radicals were  
 5470 indistinguishable.
- 5471 (c) Photolysis of CH<sub>3</sub>ONO in 700 Torr (933 mbar) of air diluent was used to generate HO radicals. The  
 5472 loss of CF<sub>3</sub>OCF=CF<sub>2</sub> was measured relative to those of C<sub>2</sub>H<sub>2</sub> and C<sub>2</sub>H<sub>4</sub> and used to measure the rate  
 5473 coefficient ratios  $k(\text{CF}_3\text{OCF}=\text{CF}_2)/k(\text{C}_2\text{H}_2) = 2.89 \pm 0.25$  and  $k(\text{CF}_3\text{OCF}=\text{CF}_2)/k(\text{C}_2\text{H}_4) = 0.29 \pm 0.02$ .  
 5474 Using  $k(\text{HO} + \text{C}_2\text{H}_2) = 7.47 \times 10^{-13}$  and  $k(\text{HO} + \text{C}_2\text{H}_4) = 7.85 \times 10^{-12}$  (Atkinson et al., 2006) gives  
 5475  $k(\text{HO} + \text{CF}_3\text{OCF}=\text{CF}_2) = (2.16 \pm 0.19) \times 10^{-12}$  and  $(2.28 \pm 0.16) \times 10^{-12}$  cm<sup>3</sup> molecule<sup>-1</sup> s<sup>-1</sup>.

5476 **Preferred Values**

| Parameter                                                        | Value                                        | <i>T</i> /K |
|------------------------------------------------------------------|----------------------------------------------|-------------|
| <i>k</i> /cm <sup>3</sup> molecule <sup>-1</sup> s <sup>-1</sup> | 2.96 × 10 <sup>-12</sup>                     | 298         |
|                                                                  | 1.01 × 10 <sup>-12</sup> exp(320/ <i>T</i> ) | 250-430     |
| <i>Reliability</i>                                               |                                              |             |
| Δ log <i>k</i>                                                   | 0.10                                         | 298         |
| Δ E/R                                                            | ±100                                         | 250-430     |

5479 **Comments on Preferred Values**

5480 While the rate coefficients measured at 298 K in the absolute rate studies by Li et al. (2000) and  
 5481 Tokuhashi et al. (2000) differ by only approximately 20%, the temperature dependencies measured in  
 5482 the two studies are strikingly different. It is well established that the mechanism of the reaction of HO  
 5483 radicals with alkenes is addition to the >C=C< bond and the temperature dependence reported by Li et  
 5484  
 5485

5486 al. (2000) is not physically plausible. The results from the relative rate study by Mashino et al. (2000)  
5487 at 296 K are approximately 25% lower than the rate coefficient reported by Tokuhashi et al. (2000) at  
5488 298 K. Such a difference lies at the extreme end of the likely combined experimental uncertainties  
5489 from the two studies. The preferred expression is taken from Tokuhashi et al. (2000) and gives  $k(\text{HO} +$   
5490  $\text{CF}_3\text{OCF}=\text{CF}_2) = 2.96 \times 10^{-12} \text{ cm}^3 \text{ molecule}^{-1} \text{ s}^{-1}$  at 298 K.

5491  
5492  
5493  
5494  
5495  
5496  
5497  
5498  
5499  
5500  
5501  
5502  
5503

### References

- Atkinson, R., Baulch, D. L., Cox, R. A., Crowley, J. N., Hampson, R. F., Hynes, R. G., Jenkin, M. E., Rossi, M. J., and Troe, J.: *Atmos. Chem. Phys.*, 6, 3625, 2006; IUPAC Task Group on Atmospheric Chemical Kinetic Data Evaluation, <https://iupac.aeris-data.fr/>
- Li, Z., Tao, Z., Naik, V., Good, D. A., Hansen, J. C., Jeong, G.-R., Francisco, J. S., Jain, A. K., and Wuebbles, D. J., *J. Geophys. Res.*, 105, 4019, 2000.
- Mashino, M., Ninomiya, Y., Kawasaki, M., Wallington, T. J., and Hurley, M. D.: *J. Phys. Chem. A* 104, 7255, 2000.
- Tokuhashi, K., Takahashi, A., Kaise, M., Kondo, S., Sekiya, A., and Fujimoto, E.: *Chem. Phys. Lett.*, 325, 189, 2000.

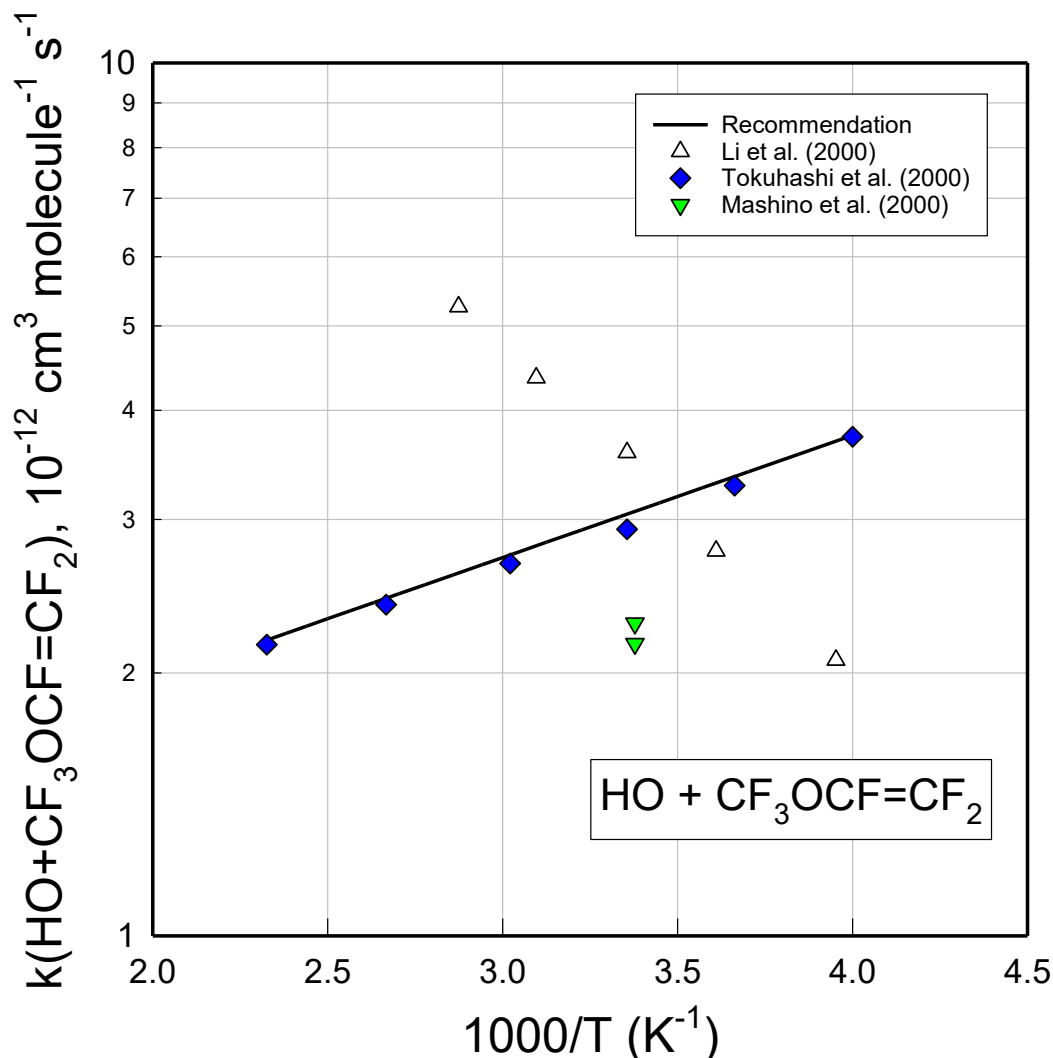

5504  
5505

5506  
 5507 **oFOx134: HO + C<sub>2</sub>F<sub>5</sub>OCF=CF<sub>2</sub>**  
 5508 Last evaluated: June 2025; Last change in preferred values: June 2019.

5509 **HO + C<sub>2</sub>F<sub>5</sub>OCF=CF<sub>2</sub> → products**

5510 **Rate coefficient data**

| <i>k</i> /cm <sup>3</sup> molecule <sup>-1</sup> s <sup>-1</sup> | Temp./K | Reference                 | Technique/ Comments |
|------------------------------------------------------------------|---------|---------------------------|---------------------|
| <i>Absolute Rate Coefficients</i>                                |         |                           |                     |
| $6.0 \times 10^{-13} \exp(480 \pm 38/T)$                         | 207-300 | Srinivasulu et al. (2018) | PLP-LIF (a)         |
| $(3.0 \pm 0.3) \times 10^{-12}$                                  | 298     |                           |                     |
| <i>Relative Rate Coefficients</i>                                |         |                           |                     |
| $(3.08 \pm 0.07) \times 10^{-12}$                                | 298     | Srinivasulu et al. (2018) | RR (b)              |
| $(2.82 \pm 0.05) \times 10^{-12}$                                | 298     | Bunkan et al. (2018)      | RR (c)              |

5514 **Comments**

- 5515  
 5516  
 5517 (a) HO radicals were produced by the photolysis of H<sub>2</sub>O<sub>2</sub> or HNO<sub>3</sub> at 248 nm in 50 or 100 Torr of N<sub>2</sub>  
 5518 diluent. The pseudo first order loss of HO radicals was measured in the presence of an excess of  
 5519 C<sub>2</sub>F<sub>5</sub>OCF=CF<sub>2</sub>.  
 5520 (b) HO radicals were produced by the photolysis of O<sub>3</sub> in the presence of H<sub>2</sub> in 1 atmosphere of air  
 5521 diluent. The loss of C<sub>2</sub>F<sub>5</sub>OCF=CF<sub>2</sub> was measured relative to that of C<sub>3</sub>H<sub>8</sub> and a rate coefficient ratio  
 5522 of  $k(\text{C}_2\text{F}_5\text{OCF}=\text{CF}_2)/k(\text{C}_3\text{H}_8) = 2.802 \pm 0.061$  was reported. Using  $k(\text{HO} + \text{C}_3\text{H}_8) = 1.1 \times 10^{-12}$   
 5523 (Atkinson et al., 2006) gives  $k(\text{C}_2\text{F}_5\text{OCF}=\text{CF}_2) = (3.08 \pm 0.07) \times 10^{-12} \text{ cm}^3 \text{ molecule}^{-1} \text{ s}^{-1}$ .  
 5524 (c) Photolysis of CH<sub>3</sub>ON0.60 in 1 bar of air diluent was used to generate HO radicals. The loss of  
 5525 C<sub>2</sub>F<sub>5</sub>OCF=CF<sub>2</sub> was measured relative to that of C<sub>2</sub>H<sub>4</sub> and used to measure the rate coefficient ratio  
 5526  $k(\text{C}_2\text{F}_5\text{OCF}=\text{CF}_2)/k(\text{C}_2\text{H}_4) = 0.361 \pm 0.006$ . Using  $k(\text{HO} + \text{C}_2\text{H}_4) = 7.8 \times 10^{-12}$  (Atkinson et al., 2006)  
 5527 gives  $k(\text{HO} + \text{C}_2\text{F}_5\text{OCF}=\text{CF}_2) = (2.82 \pm 0.05) \times 10^{-12} \text{ cm}^3 \text{ molecule}^{-1} \text{ s}^{-1}$ .  
 5528  
 5529

5530 **Preferred Values**

| Parameter                                                        | Value                             | T/K     |
|------------------------------------------------------------------|-----------------------------------|---------|
| <i>k</i> /cm <sup>3</sup> molecule <sup>-1</sup> s <sup>-1</sup> | $3.0 \times 10^{-12}$             | 298     |
|                                                                  | $6.0 \times 10^{-13} \exp(480/T)$ | 200-300 |
| <i>Reliability</i>                                               |                                   |         |
| $\Delta \log k$                                                  | 0.10                              | 298     |
| $\Delta E/R$                                                     | ±100                              | 200-300 |

5531 *Comments on Preferred Values*

5532  
 5533  
 5534 There is excellent agreement in the results from the absolute and relative rate studies by Srinivasula et  
 5535 al. (2018) and Bunkan et al. (2018) at 298-300 K. The preferred Arrhenius expression is taken from  
 5536 Srinivasula et al. (2018) which gives  $k(\text{HO} + \text{C}_2\text{F}_5\text{OCF}=\text{CF}_2) = 3.0 \times 10^{-12} \text{ cm}^3 \text{ molecule}^{-1} \text{ s}^{-1}$  at 298 K  
 5537  
 5538  
 5539

5540  
5541  
5542  
5543  
5544  
5545  
5546  
5547  
5548  
5549  
5550

## References

- Atkinson, R., Baulch, D. L., Cox, R. A., Crowley, J. N., Hampson, R. F., Hynes, R. G., Jenkin, M. E., Rossi, M. J., and Troe, J.: Atmos. Chem. Phys., 6, 3625, 2006; IUPAC Task Group on Atmospheric Chemical Kinetic Data Evaluation, <https://iupac.aeris-data.fr/>
- Bunkan, A. J. C., Srinivasulu, G., Amedro, D., Wallington, T. J., and Crowley, J. N.: Phys. Chem. Chem. Phys., 20, 11306, 2018.
- Srinivasulu, G., Bunkan, A. J. C., Amedro, D., and Crowley, J. N. : Phys. Chem. Chem. Phys., 20, 3761, 2018.

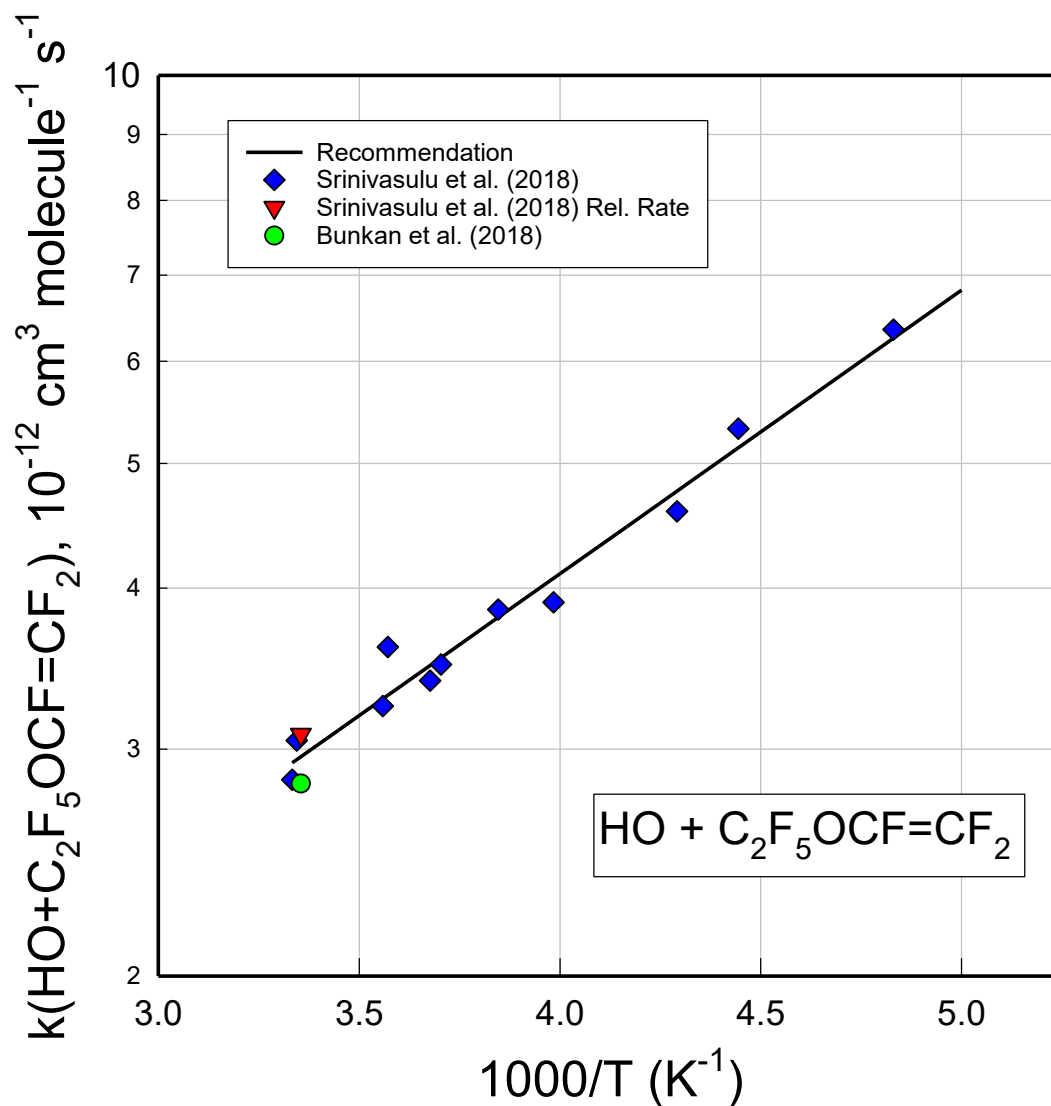

5551  
5552

5553

**oFOx160: CF<sub>3</sub>C(O)O<sub>2</sub> + HO<sub>2</sub>**

5554

Last evaluated: June 2025; Last change in preferred values: November 2022.

5555

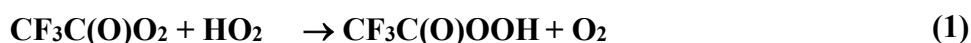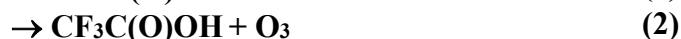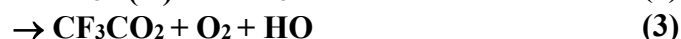

5556

5557

**Rate coefficient data ( $k = k_1 + k_2 + k_3$ )**

5558

| $k / \text{cm}^3 \text{ molecule}^{-1} \text{ s}^{-1}$ | Temp./K     | Reference                     | Technique/<br>Comments |
|--------------------------------------------------------|-------------|-------------------------------|------------------------|
| Branching ratios                                       |             |                               |                        |
| $k_1/k = 0.09 \pm 0.04$                                | $296 \pm 2$ | Sulbaek Andersen et al., 2004 | S-FTIR (a)             |
| $k_2/k = 0.38 \pm 0.04$                                |             |                               |                        |
| $k_3/k = 0.56 \pm 0.05$                                |             |                               |                        |

5559

5560

**Comments**

5561

5562

- (a) Experiments were carried out in a 140 L static reactor with reactants and products analysed by FTIR. CF<sub>3</sub>C(O)O<sub>2</sub> and HO<sub>2</sub> radicals were generated by the broad-band photolysis of Cl<sub>2</sub> in the presence of CF<sub>3</sub>CHO and H<sub>2</sub> in air or O<sub>2</sub>. The initial relative production rate of HO<sub>2</sub> to CF<sub>3</sub>C(O)O<sub>2</sub> was varied from 0 to ~13; at the high end of the scale all CF<sub>3</sub>C(O)O<sub>2</sub> radicals are expected to react with HO<sub>2</sub>. The loss of CF<sub>3</sub>CHO and the formation of CF<sub>3</sub>C(O)OOH, CF<sub>3</sub>C(O)OH and COF<sub>2</sub> were used to derive branching ratios for  $k_1$ ,  $k_2$  and  $k_3$  respectively. O<sub>3</sub>, (co-produced with CF<sub>3</sub>C(O)OH) was also observed and its yield was indistinguishable from that of CF<sub>3</sub>C(O)OH.

5563

5564

5565

5566

5567

5568

5569

5570

5571

**Preferred Values**

5572

| Parameter                                              | Value      | T/K |
|--------------------------------------------------------|------------|-----|
| $k / \text{cm}^3 \text{ molecule}^{-1} \text{ s}^{-1}$ | 2e-11      | 298 |
| $k_1/k$                                                | 0.09       | 296 |
| $k_2/k$                                                | 0.38       | 296 |
| $k_3/k$                                                | 0.56       | 296 |
| <i>Reliability</i>                                     |            |     |
| $\Delta \log k$                                        | $\pm 0.3$  | 298 |
| $\Delta \log(k_1/k)$                                   | $\pm 0.2$  | 298 |
| $\Delta \log(k_2/k)$                                   | $\pm 0.15$ | 298 |
| $\Delta \log(k_3/k)$                                   | $\pm 0.15$ | 298 |

5573

5574

*Comments on Preferred Values*

5575

5576

5577

5578

5579

5580

5581

5582

5583

There is very little experimental data on the reaction between CF<sub>3</sub>C(O)O<sub>2</sub> and HO<sub>2</sub> and the rate coefficient has not been studied. The relative importance of the three reaction pathways has been determined (at room temperature only) by Sulbaek Andersen et al., 2004, who showed that the formation of trifluoro acetic acid (CF<sub>3</sub>C(O)OH) with a branching ratio of  $0.38 \pm 0.04$  is preferred over the peroxide (or peroxyacid CF<sub>3</sub>C(O)OOH) with a branching ratio  $0.09 \pm 0.04$ . The most important pathway at room temperature is however formation of CF<sub>3</sub>CO<sub>2</sub> + O<sub>2</sub> + HO with a branching ratio of  $0.56 \pm 0.05$ . The initially formed CF<sub>3</sub>CO<sub>2</sub> product decomposes to CF<sub>3</sub> + CO<sub>2</sub>. By comparison with the larger experimental dataset on the analogous reaction of the non-fluorinated peroxy radical

5584 CH<sub>3</sub>C(O)O<sub>2</sub> (see IUPAC Data-Sheet HO<sub>x</sub>\_VOC54) we may expect that the acid forming pathway ( $k_2$ )  
5585 will gain in relative importance at the cost of  $k_1$  and  $k_3$  as the temperature decreases, but this requires  
5586 experimental / theoretical confirmation.

5587 In the absence of a direct measurement of  $k$ , we list the value for the non-fluorinated analogue  
5588 CH<sub>3</sub>C(O)O<sub>2</sub>. This value and its temperature dependence need to be determined experimentally.

5589

5590

### References

5591

5592 Sulbaek Andersen, M. P., Stenby, C., Nielsen, O. J., Hurley, M. D., Ball, J. C., Wallington, T. J.,  
5593 Martin, J. W., Ellis, D. A., and Mabury, S. A.: J. Phys. Chem. A, 108, 63252004.

5594

5595

5598

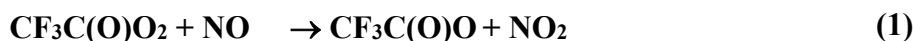

5599

5600

5601

### Rate coefficient data

| $k / \text{cm}^3 \text{ molecule}^{-1} \text{ s}^{-1}$ | Temp./K     | Reference               | Technique/<br>Comments |
|--------------------------------------------------------|-------------|-------------------------|------------------------|
| Absolute rate coefficients                             |             |                         |                        |
| $> 9 \times 10^{-12}$                                  | $296 \pm 2$ | Wallington et al., 1994 | PR-UV (a)              |
| $4.0 \times 10^{-12} \exp(563/T)$                      |             | Maricq et al., 1994     | FP-IR (b)              |
| $2.8 \pm 0.6 \times 10^{-11}$                          | 220-324     |                         |                        |

5602

5603

5604

### Comments

- 5605 (a) CF<sub>3</sub>C(O)O<sub>2</sub> radicals were generated in the pulsed radiolysis of SF<sub>6</sub>/CF<sub>3</sub>CHO/O<sub>2</sub> mixtures. The  
 5606 conditions were chosen so that the fate of the initially formed CF<sub>3</sub>CO radicals was reaction with  
 5607 O<sub>2</sub> to form CF<sub>3</sub>C(O)O<sub>2</sub>. By adding NO to the mixture (0-1 mbar), the rate coefficient for  
 5608 CF<sub>3</sub>C(O)O<sub>2</sub> + NO was derived by monitoring the rate of formation of the NO<sub>2</sub> product via  
 5609 absorption spectroscopy at 400 nm.
- 5610 (b) CF<sub>3</sub>C(O)O<sub>2</sub> radicals were generated in the 351 nm flash photolysis of either Cl<sub>2</sub> or F<sub>2</sub> in the  
 5611 presence of CF<sub>3</sub>CHO/N<sub>2</sub>/O<sub>2</sub>/NO mixtures. The rate coefficient for CF<sub>3</sub>C(O)O<sub>2</sub> + NO was derived  
 5612 by monitoring the rate of loss of NO and formation of NO<sub>2</sub> via infra-red absorption spectroscopy.

5613

5614

5615

### Preferred Values

| Parameter                                              | Value                             | T/K     |
|--------------------------------------------------------|-----------------------------------|---------|
| $k / \text{cm}^3 \text{ molecule}^{-1} \text{ s}^{-1}$ | $2.8 \times 10^{-11}$             | 298     |
|                                                        | $4.0 \times 10^{-12} \exp(560/T)$ | 220-340 |
| <i>Reliability</i>                                     |                                   |         |
| $\Delta \log k$                                        | $\pm 0.2$                         | 298     |
| $\Delta \log (E/R)$                                    | $\pm 200$                         | 220-340 |

5616

5617

5618

### Comments on Preferred Values

5619 There are two kinetic studies on the reaction between CF<sub>3</sub>C(O)O<sub>2</sub> and NO which (at the  
 5620 common temperature) are not in good agreement despite the use of similar methods. The rate  
 5621 coefficient was derived by analysis of NO<sub>2</sub> formation (Wallington et al, 1994; Maricq et al., 1996) or  
 5622 NO loss (Maricq et al., 1996). In both cases, the analyses were complicated by reactions of NO<sub>x</sub> with  
 5623 other radicals in the system.

5624 Wallington et al. (1994) derived a room-temperature rate coefficient of  $1.1 \times 10^{-11} \text{ cm}^3 \text{ molecule}^{-1} \text{ s}^{-1}$   
 5625 from a plot of the NO<sub>2</sub> formation rate-constant versus NO. However a large positive intercept and a  
 5626 NO<sub>2</sub> yield of 173 % indicated that other peroxy radicals (e.g. CF<sub>3</sub>O<sub>2</sub>) also converted NO to NO<sub>2</sub> and  
 5627 the authors preferred to report a lower limit of  $k > 9.9 \times 10^{-12} \text{ cm}^3 \text{ molecule}^{-1} \text{ s}^{-1}$ . Maricq et al. (1996)  
 5628 found that the time profiles of both NO and NO<sub>x</sub> were impacted by reactions of NO with CF<sub>3</sub>O<sub>2</sub> (to  
 5629 form NO<sub>2</sub>) and with CF<sub>3</sub>CO<sub>2</sub> and CF<sub>3</sub>O (to remove NO) thus complicating the kinetic analysis. They  
 5630 found a much larger (factor 2.5) rate coefficient at room temperature than Wallington et al.

5631 As the result of Maricq et al. (1996) is consistent with the lower limit of Wallington et al. and is

5632 similar to the large rate coefficient for reaction of the non-fluorinated analogue ( $\text{CH}_3\text{C}(\text{O})\text{O}_2$ ) with  
5633  $\text{NO}$ , we adopt this as our preferred value, albeit with expanded uncertainty. Maricq et al (1996)  
5634 observed a negative temperature dependence, which is consistent with the kinetic data on  $\text{CH}_3\text{C}(\text{O})\text{O}_2$   
5635 with  $\text{NO}$  and we adopt their measurement of the temperature dependence of  $k$ .

### References

5639 Maricq, M. M., Szente, J. J., Khitrov, G. A., and Francisco, J. S.: *J. Phys. Chem.*, 100, 4514, 1996.  
5640 Wallington, T. J., Hurley, M. D., Nielsen, O. J., and Sehested, J.: *J. Phys. Chem.*, 98, 5686, 1994.

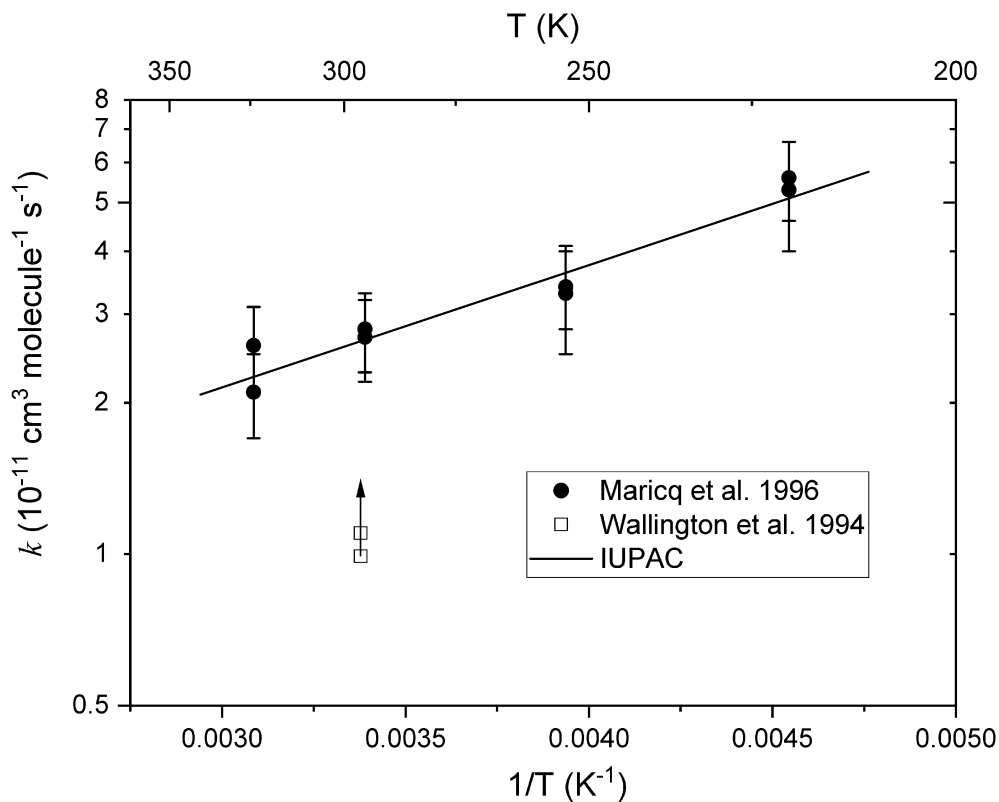

Rate coefficients for  $\text{CF}_3\text{CO}_3 + \text{NO}$ . The arrow indicates that the (lower) value of Wallington et al. is a lower limit. The upper value is their actual measurement (see text for details).

5643 **oFOx162: CF<sub>3</sub>C(O)O<sub>2</sub> + NO<sub>2</sub> + M**  
5644 Last evaluated: June 2025; Last change in preferred values: November 2022.

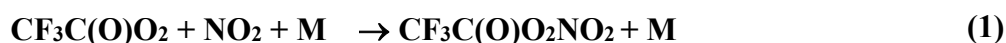

5646  
5647  
5648

### Rate coefficient data

| $k / \text{cm}^3 \text{ molecule}^{-1} \text{ s}^{-1}$            | Temp./K     | Reference               | Technique/<br>Comments |
|-------------------------------------------------------------------|-------------|-------------------------|------------------------|
| Absolute rate coefficients<br>( $6.6 \pm 1.3$ ) $\times 10^{-12}$ | $296 \pm 2$ | Wallington et al., 1994 | PR-UV (a)              |

5649  
5650  
5651  
5652  
5653  
5654  
5655  
5656

### Comments

(a) CF<sub>3</sub>C(O)O<sub>2</sub> radicals were generated in the pulsed radiolysis of SF<sub>6</sub>/CF<sub>3</sub>CHO/O<sub>2</sub> mixtures. The conditions were chosen so that the initially formed CF<sub>3</sub>CO radicals were converted to CF<sub>3</sub>C(O)O<sub>2</sub> in < 2 μs. The rate coefficient for CF<sub>3</sub>C(O)O<sub>2</sub> + NO<sub>2</sub> was derived by monitoring the rate of loss of NO<sub>2</sub> via absorption spectroscopy at 400 nm.

### Preferred Values

| Parameter                                              | Value                 | T/K |
|--------------------------------------------------------|-----------------------|-----|
| $k / \text{cm}^3 \text{ molecule}^{-1} \text{ s}^{-1}$ | $6.6 \times 10^{-12}$ | 296 |
| Reliability<br>$\Delta \log k$                         | $\pm 0.3$             | 296 |

5657  
5658  
5659  
5660  
5661  
5662  
5663  
5664  
5665  
5666  
5667  
5668  
5669  
5670  
5671  
5672  
5673  
5674  
5675  
5676

### Comments on Preferred Values

The pulsed radiolysis experiments of Wallington et al. (1994) represent the only kinetic study of the reaction between CF<sub>3</sub>C(O)O<sub>2</sub> and NO<sub>2</sub> which was limited to room temperature and a total pressure of 1 bar SF<sub>6</sub>. Although pseudo first-order kinetics appeared to be followed, the NO<sub>2</sub> concentration was significantly depleted during the reaction and corrections ( $\leq 12\%$ ) were applied to take this into account. In addition,  $\approx 15\%$  of the initially formed CF<sub>3</sub>C(O) radicals decomposed to CF<sub>3</sub> (+ CO) with subsequent formation of CF<sub>3</sub>O<sub>2</sub> which may also react with NO<sub>2</sub> thus complicating the analysis. The uncertainty listed in the preferred value of  $k$  reflect the fact that there is only one study of the reaction and the potential complications involving the presence of peroxy radicals other than CF<sub>3</sub>C(O)O<sub>2</sub>.

In line with other termolecular reactions between organic peroxy radicals NO<sub>2</sub>, the reaction is likely to be in the high-pressure limit in the experiments of Wallington et al. (1994) at one bar SF<sub>6</sub>.

### References

Wallington, T. J., Sehested, J., and Nielsen, O. J.: Chem. Phys. Lett., 226, 563, 1994.

5677 **oFOx163: CF<sub>3</sub>C(O)O<sub>2</sub>NO<sub>2</sub> + M**  
 5678 Last evaluated: June 2025; Last change in preferred values: November 2022.

5679

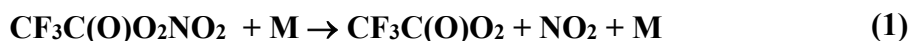

5680

5681

5682

### Rate coefficient data

| $k / \text{s}^{-1}$                    | Temp./K | Reference               | Technique/<br>Comments |
|----------------------------------------|---------|-------------------------|------------------------|
| Absolute rate coefficients             |         |                         |                        |
| $1.75 \times 10^{14} \exp(-12600/T)^a$ | 285-303 | Wallington et al., 1994 | P-IR (a)               |
| $6.16 \times 10^{16} \exp(-14500/T)^b$ | 314-321 | Zabel et al., 1994      | P-IR (b)               |
| $1.94 \times 10^{17} \exp(-14800/T)^c$ | 315-319 |                         |                        |
| $6.0 \times 10^{16} \exp(-14325/T)^d$  | 314-321 |                         |                        |

5683 <sup>a</sup>Expression derived by fitting to data listed at 933 mbar, <sup>b</sup> Expression derived by fitting to data listed at 8  
 5684 mbar, <sup>c</sup>Expression derived by fitting to data listed at 30 mbar, <sup>d</sup>Value reported at 1000 mbar.

5685

5686

5687

### Comments

- 5688 (a) CF<sub>3</sub>C(O)O<sub>2</sub> radicals were generated in the broad-band (300-400 nm) photolysis of Cl<sub>2</sub> in the  
 5689 presence of CF<sub>3</sub>CHO, O<sub>2</sub> and N<sub>2</sub> at a total pressure of 100 or 700 Torr (133 or 933 mbar) and  
 5690 converted to CF<sub>3</sub>C(O)O<sub>2</sub>NO<sub>2</sub> via addition of NO<sub>2</sub>. When the NO<sub>2</sub> was completely depleted, NO  
 5691 was added and the first-order rate of loss of CF<sub>3</sub>C(O)O<sub>2</sub>NO<sub>2</sub> monitored via IR-absorption features.  
 5692 Corrections (9-21%) were applied to the rate constants to take into account reformation of  
 5693 CF<sub>3</sub>C(O)O<sub>2</sub>NO<sub>2</sub> through recombination of the CF<sub>3</sub>C(O)O<sub>2</sub> and NO<sub>2</sub> products.
- 5694 (b) CF<sub>3</sub>C(O)O<sub>2</sub> radicals were generated in the broad-band ( $\lambda > 300$  nm) photolysis of Cl<sub>2</sub> in the  
 5695 presence of CF<sub>3</sub>CHO, O<sub>2</sub> and N<sub>2</sub> at a total pressure of 100 or 700 Torr (133 or 933 mbar) and  
 5696 converted to CF<sub>3</sub>C(O)O<sub>2</sub>NO<sub>2</sub> via addition of NO<sub>2</sub>. When the NO<sub>2</sub> was completely depleted, NO  
 5697 was added and the first-order rate of loss of CF<sub>3</sub>C(O)O<sub>2</sub>NO<sub>2</sub> monitored via IR-absorption features.  
 5698 Corrections (10-25 %) were applied to the rate constants to take into account reformation of  
 5699 CF<sub>3</sub>C(O)O<sub>2</sub>NO<sub>2</sub> through recombination of the CF<sub>3</sub>C(O)O<sub>2</sub> and NO<sub>2</sub> products.

5700

5701

### Preferred Values

| Parameter                                                       | Value                                | T/K       |
|-----------------------------------------------------------------|--------------------------------------|-----------|
| $k$ (s <sup>-1</sup> ) (1bar)                                   | $7.95 \times 10^{-5}$                | 298       |
| $k_0$ (cm <sup>3</sup> molecule <sup>-1</sup> s <sup>-1</sup> ) | $5.0 \times 10^{-20} \exp(-12350/T)$ | 290 – 330 |
| $k_\infty$ (s <sup>-1</sup> )                                   | $1.1 \times 10^{17} \exp(-14440/T)$  | 290 – 330 |
| $F_c$                                                           | 0.2                                  | 290 – 330 |
| <i>Reliability</i>                                              |                                      |           |
| $\Delta \log k$                                                 | $\pm 0.3$                            | 296       |

5702

### Comments on Preferred Values

5704

5705 The two studies of the thermal decomposition of CF<sub>3</sub>C(O)O<sub>2</sub>NO<sub>2</sub> cover a limited ranges of  
 5706 pressures and temperatures. While the experiments of Zabel et al. (1994) show a clear pressure  
 5707 dependence (8-1000 mbar) at temperatures between ~ 314 and 320 K, the experiments of Wallington  
 5708 et al. (1994) at 303 K are independent of pressure between 100 and 933 mbar. Both studies indicate a  
 5709 strong dependence on temperature at all pressures (see Figure 1). In order to parameterise this

5710 termolecular reaction, rate coefficients at temperatures of exactly 303 K, 314 K and 320 K were  
5711 calculated for each pressure studied using temperature dependent expressions (see parameters in the  
5712 table above) derived by fitting to the individual datasets at single pressures. The results are shown in  
5713 Figure 2. The solid lines are Troe-type fits to the data in which the temperature dependence of  $k_0$  and  
5714  $k_\infty$  were taken from Zabel et al. (1994) as was the broadening factor,  $F_c$ , which they calculated using  
5715 vibrational frequencies of  $\text{CF}_3\text{C}(\text{O})\text{O}_2\text{NO}_2$ . The pre-exponential factor for  $k_0$  was adjusted to best fit  
5716 all datasets.

5717 While the parameterisation adequately reproduces the experimental data, extrapolation beyond the  
5718 temperature range of the two studies should be performed with caution.

5720 The following text-line combines the preferred values for the high and low pressure limiting rate  
5721 coefficients to generate a single, cut-and-paste expression for calculation of  $k$ :

5722  
5723 
$$=((5e-2*\exp(-12350/T))*M*(1.1e17*\exp(-14440/T)))/((5e-2*\exp(-12350/T))*M+(1.1e17*\exp(-$$
  
5724  $14440/T))*10^{(\log10(0.2)/(1+(\log10((5e-2*\exp(-12350/T))*M/(1.1e17*\exp(-14440/T)))/(0.75-$   
5725  $1.27*\log10(0.2)))^2))$

5726  
5727 The molecular density,  $M = 7.243 \times 10^{21} P(\text{bar})/T(\text{K})$

5728

5729

5730

### References

5731 Wallington, T. J., Hurley, M. D., Nielsen, O. J., and Sehested, J.: J. Phys. Chem., 98, 5686, 1994.

5732 Zabel, F., Kirchner, F., and Becker, K. H.: Int. J. Chem. Kinet., 26, 827, 1994.

5733

5734

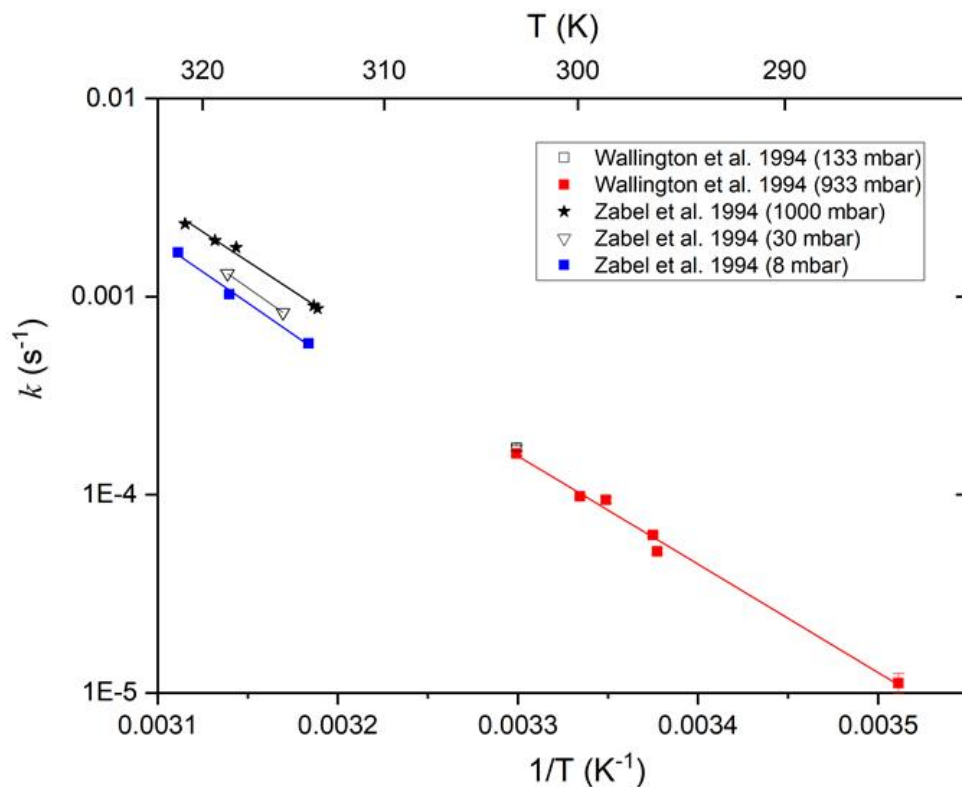

5736 Measurements of the rate coefficient ( $k$ ) for the thermal dissociation of  $\text{CF}_3\text{C}(\text{O})\text{O}_2\text{NO}_2$  at various temperatures and  
 5737 pressures. The solid lines are fits to the raw data at each pressure.  
 5738  
 5739  
 5740

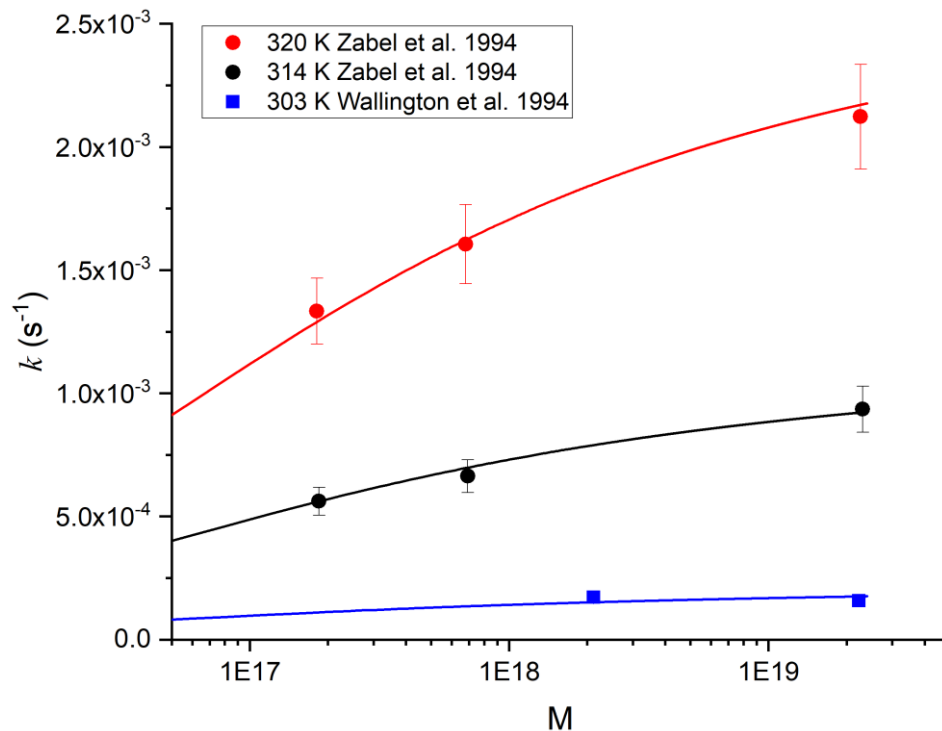

5741 Pressure dependence of  $k(T)$ . Data points at single temperatures were calculated from fits to the raw data as shown in  
 5742 The solid lines are the IUPAC preferred values based on a fall off parameterisation.  
 5743  
 5744  
 5745

5746 **PF5: CHF<sub>2</sub>CHO + hv**  
5747 Last evaluated: June 2025; last change in preferred values: June 2010.  
5748

5749  
5750 **CHF<sub>2</sub>CHO + hv → products**

5751 **Primary photochemical transitions**

| Reaction                  |                                       |     |
|---------------------------|---------------------------------------|-----|
| CHF <sub>2</sub> CHO + hv | → CHF <sub>2</sub> + HCO              | (1) |
|                           | → CHF <sub>2</sub> CO + H             | (2) |
|                           | → CH <sub>2</sub> F <sub>2</sub> + CO | (3) |

5754  
5755  
5756  
5757  
5758

**Absorption cross-section data**

| Wavelength range/nm | References             | Comments |
|---------------------|------------------------|----------|
| 190-400             | Sellevåg et al. (2005) | (a)      |

5759  
5760  
5761

**Quantum yield data**

| Measurement            | Wavelength/nm | References            | Comments |
|------------------------|---------------|-----------------------|----------|
| $\Phi = 0.30 \pm 0.05$ | 295-400       | Sellevåg et al., 2005 | (b)      |

5762  
5763  
5764

**Comments**

5765  
5766  
5767  
5768  
5769  
5770  
5771  
5772  
5773  
5774  
5775  
5776

- (a) Absolute absorption cross-sections were measured using a diode array spectrometer at 298 K. The UV spectrum of difluoroacetaldehyde shows a broad band, centered at 310 nm and extending out to approximately 355 nm. Values of  $\sigma$  were given at 1 nm intervals.
- (b) Photolysis of CHF<sub>2</sub>CHO in pure dry air in the presence of an inert tracer (SF<sub>6</sub>) added to monitor leakage from the chamber and an OH radical tracer (di-*n*-butyl ether) in the ~200 m<sup>3</sup> EUPHORE chamber facility under natural sunlight conditions. The measured loss rate of CHF<sub>2</sub>CHO during a ~5 hr period around solar noon was corrected for loss via leakage from the chamber and reaction with OH radicals to yield  $J_{\text{obs}} = (2.91 \pm 0.09) \times 10^{-5} \text{ s}^{-1}$ . This was compared to the maximum photolysis rate of  $9.8 \times 10^{-5} \text{ s}^{-1}$  calculated using a unit quantum yield for photodissociation, the measured actinic flux within the chamber, and the measured UV absorption spectrum. Taking a ratio of  $J_{\text{obs}}/J_{\text{calc}} = 2.9 \times 10^{-5}/9.8 \times 10^{-5}$  gives the effective photolysis quantum yield from wavelengths relevant to the troposphere of  $0.30 \pm 0.05$ .

5777  
5778  
5779  
5780

Preferred Values

Absorption cross-sections of CHF<sub>2</sub>CHO at 298 K

| $\lambda/\text{nm}$ | $10^{20} \sigma/\text{cm}^2$ | $\lambda/\text{nm}$ | $10^{20} \sigma/\text{cm}^2$ |
|---------------------|------------------------------|---------------------|------------------------------|
| 190                 | 0.27                         | 300                 | 4.34                         |
| 195                 | 0.20                         | 305                 | 4.49                         |
| 200                 | 0.12                         | 310                 | 4.53                         |
| 205                 | 0.08                         | 315                 | 4.07                         |
| 210                 | 0.06                         | 320                 | 4.22                         |
| 215                 | 0.05                         | 325                 | 3.37                         |
| 220                 | 0.05                         | 330                 | 2.92                         |
| 225                 | 0.06                         | 335                 | 2.07                         |
| 230                 | 0.06                         | 340                 | 1.11                         |
| 235                 | 0.07                         | 345                 | 0.97                         |
| 240                 | 0.11                         | 350                 | 0.55                         |
| 245                 | 0.17                         | 355                 | 0.09                         |
| 250                 | 0.28                         | 360                 | 0.04                         |
| 255                 | 0.44                         | 365                 | 0.01                         |
| 260                 | 0.68                         | 370                 | 0.01                         |
| 265                 | 1.01                         | 375                 | 0.02                         |
| 270                 | 1.40                         | 380                 | 0.01                         |
| 275                 | 1.87                         | 385                 | 0.01                         |
| 280                 | 2.43                         | 390                 | 0.01                         |
| 285                 | 2.95                         | 395                 | 0.01                         |
| 290                 | 3.54                         | 400                 | 0.00                         |
| 295                 | 3.97                         |                     |                              |

5781  
5782  
5783  
5784  
5785  
5786  
5787  
5788

Quantum Yields of CHF<sub>2</sub>CHO

$\Phi_1 = 0.30$  at 295- 360 nm

Reliability

$\Delta\Phi_1 = \pm 0.10$

Comments on Preferred Values

The preferred values for the cross-sections and quantum yield are taken from the study by Sellevåg et al. (2005). The photolysis of CHF<sub>2</sub>CHO, presumably in air diluent (although this was not specified), at 310 nm was investigated by Sellevåg et al. (2005) and the formation of COF<sub>2</sub> and CO products was reported. There was no observable formation of CH<sub>2</sub>F<sub>2</sub> consistent with the photolysis occurring via channel (1) to give CHF<sub>2</sub> and HCO radicals.

Calvert et al. (2010) assumed a wavelength independent quantum yield of 0.30 and estimated a photolysis lifetime for CHF<sub>2</sub>CHO of 6 hours for overhead sun at 40°N latitude at 500 m altitude with an ozone column of 350 DU.

5798  
5799

References

5800  
5801  
5802  
5803  
5804  
5805  
5806  
5807

Calvert, J. G., Mellouki, A., Orlando, J. J., Pilling, M. J., and Wallington T. J.: The Mechanisms of Atmospheric Oxidation of the Oxygenates, Oxford University Press, New York, NY, in press, 2010.

Sellevåg, S. R., Stenstrom, Y., Helgaker, T., and Nielsen, C. J.: J. Phys. Chem. A, 109, 3652, 2005.

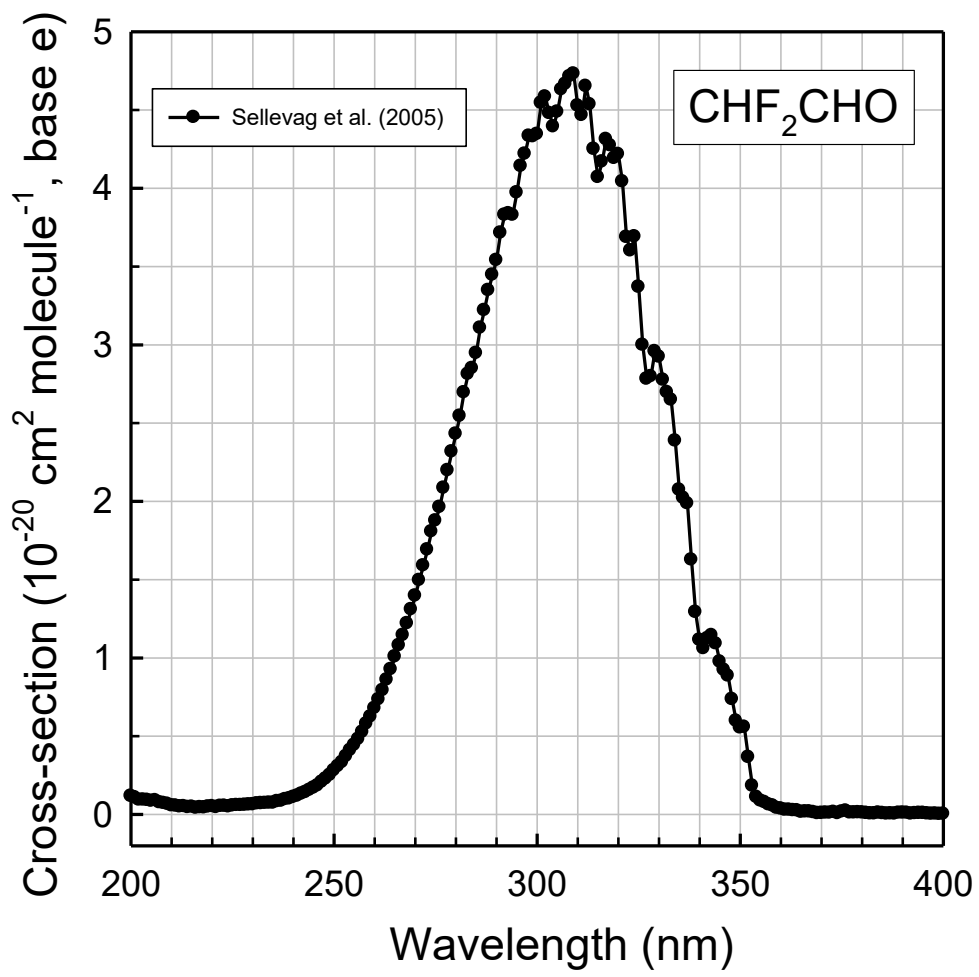

5808  
5809  
5810

5811 **PF6: C<sub>2</sub>F<sub>5</sub>CHO + hv**  
 5812 Last evaluated: June 2025; last change in preferred values: June 2014.  
 5813

5814 **C<sub>2</sub>F<sub>5</sub>CHO + hv → products**

5815 **Primary photochemical transitions**  
 5816  
 5817  
 5818

| Reaction                               |                                        |     |
|----------------------------------------|----------------------------------------|-----|
| C <sub>2</sub> F <sub>5</sub> CHO + hv | → C <sub>2</sub> F <sub>5</sub> + HCO  | (1) |
|                                        | → C <sub>2</sub> F <sub>5</sub> CO + H | (2) |
|                                        | → C <sub>2</sub> F <sub>5</sub> H + CO | (3) |

5819 **Absorption cross-section data**  
 5820  
 5821

| Wavelength range/nm | References                    | Comments |
|---------------------|-------------------------------|----------|
| 265-334             | Borkowski and Ausloss, (1962) | (a)      |
| 319                 | Pritchard et al. (1962)       | (b)      |
| 185-500             | Hashikawa et al. (2004)       | (c)      |
| 230-400             | Chiappero et al. (2006)       | (d)      |
| 230-376             | Antiñolo et al. (2014)        | (e)      |

5822 **Quantum yield data**  
 5823  
 5824

| Measurement                | Wavelength/nm | References              | Comments |
|----------------------------|---------------|-------------------------|----------|
| Φ <sub>1</sub> = 0.38±0.08 | 254           | Chiappero et al. (2006) | (f)      |
| Φ <sub>3</sub> = 0.43±0.08 | 254           | Chiappero et al. (2006) | (f)      |
| Φ <sub>1</sub> = 0.30±0.02 | 308           | Antiñolo et al. (2014)  | (g)      |

5825 **Comments**  
 5826  
 5827

- 5828 (a) Absolute absorption cross-sections at 334, 313, 280.4, and 265.2 nm were measured using a UV spectrometer with  
 5829 the sample at 305 K.  
 5830 (b) An absolute absorption cross-section at 319 nm was measured using a UV spectrometer  
 5831 (c) Absolute absorption cross-sections were measured using a diode array spectrometer at 298 K. The UV spectrum of  
 5832 C<sub>2</sub>F<sub>5</sub>CHO shows a broad band, centered at 310 nm and extending out to approximately 360 nm. Values of σ were  
 5833 given at 1 nm intervals.  
 5834 (d) Absolute absorption cross-sections were measured using a diode array spectrometer at 269-297 K. The UV spectrum  
 5835 of C<sub>2</sub>F<sub>5</sub>CHO shows a broad band, centered at 310 nm and extending out to approximately 360 nm. Values of σ were  
 5836 given at 1 nm intervals. There was no discernible effect of temperature over the range 248-297 K on the UV  
 5837 spectrum, however for reasons which are unclear the UV spectra at 308 K and 323 K reported in the supporting  
 5838 information are approximately 10% more intense than that at 298 K.  
 5839 (e) Absolute absorption cross-sections were measured using a 0.5-m spectrograph with a coupled-charge device (CCD)  
 5840 detector with 0.5–9.8 Torr of C<sub>2</sub>F<sub>5</sub>CHO. The temperature range specified in the text of the paper is 269 – 298 K, but

5841 data in the supporting information cover the range 269 – 323 K. The spectrum had a peak at  $308.13 \pm 0.76$  nm.  
 5842 Values of  $\sigma$  were given at 1 nm intervals.  
 5843 (f) Photolysis quantum yield measured using perfluoroacetic anhydride as a chemical actinometer. Mixtures of 0.5-5.5  
 5844 mbar of  $C_2F_5CHO$  and 20-70 mbar of NO (added as radical scavenger) were irradiated using a low-pressure ozone  
 5845 free Hg lamp and the rate of loss of  $C_2F_5CHO$  was compared to that of perfluoroacetic anhydride in similar  
 5846 experiments. The formation of  $C_2F_5NO$  and  $C_2F_5H$  were measured by IR spectroscopy and used to derive quantum  
 5847 yields for processes (1) and (3).  
 5848 (g) Photolysis quantum yield measured using acetaldehyde as a chemical actinometer with pulsed laser photolysis of  
 5849  $C_2F_5CHO$  at 308 nm in 75 – 760 Torr (100 – 1013 mbar) of air at 298 K. The quantum yield at  $\lambda=308$  nm was  
 5850 pressure dependent, ranging from  $(0.94 \pm 0.28)$  at 75 Torr to  $(0.30 \pm 0.02)$  at 760 Torr. The pressure dependence is  
 5851 characterized by the Stern–Volmer expression with a Stern–Volmer constant of  $(1.22 \pm 0.52) \times 10^{-19} \text{ cm}^3 \text{ molecule}^{-1}$ .  
 5852 FTIR spectroscopy was used to identify the products following photolysis of  $C_2F_5CHO$  in air. From the observed  
 5853 product distribution, it was concluded that photolysis at 308 nm occurs predominantly, if not exclusively, via channel  
 5854 (1) to give  $C_2F_5 + HCO$  radicals.  
 5855

### 5856 Preferred Values

#### 5857 Absorption cross-sections of $C_2F_5CHO$ at 298 K

| $\lambda/\text{nm}$ | $10^{20} \sigma/\text{cm}^2$ | $\lambda/\text{nm}$ | $10^{20} \sigma/\text{cm}^2$ |
|---------------------|------------------------------|---------------------|------------------------------|
| 230                 | 0.15                         | 305                 | 5.64                         |
| 235                 | 0.15                         | 310                 | 5.78                         |
| 240                 | 0.21                         | 315                 | 5.38                         |
| 245                 | 0.29                         | 320                 | 5.36                         |
| 250                 | 0.40                         | 325                 | 4.47                         |
| 255                 | 0.60                         | 330                 | 3.64                         |
| 260                 | 0.89                         | 335                 | 3.16                         |
| 265                 | 1.26                         | 340                 | 2.01                         |
| 270                 | 1.75                         | 345                 | 1.37                         |
| 275                 | 2.34                         | 350                 | 1.05                         |
| 280                 | 2.99                         | 355                 | 0.44                         |
| 285                 | 3.68                         | 360                 | 0.14                         |
| 290                 | 4.36                         | 365                 | 0.08                         |
| 295                 | 4.97                         | 370                 | 0.07                         |
| 300                 | 5.41                         | 375                 | 0.05                         |

### 5860 Quantum Yields of $C_2F_5CHO$

5861  $\Phi_1 = 0.38$  at 254 nm  
 5862  $\Phi_3 = 0.43$  at 254 nm  
 5863  $\Phi_1 = 0.30$  at 308 nm

#### 5864 Reliability

5865  $\Delta\Phi_1 = \pm 0.10$   
 5866  $\Delta\Phi_3 = \pm 0.10$

#### 5867 Comments on Preferred Values

5871 There is good agreement in the absorption cross sections measured at 298 K by Borkowski and  
 5872 Ausloss, (1962), Pritchard et al. (1962), Hashikawa et al. (2004), Chiappero et al. (2006), and  
 5873 Antiñolo et al. (2014). Taking an average of the results from Hashikawa et al. (2004), Chiappero et  
 5874 al. (2006), and Antiñolo et al. (2014) gives the recommended values. The quantum yield  
 5875 measurements at 254 nm reported by Chiappero et al. (2006) and at 308 nm by Antiñolo et al. (2014)  
 5876 are recommended.  
 5877

5878 Chiappero et al. (2006) assumed a wavelength independent photolysis quantum yield of 0.14  
 5879 for  $C_2F_5CHO$  (based upon a linear interpolation of the measured quantum yields for  $CF_3CHO$  and  
 5880  $C_4F_9CHO$ ) at 308 nm and estimated the photolysis lifetimes in the summer and winter solstices and  
 5881 the fall and spring equinoxes. Chiappero et al. (2006) averaged the lifetimes to give annual averages

5882 of approximately 0.9 days at 11 km altitude and 2.5 days at 0 km. Antiñolo et al. (2014) assumed an  
5883 exponential decrease of photolysis quantum yield with increasing wavelength from 0.81 at 254 nm  
5884 (Chiappero et al., 2006) to 0.30 at 308 nm (Antiñolo et al., 2014) and lower for wavelengths longer  
5885 than 308 nm. Antiñolo et al. (2014) estimated a photolysis lifetime of 3.5 hours at an altitude of 3.5  
5886 km and solar zenith angle of 16° (local noon in Ciudad Real, Spain, in summer). Photolysis is the  
5887 dominant atmospheric fate of C<sub>2</sub>F<sub>5</sub>CHO.  
5888

### 5889 **References**

- 5890  
5891 Antiñolo, M., Jiménez, E., Gonzalez, S., and Albaladejo, J.: *J. Phys. Chem. A*, 118, 178, 2014.  
5892 Borkowski, R. P., and Ausloss, P.: *J. Am. Chem. Soc.*, 84, 4044, 1962.  
5893 Calvert, J. G., Mellouki, A., Orlando, J. J., Pilling, M. J., and Wallington T. J.: *The Mechanisms of*  
5894 *Atmospheric Oxidation of the Oxygenates*, Oxford University Press, New York, NY, 2010.  
5895 Chiappero M. S., Malanca, F. E., Argüello, G. A., Wooldridge, S. T., Hurley, M. D., Ball, J. C.,  
5896 Wallington, T. J., Waterland, R. L., and Buck, R. C.: *J. Phys. Chem. A*, 110, 11944, 2006.  
5897 Hashikawa, Y., Kawasaki, M., Waterland, R. L., Sulbaek Andersen, M. P., Nielsen, O. J., Hurley, M.  
5898 D.; Ball, J. C.; and Wallington, T. J.: *J. Fluorine Chem.*, 125, 1925, 2004.  
5899 Pritchard, G. O., Miller, G. H., and Foote, J. K.: *Can. J. Chem.*, 40, 1830, 1962.  
5900  
5901

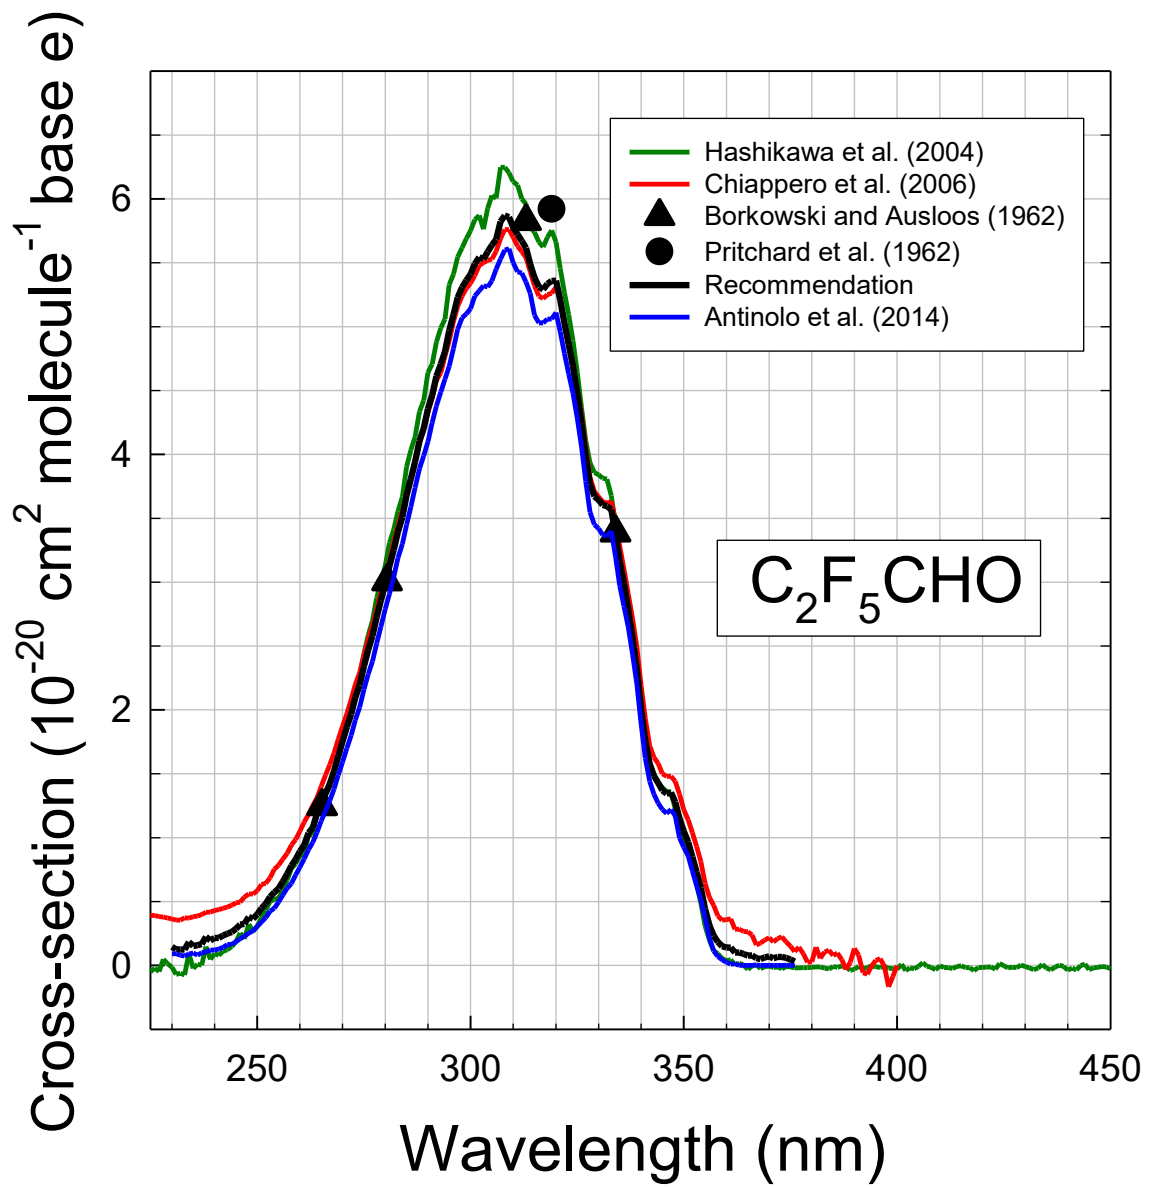

5907 **PF7: *n*-C<sub>3</sub>F<sub>7</sub>CHO + hv**  
 5908 Last evaluated: June 2025; last change in preferred values: June 2010.  
 5909

5910 ***n*-C<sub>3</sub>F<sub>7</sub>CHO + hv → products**

5911 **Primary photochemical transitions**  
 5912  
 5913  
 5914

| Reaction                               |                                        |     |
|----------------------------------------|----------------------------------------|-----|
| C <sub>2</sub> F <sub>5</sub> CHO + hv | → C <sub>2</sub> F <sub>5</sub> + HCO  | (1) |
|                                        | → C <sub>2</sub> F <sub>5</sub> CO + H | (2) |
|                                        | → C <sub>2</sub> F <sub>5</sub> H + CO | (3) |

5915 **Absorption cross-section data**  
 5916  
 5917

| Wavelength range/nm | References                   | Comments |
|---------------------|------------------------------|----------|
| 265-334             | Borkowski and Ausloss (1962) | (a)      |
| 185-500             | Hashikawa et al. (2004)      | (b)      |
| 230-400             | Chiappero et al. (2006)      | (c)      |
| 230-390             | Solignac et al. (2007)       | (d)      |

5918 **Quantum yield data**  
 5919  
 5920

| Measurement                      | Wavelength/nm | References              | Comments |
|----------------------------------|---------------|-------------------------|----------|
| Φ <sub>1</sub> = 0.31±0.07       | 254           | Chiappero et al. (2006) | (e)      |
| Φ <sub>3</sub> = 0.32±0.07       | 254           | Chiappero et al. (2006) | (e)      |
| Φ <sub>Total</sub> = 0.023±0.012 | 290-400       | Solignac et al. (2007)  | (f)      |

5921 **Comments**  
 5922  
 5923

- 5924 (a) The absolute absorption cross-section at 319 nm was measured using a UV spectrometer.  
 5925 (b) Absolute absorption cross-sections were measured using a diode array spectrometer at 298 K. The UV spectrum of *n*-C<sub>3</sub>F<sub>7</sub>CHO shows a broad band, centered at 310 nm and extending out to approximately 360 nm. Values of σ were given at 1 nm intervals.  
 5926  
 5927  
 5928 (c) Absolute absorption cross-sections were measured using a diode array spectrometer at 248-297 K. The UV spectrum of *n*-C<sub>3</sub>F<sub>7</sub>CHO shows a broad band, centered at 310 nm and extending out to approximately 360 nm. Values of σ were given at 1 nm intervals. There was no discernible effect of temperature on the UV spectrum.  
 5929  
 5930  
 5931 (d) Absolute absorption cross-sections were measured with a resolution of 0.1 nm using a diode array spectrometer for 1.4–8.0 Torr (1.9-10.7 mbar) samples of *n*-C<sub>3</sub>F<sub>7</sub>CHO at 298 K. The UV spectrum of *n*-C<sub>3</sub>F<sub>7</sub>CHO shows a broad band, centered at 310 nm and extending out to approximately 360 nm. Values of σ were given at 1 nm intervals.  
 5932  
 5933  
 5934 (e) Photolysis quantum yield measured using perfluoroacetic anhydride as a chemical actinometer. Mixtures of 0.5-5.5 mbar of *n*-C<sub>3</sub>F<sub>7</sub>CHO and 20-70 mbar of NO (added as radical scavenger) were irradiated using a low-pressure ozone free Hg lamp and the rate of loss of *n*-C<sub>3</sub>F<sub>7</sub>CHO was compared to that of perfluoroacetic anhydride in similar experiments. The formation of *n*-C<sub>3</sub>F<sub>7</sub>NO and *n*-C<sub>3</sub>F<sub>7</sub>H were measured by IR spectroscopy and used to derive quantum yields for processes (1) and (3).  
 5935  
 5936  
 5937  
 5938  
 5939 (f) Photolysis of *n*-C<sub>3</sub>F<sub>7</sub>CHO in one atmosphere of pure dry air in the presence of an OH radical tracer (di-*n*-butyl ether)

5940 in the ~200 m<sup>3</sup> EUPHORE chamber facility under natural sunlight conditions. The measured rate of photolysis of *n*-  
 5941 C<sub>3</sub>F<sub>7</sub>CHO was (1.3 ± 0.6) × 10<sup>-5</sup> s<sup>-1</sup>. When compared to the maximum photolysis rate calculated using unit quantum  
 5942 yield for photodissociation across the atmospheric range of absorption of *n*-C<sub>3</sub>F<sub>7</sub>CHO a quantum yield of 0.023 ±  
 5943 0.012 was derived.

5944 **Preferred Values**

5945 **Absorption cross-sections of *n*-C<sub>3</sub>F<sub>7</sub>CHO at 298 K**

5946

| λ/nm | 10 <sup>20</sup> σ/cm <sup>2</sup> | λ/nm | 10 <sup>20</sup> σ/cm <sup>2</sup> |
|------|------------------------------------|------|------------------------------------|
| 200  | 0.34                               | 305  | 7.97                               |
| 205  | 0.12                               | 310  | 8.29                               |
| 210  | 0.21                               | 315  | 7.77                               |
| 215  | 0.16                               | 320  | 7.83                               |
| 220  | 0.11                               | 325  | 6.40                               |
| 225  | 0.14                               | 330  | 5.32                               |
| 230  | 0.09                               | 335  | 4.74                               |
| 235  | 0.10                               | 340  | 2.91                               |
| 240  | 0.15                               | 345  | 1.98                               |
| 245  | 0.24                               | 350  | 1.52                               |
| 250  | 0.41                               | 355  | 0.65                               |
| 255  | 0.68                               | 360  | 0.13                               |
| 260  | 1.03                               | 365  | 0.04                               |
| 265  | 1.54                               | 370  | 0.00                               |
| 270  | 2.18                               |      |                                    |
| 275  | 2.97                               |      |                                    |
| 280  | 3.87                               |      |                                    |
| 285  | 4.87                               |      |                                    |
| 290  | 5.83                               |      |                                    |
| 295  | 6.79                               |      |                                    |
| 300  | 7.45                               |      |                                    |

5949 **Quantum Yields of *n*-C<sub>3</sub>F<sub>7</sub>CHO**

5950  
 5951  
 5952 Φ<sub>1</sub> = 0.31 at 254 nm  
 5953 Φ<sub>3</sub> = 0.32 at 254 nm

5954  
 5955 *Reliability*

5956 ΔΦ<sub>1</sub> = ± 0.10  
 5957 ΔΦ<sub>3</sub> = ± 0.10

5958  
 5959 *Comments on Preferred Values*

5960 There is good agreement between the absorption cross sections measured by Borkowski and Ausloss,  
 5961 (1962), Hashikawa et al. (2004), Chiappero et al. (2006), and Solignac et al. (2007). Taking an  
 5962 average of the results from Hashikawa et al. (2004), Chiappero et al. (2006), and Solignac et al.  
 5963 (2007) gives the recommended values. The quantum yield measurements at 254 nm reported by  
 5964 Chiappero et al. (2006) and at 290-400 nm are recommended.

5965 Chiappero et al. (2006) assumed a wavelength independent photolysis quantum yield of 0.11  
 5966 for *n*-C<sub>3</sub>F<sub>7</sub>CHO (based upon a linear interpolation of the measured quantum yields for CF<sub>3</sub>CHO and  
 5967 C<sub>4</sub>F<sub>9</sub>CHO) at 308 nm and estimated the photolysis lifetimes in the summer and winter solstices and  
 5968 the fall and spring equinoxes. Chiappero et al. (2006) averaged the lifetimes to give annual averages  
 5969 of approximately 0.75 days at 11 km altitude and 2 days at 0 km. Use of the recommended quantum  
 5970 yield of 0.023 in place of the value of 0.11 used by Chiappero et al. (2006) will increase the photolytic  
 5971 lifetimes by approximately a factor of 5. In either case, photolysis is the dominant atmospheric fate of  
 5972 *n*-C<sub>3</sub>F<sub>7</sub>CHO.

5973  
 5974

5975  
5976  
5977  
5978  
5979  
5980  
5981  
5982  
5983  
5984  
5985

## References

- Borkowski, R. P., and Ausloos, P.: *J. Am. Chem. Soc.*, 84, 4044, 1962.  
Chiappero M. S., Malanca, F. E., Argüello, G. A., Wooldridge, S. T., Hurley, M. D., Ball, J. C., Wallington, T. J., Waterland, R. L., and Buck, R. C.: *J. Phys. Chem. A*, 110, 11944, 2006.  
Hashikawa, Y., Kawasaki, M., Waterland, R. L., Sulbaek Andersen, M. P., Nielsen, O. J., Hurley, M. D.; Ball, J. C.; and Wallington, T. J.: *J. Fluorine Chem.*, 125, 1925, 2004.  
Pritchard, G. O., Miller, G. H., Foote, J. K.: *Can. J. Chem.*, 40, 1830, 1962.  
Solignac, G., Mellouki, A., Le Bras, G., Yujing, M., and Sidebottom, H.: *Phys. Chem. Chem. Phys.*, 9, 4200, 2007.

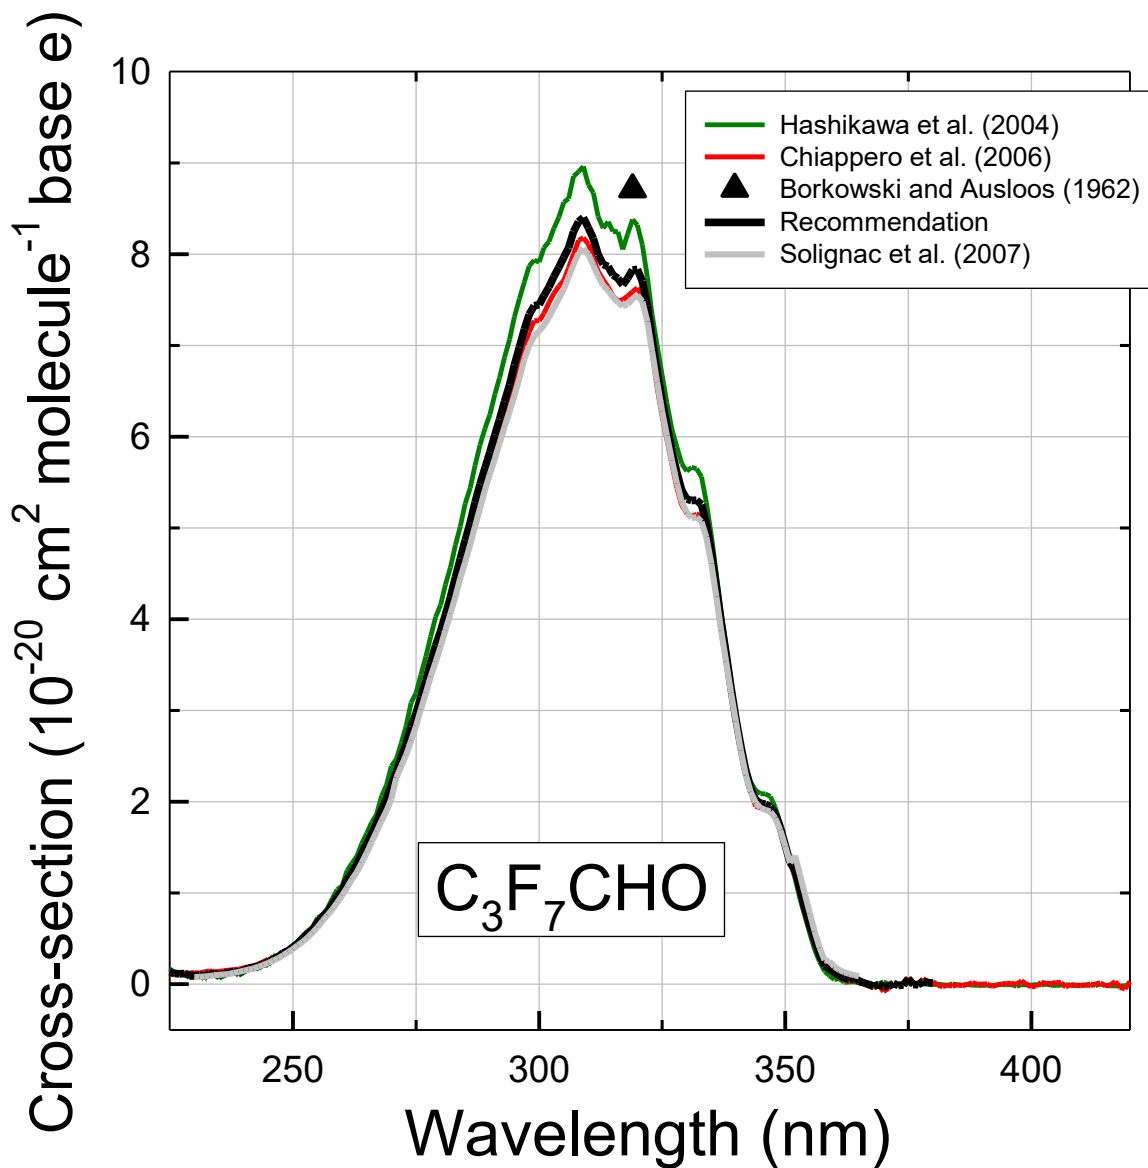

5986  
5987

5988 **PF8: *n*-C<sub>4</sub>F<sub>9</sub>CHO + hv**  
5989 Last evaluated: June 2025; last change in preferred values: June 2010.  
5990

5991  
5992 ***n*-C<sub>4</sub>F<sub>9</sub>CHO + hv → products**

5993  
5994 **Primary photochemical transitions**

5995

| Reaction                                                                                         |     |
|--------------------------------------------------------------------------------------------------|-----|
| <i>n</i> -C <sub>4</sub> F <sub>9</sub> CHO + hv → <i>n</i> -C <sub>4</sub> F <sub>9</sub> + HCO | (1) |
| → <i>n</i> -C <sub>4</sub> F <sub>9</sub> CO + H                                                 | (2) |
| → <i>n</i> -C <sub>4</sub> F <sub>9</sub> H + CO                                                 | (3) |

5996  
5997 **Absorption cross-section data**

5998

| Wavelength range/nm | References              | Comments |
|---------------------|-------------------------|----------|
| 185-500             | Hashikawa et al. (2004) | (a)      |
| 230-400             | Chiappero et al. (2006) | (b)      |
| 230-390             | Solignac et al. (2007)  | (c)      |

5999  
6000 **Quantum yield data**

6001

| Measurement                      | Wavelength/nm | References              | Comments |
|----------------------------------|---------------|-------------------------|----------|
| Φ <sub>1</sub> = 0.31±0.08       | 254           | Chiappero et al. (2006) | (d)      |
| Φ <sub>3</sub> = 0.29±0.07       | 254           | Chiappero et al. (2006) | (d)      |
| Φ <sub>Total</sub> = 0.08±0.02   | 308           | Chiappero et al. (2006) | (e)      |
| Φ <sub>Total</sub> = 0.029±0.015 | 290-390       | Solignac et al. (2007)  | (f)      |

6002  
6003  
6004 **Comments**

- 6005 (a) Absolute absorption cross-sections were measured using a diode array spectrometer at 298 K. The UV spectrum of *n*-  
6006 C<sub>4</sub>F<sub>9</sub>CHO shows a broad band, centered at 310 nm and extending out to approximately 360 nm. Values of σ were  
6007 given at 1 nm intervals.
- 6008 (b) Absolute absorption cross-sections were measured using a diode array spectrometer at 248-297 K. The UV spectrum  
6009 of *n*-C<sub>4</sub>F<sub>9</sub>CHO shows a broad band, centered at 310 nm and extending out to approximately 360 nm. Values of σ  
6010 were given at 1 nm intervals. There was no discernable effect of temperature over the range studied on the UV  
6011 spectrum.
- 6012 (c) Absolute absorption cross-sections were measured with a resolution of 0.1 nm using a diode array spectrometer for  
6013 1.5–11.0 Torr (2.0-14.7 mbar) samples of *n*-C<sub>4</sub>F<sub>9</sub>CHO at 298 K. The UV spectrum of *n*-C<sub>4</sub>F<sub>9</sub>CHO shows a broad  
6014 band, centered at 310 nm and extending out to approximately 360 nm. Values of σ were given at 1 nm intervals.
- 6015 (d) Photolysis quantum yield measured using perfluoroacetic anhydride as a chemical actinometer. Mixtures of 0.5-5.5  
6016 mbar of *n*-C<sub>4</sub>F<sub>9</sub>CHO and 20-70 mbar of NO (added as radical scavenger) were irradiated using a low-pressure ozone  
6017 free Hg lamp and the rate of loss of *n*-C<sub>4</sub>F<sub>9</sub>CHO was compared to that of perfluoroacetic anhydride in similar  
6018 experiments. The formation of *n*-C<sub>4</sub>F<sub>9</sub>NO and *n*-C<sub>4</sub>F<sub>9</sub>H were measured by IR spectroscopy and used to derive  
6019 quantum yields for processes (1) and (3).
- 6020 (e) Photolysis quantum yield measured using CH<sub>3</sub>CHO as a chemical actinometer. Mixtures of *n*-C<sub>4</sub>F<sub>9</sub>CHO and NO  
6021 (added as radical scavenger) in 700 Torr of N<sub>2</sub> diluent were irradiated using the 308 nm output of an excimer

6022 laser. The rate of loss of  $n\text{-C}_4\text{F}_9\text{CHO}$  was compared to that of  $\text{CH}_3\text{CHO}$  in back-to-back experiments. There was  
 6023 no evidence for the formation of  $n\text{-C}_4\text{F}_9\text{H}$  (<5% yield) following the irradiation of  $n\text{-C}_4\text{F}_9\text{CHO-NO-N}_2$  mixtures  
 6024 showing that process (3) is not significant.  
 6025 (f) Photolysis of  $n\text{-C}_4\text{F}_9\text{CHO}$  in one atmosphere of pure dry air in the presence of an OH radical tracer (di- $n$ -butyl ether)  
 6026 in the  $\sim 200\text{ m}^3$  EUPHORE chamber facility under natural sunlight conditions. The measured rate of photolysis of  $n\text{-C}_4\text{F}_9\text{CHO}$   
 6027 was  $(1.9 \pm 0.8) \times 10^{-5}\text{ s}^{-1}$ . When compared to the maximum photolysis rate calculated using unit quantum  
 6028 yield for photodissociation across the atmospheric range of absorption of  $n\text{-C}_4\text{F}_9\text{CHO}$  a quantum yield of  $0.029 \pm$   
 6029  $0.015$  was derived.

### 6030 Preferred Values

#### 6031 Absorption cross-sections of $n\text{-C}_4\text{F}_9\text{CHO}$ at 298 K

| $\lambda/\text{nm}$ | $10^{20}\ \sigma/\text{cm}^2$ | $\lambda/\text{nm}$ | $10^{20}\ \sigma/\text{cm}^2$ |
|---------------------|-------------------------------|---------------------|-------------------------------|
| 240                 | 0.05                          | 325                 | 7.59                          |
| 245                 | 0.19                          | 330                 | 6.31                          |
| 250                 | 0.40                          | 335                 | 5.61                          |
| 255                 | 0.73                          | 340                 | 3.46                          |
| 260                 | 1.19                          | 345                 | 2.33                          |
| 265                 | 1.79                          | 350                 | 1.80                          |
| 270                 | 2.53                          | 355                 | 0.69                          |
| 275                 | 3.47                          | 360                 | 0.08                          |
| 280                 | 4.52                          | 365                 | 0.00                          |
| 285                 | 5.69                          | 370                 | -0.08                         |
| 290                 | 6.84                          | 375                 | -0.05                         |
| 295                 | 8.01                          | 380                 | -0.04                         |
| 300                 | 8.82                          | 385                 | -0.05                         |
| 305                 | 9.44                          | 390                 | -0.05                         |
| 310                 | 9.87                          | 395                 | -0.03                         |
| 315                 | 9.22                          | 400                 | -0.04                         |
| 320                 | 9.32                          |                     |                               |

#### 6035 Quantum Yields of $n\text{-C}_4\text{F}_9\text{CHO}$

6036  $\Phi_1 = 0.31$  at 254 nm  
 6037  $\Phi_3 = 0.29$  at 254 nm  
 6038  $\Phi_{\text{Total}} = 0.08$  at 308 nm  
 6039  $\Phi_{\text{Total}} = 0.03$  at 290-390 nm

#### 6040 Reliability

6041  $\Delta\Phi_1 = \pm 0.10$  at 254 nm  
 6042  $\Delta\Phi_3 = \pm 0.10$  at 254 nm  
 6043  $\Delta\Phi_{\text{Total}} = \pm 0.04$  at 308 nm  
 6044  $\Delta\Phi_{\text{Total}} = 0.02$  at 290-390 nm

#### 6045 Comments on Preferred Values

6046 There is agreement between the absorption cross sections measured by Hashikawa et al. (2004),  
 6047 Chiappero et al. (2006), and Solignac et al. (2007). Taking an average of the results from Hashikawa  
 6048 et al. (2004), Chiappero et al. (2006), and Solignac et al. (2007) gives the recommended values. The  
 6049 quantum yield measurements at 254 and 308 nm reported by Chiappero et al. (2006) are  
 6050 recommended.

6051 Chiappero et al. (2006) assumed a wavelength independent photolysis quantum yield of 0.08  
 6052 for  $n\text{-C}_4\text{F}_9\text{CHO}$  (based on their data measured at 308 nm) and estimated the photolysis lifetimes in the  
 6053 summer and winter solstices and the fall and spring equinoxes. Chiappero et al. (2006) averaged the

6058 lifetimes to give annual averages of approximately 0.75 days at 11 km altitude and 2 days at 0 km.  
6059 Use of the recommended quantum yield of 0.03 in place of the value of 0.11 used by Chiappero et al.  
6060 (2006) will increase the photolytic lifetimes by approximately a factor of 4. In either case, photolysis  
6061 is the dominant atmospheric fate of *n*-C<sub>4</sub>F<sub>9</sub>CHO.  
6062

### 6063 References

6064  
6065 Chiappero M. S., Malanca, F. E., Argüello, G. A., Wooldridge, S. T., Hurley, M. D., Ball, J. C.,  
6066 Wallington, T. J., Waterland, R. L., and Buck, R. C.: J. Phys. Chem. A, 110, 11944, 2006.  
6067 Hashikawa, Y., Kawasaki, M., Waterland, R. L., Sulbaek Andersen, M. P., Nielsen, O. J., Hurley, M.  
6068 D.; Ball, J. C., and Wallington, T. J.: J. Fluorine Chem., 125, 1925, 2004.  
6069 Solignac, G., Mellouki, A., Le Bras, G., Yujing, M., and Sidebottom, H.: Phys. Chem. Chem. Phys., 9,  
6070 4200, 2007.  
6071

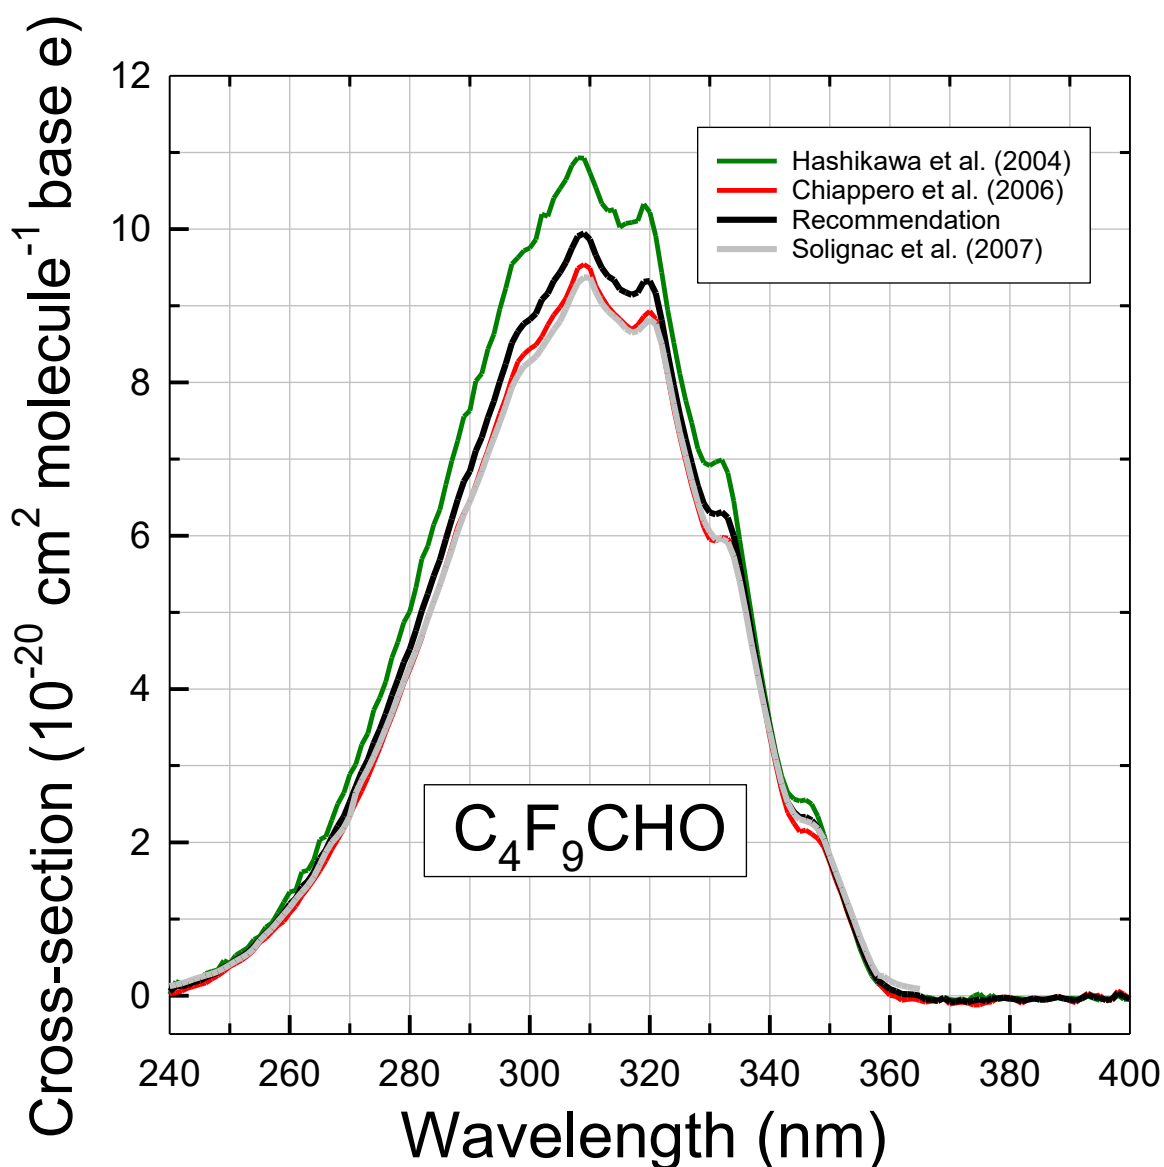

6072  
6073

6074 **PF9: CF<sub>3</sub>CH<sub>2</sub>CHO + hv**  
 6075 Last evaluated: June 2025; last change in preferred values: June 2014.  
 6076

6077  
 6078 **CF<sub>3</sub>CH<sub>2</sub>CHO + hv → products**

6079 **Primary photochemical transitions**  
 6080  
 6081

| Reaction                                                                             |
|--------------------------------------------------------------------------------------|
| CF <sub>3</sub> CH <sub>2</sub> CHO + hv → CF <sub>3</sub> CH <sub>2</sub> + HCO (1) |
| → CF <sub>3</sub> CH <sub>2</sub> CO + H (2)                                         |
| → CF <sub>3</sub> CH <sub>3</sub> + CO (3)                                           |

6082  
 6083 **Absorption cross-section data**  
 6084

| Wavelength range/nm | References              | Comments |
|---------------------|-------------------------|----------|
| 185-500             | Sellekvåg et al. (2004) | (a)      |
| 230-400             | Chiappero et al. (2006) | (b)      |
| 230-350             | Antiñolo et al. (2011)  | (c)      |

6085  
 6086 **Quantum yield data**  
 6087

| Measurement                      | Wavelength/nm | References              | Comments |
|----------------------------------|---------------|-------------------------|----------|
| Φ < 0.04                         | 290-400       | Sellekvåg et al. (2004) | (d)      |
| Φ <sub>1</sub> = 0.38±0.09       | 254           | Chiappero et al. (2006) | (e)      |
| Φ <sub>3</sub> = 0.36±0.07       | 254           | Chiappero et al. (2006) | (e)      |
| Φ <sub>Total</sub> = 0.04±0.01   | 308           | Chiappero et al. (2006) | (f)      |
| Φ <sub>Total</sub> = 0.023±0.012 | 308           | Antiñolo et al. (2011)  | (g)      |

6088  
 6089  
 6090 **Comments**

- 6091 (a) Absolute absorption cross-sections were measured using a diode array spectrometer at 298 K.  
 6092 The UV spectrum of CF<sub>3</sub>CH<sub>2</sub>CHO shows a broad band, centered at 295 nm and extending out to  
 6093 approximately 350 nm. Values of σ were given at 1 nm intervals.
- 6094 (b) Absolute absorption cross-sections were measured using a diode array spectrometer at 248-297  
 6095 K. The UV spectrum of CF<sub>3</sub>CH<sub>2</sub>CHO shows a broad band, centered at 295 nm and extending out  
 6096 to approximately 350 nm. Values of σ were given at 1 nm intervals. There was no discernable  
 6097 effect of temperature over the range studied on the UV spectrum.
- 6098 (c) Absolute absorption cross-sections were measured using a 0.5-m spectrograph with a coupled-  
 6099 charge device (CCD) detector with 1.0–7.4 Torr of CF<sub>3</sub>CH<sub>2</sub>CHO at 269 – 323 K. The spectrum  
 6100 had a peak at 290.82 ± 0.22 nm. Values of σ were given at 1 nm intervals.
- 6101 (d) Photolysis of CF<sub>3</sub>CH<sub>2</sub>CHO in pure dry air in the presence of an OH radical tracer (di-*n*-butyl  
 6102 ether) in the ~200 m<sup>3</sup> EUPHORE chamber facility under natural sunlight conditions. The

6103 measured first-order loss rate of CF<sub>3</sub>CH<sub>2</sub>CHO during a ~3 hr period around solar noon was 7.74  
6104 x 10<sup>-6</sup> s<sup>-1</sup>, essentially identical to the leak rate obtained from monitoring the decay of SF<sub>6</sub>. After  
6105 correction for the leak rate and reaction with OH radicals, the observed first-order loss rate of  
6106 CF<sub>3</sub>CH<sub>2</sub>CHO ascribed to photolysis during this ~3 hr period was  $J_{\text{obs}} < 1.5 \times 10^{-6} \text{ s}^{-1}$ . This was  
6107 compared to the maximum photolysis rate of  $3.4 \times 10^{-5} \text{ s}^{-1}$  calculated using a unit quantum yield  
6108 for photodissociation, the measured actinic flux within the chamber, and the measured UV  
6109 absorption spectrum. Taking a ratio of  $J_{\text{obs}}/J_{\text{calc}} = 1.5 \times 10^{-6}/3.4 \times 10^{-5}$  gives an upper limit for the  
6110 photolysis quantum yield of <0.04. Solignac et al. (2007) reported quantum yields  $J_{\text{obs}}/J_{\text{calc}} =$   
6111  $(0.023 \pm 0.012)$ ,  $(0.029 \pm 0.015)$ , and  $(0.046 \pm 0.028)$  for the photodissociation of C<sub>3</sub>F<sub>7</sub>CHO,  
6112 C<sub>4</sub>F<sub>9</sub>CHO and CF<sub>3</sub>(CF<sub>2</sub>)<sub>5</sub>CHO in the EUPHORE chamber across the atmospheric range of  
6113 absorption of the aldehydes. Solignac et al. (2007) suggested that the photolytic loss of  
6114 CF<sub>3</sub>CH<sub>2</sub>CHO may have been underestimated by Sellevåg et al. (2004).

6115 (e) Photolysis quantum yield measured using perfluoroacetic anhydride as a chemical actinometer.  
6116 Mixtures of 0.5-5.5 mbar of CF<sub>3</sub>CH<sub>2</sub>CHO and 20-70 mbar of NO (added as radical scavenger)  
6117 were irradiated using a low pressure Hg lamp and the rate of loss of CF<sub>3</sub>CH<sub>2</sub>CHO was compared  
6118 to that of perfluoroacetic anhydride in similar experiments. The formation of CF<sub>3</sub>CH<sub>2</sub>NO and  
6119 CF<sub>3</sub>CH<sub>3</sub> were measured by IR spectroscopy and used to derive quantum yields for processes (1)  
6120 and (3).

6121 (f) Photolysis quantum yield measured using CH<sub>3</sub>CHO as a chemical actinometer. Mixtures of *n*-  
6122 CF<sub>3</sub>CH<sub>2</sub>CHO and NO (added as radical scavenger) in 700 Torr of N<sub>2</sub> diluent were irradiated  
6123 using the 308 nm output of an excimer laser. The rate of loss of CF<sub>3</sub>CH<sub>2</sub>CHO was compared to  
6124 that of CH<sub>3</sub>CHO in back-to-back experiments. There was no evidence for the formation of  
6125 CF<sub>3</sub>CH<sub>3</sub> (<5% yield) following the irradiation of CF<sub>3</sub>CH<sub>2</sub>CHO –NO–N<sub>2</sub> mixtures showing that  
6126 process (3) is not significant.

6127 (g) Photolysis quantum yield measured using NO<sub>2</sub> and acetaldehyde as chemical actinometers with  
6128 pulsed laser photolysis of CF<sub>3</sub>CH<sub>2</sub>CHO at 308 nm in 25.4 – 760 Torr (34 – 1013 mbar) of air at  
6129 298 K. The quantum yield at λ=308 nm was pressure dependent, ranging from  $(0.142 \pm 0.098)$  at  
6130 75 Torr to  $(0.023 \pm 0.006)$  at 760 Torr. The pressure dependence is characterized by the  
6131 Stern–Volmer expression with a Stern-Volmer constant of  $(3.25 \pm 0.48) \times 10^{-19} \text{ cm}^3 \text{ molecule}^{-1}$ .  
6132 FTIR spectroscopy was used to identify the products following photolysis of CF<sub>3</sub>CH<sub>2</sub>CHO in air.  
6133 From the observed product distribution it was concluded that photolysis at 308 nm occurs  
6134 predominantly via channel (1) to give CF<sub>3</sub>CH<sub>2</sub> + HCO radicals.

### 6135 Preferred Values

#### 6136 Absorption cross-sections of CF<sub>3</sub>CH<sub>2</sub>CHO at 298 K

| λ/nm | 10 <sup>20</sup> σ/cm <sup>2</sup> | λ/nm | 10 <sup>20</sup> σ/cm <sup>2</sup> |
|------|------------------------------------|------|------------------------------------|
| 225  | 0.26                               | 300  | 3.59                               |
| 230  | 0.27                               | 305  | 3.02                               |
| 235  | 0.35                               | 310  | 3.00                               |
| 240  | 0.49                               | 315  | 2.12                               |
| 245  | 0.68                               | 320  | 1.82                               |
| 250  | 0.95                               | 325  | 1.44                               |
| 255  | 1.34                               | 330  | 0.69                               |
| 260  | 1.78                               | 335  | 0.67                               |
| 265  | 2.14                               | 340  | 0.24                               |
| 270  | 2.74                               | 345  | 0.07                               |
| 275  | 3.01                               | 350  | 0.04                               |
| 280  | 3.39                               | 355  | 0.04                               |
| 285  | 3.59                               | 360  | 0.01                               |
| 290  | 3.52                               | 365  | 0.00                               |
| 295  | 3.59                               | 370  |                                    |

6140

## Quantum Yields of CF<sub>3</sub>CH<sub>2</sub>CHO

6141  
6142  
6143  
6144  
6145  
6146  
6147  
6148  
6149  
6150  
6151  
6152  
6153  
6154  
6155  
6156  
6157  
6158  
6159  
6160  
6161  
6162  
6163  
6164  
6165  
6166  
6167  
6168  
6169  
6170  
6171  
6172  
6173  
6174  
6175  
6176  
6177  
6178  
6179  
6180  
6181  
6182  
6183  
6184  
6185  
6186  
6187

$\Phi_1 = 0.38$  at 254 nm

$\Phi_3 = 0.36$  at 254 nm

$\Phi_{\text{Total}} = 0.03$  at 308 nm

### *Reliability*

$\Delta\Phi_1 = \pm 0.10$  at 254 nm

$\Delta\Phi_3 = \pm 0.10$  at 254 nm

$\Delta\Phi_{\text{Total}} = \pm 0.01$  at 308 nm

### *Comments on Preferred Values*

There is good agreement between the absorption cross sections measured by Sellevåg et al. (2004), Chiappero et al. (2006), and Antiñolo et al. (2011) for  $\lambda > 260$  nm. At wavelengths below 260 nm the absorption cross sections reported by Antiñolo et al. (2011) are substantially larger than those reported by Sellevåg et al. (2004) and Chiappero et al. (2006). Taking an average of the results from Sellevåg et al. (2004), Chiappero et al. (2006), and those from Antiñolo et al. (2011) for  $\lambda > 260$  nm gives the recommended values. The quantum yield measurements at 254 nm reported by Chiappero et al. (2006) are recommended. The recommended quantum yield at 308 nm is an average of the results from Chiappero et al. (2006) and Antiñolo et al. (2011). The product identified by Antiñolo et al. (2011) indicate that photolysis at 308 nm proceeds predominately, if not exclusively, via channel (1).

Chiappero et al. (2006) assumed a wavelength and pressure independent photolysis quantum yield of 0.04 for CF<sub>3</sub>CH<sub>2</sub>CHO (based on their data measured at 308 nm) and estimated the photolysis lifetimes in the summer and winter solstices and the fall and spring equinoxes. Chiappero et al. (2006) averaged the lifetimes to give annual averages of approximately 11 days at 11 km altitude and 40 days at 0 km. Antiñolo et al. (2011) assumed a wavelength independent but pressure dependent photolysis quantum yield (based on their data measured at 308 nm) for CF<sub>3</sub>CH<sub>2</sub>CHO and reported photolysis rates of  $2.83 \times 10^{-6} \text{ s}^{-1}$  and  $1.0 \times 10^{-5} \text{ s}^{-1}$  at 0 km and 10 km altitude, respectively, for Ciudad Real, Spain (the solar zenith angle was unspecified, but it probably reflects noon in summer). The results from Chiappero et al. (2006) and Antiñolo et al. (2011) indicate that photolysis is an important atmospheric fate of CF<sub>3</sub>CH<sub>2</sub>CHO.

## References

- Antiñolo, M., Jiménez, E., and Albaladejo, J.: Phys. Chem. Chem. Phys. 13, 15936, 2011.
- Chiappero M. S., Malanca, F. E., Argüello, G. A., Wooldridge, S. T., Hurley, M. D., Ball, J. C., Wallington, T. J., Waterland, R. L., and Buck, R. C.: J. Phys. Chem. A, 110, 11944, 2006.
- Hashikawa, Y., Kawasaki, M., Waterland, R. L., Sulbaek Andersen, M. P., Nielsen, O. J., Hurley, M. D.; Ball, J. C.; and Wallington, T. J.: J. Fluorine Chem., 125, 1925, 2004.
- Sellevåg, S. R., Kelly, T., Sidebottom, H., and Nielsen, C. J.: Phys. Chem. Chem. Phys., 6, 1243, 2004.
- Solignac, G., Mellouki, A., Le Bras, G., Yujing, M., Sidebottom, H.: Phys. Chem. Chem. Phys. 9, 4200, 2007.

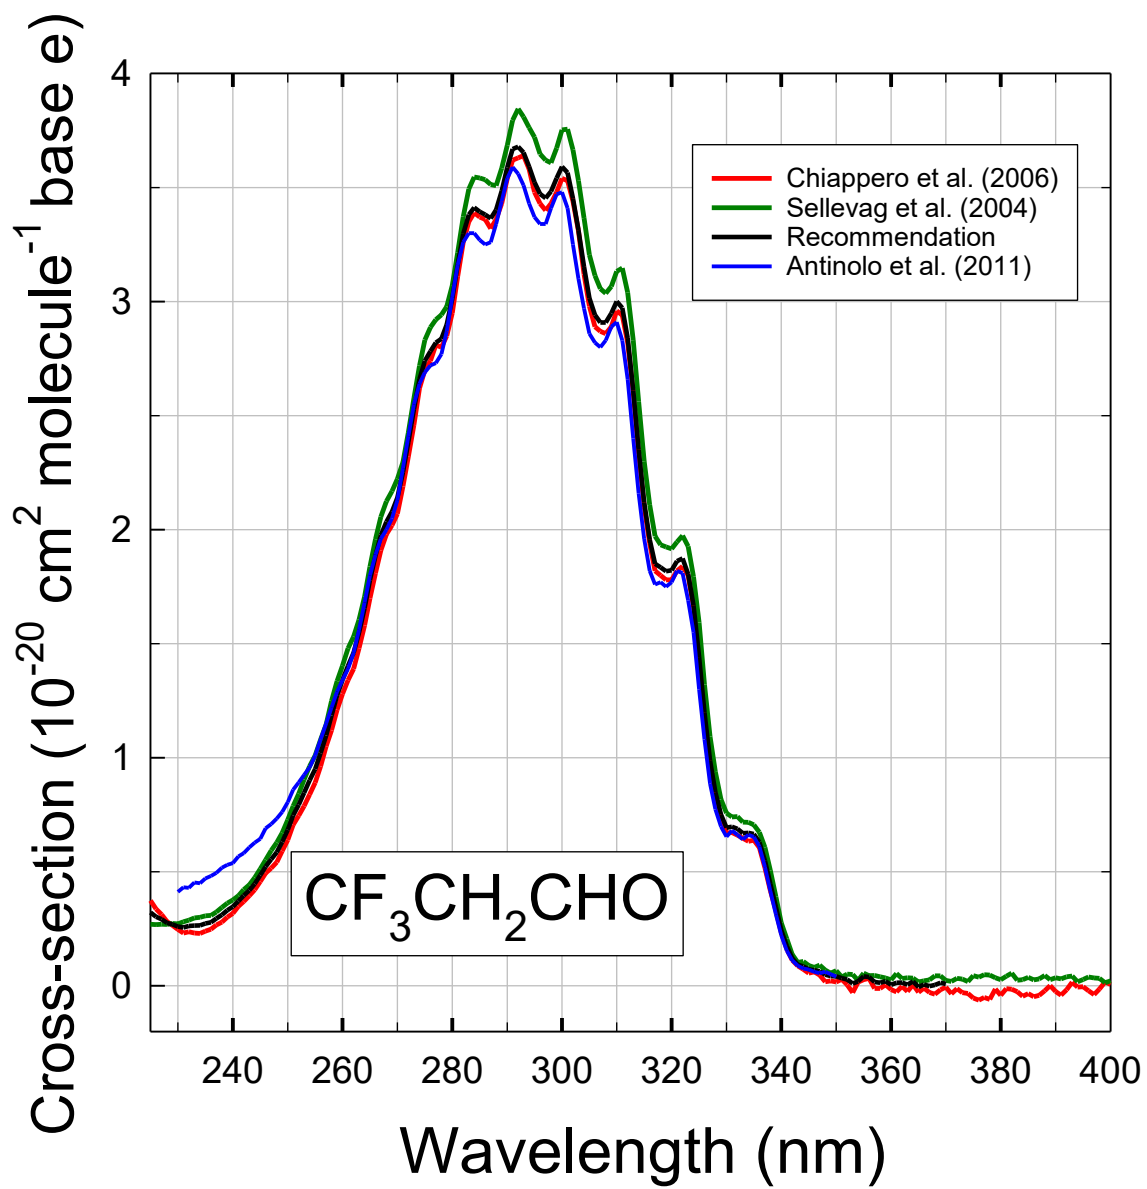

6188  
6189  
6190  
6191  
6192

6193 **PF10: *n*-C<sub>6</sub>F<sub>13</sub>CH<sub>2</sub>CHO + hv**  
6194 Last evaluated: June 2025; last change in preferred values: June 2010.  
6195

6196  
6197 ***n*-C<sub>6</sub>F<sub>13</sub>CH<sub>2</sub>CHO + hv → products**

6198  
6199 **Primary photochemical transitions**  
6200

| Reaction                                                                                                                           |     |
|------------------------------------------------------------------------------------------------------------------------------------|-----|
| <i>n</i> -C <sub>6</sub> F <sub>13</sub> CH <sub>2</sub> CHO + hv → <i>n</i> -C <sub>6</sub> F <sub>13</sub> CH <sub>2</sub> + HCO | (1) |
| → <i>n</i> -C <sub>6</sub> F <sub>13</sub> CH <sub>2</sub> CO + H                                                                  | (2) |
| → <i>n</i> -C <sub>6</sub> F <sub>13</sub> CH <sub>3</sub> + CO                                                                    | (3) |

6201  
6202 **Absorption cross-section data**  
6203

| Wavelength range/nm | References              | Comments |
|---------------------|-------------------------|----------|
| 230-400             | Chiappero et al. (2006) | (a)      |
| 230-350             | Solignac et al. (2007)  | (b)      |

6204  
6205 **Quantum yield data**  
6206

| Measurement                    | Wavelength/nm | References              | Comments |
|--------------------------------|---------------|-------------------------|----------|
| Φ <sub>Total</sub> = 0.55±0.09 | 254           | Chiappero et al. (2006) | (c)      |

6207  
6208  
6209 **Comments**

- 6210
- 6211 (a) The UV absorption spectrum was recorded using a single sample of 1.5 mbar of *n*-  
6212 C<sub>6</sub>F<sub>13</sub>CH<sub>2</sub>CHO in a 10 cm quartz cell using a diode array spectrometer at 297 K. The reported  
6213 UV spectrum of *n*-C<sub>6</sub>F<sub>13</sub>CH<sub>2</sub>CHO shows a broad band centered at 295 nm and extending out to  
6214 approximately 350 nm. Values of σ were given at 1 nm intervals.
- 6215 (b) Absolute absorption cross-sections were measured with a resolution of 0.1 nm using a diode  
6216 array spectrometer for 0.6–2.0 Torr (0.8–2.7 mbar) samples of *n*-C<sub>6</sub>F<sub>13</sub>CH<sub>2</sub>CHO in a 100 cm cell  
6217 at 298 K. The UV spectrum of *n*-C<sub>6</sub>F<sub>13</sub>CH<sub>2</sub>CHO shows a broad band centered at 285 nm and  
6218 extending out to approximately 350 nm. Values of σ were given at 1 nm intervals.
- 6219 (c) Photolysis quantum yield measured using perfluoroacetic anhydride as a chemical actinometer.  
6220 Mixtures of *n*-C<sub>6</sub>F<sub>13</sub>CH<sub>2</sub>CHO and NO (added as radical scavenger) were irradiated using a low  
6221 pressure Hg lamp and the rate of loss of *n*-C<sub>6</sub>F<sub>13</sub>CH<sub>2</sub>CHO was compared to that of  
6222 perfluoroacetic anhydride in similar experiments.

6223  
6224  
6225

6226  
6227  
6228  
6229**Preferred Values****Absorption cross-sections of *n*-C<sub>6</sub>F<sub>13</sub>CH<sub>2</sub>CHO at 298 K**

| $\lambda/\text{nm}$ | $10^{20} \sigma/\text{cm}^2$ | $\lambda/\text{nm}$ | $10^{20} \sigma/\text{cm}^2$ |
|---------------------|------------------------------|---------------------|------------------------------|
| 230                 | 1.27                         | 290                 | 5.20                         |
| 235                 | 1.25                         | 295                 | 4.79                         |
| 240                 | 1.59                         | 300                 | 4.66                         |
| 245                 | 1.97                         | 305                 | 3.90                         |
| 250                 | 2.43                         | 310                 | 3.78                         |
| 255                 | 2.57                         | 315                 | 2.67                         |
| 260                 | 3.12                         | 320                 | 2.37                         |
| 265                 | 3.80                         | 325                 | 1.79                         |
| 270                 | 4.39                         | 330                 | 1.03                         |
| 275                 | 5.01                         | 335                 | 0.75                         |
| 280                 | 5.27                         | 340                 | 0.30                         |
| 285                 | 5.30                         | 345                 | 0.18                         |
|                     |                              | 350                 | 0.00                         |

6230  
6231  
6232**Quantum Yields of *n*-C<sub>6</sub>F<sub>13</sub>CH<sub>2</sub>CHO**

$$\Phi_{\text{Total}} = 0.55 \text{ at } 254 \text{ nm}$$

6234

6235 *Reliability*

$$\Delta\Phi_{\text{Total}} = \pm 0.10 \text{ at } 254 \text{ nm}$$

6237

6238 *Comments on Preferred Values*

6239 The absorption spectrum reported by Chiappero et al. (2006) is based upon the measured  
6240 absorption by one sample using a 10 cm pathlength and is considered less reliable than that measured  
6241 by Solignac et al. (2007) using a range of sample partial pressures in a 100 cm absorption cell. The  
6242 absorption spectrum from Solignac et al. (2007) is recommended.

6243 Chiappero et al. (2006) assumed a wavelength independent photolysis quantum yield of 0.01  
6244 for *n*-C<sub>6</sub>F<sub>13</sub>CH<sub>2</sub>CHO (based on an assumption that the quantum yield depends inversely on the  
6245 molecular size of the fluorinated aldehyde and that the quantum yield for photolysis of *n*-  
6246 C<sub>6</sub>F<sub>13</sub>CH<sub>2</sub>CHO is approximately one quarter less than that for CF<sub>3</sub>CH<sub>2</sub>CHO measured at 308 nm) and  
6247 estimated the photolysis lifetimes in the summer and winter solstices and the fall and spring  
6248 equinoxes. Chiappero et al. (2006) averaged the lifetimes to give annual averages of approximately 8  
6249 days at 11 km altitude and 20 days at 0 km. Measurements of the photolysis quantum yield at  
6250 atmospherically relevant wavelengths are needed to better understand the role of photolysis in the  
6251 atmospheric chemistry of this molecule.

6252

6253

6254

6255

**References**

6256 Chiappero M. S., Malanca, F. E., Argüello, G. A., Wooldridge, S. T., Hurley, M. D., Ball, J. C.,  
6257 Wallington, T. J., Waterland, R. L., and Buck, R. C.: J. Phys. Chem. A, 110, 11944, 2006.  
6258 Solignac, G., Mellouki, A., Le Bras, G., Yujing, M., and Sidebottom, H.: Phys. Chem. Chem. Phys.,  
6259 9, 4200, 2007.

6260

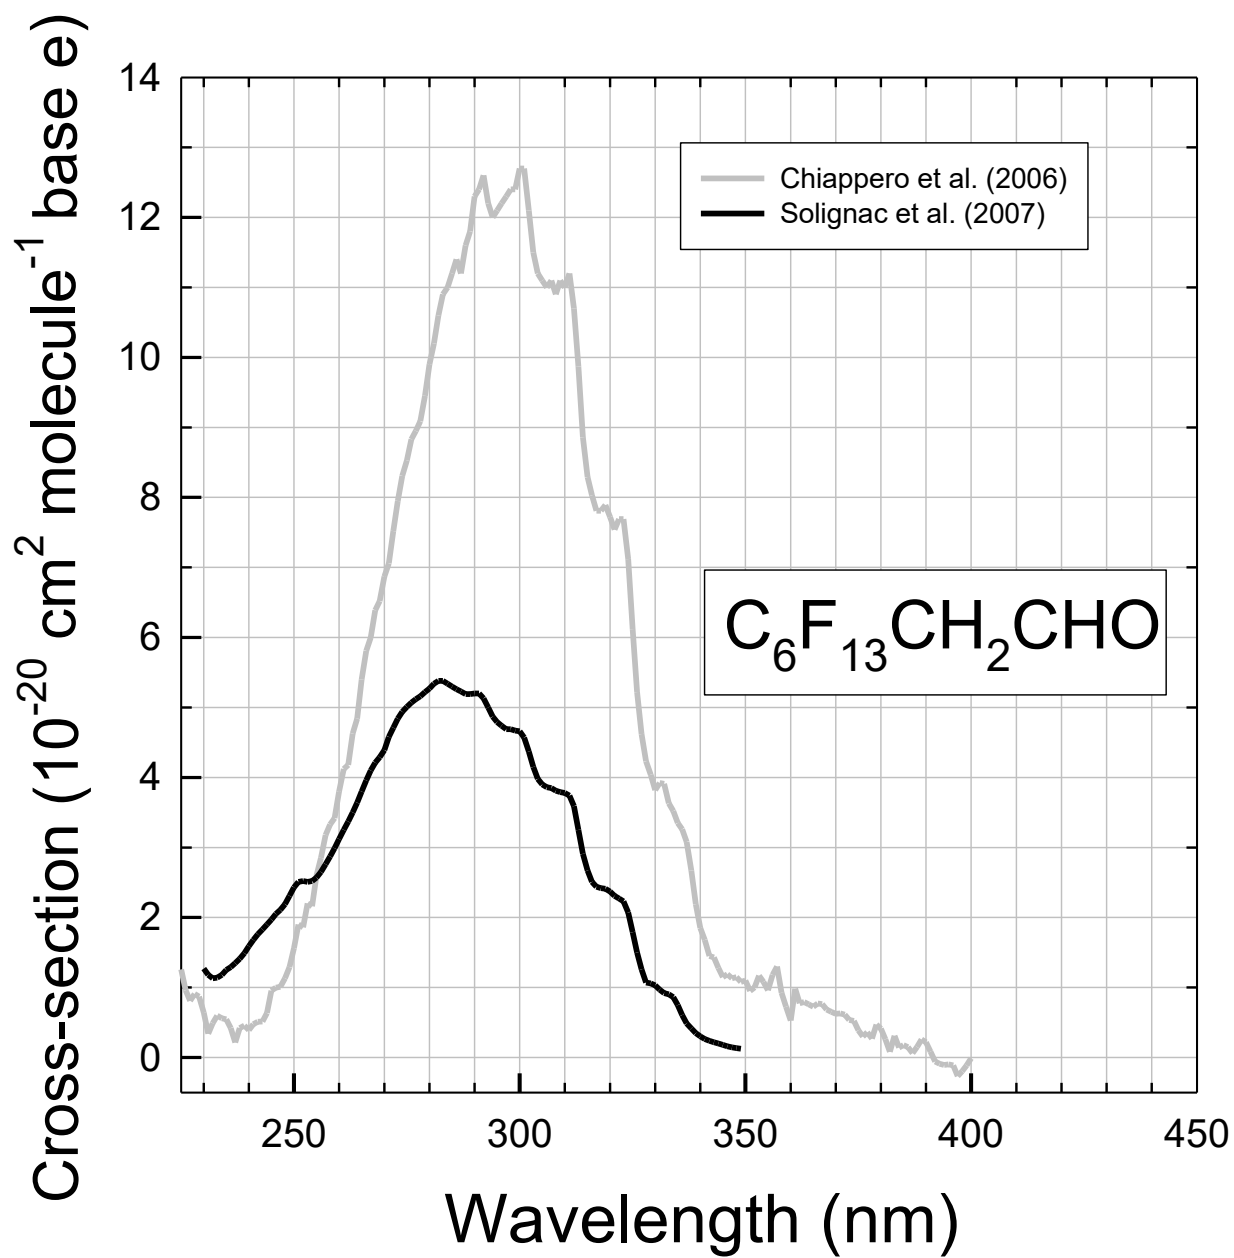

6261  
6262
